# Supplementary material for: The Caudate Nucleus Undergoes Dramatic and Unique Transcriptional Changes in Human Prodromal Huntington’s Disease Brain
Source: bioRxiv preprint, doi:10.1101/520312, version 2 (2019-01-16)
Supplement: Supplemental Table 1 - Sample Info [file 520312_file02.xlsx]

## Sheet: HD_mRNASeq_sample_info
Dataset.dataset_id	Sample.region	Subject.subject_type	Subject.death	Subject.sex	HDSubject.CAG	Dataset.batch	mRNASeq.readlen	mRNASeq.RIN
H_0513_BA9_mRNASeq	BA9	HD	68	M	42	mRNA_HD3	101	7.6
H_0539_BA9_mRNASeq	BA9	HD	54	M	45	mRNA_PD3	101	6.5
H_0001_BA9_mRNASeq	BA9	HD	55	M	45	mRNA_HD1	101	7.1
H_0601_BA9_mRNASeq	BA9	HD	56	F	45	mRNA_HD3	101	7.8
H_0002_BA9_mRNASeq	BA9	HD	69	M	41	mRNA_HD1	101	7.5
H_0656_BA9_mRNASeq	BA9	HD	68	M	42	mRNA_HD3	101	6
H_0657_BA9_mRNASeq	BA9	HD	61	M	45	mRNA_PD3	101	8.1
H_0658_BA9_mRNASeq	BA9	HD	48	M	44	mRNA_PD3	101	7.8
H_0003_BA9_mRNASeq	BA9	HD	71	M	43	mRNA_HD1	101	7
H_0681_BA9_mRNASeq	BA9	HD	69	M	42	mRNA_PD3	101	7
H_0689_BA9_mRNASeq	BA9	HD	68	F	43	mRNA_HD3	101	6.4
H_0005_BA9_mRNASeq	BA9	HD	48	M	48	mRNA_HD1	101	6.9
H_0006_BA9_mRNASeq	BA9	HD	40	M	51	mRNA_HD1	101	6.2
H_0695_BA9_mRNASeq	BA9	HD	55	M	45	mRNA_PD3	101	7.9
H_0007_BA9_mRNASeq	BA9	HD	72	M	41	mRNA_HD1	101	8.5
H_0008_BA9_mRNASeq	BA9	HD	43	M	49	mRNA_HD1	101	7.4
H_0700_BA9_mRNASeq	BA9	HD	50	M	47	mRNA_PD3	101	8
H_0009_BA9_mRNASeq	BA9	HD	68	M	42	mRNA_HD1	101	7.8
H_0010_BA9_mRNASeq	BA9	HD	59	M	46	mRNA_HD1	101	8.3
H_0709_BA9_mRNASeq	BA9	HD	51	M	45	mRNA_HD3	101	8.1
H_0012_BA9_mRNASeq	BA9	HD	68	M	42	mRNA_HD1	101	6
H_0723_BA9_mRNASeq	BA9	HD	78	M	40	mRNA_HD3	101	7.9
H_0013_BA9_mRNASeq	BA9	HD	57	M	49	mRNA_HD1	101	6.1
H_0726_BA9_mRNASeq	BA9	HD	50	M	48	mRNA_PD3	101	9.2
H_0014_BA9_mRNASeq	BA9	HD	48	M	45	mRNA_HD1	101	6.7
H_0740_BA9_mRNASeq	BA9	HD	75	M	42	mRNA_PD3	101	6.4
H_0750_BA9_mRNASeq	BA9	HD	53	M	48	mRNA_PD3	101	6
H_0791_BA9_mRNASeq	BA9	HD	54	F		mRNA_asymHD	101	7.7
H_0802_BA9_mRNASeq	BA9	HD	51	F		mRNA_asymHD	101	6.7
H_0821_BA9_mRNASeq	BA9	HD	71	F		mRNA_asymHD	101	6.4
H_1105_BA9_mRNASeq	BA9	HDpos	49	M		mRNA_HD4	101	8.1
H_1105_CAP_mRNASeq	CAU	HDpos	49	M		mRNA_HD4	101	7.7
H_1104_BA9_mRNASeq	BA9	HDpos	86	F		mRNA_HD4	101	7.2
H_1104_CAP_mRNASeq	CAU	HDpos	86	F		mRNA_HD4	101	7
H_1106_BA9_mRNASeq	BA9	HDpos	19	M		mRNA_HD4	101	8.4
C_0002_BA9_mRNASeq	BA9	Control	73	M		mRNA_PD1	101	7.7
C_0003_BA9_mRNASeq	BA9	Control	91	M		mRNA_PD2	101	7.9
C_0004_BA9_mRNASeq	BA9	Control	82	M		mRNA_PD1	101	8.6
C_0005_BA9_mRNASeq	BA9	Control	97	M		mRNA_PD2	101	9.1
C_0006_BA9_mRNASeq	BA9	Control	86	M		mRNA_PD1	101	8.6
C_0008_BA9_mRNASeq	BA9	Control	91	M		mRNA_PD1	101	8.7
C_0050_BA9_mRNASeq	BA9	Control	74	M		mRNA_PD3	101	8.5
C_0053_BA9_mRNASeq	BA9	Control	69	M		mRNA_PD3	101	8.4
C_0054_BA9_mRNASeq	BA9	Control		F		mRNA_asymHD	101	8.7
C_0009_BA9_mRNASeq	BA9	Control	81	M		mRNA_PD1	101	7.9
C_0010_BA9_mRNASeq	BA9	Control	79	M		mRNA_PD1	101	8.4
C_0060_BA9_mRNASeq	BA9	Control	76	M		mRNA_PD3	101	7.5
C_0061_BA9_mRNASeq	BA9	Control	78	M		mRNA_PD3	101	7.6
C_0062_BA9_mRNASeq	BA9	Control	87	M		mRNA_PD3	101	8.7
C_0011_BA9_mRNASeq	BA9	Control	63	M		mRNA_PD2	101	7.7
C_0065_BA9_mRNASeq	BA9	Control	86	M		mRNA_PD3	101	8.7
C_0012_BA9_mRNASeq	BA9	Control	66	M		mRNA_PD2	101	7.1
C_0013_BA9_mRNASeq	BA9	Control	69	M		mRNA_PD2	101	7.8
C_0036_BA9_mRNASeq	BA9	Control	40	M		mRNA_HD1	101	7.5
C_0069_BA9_mRNASeq	BA9	Control	54	M		mRNA_PD3	101	8.3
C_0014_BA9_mRNASeq	BA9	Control	79	M		mRNA_PD1	101	8
C_0015_BA9_mRNASeq	BA9	Control	61	M		mRNA_PD1	101	8.2
C_0070_BA9_mRNASeq	BA9	Control	68	M		mRNA_PD3	101	6.3
C_0071_BA9_mRNASeq	BA9	Control	106	M		mRNA_PD3	101	7.6
C_0037_BA9_mRNASeq	BA9	Control	44	M		mRNA_HD1	101	8.3
C_0031_BA9_mRNASeq	BA9	Control	53	M		mRNA_HD1	101	7.3
C_0038_BA9_mRNASeq	BA9	Control	57	M		mRNA_HD1	101	7.7
C_0032_BA9_mRNASeq	BA9	Control	57	M		mRNA_HD1	101	8.3
C_0033_BA9_mRNASeq	BA9	Control	43	M		mRNA_HD1	101	7.5
C_0074_BA9_mRNASeq	BA9	Control	21	M		mRNA_HD4	101	9.2
C_0075_BA9_mRNASeq	BA9	Control	52	M		mRNA_PD3	101	7.4
C_0016_BA9_mRNASeq	BA9	Control	58	M		mRNA_PD2	101	8.4
C_0017_BA9_mRNASeq	BA9	Control	70	M		mRNA_PD2	101	8.2
C_0076_BA9_mRNASeq	BA9	Control	46	M		mRNA_HD4	101	8.2
C_0018_BA9_mRNASeq	BA9	Control	66	M		mRNA_PD1	101	8.5
C_0019_BA9_mRNASeq	BA9	Control	73	M		mRNA_PD2	101	7.5
C_0077_BA9_mRNASeq	BA9	Control	36	M		mRNA_PD3	101	8.5
C_0034_BA9_mRNASeq	BA9	Control	71	F		mRNA_HD1	101	7.8
C_0020_BA9_mRNASeq	BA9	Control	60	M		mRNA_PD2	101	7.9
C_0021_BA9_mRNASeq	BA9	Control	76	M		mRNA_PD1	101	7.3
C_0022_BA9_mRNASeq	BA9	Control	61	M		mRNA_PD2	101	7.8
C_0023_BA9_mRNASeq	BA9	Control	62	M		mRNA_PD2	101	6.6
C_0081_BA9_mRNASeq	BA9	Control	55	M		mRNA_PD3	101	7.6
C_0082_BA9_mRNASeq	BA9	Control	57	M		mRNA_PD3	101	7.8
C_0083_BA9_mRNASeq	BA9	Control	66	M		mRNA_PD3	101	8.4
C_0039_BA9_mRNASeq	BA9	Control	80	M		mRNA_HD1	101	7.3
C_0024_BA9_mRNASeq	BA9	Control	69	M		mRNA_PD2	101	8.7
C_0025_BA9_mRNASeq	BA9	Control	61	M		mRNA_PD2	101	8.1
C_0035_BA9_mRNASeq	BA9	Control	46	M		mRNA_HD1	101	7.6
C_0087_BA9_mRNASeq	BA9	Control	64	M		mRNA_PD3	101	8.7
C_0026_BA9_mRNASeq	BA9	Control	88	M		mRNA_PD2	101	7.1
C_0103_BA9_mRNASeq	BA9	Control	67	M		mRNA_asymHD	101	7
C_0106_BA9_mRNASeq	BA9	Control	64	F		mRNA_asymHD	101	6.5
C_0107_BA9_mRNASeq	BA9	Control	55	F		mRNA_asymHD	101	7.8
C_0029_BA9_mRNASeq	BA9	Control	93	M		mRNA_PD1	101	6.4
C_0113_CAP_mRNASeq	CAU	Control	51	M		mRNA_HD4	101	8.7
C_0114_CAP_mRNASeq	CAU	Control	82	F		mRNA_HD4	101	6.9
C_0091_BA9_mRNASeq	BA9	Control	89	F		mRNA_HD4	101
