# Supplementary material for: The Caudate Nucleus Undergoes Dramatic and Unique Transcriptional Changes in Human Prodromal Huntington’s Disease Brain
Source: bioRxiv preprint, doi:10.1101/520312, version 2 (2019-01-16)
Supplement: Supplemental Table 3 - Full fgsea results [file 520312_file03.xlsx]

## Sheet: FGSEA HD BA9 v C BA9 (1)
pathway	pval	padj	ES	NES	nMoreExtreme	size	leadingEdge	type
KEGG_RIBOSOME	0.000147362	0.00205808	0.718551	2.44615	0	87	RSL24D1P11 RPL22L1 RPL34 RPLP1 RPL21 RPL27A RPS27L RPL36 RPLP2 RPS15A RPS6 RPS26 RPS8 RPL39 RPS27 RPS17 RPL35 RPL35A RPS28 RPL11 RPL13A RPL30 RPS3A RPL23 RPS13 RPS24 RPS3 RPL9 RPL23A RPL13 RPL36AL RPS12 RPL17 RPL27 RPS16 RPL38 RPS21 RPS18 RPL5 RPS25 RPL18 RPL24 RPL18A RPL36A RPS11 RPL12 RPS29 RPL28 RPL8 RPL32 RPS19 RPS20 RPS27A RPS4X RPL19 RPL4 RPS7 RPL26 RPS2 RPS10 RPL10 RPS9 RPL22 FAU RPL29 RPL…	c2.cp
KEGG_CYTOKINE_CYTOKINE_RECEPTOR_INTERACTION	0.000127405	0.00205808	0.668542	2.56107	0	221	IL1R2 CCL26 PPBP CXCR1 CCR2 TNFRSF11B CCL2 CXCL6 CXCR2 CXCL1 CCL20 CSF3 TNFRSF6B IL18 IFNA2 TNFRSF10D CXCR4 IL18R1 IL6 CXCL3 IL18RAP LIF TSLP LTA CCR5 LEPR TNFRSF12A IL9 IL17RB CCR9 CXCL2 IL2RG OSMR IL4R KDR IL1R1 CCR1 HGF TNFRSF1A TNFRSF1B TNF CCL3 NGFR CXCL5 TNFRSF10A FLT1 IL1B TNFRSF10C CXCL13 TGFB1 CSF1 CCL27 IL2RA CCL17 OSM IL10 CSF2RB CD40LG FASLG CSF1R TNFSF11 IL15RA TGFBR2 CCL4 EGFR LTBR …	c2.cp
KEGG_CHEMOKINE_SIGNALING_PATHWAY	0.000133156	0.00205808	0.547779	2.03983	0	171	CCL26 PPBP CXCR1 CCR2 CCL2 CXCL6 CXCR2 CXCL1 CCL20 CXCR4 CXCL3 CCR5 CCR9 CXCL2 FGR NFKBIA PRKX CCR1 PARD3 CCL3 CXCL5 HCK RAC2 CXCL13 CCL27 CCL17 GNG11 GNG12 DOCK2 CCL4 GNG5 PIK3R5 RELA CXCR6 CCL5 PXN CXCL16 NCF1 WAS LYN PLCB3 ROCK1 XCL1	c2.cp
KEGG_TGF_BETA_SIGNALING_PATHWAY	0.00014806	0.00205808	0.590483	1.99633	0	83	PITX2 BMP5 BMP6 DCN ID3 BMP4 TNF SMAD6 ID1 TGFB1 MYC TGFBR2 ACVRL1 BMPR1B TGFB2 INHBE ID4 INHBB SP1 CDKN2B GDF5 TGFB3 ROCK1 BMPR1A SMAD5 TGFBR1 SMAD4 THBS1 LTBP1 E2F5 BMP7 LEFTY2 SMAD9 RBL1 PPP2R1B	c2.cp
KEGG_FOCAL_ADHESION	0.000131044	0.00205808	0.455897	1.72125	0	196	COL1A1 COL2A1 COL1A2 ITGA10 PDGFD COL6A2 KDR HGF COL6A3 PGF PARVG CAV3 FLT1 RAC2 MYL12A COL4A6 ITGA5 SPP1 COL3A1 ITGB4 ITGA1 VASP LAMB2 BIRC3 EGFR PIK3R5 ITGB8 CAV1 VWF PDGFRB CAPN2 PXN CAV2 VEGFA ERBB2 MYLPF LAMB4 ITGB1 ROCK1 BCL2 FN1 ITGB5 ARHGAP5 LAMA2 ITGA6 RAP1A ITGAV PPP1CC PIK3CG THBS1 FLT4 ELK1 RAP1B VEGFC VAV1 LAMA3 COL5A1 LAMC1 TLN1 COL4A4 PDGFC VAV3 PDGFRA ITGA8 CCND1 PAK4 ITGA11 ITGB3…	c2.cp
KEGG_CELL_ADHESION_MOLECULES_CAMS	0.000139665	0.00205808	0.5971	2.1404	0	125	CLDN7 VCAM1 SELL PTPRC CD2 HLA-DRA CD86 ICAM1 HLA-G HLA-DMB ITGB2 HLA-DRB1 SIGLEC1 HLA-DRB5 ICAM2 PECAM1 CLDN19 HLA-DQA1 CD99 CLDN22 HLA-DPA1 CD58 CD34 CD40LG HLA-DQB1 CD4 SDC2 CD28 CLDN5 HLA-DPB1 HLA-DMA ITGB8 ICAM3 ITGAM VCAN CLDN15 ITGAL CDH1 CD40 HLA-E SELE ESAM PDCD1LG2 CDH5 CLDN23 SELP CLDN14 HLA-B ITGB1 PDCD1 ITGA6 ITGAV CLDN9 CLDN2 SDC4 MPZ HLA-DOA JAM2 F11R SELPLG	c2.cp
KEGG_COMPLEMENT_AND_COAGULATION_CASCADES	0.000153586	0.00205808	0.725538	2.33332	0	60	F13A1 SERPIND1 SERPINA5 C7 SERPINA1 CFH C3AR1 C5AR1 C1QB C1QA CR1 C4B C1QC CFI CFB C1R F10 SERPING1 C4A PLAUR C1S SERPINE1 SERPINF2 C6 C3 VWF F5 CFD PROS1 THBD C2 SERPINC1 CD55 F3 F2R PLAU TFPI CD59	c2.cp
KEGG_ANTIGEN_PROCESSING_AND_PRESENTATION	0.000151883	0.00205808	0.676819	2.20985	0	66	HSPA6 IFNA2 HSPA1A LTA HSPA1B IFI30 HLA-DRA HLA-G HLA-DMB HLA-DRB1 HLA-DRB5 CTSS HLA-DQA1 HLA-DPA1 CD74 KLRC3 HLA-DQB1 CD4 HLA-DPB1 HLA-DMA HLA-E KLRC4 B2M HLA-B TAP1 CIITA	c2.cp
KEGG_TOLL_LIKE_RECEPTOR_SIGNALING_PATHWAY	0.000145539	0.00205808	0.598837	2.06449	0	93	TLR8 LBP IFNA2 TLR2 CD14 IL6 CD86 LY96 TLR5 NFKBIA MAP3K8 TNF CCL3 IRF7 TLR7 TLR1 IL1B SPP1 FOS CCL4 TLR6 PIK3R5 TLR4 RELA CTSK CCL5 CD40 IL12A MYD88 IRF5 TLR3 TAB2 PIK3CG TICAM2	c2.cp
KEGG_NOD_LIKE_RECEPTOR_SIGNALING_PATHWAY	0.000153421	0.00205808	0.640575	2.04078	0	56	CCL2 CXCL1 CASP5 IL18 IL6 NOD2 CXCL2 TNFAIP3 NFKBIA CASP1 TNF CARD6 IL1B PYCARD BIRC3 RELA CCL5 CARD8 TAB2 TRIP6 PYDC1 CARD9	c2.cp
KEGG_JAK_STAT_SIGNALING_PATHWAY	0.00013887	0.00205808	0.516938	1.85839	0	127	SOCS3 CSF3 IFNA2 IL6 LIF TSLP LEPR IL9 IL2RG OSMR IL4R CISH MYC IL2RA OSM IL10 CSF2RB IL15RA IL13RA1 CSF3R PIK3R5 CTF1 PTPN6 STAT5A EPO PIM1 IL12A LIFR CSF2RA IL10RA IFNGR1 IL3RA IL6R SOCS4 IL7R IL24 IL20RA PIK3CG EPOR CLCF1 IL7 IL15 SOCS1 STAT3	c2.cp
KEGG_HEMATOPOIETIC_CELL_LINEAGE	0.000148832	0.00205808	0.710418	2.38128	0	79	IL1R2 CSF3 FCER2 CD3E ANPEP CD14 IL6 FCGR1A CR1 CD2 HLA-DRA IL4R CD44 MS4A1 IL1R1 HLA-DRB1 TNF HLA-DRB5 IL1B CSF1 ITGA5 CD37 CD7 IL2RA CD34 ITGA1 CD4 CSF1R CD33 CSF3R ITGAM EPO FLT3LG DNTT CSF2RA CD55 IL3RA CD3D IL6R IL7R ITGA6 CD59 EPOR GYPA	c2.cp
KEGG_NATURAL_KILLER_CELL_MEDIATED_CYTOTOXICITY	0.000141503	0.00205808	0.588541	2.08436	0	113	FCGR3B CD48 IFNA2 TNFRSF10D FCER1G FCGR3A ICAM1 HLA-G TYROBP SYK ITGB2 TNF ICAM2 HCST LCK TNFRSF10A RAC2 TNFRSF10C KLRC3 FASLG NFATC4 PIK3R5 TNFRSF10B PTPN6 NFATC2 ITGAL HLA-E NCR1 NCR3 FAS SH2D1A MICB IFNGR1 MICA NFATC1 HLA-B PLCG2	c2.cp
KEGG_LEUKOCYTE_TRANSENDOTHELIAL_MIGRATION	0.000141143	0.00205808	0.601743	2.13041	0	112	MMP9 CXCR4 CLDN7 VCAM1 ICAM1 NCF2 NCF4 ITGB2 CYBA PECAM1 CLDN19 CD99 RAC2 MYL12A EZR CLDN22 CYBB VASP CLDN5 PIK3R5 SIPA1 ITGAM CLDN15 ITGAL NOX1 ESAM PXN CDH5 NCF1 CLDN23 CLDN14 MYLPF PLCG2 ITGB1 RHOH MSN ROCK1 ARHGAP5 RAP1A MMP2 CLDN9 PIK3CG CLDN2 JAM2 F11R RAP1B VAV1 OCLN CLDN10 RAPGEF3 VAV3 GNAI3	c2.cp
KEGG_INTESTINAL_IMMUNE_NETWORK_FOR_IGA_PRODUCTION	0.000158228	0.00205808	0.714894	2.1783	0	44	CXCR4 IL6 HLA-DRA CCR9 CD86 HLA-DMB HLA-DRB1 HLA-DRB5 HLA-DQA1 PIGR TGFB1 CCL27 HLA-DPA1 IL10 CD40LG HLA-DQB1 CD28 IL15RA LTBR HLA-DPB1 HLA-DMA CD40	c2.cp
KEGG_TYPE_I_DIABETES_MELLITUS	0.000160927	0.00205808	0.671815	1.98906	0	38	LTA HLA-DRA CD86 HLA-G HLA-DMB HLA-DRB1 TNF HLA-DRB5 HLA-DQA1 IL1B HLA-DPA1 FASLG HLA-DQB1 CD28 HLA-DPB1 HLA-DMA HLA-E IL12A FAS HLA-B HLA-DOA CD80 HLA-DQA2 HLA-C HSPD1	c2.cp
KEGG_LEISHMANIA_INFECTION	0.000150852	0.00205808	0.741088	2.43932	0	69	FCGR3B FCGR2C TLR2 FCGR2A FCGR1A CR1 HLA-DRA FCGR3A NFKBIA NCF2 HLA-DMB NCF4 ITGB2 HLA-DRB1 CYBA TNF HLA-DRB5 HLA-DQA1 IL1B TGFB1 HLA-DPA1 IL10 FOS HLA-DQB1 HLA-DPB1 HLA-DMA TLR4 C3 RELA PTPN6 ITGAM IL12A TGFB2 NCF1 MYD88 IFNGR1 TGFB3 ITGB1	c2.cp
KEGG_PATHWAYS_IN_CANCER	0.000121036	0.00205808	0.460936	1.82228	0	313	MMP9 WNT6 GLI1 IL6 CDK2 BMP4 CDKN1A RUNX1 NFKBIA FZD2 NFKB2 HGF FGF23 PGF FGF2 GLI2 RAC2 COL4A6 TGFB1 MYC FASLG FOS CSF1R TGFBR2 LAMB2 FZD9 BIRC3 EGFR CSF3R PIK3R5 FOXO1 WNT16 SPI1 RELA PDGFRB FGF11 STAT5A MECOM CDH1 TCF7L1 TGFB2 FAS FLT3LG CDKN2A VEGFA CSF2RA ERBB2 FGF17 LEF1 FZD1 SMO CDKN2B WNT3 TGFB3 PAX8 LAMB4 PLCG2 ITGB1 SLC2A1 JUP BCL2 HDAC1 FN1 TGFBR1 LAMA2 ITGA6 ITGAV MMP2 PIK3CG SMAD4 CT…	c2.cp
KEGG_ASTHMA	0.000169405	0.00205808	0.818306	2.23245	0	25	FCER1A RNASE3 FCER1G IL9 HLA-DRA HLA-DMB HLA-DRB1 TNF HLA-DRB5 HLA-DQA1 HLA-DPA1 IL10 CD40LG HLA-DQB1 HLA-DPB1 HLA-DMA CD40	c2.cp
KEGG_AUTOIMMUNE_THYROID_DISEASE	0.000159617	0.00205808	0.650167	1.95588	0	41	IFNA2 HLA-DRA CD86 HLA-G HLA-DMB HLA-DRB1 HLA-DRB5 HLA-DQA1 HLA-DPA1 IL10 CD40LG FASLG HLA-DQB1 CD28 HLA-DPB1 HLA-DMA CD40 HLA-E FAS HLA-B TG HLA-DOA CD80 HLA-DQA2 HLA-C	c2.cp
KEGG_SYSTEMIC_LUPUS_ERYTHEMATOSUS	0.000144342	0.00205808	0.735162	2.55937	0	100	FCGR3B FCGR2B HIST1H2AD C7 FCGR2C HIST2H2AA3 FCGR2A C1QB C1QA FCGR1A HIST1H3H C4B HIST1H2AE HLA-DRA HIST1H2BH HIST1H2BD C1QC CD86 FCGR3A HIST1H2AM HLA-DMB HIST1H2BF HLA-DRB1 TNF HLA-DRB5 C1R HIST1H4C HLA-DQA1 HIST1H2AC HIST1H3D C4A HLA-DPA1 IL10 C1S CD40LG HIST1H2AG HLA-DQB1 HIST1H2BJ CD28 C6 HLA-DPB1 HLA-DMA HIST2H2AA4 C3 H2AFB2 HIST1H4E CD40 C2 H2BFM HIST2H2BE H2AFB3 HIST1H3E HIST1H4H HIST1H2BG…	c2.cp
KEGG_ALLOGRAFT_REJECTION	0.000164935	0.00205808	0.753173	2.16831	0	33	HLA-DRA CD86 HLA-G HLA-DMB HLA-DRB1 TNF HLA-DRB5 HLA-DQA1 HLA-DPA1 IL10 CD40LG FASLG HLA-DQB1 CD28 HLA-DPB1 HLA-DMA CD40 HLA-E IL12A FAS HLA-B HLA-DOA CD80 HLA-DQA2 HLA-C	c2.cp
KEGG_GRAFT_VERSUS_HOST_DISEASE	0.000166279	0.00205808	0.767285	2.18302	0	31	IL6 HLA-DRA CD86 HLA-G HLA-DMB HLA-DRB1 TNF HLA-DRB5 HLA-DQA1 IL1B HLA-DPA1 FASLG HLA-DQB1 CD28 HLA-DPB1 HLA-DMA HLA-E FAS HLA-B HLA-DOA CD80 HLA-DQA2 HLA-C	c2.cp
KEGG_PRIMARY_IMMUNODEFICIENCY	0.000164096	0.00205808	0.677837	1.96193	0	34	CD3E PTPRC IGLL1 IL2RG CD79A LCK CD40LG CD4 BTK CD40 UNG BLNK CD3D TAP1 CIITA IL7R ADA RAG2	c2.cp
BIOCARTA_ALK_PATHWAY	0.000163747	0.00205808	0.687408	1.99919	0	35	BMP5 NKX2-5 GATA4 BMP4 TGFBR3 SMAD6 TGFB1 TGFBR2 TGFB2 FZD1 TGFB3 BMPR1A SMAD5 TGFBR1 SMAD4 BMP7	c2.cp
BIOCARTA_COMP_PATHWAY	0.000179727	0.00205808	0.840086	2.06773	0	16	C7 C1QB C1QA C4B C1QC CFB C1R C4A C1S C6 C3 CFD C2	c2.cp
BIOCARTA_INFLAM_PATHWAY	0.000171204	0.00205808	0.74845	2.00244	0	23	CSF3 IL6 LTA HLA-DRA HLA-DRB1 TNF TGFB1 CSF1 IL10 CD4 IL12A TGFB2 TGFB3 IL7 IL15	c2.cp
BIOCARTA_DC_PATHWAY	0.000176803	0.00205808	0.781751	1.9788	0	18	TLR2 ANPEP CD2 TLR7 CD7 IL10 CD33 TLR4 CD40 IL12A	c2.cp
BIOCARTA_TOB1_PATHWAY	0.000178348	0.00205808	0.800125	1.99748	0	17	CD3E TGFBR3 TGFB1 IL2RA CD28 TGFBR2 TOB1 TGFB2 CD3D TGFB3 TGFBR1 SMAD4 TOB2	c2.cp
BIOCARTA_NKT_PATHWAY	0.000169405	0.00205808	0.73969	2.01798	0	25	CCR2 CXCR4 IL18R1 CCR5 IL4R CCR1 CCL3 TGFB1 CD40LG CD4 CD28 CCL4 IL12A TGFB2 IFNGR1 TGFB3	c2.cp
BIOCARTA_TH1TH2_PATHWAY	0.000178348	0.00205808	0.800466	1.99834	0	17	IL18 IL18R1 HLA-DRA CD86 IL4R HLA-DRB1 IL2RA CD40LG CD28 CD40 IL12A IFNGR1	c2.cp
SIG_PIP3_SIGNALING_IN_B_LYMPHOCYTES	0.000163747	0.00205808	0.658327	1.91462	0	35	PITX2 PTPRC SYK DAPP1 BTK PIK3R5 CDKN2A ITPR2 LYN PLCG2 ITPR3 GAB1 VAV1	c2.cp
SA_MMP_CYTOKINE_CONNECTION	0.000180603	0.00205808	0.837102	2.02903	0	15	SELL FCGR3A CD44 TNFRSF1A TNFRSF1B TNF IL1B TGFB1 CSF1 TNFRSF8 TGFB2 TNFSF8 IL6R	c2.cp
PID_SMAD2_3NUCLEAR_PATHWAY	0.000148566	0.00205808	0.666753	2.23962	0	80	NKX2-5 FOXH1 IGHA1 COL1A2 GATA3 CDK2 CDKN1A RUNX1 IRF7 RUNX3 TGIF1 MYC IL10 FOS SERPINE1 CEBPB FOXO1 CBFB TGIF2 SP1 CDKN2B HDAC1 ITGB5 SMAD4 E2F5 FOXO4 RUNX2 KAT2B RBL1 ATF3 LAMC1 SAP30 TCF3 JUN CDK4 MAX SKIL SMAD7 SP3	c2.cp
PID_INTEGRIN1_PATHWAY	0.000152439	0.00205808	0.657325	2.13305	0	63	F13A1 COL1A1 COL2A1 COL1A2 CD14 NID1 VCAM1 ITGA10 COL6A2 COL6A3 COL4A6 ITGA5 SPP1 COL3A1 PLAUR ITGA1 LAMB2 TGFBI NPNT TGM2 VEGFA ITGB1 PLAU FN1 LAMA2 ITGA6 ITGAV CSPG4 THBS1 JAM2 LAMA3 COL5A1 MDK LAMC1 COL4A4	c2.cp
PID_IL4_2PATHWAY	0.00015328	0.00205808	0.723076	2.33291	0	61	IGHG1 CCL26 SOCS3 COL1A1 FCER2 COL1A2 TFF3 LTA IL2RG IL4R DOK2 BCL6 PIGR CCL17 IL10 CD40LG ARG1 IL13RA1 CEBPB SPI1 PTPN6 INPP5D STAT5A FES SELP SP1	c2.cp
PID_IL12_2PATHWAY	0.00015328	0.00205808	0.659702	2.12845	0	61	IL18 CD3E GADD45B IL18R1 IL18RAP CCR5 HLA-DRA IL2RG NFKB2 IL1R1 HLA-DRB1 CCL3 LCK IL1B IL2RA GADD45G FASLG FOS CD4 CCL4 HLX RELA STAT5A IL12A B2M CD3D	c2.cp
PID_FRA_PATHWAY	0.000164096	0.00205808	0.777633	2.25078	0	34	MMP9 CCL2 COL1A2 IL6 DCN LIF MGP FOSL1 GJA1 HMOX1 NOS3 PLAUR ITGB4 CCNA2 JUNB NFATC2 FOSL2 THBD CDKN2A SP1 NFATC1 PLAU MMP2	c2.cp
PID_ANGIOPOIETIN_RECEPTOR_PATHWAY	0.000156177	0.00205808	0.645313	2.01295	0	50	AGTR1 ANGPT2 CDKN1A DOK2 TNF ANGPT1 FGF2 NOS3 ITGA5 ELF1 FOXO1 RELA STAT5A TNIP2 FES PXN GRB14 ITGB1 FN1 BMX MMP2 ELK1	c2.cp
PID_CXCR4_PATHWAY	0.000144342	0.00205808	0.566872	1.97349	0	100	MMP9 RGS1 CD3E CXCR4 PTPRC HLA-DRA ITGA10 FGR HLA-DRB1 LCK HCK ITGA5 ITGA1 CD4 PIK3R5 FOXO1 PTPN6 INPP5D STAT5A GNA13 YES1 RHOC PXN CD3D LYN ITGB1 PLCB3 ITGA6 ITGAV PIK3CG RAP1B VAV1 STAT3	c2.cp
PID_P53_DOWNSTREAM_PATHWAY	0.000137306	0.00205808	0.624378	2.25899	0	132	POU4F2 FOXA1 BCL2A1 POU4F1 TP63 TNFRSF10D DDIT4 LIF EPHA2 GDF15 CDKN1A PERP SFN HGF CASP1 TNFRSF10A DUSP1 TNFRSF10C BCL6 SPP1 SERPINE1 PYCARD IGFBP3 EGFR TP53I3 TNFRSF10B CAV1 VCAN BTG2 CASP6 FAS SH2D1A TP53INP1 HIC1 SNAI2 RNF144B TP53BP2 PMAIP1 CCNG1 MCL1 SP1 GADD45A RPS27L TAP1 BCL2 IRF5 STEAP3 MMP2 SESN1 NDRG1	c2.cp
PID_AMB2_NEUTROPHILS_PATHWAY	0.00016	0.00205808	0.672725	2.01164	0	40	MMP9 IL6 FGR ICAM1 ITGB2 TNF LCK HCK PLAUR CTGF ITGAM YES1 SELP LYN ROCK1 PLAU RAP1A MMP2 JAM2 SELPLG RAP1B TLN1 NFKB1 APOB	c2.cp
PID_AP1_PATHWAY	0.000152277	0.00205808	0.645123	2.09785	0	64	MMP9 CCL2 COL1A2 MT2A IL6 TIMP1 FOSL1 EDN1 GJA1 DUSP1 TGFB1 MYC IL10 FOS ELF1 JUNB NFATC2 FOSL2 MAF GATA2 CBFB CDKN2A SP1 BCL2L11 CYR61 FABP4 NFATC1 PLAU	c2.cp
PID_UPA_UPAR_PATHWAY	0.000162734	0.00205808	0.744264	2.17836	0	36	MMP9 FPR1 FPR2 PDGFD HGF ITGB2 TGFB1 ITGA5 PLAUR SERPINE1 EGFR PDGFRB ITGAM MMP3 FPR3 ITGB1 PLAU FN1 ITGB5 ITGAV	c2.cp
PID_IL6_7_PATHWAY	0.000157332	0.00205808	0.640149	1.9625	0	45	SOCS3 LBP CEBPD IL6 TIMP1 HCK MYC IRF1 FOS TNFSF11 JUNB CEBPB FOXO1 MCL1 IL6R GAB1 VAV1 STAT3	c2.cp
PID_IL23_PATHWAY	0.00016592	0.00205808	0.719615	2.05704	0	32	CCL2 CXCL1 SOCS3 IL18 CD3E IL18R1 IL6 IL18RAP NFKBIA TNF IL1B CD4 RELA STAT5A	c2.cp
PID_MYC_REPRESS_PATHWAY	0.00015328	0.00205808	0.661444	2.13407	0	61	COL1A2 CEBPD SLC11A1 CDKN1A ZFP36L1 IRF8 S100A7 MYC ITGB4 SPI1 PDGFRB CCL5 DNTT ERBB2 SP1 CDKN2B TJP2 CLU GADD45A ITGB1 BCL2 HDAC1 ITGA6 SMAD4 NDRG1 RBL1 DKK1 GFI1 CFLAR DDIT3 CCND1 ALDH9A1 MAX CDKN1B	c2.cp
PID_ANTHRAX_PATHWAY	0.000178348	0.00205808	0.789779	1.97165	0	17	IL18 VCAM1 CASP1 TNF PGR IL1B ANTXR2	c2.cp
REACTOME_TRANSLATION	0.000134409	0.00205808	0.568983	2.09801	0	155	EIF4EBP1 RPL26P30 RPL10P9 TRAM1 RPS15P5 RPL34 RPLP1 RPL21 RPL27A RPL36 RPLP2 RPS15A RPS6 RPS26 RPS8 RPL39 EIF3FP3 RPS27 RPS17 RPL35 RPL35A RPS28 RPL11 RPL13A RPL30 RPS3A EEF1D RPL23 RPS13 RPS24 RPS3 RPL9 RPL23A RPL13 EIF3E RPS12 RPL17 RPL27 RPS16 RPL38 RPS21 RPS18 RPL5 RPS25 RPL18 RPL24 RPL18A EEF1A1 RPL23AP42 RPL36A RPS11 RPL12 RPL21P16 SEC11A RPS29 RPL28 RPL8 RPL32 RPS14 RPS19 RPS20 RPS27A RPS4…	c2.cp
REACTOME_FORMATION_OF_THE_TERNARY_COMPLEX_AND_SUBSEQUENTLY_THE_43S_COMPLEX	0.000154751	0.00205808	0.646377	2.03965	0	53	RPS15P5 RPS15A RPS6 RPS26 RPS8 EIF3FP3 RPS27 RPS17 RPS28 RPS3A RPS13 RPS24 RPS3 EIF3E RPS12 RPS16 RPS21 RPS18 RPS25 RPS11 RPS29 RPS14 RPS19 RPS20 RPS27A RPS4X RPS7 RPS2 RPS10 RPSAP9 RPS9 FAU RPSA RPS5 RPS15 RPS4Y1 RPS23 EIF3G	c2.cp
REACTOME_IMMUNOREGULATORY_INTERACTIONS_BETWEEN_A_LYMPHOID_AND_A_NON_LYMPHOID_CELL	0.000153681	0.00205808	0.664447	2.11031	0	55	FCGR2B CD3E VCAM1 SELL LILRB5 FCGR3A ICAM1 IFITM1 HLA-G TYROBP LILRB3 ITGB2 ICAM2 HCST LILRB2 CD160 CD34 CD40LG C3 LILRB1 ICAM3 ITGAL CDH1 CD40 B2M CD3D HLA-B ITGB1 RAET1E LILRB4	c2.cp
REACTOME_SRP_DEPENDENT_COTRANSLATIONAL_PROTEIN_TARGETING_TO_MEMBRANE	0.000140667	0.00205808	0.648118	2.30401	0	116	RPL26P30 RPL10P9 TRAM1 RPS15P5 RPL34 RPLP1 RPL21 RPL27A RPL36 RPLP2 RPS15A RPS6 RPS26 RPS8 RPL39 RPS27 RPS17 RPL35 RPL35A RPS28 RPL11 RPL13A RPL30 RPS3A RPL23 RPS13 RPS24 RPS3 RPL9 RPL23A RPL13 RPS12 RPL17 RPL27 RPS16 RPL38 RPS21 RPS18 RPL5 RPS25 RPL18 RPL24 RPL18A RPL23AP42 RPL36A RPS11 RPL12 RPL21P16 SEC11A RPS29 RPL28 RPL8 RPL32 RPS14 RPS19 RPS20 RPS27A RPS4X RPL19 RPL4 RPS7 RPL26 RPS2 RPS10 R…	c2.cp
REACTOME_YAP1_AND_WWTR1_TAZ_STIMULATED_GENE_EXPRESSION	0.000171204	0.00205808	0.743001	1.98786	0	23	TBX5 TEAD2 YAP1 WWTR1 TEAD4 TEAD3 CTGF PPARA TEAD1 RUNX2 KAT2B RXRA TBL1X	c2.cp
REACTOME_CELL_SURFACE_INTERACTIONS_AT_THE_VASCULAR_WALL	0.000148302	0.00205808	0.649877	2.18699	0	81	CD48 COL1A1 TREM1 COL1A2 ANGPT2 FCER1G SELL CD2 ITGB2 DOK2 PECAM1 LCK ANGPT1 ITGA5 CD58 SLC7A7 SLC16A3 SLC7A9 MERTK CAV1 SLC16A1 PTPN6 ITGAM SLC7A11 PROS1 THBD YES1 SIRPG ITGAL ESAM GRB14 SELP LYN ITGB1 FN1 ITGAV SLC3A2 JAM2 F11R	c2.cp
REACTOME_KERATAN_SULFATE_KERATIN_METABOLISM	0.000168322	0.00205808	0.690301	1.92442	0	28	OGN OMD FMOD PRELP B4GALT1 KERA B4GALT4 LUM	c2.cp
REACTOME_GLYCOSAMINOGLYCAN_METABOLISM	0.00014374	0.00205808	0.528996	1.85338	0	105	OGN OMD LYVE1 FMOD DCN PRELP GPC3 CD44 B4GALT1 CHST3 DSE GPC6 KERA SDC2 HYAL2 HS3ST3A1 CHSY1 GPC4 VCAN HS3ST3B1 CHST14 HYAL1 B4GALT4 LUM BGN CSPG4 CHST9 CHST11 SDC4 HSPG2 B3GAT2	c2.cp
REACTOME_ACTIVATION_OF_THE_MRNA_UPON_BINDING_OF_THE_CAP_BINDING_COMPLEX_AND_EIFS_AND_SUBSEQUENT_BINDING_TO_43S	0.00015328	0.00205808	0.621076	2.00383	0	61	EIF4EBP1 RPS15P5 RPS15A RPS6 RPS26 RPS8 EIF3FP3 RPS27 RPS17 RPS28 RPS3A RPS13 RPS24 RPS3 EIF3E RPS12 RPS16 RPS21 RPS18 RPS25 RPS11 RPS29 RPS14 RPS19 RPS20 RPS27A RPS4X RPS7 RPS2 RPS10 RPSAP9 RPS9 FAU RPSA RPS5 PABPC1 RPS15 RPS4Y1 RPS23 EIF3G	c2.cp
REACTOME_PHOSPHORYLATION_OF_CD3_AND_TCR_ZETA_CHAINS	0.000180603	0.00205808	0.801808	1.94348	0	15	CD3E PTPRC HLA-DRB1 HLA-DRB5 LCK HLA-DQA1 HLA-DPA1 CD4 HLA-DPB1 CD3D	c2.cp
REACTOME_INTEGRIN_CELL_SURFACE_INTERACTIONS	0.000149499	0.00205808	0.61905	2.06095	0	75	COL1A1 COL2A1 COL1A2 VCAM1 ITGA10 ICAM1 SYK ITGB2 ICAM2 PECAM1 ITGA5 SPP1 ITGB4 ITGA1 LAMB2 ITGB8 VWF ICAM3 ITGAM ITGAL CDH1 APBB1IP ITGB1 FN1 ITGB5 LAMA2 RAP1A ITGAV THBS1 JAM2 F11R RAP1B LAMC1 TLN1 COL4A4 RAPGEF3 ITGA8 ITGA11 ITGB3 LAMA1 BSG SHC1 COL4A1 ITGB7	c2.cp
REACTOME_PEPTIDE_CHAIN_ELONGATION	0.000145582	0.00205808	0.699711	2.4151	0	94	RPL26P30 RPL10P9 RPS15P5 RPL34 RPLP1 RPL21 RPL27A RPL36 RPLP2 RPS15A RPS6 RPS26 RPS8 RPL39 RPS27 RPS17 RPL35 RPL35A RPS28 RPL11 RPL13A RPL30 RPS3A RPL23 RPS13 RPS24 RPS3 RPL9 RPL23A RPL13 RPS12 RPL17 RPL27 RPS16 RPL38 RPS21 RPS18 RPL5 RPS25 RPL18 RPL24 RPL18A EEF1A1 RPL23AP42 RPL36A RPS11 RPL12 RPL21P16 RPS29 RPL28 RPL8 RPL32 RPS14 RPS19 RPS20 RPS27A RPS4X RPL19 RPL4 RPS7 RPL26 RPS2 RPS10 RPSAP9 …	c2.cp
REACTOME_CLASS_A1_RHODOPSIN_LIKE_RECEPTORS	0.000124938	0.00205808	0.423377	1.64279	0	253	PPBP CXCR1 PTGDR CCR2 CCL2 CXCL6 CXCR2 CXCL1 CCL20 PROKR1 AGTR1 GPR4 FPR1 PTGER2 FPR2 CXCR4 C3AR1 CXCL3 C5AR1 CCR5 CCR9 CXCL2 APLNR PTGFR HCAR2 CCR1 EDN1 CCL3 GPR65 CXCL5 FFAR2 ADORA3 ADRA2B S1PR3 CXCL13 OXTR MC5R CCL27 LHCGR CCL17 GNRH1 NPW CCL4 RGR ADORA2B P2RY14 GAL C3 CXCR6 ANXA1 F2RL1 CCL5 S1PR4 PTGER4 TACR3 FPR3 CXCL16 S1PR1 LPAR6 F2RL3 PTGER1 ADORA2A OXER1 GPR55 P2RY6 INSL5 F2R HRH4 XCL1 A…	c2.cp
REACTOME_CHEMOKINE_RECEPTORS_BIND_CHEMOKINES	0.000157332	0.00205808	0.761785	2.3354	0	45	PPBP CXCR1 CCR2 CCL2 CXCL6 CXCR2 CXCL1 CCL20 CXCR4 CXCL3 CCR5 CCR9 CXCL2 CCR1 CCL3 CXCL5 CXCL13 CCL27 CCL17 CCL4 CXCR6 CCL5 CXCL16	c2.cp
REACTOME_3_UTR_MEDIATED_TRANSLATIONAL_REGULATION	0.000141064	0.00205808	0.6555	2.32645	0	115	RPL26P30 RPL10P9 RPS15P5 RPL34 RPLP1 RPL21 RPL27A RPL36 RPLP2 RPS15A RPS6 RPS26 RPS8 RPL39 EIF3FP3 RPS27 RPS17 RPL35 RPL35A RPS28 RPL11 RPL13A RPL30 RPS3A RPL23 RPS13 RPS24 RPS3 RPL9 RPL23A RPL13 EIF3E RPS12 RPL17 RPL27 RPS16 RPL38 RPS21 RPS18 RPL5 RPS25 RPL18 RPL24 RPL18A RPL23AP42 RPL36A RPS11 RPL12 RPL21P16 RPS29 RPL28 RPL8 RPL32 RPS14 RPS19 RPS20 RPS27A RPS4X RPL19 RPL4 RPS7 RPL26 RPS2 RPS10 …	c2.cp
REACTOME_G_ALPHA_I_SIGNALLING_EVENTS	0.000133583	0.00205808	0.472269	1.75534	0	167	PPBP CXCR1 CCR2 RGS1 CXCL6 CXCR2 CXCL1 CCL20 FPR1 FPR2 CXCR4 C3AR1 CXCL3 C5AR1 RGS18 CCR5 CCR9 CXCL2 APLNR HCAR2 CCR1 CXCL5 ADORA3 ADRA2B S1PR3 CXCL13 CCL27 GNG11 GNAT1 GNG12 NPW GNG5 RGR P2RY14 GAL C3 CXCR6 ANXA1 CCL5 S1PR4 FPR3 CXCL16 S1PR1 OXER1 GPR55 INSL5 HRH4	c2.cp
REACTOME_PD1_SIGNALING	0.000178348	0.00205808	0.797874	1.99186	0	17	CD3E HLA-DRB1 HLA-DRB5 LCK HLA-DQA1 HLA-DPA1 CD4 HLA-DPB1 PTPN6 PDCD1LG2 CD3D PDCD1	c2.cp
REACTOME_METABOLISM_OF_MRNA	0.000127894	0.00205808	0.536067	2.0488	0	217	HSPB1 ZFP36 HSPA1B ZFP36L1 RPL26P30 RPL10P9 MAPKAPK2 RPS15P5 RPL34 RPLP1 RPL21 RPL27A PSMB8 RPL36 RPLP2 RPS15A RPS6 RPS26 RPS8 RPL39 RPS27 RPS17 RPL35 RPL35A RPS28 LSM6 RPL11 RPL13A RPL30 RPS3A RPL23 RPS13 RPS24 RPS3 RPL9 RPL23A RPL13 XRN1 RPS12 RPL17 PSMB9 RPL27 RPS16 RPL38 RPS21 RPS18 RPL5 RPS25 RPL18 RPL24 RPL18A RPL23AP42 RPL36A RPS11 RPL12 RPL21P16 RPS29 RPL28 RPL8 RPL32 RPS14 RPS19 RPS20 RP…	c2.cp
REACTOME_METABOLISM_OF_RNA	0.000124146	0.00205808	0.480557	1.87072	0	261	HSPB1 ZFP36 HSPA1B ZFP36L1 RPL26P30 RPL10P9 MAPKAPK2 RPS15P5 RPL34 RPLP1 RPL21 RPL27A PSMB8 RPL36 RPLP2 RPS15A RPS6 RPS26 RPS8 RPL39 RPS27 RPS17 RPL35 RPL35A RPS28 LSM6 RPL11 RPL13A RPL30 RPS3A RPL23 RPS13 RPS24 RPS3 RPL9 RPL23A RPL13 XRN1 RPS12 RPL17 PSMB9 RPL27 RPS16 RPL38 RPS21 RPS18 RPL5 RPS25 RPL18 RPL24 RPL18A RPL23AP42 RPL36A RPS11 RPL12 RPL21P16 RPS29 RPL28 RPL8 RPL32 RPS14 RPS19 RPS20 RP…	c2.cp
REACTOME_GPCR_LIGAND_BINDING	0.000119374	0.00205808	0.406299	1.61659	0	340	PPBP CXCR1 PTGDR CCR2 CCL2 CXCL6 CXCR2 CXCL1 CCL20 PROKR1 CALCA AGTR1 GPR4 WNT6 FPR1 PTGER2 FPR2 GCGR CXCR4 C3AR1 CXCL3 C5AR1 ADM CCR5 CCR9 CXCL2 APLNR FZD2 PTGFR HCAR2 CCR1 EDN1 CCL3 GPR65 SCT CXCL5 FFAR2 ADORA3 ADRA2B S1PR3 CXCL13 OXTR MC5R CCL27 LHCGR CCL17 GNG11 GNRH1 GNG12 FZD9 NPW CCL4 GNG5 RGR ADORA2B GLP1R P2RY14 GAL WNT16 C3 CXCR6 ANXA1 PTH1R F2RL1 IHH CCL5 S1PR4 PTGER4 TACR3 RAMP1 FPR3 …	c2.cp
REACTOME_DEPOSITION_OF_NEW_CENPA_CONTAINING_NUCLEOSOMES_AT_THE_CENTROMERE	0.000157704	0.00205808	0.644953	1.98218	0	46	HIST1H2AD HIST2H2AA3 HIST1H2AE HIST1H2BH HIST1H2BD HIST1H2BF HIST1H4C HIST1H2AC HIST1H2BJ HIST2H2AA4 HIST1H4E CENPA HIST2H2BE HIST1H4H HIST1H2BG HIST2H4B HIST1H4I HIST2H4A H2AFZ HIST2H2AC	c2.cp
REACTOME_SIGNALING_BY_ILS	0.000143988	0.00205808	0.581554	2.03199	0	103	IL1R2 SOCS3 IL18 IL6 IL1RN NOD2 IL2RG IRAK3 NFKB2 IL1R1 HGF SYK CASP1 MAP3K8 LCK HCK IL1B IL2RA CSF2RB RELA PTPN6 STAT5A TEC TNIP2 YES1 MYD88 CSF2RA BLNK IL3RA LYN IL6R IL7R TAB2 INPPL1 IL7 VAV1 STAT3 PELI2 IRAK4 RIPK2 PELI1	c2.cp
REACTOME_RNA_POL_I_PROMOTER_OPENING	0.00016	0.00205808	0.678951	2.03026	0	40	HIST1H2AD HIST2H2AA3 HIST1H3H HIST1H2AE HIST1H2BH HIST1H2BD HIST1H2BF HIST1H4C HIST1H2AC HIST1H3D HIST1H2BJ HIST2H2AA4 HIST1H4E HIST2H2BE HIST1H3E HIST1H4H HIST1H2BG HIST2H4B H3F3A HIST1H4I HIST2H4A H2AFZ HIST2H2AC	c2.cp
REACTOME_INTERFERON_GAMMA_SIGNALING	0.000153468	0.00205808	0.651465	2.08924	0	59	SOCS3 MT2A VCAM1 FCGR1A ICAM1 CD44 IRF8 HLA-G HLA-DRB1 HLA-DRB5 IRF7 HLA-DQA1 GBP2 IRF1 HLA-DPA1 FCGR1B SP100 HLA-DPB1 PTPN6 B2M IFNGR1 HLA-B CIITA IRF5 PTAFR GBP1 IRF2 SOCS1 IRF4 HLA-DQA2 HLA-C PML JAK2 HLA-F IRF3	c2.cp
REACTOME_INTERFERON_SIGNALING	0.000135833	0.00205808	0.499422	1.82637	0	144	SOCS3 IFNA2 MT2A VCAM1 IFITM2 FCGR1A IFITM3 ICAM1 CD44 IFITM1 IRF8 HLA-G HLA-DRB1 HLA-DRB5 IRF7 HLA-DQA1 GBP2 IRF1 HLA-DPA1 FCGR1B SP100 HLA-DPB1 PTPN6 B2M HERC5 IFNGR1 HLA-B PSMB8 CIITA IRF5 PTAFR GBP1 ISG20 IRF2 SOCS1 IRF4 IFI27 HLA-DQA2 HLA-C RPS27A PML	c2.cp
REACTOME_MEIOTIC_RECOMBINATION	0.000153586	0.00205808	0.62075	1.99632	0	60	HIST1H2AD HIST2H2AA3 CDK2 HIST1H3H HIST1H2AE HIST1H2BH HIST1H2BD HIST1H2BF HIST1H4C HIST1H2AC HIST1H3D HIST1H2BJ TEX15 HIST2H2AA4 HIST1H4E HIST2H2BE HIST1H3E HIST1H4H HIST1H2BG HIST2H4B H3F3A HIST1H4I MSH4 HIST2H4A H2AFZ HIST2H2AC	c2.cp
REACTOME_HEMOSTASIS	0.000116077	0.00205808	0.462142	1.87049	0	423	PPBP F13A1 CD48 NFE2 MMRN1 COL1A1 TREM1 GATA4 SERPINA1 COL1A2 IFNA2 ANGPT2 GATA3 SRGN MAFF FCER1G SELL TIMP1 CDK2 HIST1H3H CD2 FGR HGF SYK ITGB2 DOK2 PECAM1 F10 LCK WEE1 IRF7 ANGPT1 RAC2 SERPING1 ADRA2B HBG2 HIST1H3D TGFB1 NOS3 ITGA5 IRF1 PLAUR CD58 GNG11 SLC7A7 SLC16A3 SERPINE1 SERPINF2 GNG12 SLC7A9 ABCC4 DOCK2 GNG5 HBB PIK3R5 MERTK CAV1 PLEK VWF SLC16A1 PTPN6 F5 ITGAM SLC7A11 GNA13 CFD PROS1 OR…	c2.cp
REACTOME_INFLUENZA_LIFE_CYCLE	0.000135667	0.00205808	0.589255	2.15394	0	143	HSPA1B RPL26P30 RPL10P9 RPS15P5 RPL34 RPLP1 RPL21 RPL27A RPL36 RPLP2 RPS15A RPS6 RPS26 RPS8 RPL39 RPS27 RPS17 RPL35 RPL35A RPS28 RPL11 RPL13A RPL30 RPS3A RPL23 RPS13 RPS24 RPS3 RPL9 RPL23A RPL13 RPS12 RPL17 RPL27 RPS16 RPL38 RPS21 RPS18 RPL5 POLR2J RPS25 RPL18 RPL24 RPL18A RPL23AP42 RPL36A RPS11 RPL12 RPL21P16 RPS29 RPL28 RPL8 RPL32 RPS14 RPS19 RPS20 RPS27A RPS4X RPL19 RPL4 RPS7 RPL26 RPS2 RPS10 …	c2.cp
REACTOME_INFLUENZA_VIRAL_RNA_TRANSCRIPTION_AND_REPLICATION	0.000142816	0.00205808	0.662098	2.33475	0	110	RPL26P30 RPL10P9 RPS15P5 RPL34 RPLP1 RPL21 RPL27A RPL36 RPLP2 RPS15A RPS6 RPS26 RPS8 RPL39 RPS27 RPS17 RPL35 RPL35A RPS28 RPL11 RPL13A RPL30 RPS3A RPL23 RPS13 RPS24 RPS3 RPL9 RPL23A RPL13 RPS12 RPL17 RPL27 RPS16 RPL38 RPS21 RPS18 RPL5 POLR2J RPS25 RPL18 RPL24 RPL18A RPL23AP42 RPL36A RPS11 RPL12 RPL21P16 RPS29 RPL28 RPL8 RPL32 RPS14 RPS19 RPS20 RPS27A RPS4X RPL19 RPL4 RPS7 RPL26 RPS2 RPS10 RPSAP9 …	c2.cp
REACTOME_INNATE_IMMUNE_SYSTEM	0.000127894	0.00205808	0.565099	2.15976	0	217	S100A12 DEFB1 CCR2 TLR8 C7 LBP CFH IFNA2 TLR2 CD14 C1QB C1QA CASP4 CR1 NOD2 C1QC TNFAIP3 LY96 TLR5 NFKBIA IRAK3 CFI NFKB2 CASP1 CFB CTSS TXNIP CD180 IRF7 TLR7 TLR1 AIM2 C4A IRF1 C1S LY86 FOS CD4 PYCARD BTK C6 BIRC3 TLR6 TLR4 LGALS3 C3 RELA CTSK CFD PROS1 P2RX7 PRSS2 C2 MYD88 RNF135 MAPKAPK2 HERC5 CD55 TLR10 DEFA5 ATF1 PLCG2 RIPK3 BCL2 TLR3 TAB2 UNC93B1 NLRC5 TICAM2 ELK1 SIGIRR MAP3K1 CARD9 IRF2 P…	c2.cp
REACTOME_COMPLEMENT_CASCADE	0.000170184	0.00205808	0.796849	2.15539	0	24	C7 CFH C1QB C1QA CR1 C1QC CFI CFB C4A C1S C6 C3 CFD PROS1 C2 CD55	c2.cp
REACTOME_TOLL_RECEPTOR_CASCADES	0.000141503	0.00205808	0.526963	1.86628	0	113	S100A12 TLR8 LBP TLR2 CD14 NOD2 LY96 TLR5 NFKBIA IRAK3 NFKB2 CTSS CD180 IRF7 TLR7 TLR1 LY86 FOS BTK TLR6 TLR4 RELA CTSK MYD88 MAPKAPK2 TLR10 ATF1 PLCG2 TLR3 TAB2 UNC93B1 TICAM2 ELK1 SIGIRR MAP3K1 PPP2R1B PELI2 IRAK4 RIPK2 PELI1 RPS27A TLR9 MAP2K3 IKBKB IRF3 JUN NOD1	c2.cp
REACTOME_ADAPTIVE_IMMUNE_SYSTEM	0.00011343	0.00205808	0.411795	1.68547	0	493	FCGR2B SOCS3 MRC1 CD3E VCAM1 SELL FCGR1A PTPRC CDKN1A FYB LILRB5 CD86 FCGR3A ICAM1 NFKBIA NCF2 CD79A IFITM1 HLA-G HLA-DMB NCF4 TYROBP SYK LILRB3 ITGB2 HLA-DRB1 CYBA MAP3K8 HLA-DRB5 ICAM2 CTSS HCST LCK LILRB2 UBE2C HLA-DQA1 PIK3AP1 CD160 HLA-DPA1 CYBB CD74 CD34 GRAP2 CD40LG FCGR1B CD4 VASP CD28 BTK HLA-DPB1 HLA-DMA FOXO1 C3 MRC2 RELA LILRB1 PTPN6 SIPA1 ICAM3 TRIM63 CTSK ORAI1 DTX3L YES1 ITGAL CDH1…	c2.cp
REACTOME_CYTOKINE_SIGNALING_IN_IMMUNE_SYSTEM	0.000124969	0.00205808	0.531955	2.06055	0	247	IL1R2 SOCS3 IL18 IFNA2 MT2A IL6 IL1RN VCAM1 IFITM2 FCGR1A NOD2 IFITM3 IL2RG ICAM1 CD44 IFITM1 IRF8 HLA-G IRAK3 NFKB2 IL1R1 HGF SYK CISH CASP1 HLA-DRB1 MAP3K8 HLA-DRB5 LCK IRF7 HLA-DQA1 HCK IL1B GBP2 IRF1 IL2RA HLA-DPA1 CSF2RB FCGR1B SP100 HLA-DPB1 RELA PTPN6 STAT5A TEC TNIP2 YES1 MYD88 B2M CSF2RA HERC5 IFNGR1 BLNK IL3RA HLA-B LYN PSMB8 IL6R CIITA IRF5 PTAFR IL7R TAB2 GBP1 INPPL1 ISG20 IL7 IRF2 VA…	c2.cp
REACTOME_NONSENSE_MEDIATED_DECAY_ENHANCED_BY_THE_EXON_JUNCTION_COMPLEX	0.000141064	0.00205808	0.650694	2.3094	0	115	RPL26P30 RPL10P9 RPS15P5 RPL34 RPLP1 RPL21 RPL27A RPL36 RPLP2 RPS15A RPS6 RPS26 RPS8 RPL39 RPS27 RPS17 RPL35 RPL35A RPS28 RPL11 RPL13A RPL30 RPS3A RPL23 RPS13 RPS24 RPS3 RPL9 RPL23A RPL13 RPS12 RPL17 RPL27 RPS16 RPL38 RPS21 RPS18 RPL5 RPS25 RPL18 RPL24 RPL18A RPL23AP42 RPL36A RPS11 RPL12 RPL21P16 RPS29 RPL28 RPL8 RPL32 RPS14 RPS19 RPS20 RPS27A RPS4X RPL19 RPL4 RPS7 RPL26 RPS2 RPS10 RPSAP9 RPL10 R…	c2.cp
REACTOME_AMYLOIDS	0.000154751	0.00205808	0.659225	2.08019	0	53	HIST1H2AD LYZ CALCA HIST2H2AA3 HIST1H3H HIST1H2AE HIST1H2BH HIST1H2BD HIST1H2BF HIST1H4C HIST1H2AC TTR HIST1H3D HIST1H2BJ HIST2H2AA4 TGFBI HIST1H4E HIST2H2BE B2M GSN HIST1H3E HIST1H4H HIST1H2BG HIST2H4B H3F3A HIST1H4I HSPG2 HIST2H4A APOA1 H2AFZ HIST2H2AC	c2.cp
REACTOME_PACKAGING_OF_TELOMERE_ENDS	0.000164935	0.00205808	0.710083	2.04426	0	33	HIST1H2AD HIST2H2AA3 HIST1H2AE HIST1H2BH HIST1H2BD HIST1H2BF HIST1H4C HIST1H2AC HIST1H2BJ HIST2H2AA4 HIST1H4E HIST2H2BE HIST1H4H HIST1H2BG HIST2H4B HIST1H4I HIST2H4A H2AFZ HIST2H2AC	c2.cp
REACTOME_TELOMERE_MAINTENANCE	0.000153586	0.00205808	0.614198	1.97525	0	60	HIST1H2AD HIST2H2AA3 HIST1H2AE HIST1H2BH HIST1H2BD HIST1H2BF HIST1H4C HIST1H2AC HIST1H2BJ HIST2H2AA4 HIST1H4E HIST2H2BE DNA2 HIST1H4H HIST1H2BG HIST2H4B HIST1H4I POLD1 PCNA HIST2H4A H2AFZ POLA1 HIST2H2AC	c2.cp
REACTOME_PLATELET_ACTIVATION_SIGNALING_AND_AGGREGATION	0.000131579	0.00205808	0.444812	1.67551	0	192	PPBP F13A1 MMRN1 COL1A1 SERPINA1 COL1A2 SRGN FCER1G TIMP1 HGF SYK PECAM1 LCK RAC2 SERPING1 ADRA2B TGFB1 GNG11 SERPINE1 SERPINF2 GNG12 ABCC4 GNG5 PIK3R5 PLEK VWF F5 GNA13 CFD PROS1 TGFB2 F2RL3 SPARC VEGFA SELP APBB1IP CLU ITPR2 PRKCH F2R TGFB3 LYN PLCG2 ITPR3 GNA14 FN1 RAP1A PIK3CG THBS1 CD63 GNG8 LEFTY2 RAP1B VEGFC VAV1 GNA12 LAMP2 TLN1 APOA1	c2.cp
NABA_ECM_REGULATORS	0.000130976	0.00205808	0.506058	1.90975	0	194	SLPI MMP9 MMP8 FAM20A F13A1 SERPIND1 SERPINA3 SERPINA5 CST7 CSTA SERPINA1 SERPINH1 TIMP1 MMP19 ADAMTS9 A2ML1 ADAMTS2 MMP14 CTSS F10 CPAMD8 ADAM28 SERPING1 P4HA1 HTRA3 ADAM33 ITIH2 TIMP3 SERPINE1 ADAMTS1 SERPINF2 PLOD2 MEP1A HYAL2 ADAMTS12 SERPINB1 PCSK5 CTSK MMP21 TGM2 MMP3 PRSS2 ADAMTSL3 ADAM12 SERPINC1 ADAMTSL4 MMP25 SERPINB6 HYAL1 P3H2 P4HA2 CTSC LOXL2 ITIH5 PLAU PLOD1 TGM4 MMP2	c2.cp
NABA_PROTEOGLYCANS	0.000166279	0.00205808	0.708437	2.01559	0	31	OGN OMD FMOD SRGN DCN PRG4 PRELP ESM1 OPTC KERA PODN VCAN LUM BGN HAPLN3 HSPG2	c2.cp
NABA_SECRETED_FACTORS	0.00012279	0.00205808	0.564534	2.2105	0	281	S100A12 BMP5 CCL26 PPBP S100A8 S100A9 S100P CCL2 CXCL6 IGF2 CXCL1 CCL20 CSF3 S100A4 IL18 AREG SFRP2 CXCL8 WNT6 IFNA2 ANGPT2 S100A10 BMP6 IL6 CXCL3 S100A11 LIF S100A3 LTA IL1RN BMP4 ANGPTL4 IL9 GDF15 WFIKKN2 CXCL2 FRZB PDGFD EBI3 HGF S100A7 TNF FGF23 CCL3 PGF ANGPT1 CXCL5 ANGPTL5 FGF2 FLG2 IL1B CXCL13 TGFB1 CSF1 CCL27 CCL17 OSM IL10 FASLG TNFSF11 CCL4 CTF1 WNT16 S100A6 FSTL1 FGF11 IHH EPO CCL5 EGF…	c2.cp
NABA_CORE_MATRISOME	0.000124425	0.00205808	0.470772	1.83057	0	258	OGN OMD EGFLAM MFAP2 MMRN1 COL1A1 FGL2 COL2A1 SRPX2 FMOD COL1A2 WISP1 OIT3 ECM2 SRGN DCN NID1 MGP PCOLCE PRG4 LRG1 THSD4 MFAP5 PRELP ESM1 COL6A2 COL6A3 OPTC TINAGL1 AEBP1 NDNF FBLN1 KERA COL8A2 ABI3BP COL4A6 PODN SPP1 COL3A1 IGFBP5 EMILIN2 TSKU LAMB2 IGFBP3 MFAP4 TGFBI VWF CTGF SRPX FGL1 CRISPLD2 VCAN LTBP2 NPNT CILP OTOG PCOLCE2 EFEMP1 COL8A1 SMOC1 MMRN2 FBLN5 SPARC EMILIN1 ZP1 CYR61 TNFAIP6 MAT…	c2.cp
NABA_ECM_GLYCOPROTEINS	0.000262812	0.00296235	0.437962	1.64383	1	183	EGFLAM MFAP2 MMRN1 FGL2 SRPX2 WISP1 OIT3 ECM2 NID1 MGP PCOLCE LRG1 THSD4 MFAP5 TINAGL1 AEBP1 NDNF FBLN1 ABI3BP SPP1 IGFBP5 EMILIN2 TSKU LAMB2 IGFBP3 MFAP4 TGFBI VWF CTGF SRPX FGL1 CRISPLD2 LTBP2 NPNT CILP OTOG PCOLCE2 EFEMP1 SMOC1 MMRN2 FBLN5 SPARC EMILIN1 ZP1 CYR61 TNFAIP6 MATN3 NOV IGFBP6 IGFBP4 LAMB4 TECTB FN1 VWDE LAMA2 WISP3 EFEMP2 THBS1 LTBP1 SPON1 IGFBP7 PAPLN TSPEAR LAMA3 NID2 BGLAP	c2.cp
REACTOME_VOLTAGE_GATED_POTASSIUM_CHANNELS	0.000267594	0.00298382	-0.668041	-2.21718	0	41	KCNH1 KCNH4 KCNH7 KCNG2 KCNA3 KCNC3 KCNS2 KCNA1 KCNV2 KCNQ5 KCNA2 KCNF1 KCNQ3 KCNV1 KCND1 KCNQ2 KCNH8 KCNB1 KCNAB3 KCNQ4 KCNH2 KCNC1 KCNB2 KCNH3 KCNAB2 KCNA4 KCNAB1 KCNG3	c2.cp
REACTOME_MEIOSIS	0.000294161	0.00324516	0.557345	1.90126	1	88	HIST1H2AD HIST2H2AA3 CDK2 HIST1H3H HIST1H2AE HIST1H2BH HIST1H2BD HIST1H2BF HIST1H4C HIST1H2AC HIST1H3D HIST1H2BJ TEX15 HIST2H2AA4 HIST1H4E HIST2H2BE HIST1H3E SYCP3 HIST1H4H HIST1H2BG SYNE2 HIST2H4B H3F3A HIST1H4I STAG2 STAG1 MSH4 HIST2H4A H2AFZ LMNA TEX12 HIST2H2AC LMNB1 HSPA2 CDK4 SUN2 RAD51 BLM HIST1H2BK H2AFX H3F3B SYCP2 HIST3H2BB ATM HIST1H2BC	c2.cp
PID_BCR_5PATHWAY	0.000304692	0.00325738	0.580674	1.89047	1	65	FCGR2B BCL2A1 PTPRC NFKBIA CD79A SYK DAPP1 PIK3AP1 FOS DOK1 BTK RELA PTPN6 INPP5D CD79B BLNK NFATC1 LYN PLCG2 ELK1 MAP3K1 MALT1 CD72 NFKB1 ETS1 IKBKB JUN	c2.cp
PID_HIF1_TFPATHWAY	0.000304692	0.00325738	0.593338	1.9317	1	65	TFF3 CP CXCR4 ADM HK2 ITGB2 EDN1 HMOX1 FOS PLIN2 SERPINE1 EPO GATA2 VEGFA MCL1 SP1 ABCB1 SLC2A1 SMAD4 NDRG1 EGLN3 ENG CA9 BHLHE41 EGLN1 ETS1 JUN NT5E PFKFB3 RORA HIF1A GCK ID2 HDAC7	c2.cp
REACTOME_RNA_POL_I_TRANSCRIPTION	0.000304692	0.00325738	0.584334	1.90238	1	65	HIST1H2AD HIST2H2AA3 HIST1H3H HIST1H2AE HIST1H2BH HIST1H2BD HIST1H2BF HIST1H4C HIST1H2AC HIST1H3D HIST1H2BJ HIST2H2AA4 HIST1H4E HIST2H2BE HIST1H3E HIST1H4H HIST1H2BG HIST2H4B H3F3A HIST1H4I PTRF KAT2B HIST2H4A H2AFZ HIST2H2AC	c2.cp
KEGG_PRION_DISEASES	0.000332557	0.00334098	0.675533	1.92198	1	31	C7 HSPA1A IL6 C1QB C1QA C1QC PRKX IL1B C6 CCL5	c2.cp
BIOCARTA_IL1R_PATHWAY	0.00033184	0.00334098	0.658319	1.88183	1	32	IL6 IL1RN NFKBIA IRAK3 IL1R1 TNF IL1B TGFB1 RELA TGFB2 MYD88 TGFB3 MAP3K1 NFKB1 MAP2K3 IKBKB JUN	c2.cp
PID_HIF2PATHWAY	0.00033184	0.00334098	0.656848	1.87762	1	32	TWIST1 KDR MMP14 FLT1 SERPINE1 EPO EFNA1 ADORA2A VEGFA SP1 SLC2A1 EIF3E ELK1 SIRT1 EGLN3 EGLN1 ETS1 POU5F1 EPAS1	c2.cp
PID_AVB3_OPN_PATHWAY	0.000332557	0.00334098	0.653754	1.86001	1	31	MMP9 CD44 NFKBIA SYK SPP1 FOS RELA GSN PLAU ITGAV MMP2 MAP3K1 VAV3 NFKB1 ITGB3 JUN RHOA ILK CHUK PIK3CA	c2.cp
PID_IL12_STAT4_PATHWAY	0.000332557	0.00334098	0.687195	1.95516	1	31	IL18 CD3E IL18R1 IL18RAP HLA-DRA CD86 HLA-DRB1 TGFB1 IRF1 IL2RA FOS CD4 CD28	c2.cp
REACTOME_AMINO_ACID_TRANSPORT_ACROSS_THE_PLASMA_MEMBRANE	0.000335064	0.00334098	0.670478	1.88629	1	29	SLC7A2 SLC38A4 SLC6A20 SLC1A5 SLC38A2 SLC7A7 SLC6A12 SLC7A9 SLC7A11 SLC43A1 SLC3A2	c2.cp
REACTOME_POTASSIUM_CHANNELS	0.000319183	0.00334098	-0.457336	-1.78194	0	94	KCNK17 KCNH1 KCNK18 KCNH4 KCNH7 KCNG2 KCNA3 KCNC3 KCNS2 KCNA1 KCNJ12 KCNV2 KCNK4 KCNQ5 KCNK9 KCNA2 ABCC8 KCNF1 HCN2 KCNK10 KCNQ3 KCNV1 KCND1 KCNQ2 KCNH8 KCNB1 KCNK3 KCNK1 KCNAB3 KCNQ4 GNG3 KCNH2 KCNC1 KCNJ9 KCNB2 KCNH3 HCN1 GABBR2 GABBR1 KCNAB2 KCNJ3 KCNA4 KCNAB1 KCNG3 KCNJ11 KCNC2 HCN4 GNG4	c2.cp
REACTOME_KERATAN_SULFATE_BIOSYNTHESIS	0.000340368	0.00336154	0.709715	1.9197	1	24	OGN OMD FMOD PRELP B4GALT1 KERA B4GALT4 LUM	c2.cp
REACTOME_NEUROTRANSMITTER_RECEPTOR_BINDING_AND_DOWNSTREAM_TRANSMISSION_IN_THE_POSTSYNAPTIC_CELL	0.000365631	0.00357697	-0.409919	-1.68796	0	133	GABRA6 CHRNB3 CHRNA6 CHRNA9 CHRNB2 CHRNA2 RASGRF1 CHRNA3 CAMK4 NCALD NEFL KCNJ12 ADCY1 GRIK3 GABRG3 CACNG2 NSF ADCY7 CHRND GRIN2B PRKCG GNG13 CALM3 GRIN1 PLCB1 GRIN2A ARHGEF9 DLG3 PRKCB ACTN2 CAMK2D CACNG3 GNG3 CHRNA4 KCNJ9 GABRB2 CACNG8 GABBR2 AKAP5 GABBR1 GRIK2 GABRA1 GABRA3 CALM1 GABRG2 KCNJ3 CAMK2B AP2A1 AP2M1 GRIA3 GRIK5 RASGRF2 GRIA4 GNG4 GNB5 GRIK1 MAPK1 GRIK4 ADCY6 EPB41L1 CAMK2A GABRB1 P…	c2.cp
REACTOME_SLC_MEDIATED_TRANSMEMBRANE_TRANSPORT	0.000380662	0.00368922	0.41404	1.58971	2	227	SLC26A7 SLC22A2 SLC22A8 SLC47A1 SLC6A3 SLC7A2 SLC22A6 SLC26A2 SLC38A4 SLC6A20 SLCO4A1 CP SLC11A1 SLC1A5 SLC14A1 SLC5A5 HK3 SLC38A2 HK2 SLC5A3 SLC2A5 SLC7A7 SLC22A3 SLC6A12 SLC16A3 SLC7A9 SLC1A3 SLC2A4 SLC9A2 SLC16A1 SLC1A7 SLC7A11 SLC26A3 SLC15A3 SLC15A2 SLCO1B1 SLC44A3 SLC2A10 SLC2A1 SLC12A7 SLC43A1 SLC3A2 HEPH SLC2A9 SLC30A1 SLC26A6 SLC2A12 SLC39A1	c2.cp
REACTOME_PEPTIDE_LIGAND_BINDING_RECEPTORS	0.000403226	0.00387171	0.447695	1.65079	2	155	PPBP CXCR1 CCR2 CCL2 CXCL6 CXCR2 CXCL1 CCL20 PROKR1 AGTR1 FPR1 FPR2 CXCR4 C3AR1 CXCL3 C5AR1 CCR5 CCR9 CXCL2 APLNR CCR1 EDN1 CCL3 CXCL5 CXCL13 OXTR MC5R CCL27 CCL17 NPW CCL4 GAL C3 CXCR6 ANXA1 F2RL1 CCL5 TACR3 FPR3 CXCL16 F2RL3 INSL5 F2R XCL1 EDNRB GAST GALR2 NMUR2	c2.cp
KEGG_APOPTOSIS	0.000443066	0.00419441	0.547731	1.85491	2	84	TNFRSF10D NFKBIA PRKX IRAK3 IL1R1 TNFRSF1A TNF TNFRSF10A IL1B TNFRSF10C CASP7 CSF2RB FASLG BIRC3 PIK3R5 RELA TNFRSF10B CAPN2 CASP6 FAS MYD88 IL3RA BCL2 NGF PIK3CG	c2.cp
KEGG_B_CELL_RECEPTOR_SIGNALING_PATHWAY	0.000448967	0.00419441	0.547936	1.82163	2	74	FCGR2B NFKBIA CD79A IFITM1 SYK DAPP1 LILRB3 RAC2 PIK3AP1 FOS NFATC4 BTK PIK3R5 RELA PTPN6 NFATC2 INPP5D CD79B BLNK NFATC1 LYN PLCG2 PIK3CG VAV1 MALT1 CD72 VAV3 NFKB1 IKBKB JUN NFATC3 CD81 BCL10 SOS2 CHUK CD22 PIK3CA	c2.cp
REACTOME_RESPONSE_TO_ELEVATED_PLATELET_CYTOSOLIC_CA2_	0.000447294	0.00419441	0.550767	1.83705	2	76	PPBP F13A1 MMRN1 SERPINA1 SRGN TIMP1 HGF PECAM1 SERPING1 TGFB1 SERPINE1 SERPINF2 ABCC4 PLEK VWF F5 CFD PROS1 TGFB2 SPARC VEGFA SELP CLU TGFB3 FN1 THBS1 CD63 LEFTY2 VEGFC LAMP2 TLN1 APOA1	c2.cp
REACTOME_INTERACTION_BETWEEN_L1_AND_ANKYRINS	0.000471476	0.00436536	-0.732901	-2.07994	1	21	SPTB SCN5A ANK1 SCN2B SPTBN2 SCN1B SCN8A SCN3B ANK3 SPTBN5 SCN2A KCNQ3 L1CAM KCNQ2 NRCAM SPTBN4 SPTAN1	c2.cp
KEGG_REGULATION_OF_ACTIN_CYTOSKELETON	0.000518471	0.00459533	0.410051	1.55606	3	202	INSRR SCIN CD14 ITGA10 PDGFD ITGB2 FGF23 FGF2 RAC2 IQGAP2 MYL12A EZR ITGA5 ITGB4 ITGA1 GNG12 ARPC1B EGFR PIK3R5 ITGB8 PDGFRB ITGAM FGF11 GNA13 ITGAL NCKAP1L PXN WAS FGF17 GSN RRAS DIAPH3 MRAS IQGAP1 MYLPF FGFR4 F2R ITGB1 MSN ROCK1 FN1 ITGB5 ITGA6 ITGAV ARHGEF6 PPP1CC PIK3CG LIMK2 WASF2 VAV1 RRAS2 GNA12 PDGFC VAV3 PDGFRA ITGA8 CYFIP1 PAK4 FGD3 ITGA11 ITGB3 DIAPH2 PFN4 PAK2 VCL ARAF ENAH TIAM2 FGF1…	c2.cp
BIOCARTA_CTCF_PATHWAY	0.000513611	0.00459533	0.721975	1.93161	2	23	TGFBR3 CD79A TGFB1 MYC TGFBR2 TGFB2 CD79B CDKN2A TGFB3 SMAD5 TGFBR1 PIK3CG SMAD4	c2.cp
PID_INTEGRIN_A9B1_PATHWAY	0.000517063	0.00459533	0.727278	1.92757	2	22	F13A1 VCAM1 SPP1 TGM2 PXN ADAM12 VEGFA CSF2RA KCNJ15 SAT1 ITGB1 FN1 VEGFC	c2.cp
PID_INTEGRIN2_PATHWAY	0.000507185	0.00459533	0.686476	1.88874	2	26	FCGR2A VCAM1 ICAM1 ITGB2 ICAM2 F10 PLAUR CD40LG TGFBI C3 ICAM3 ITGAM ITGAL CYR61 PLAU F11R	c2.cp
REACTOME_GENERATION_OF_SECOND_MESSENGER_MOLECULES	0.000507185	0.00459533	0.686948	1.89004	2	26	CD3E FYB HLA-DRB1 HLA-DRB5 LCK HLA-DQA1 HLA-DPA1 GRAP2 CD4 VASP HLA-DPB1 WAS CD3D HLA-DQA2 LCP2 PAK2 ENAH CD3G NCK1	c2.cp
REACTOME_NEURONAL_SYSTEM	0.000526593	0.00462777	-0.402521	-1.79409	0	268	GABRA6 SYT2 SLC5A7 KCNK17 KCNH1 CHRNB3 KCNK18 CHRNA6 KCNH4 KCNH7 CHRNA9 KCNG2 KCNA3 CHRNB2 SYN3 CHRNA2 RASGRF1 CHRNA3 KCNC3 CAMK4 SLC32A1 NCALD KCNS2 KCNA1 NEFL KCNJ12 VAMP1 STX1A ADCY1 KCNV2 GRIK3 GABRG3 SLC1A6 STX1B KCNK4 CACNA1A CACNG2 NSF SLC17A7 KCNQ5 ADCY7 KCNK9 CHRND KCNA2 GRIN2B ABCC8 KCNF1 CACNB1 GAD2 PRKCG HCN2 SYT1 SNAP25 KCNK10 GNG13 CALM3 GRIN1 RAB3A PLCB1 GRIN2A RIMS1 KCNQ3 GJD2 KCN…	c2.cp
BIOCARTA_HSP27_PATHWAY	0.00054181	0.00472148	0.776192	1.88139	2	15	HSPB1 TNF FASLG HSPB2 FAS MAPKAPK2 BCL2	c2.cp
KEGG_OLFACTORY_TRANSDUCTION	0.000585138	0.00505656	-0.499308	-1.82267	1	66	OR1F1 OR2T33 OR52A5 OR1E1 OR2M4 OR2T8 OR2L2 OR3A2 OR2W3 OR14I1 OR13C5 OR2K2 CALML3 OR5B12 OR2AG2 OR2T4 OR11H4 OR2A42 PDC CLCA2 GUCA1A OR11A1 OR1L8 CALM3	c2.cp
PID_FCER1_PATHWAY	0.000614345	0.00526509	0.580708	1.86755	3	60	FCGR2B FCER1A FCER1G HCLS1 SYK DUSP1 FOS DOK1 BTK LAT2 RELA NFATC2 INPP5D PXN S1PR1 SPHK1 PTPN13 LYN MAP3K1 VAV1 NFKB1 KLRG1 LCP2 IKBKB JUN PAK2	c2.cp
BIOCARTA_NFAT_PATHWAY	0.000624707	0.00528997	0.623553	1.94507	3	50	HAND1 NKX2-5 HAND2 GATA4 LIF EDN1 FGF2 NFATC4 CTF1 NFATC2	c2.cp
PID_PTP1B_PATHWAY	0.000627451	0.00528997	0.619317	1.92274	3	49	SOCS3 FCGR2A LEPR FGR LCK HCK CSF1 DOK1 CSF1R EGFR CAV1 PDGFRB STAT5A YES1 YBX1 LYN	c2.cp
PID_INTEGRIN3_PATHWAY	0.00064	0.00535226	0.618269	1.8488	3	40	COL1A1 COL1A2 KDR PECAM1 COL4A6 SPP1 PLAUR TGFBR2 TGFBI PDGFRB VEGFA SPHK1 CYR61 PLAU FN1 ITGAV SDC4 THBS1 F11R LAMC1 COL4A4	c2.cp
BIOCARTA_TOLL_PATHWAY	0.00064704	0.00536784	0.629974	1.85431	3	37	TLR2 CD14 LY96 NFKBIA TLR7 FOS TLR6 TLR4 RELA PPARA MYD88 TLR10 TLR3 TAB2 ELK1 MAP3K1 TLR9 NFKB1 MAP2K3 IKBKB JUN	c2.cp
PID_GLYPICAN_1PATHWAY	0.000674082	0.0055478	0.67808	1.87777	3	27	PLA2G2A FGR LCK FGF2 HCK FLT1 TGFB1 TGFBR2 YES1 TGFB2 SERPINC1 VEGFA TGFB3 LYN TGFBR1	c2.cp
PID_TOLL_ENDOGENOUS_PATHWAY	0.000680735	0.00555844	0.700733	1.8954	3	24	S100A8 S100A9 TLR2 CD14 LY96 TLR1 TLR6 TLR4 VCAN MYD88 TLR3 BGN	c2.cp
REACTOME_CHROMOSOME_MAINTENANCE	0.000720461	0.00583686	0.50679	1.76632	4	101	HIST1H2AD HIST2H2AA3 HIST1H2AE HIST1H2BH HIST1H2BD HIST1H2BF HIST1H4C HIST1H2AC HIST1H2BJ HIST2H2AA4 HIST1H4E CENPA HIST2H2BE DNA2 SYCP3 HIST1H4H HIST1H2BG SYNE2 HIST2H4B HIST1H4I STAG2 STAG1 POLD1 PCNA HIST2H4A H2AFZ POLA1 LMNA TEX12 HIST2H2AC LMNB1	c2.cp
KEGG_MAPK_SIGNALING_PATHWAY	0.000749813	0.00602756	0.386509	1.50012	5	254	IL1R2 PLA2G2A HSPA6 HSPB1 HSPA1A GADD45B CD14 HSPA1B PRKX NFKB2 IL1R1 TNFRSF1A MAP3K8 TNF FGF23 FGF2 DUSP1 IL1B RAC2 TGFB1 MYC RASGRP4 GADD45G FASLG FOS NFATC4 GNG12 TGFBR2 EGFR RELA PDGFRB NFATC2 FGF11 MKNK2 MECOM TGFB2 FAS MAPKAPK2 FGF17 RRAS MAP3K6 MRAS GADD45A FGFR4 TGFB3 TGFBR1 RAP1A TAB2 NGF CACNG6	c2.cp
PID_TXA2PATHWAY	0.000768403	0.00603662	0.576603	1.83131	4	55	PTGDR VCAM1 FGR ICAM1 SYK LCK HCK NOS3 EGFR PIK3R5 GNA13 YES1 TGM2 SELE PRKCH LYN ROCK1 GNA14 PRKG1 PIK3CG SLC9A3R1 GNA12	c2.cp
REACTOME_COSTIMULATION_BY_THE_CD28_FAMILY	0.000767931	0.00603662	0.573616	1.84474	4	60	CD3E CD86 HLA-DRB1 MAP3K8 HLA-DRB5 LCK HLA-DQA1 HLA-DPA1 GRAP2 CD4 CD28 HLA-DPB1 PTPN6 YES1 BTLA PDCD1LG2 CD3D LYN PDCD1 PPP2R1B VAV1 CD80	c2.cp
REACTOME_MEIOTIC_SYNAPSIS	0.000767106	0.00603662	0.606369	1.9318	4	56	HIST1H2AD HIST2H2AA3 HIST1H2AE HIST1H2BH HIST1H2BD HIST1H2BF HIST1H4C HIST1H2AC HIST1H2BJ HIST2H2AA4 HIST1H4E HIST2H2BE SYCP3 HIST1H4H HIST1H2BG SYNE2 HIST2H4B HIST1H4I STAG2 STAG1 HIST2H4A H2AFZ LMNA TEX12 HIST2H2AC LMNB1	c2.cp
PID_PI3KCI_PATHWAY	0.000784314	0.00611529	0.610381	1.89499	4	49	FGR SYK DAPP1 LCK HCK SGK1 BTK PIK3R5 INPP5D YES1 BLNK LYN PLCG2 RAP1A PIK3CG INPPL1	c2.cp
BIOCARTA_NTHI_PATHWAY	0.000856018	0.00662456	0.708453	1.89543	4	23	TLR2 NFKBIA TNF DUSP1 IL1B TGFBR2 RELA MYD88 TGFBR1 SMAD4 NFKB1 MAP2K3 IKBKB	c2.cp
PID_CMYB_PATHWAY	0.000888362	0.00682394	0.53252	1.80037	5	83	LYZ COL1A2 GATA3 CEBPD ANPEP CDKN1A TFEC HES1 MYC CD34 CD4 CSF1R BIRC3 CEBPB ADORA2B SPI1 MAF PIM1 CASP6 CDKN2A LEF1 SP1 IQGAP1 BCL2 TAB2 ADA	c2.cp
BIOCARTA_LAIR_PATHWAY	0.000898634	0.00685208	0.749811	1.84553	4	16	C7 IL6 VCAM1 ICAM1 ITGB2 TNF C6 C3 ITGAL SELP ITGB1 SELPLG	c2.cp
PID_INTEGRIN_CS_PATHWAY	0.00101437	0.00767812	0.663249	1.82484	5	26	ITGA10 ITGB2 ITGA5 ITGB4 ITGA1 ITGB8 ITGAM ITGAL ITGB1 ITGB5 ITGA6 ITGAV ITGA8 ITGA11 ITGB3 ITGA7 ITGB7	c2.cp
REACTOME_EXTRACELLULAR_MATRIX_ORGANIZATION	0.00104415	0.00784628	0.52887	1.77002	6	78	MMP9 MMP8 COL1A1 COL2A1 COL1A2 TPSAB1 SERPINH1 PCOLCE TIMP1 COL6A2 ADAMTS2 MMP14 COL6A3 COL8A2 COL4A6 COL3A1 PLOD2 MMP3 PRSS2 PCOLCE2 COL8A1	c2.cp
PID_INTEGRIN5_PATHWAY	0.00107009	0.00798334	0.743598	1.85637	5	17	VCAM1 PLAUR ITGB8 CYR61 PLAU FN1 ITGB5 TGFBR1 ITGAV	c2.cp
PID_SYNDECAN_1_PATHWAY	0.00110132	0.00815765	0.596715	1.82935	6	45	MMP9 COL1A1 COL2A1 COL1A2 COL6A2 HGF COL6A3 COL8A2 COL4A6 TGFB1 COL3A1 CCL5 COL8A1	c2.cp
KEGG_FC_GAMMA_R_MEDIATED_PHAGOCYTOSIS	0.00116431	0.00856307	0.507204	1.74859	7	93	FCGR2B FCGR2C SCIN FCGR2A FCGR1A PTPRC FCGR3A SYK HCK RAC2 VASP DOCK2 ARPC1B PIK3R5 INPP5D NCF1 WAS GSN SPHK1 LYN PLCG2 PIK3CG LIMK2 WASF2 MYO10 VAV1	c2.cp
NABA_ECM_AFFILIATED	0.001221	0.00891675	0.431401	1.58234	8	148	CLEC4D CLEC10A CLEC5A CLEC12A ANXA2 CLEC4E FCN3 CLEC2B C1QB C1QA CLEC1B ANXA3 C1QC CLEC7A GPC3 CD209 CLEC1A GPC6 SEMA3F FCN1 MUC1 CLEC2A SDC2 LGALS3 CLEC3B ANXA1 ANXA5 GPC4 MUC16 CLEC9A SEMA3D EMCN LGALS9 PLXDC2 CLEC18A SEMA3C CLEC4A CLEC18B CSPG4 CLEC17A SDC4 LGALS12 C1QTNF1 SFTPB	c2.cp
REACTOME_ANTIGEN_PROCESSING_CROSS_PRESENTATION	0.0013463	0.00975963	0.529875	1.75604	8	72	MRC1 FCGR1A NCF2 HLA-G NCF4 CYBA CTSS CYBB FCGR1B MRC2 B2M HLA-B TAP1 PSMB8 ITGB5 ITGAV PSMB9 HLA-C RPS27A PSME1	c2.cp
REACTOME_SMAD2_SMAD3_SMAD4_HETEROTRIMER_REGULATES_TRANSCRIPTION	0.00135524	0.00975963	0.671791	1.83274	7	25	WWTR1 TGIF1 MYC SERPINE1 JUNB TGIF2 SP1 CDKN2B HDAC1 SMAD4 E2F5 RBL1 RPS27A	c2.cp
PID_IL27_PATHWAY	0.00136963	0.00979521	0.692184	1.85191	7	23	IL18 GATA3 IL6 EBI3 TNF IL1B TGFB1 IL27 STAT5A IL12A	c2.cp
BIOCARTA_TID_PATHWAY	0.00141443	0.0100463	0.71566	1.81151	7	18	HSPA1A NFKBIA TNFRSF1A TNFRSF1B TNF RELA IFNGR1 TAX1BP3 NFKB1 JAK2 IKBKB TP53 RB1	c2.cp
KEGG_BLADDER_CANCER	0.00144951	0.0102254	0.61208	1.81957	8	39	MMP9 CDKN1A PGF MYC EGFR CDH1 CDKN2A VEGFA ERBB2 MMP2 THBS1 VEGFC TYMP RASSF1 CCND1 CDK4 TP53 ARAF RB1 VEGFB	c2.cp
KEGG_P53_SIGNALING_PATHWAY	0.00152346	0.0106745	0.544287	1.772	9	65	GADD45B CDK2 CDKN1A PERP SFN GADD45G SERPINE1 IGFBP3 TP53I3 TNFRSF10B CHEK2 FAS CDKN2A PMAIP1 CCNG1 GADD45A STEAP3 SESN1 THBS1 SESN2 PPM1D CCND1 DDB2 CDK4 TP53 SIAH1 CCND3 SESN3 CHEK1	c2.cp
BIOCARTA_HIVNEF_PATHWAY	0.00153894	0.0107106	0.545736	1.7449	9	58	NFKBIA TNFRSF1A TNFRSF1B TNF CASP7 FASLG BIRC3 RELA CASP6 FAS ARHGDIB GSN BCL2 CDK11A MAP3K1 LMNA CFLAR LMNB1 NFKB1 PAK2 RB1 CASP8 MAP3K5 CASP2 TRAF2 CHUK RIPK1 BID	c2.cp
REACTOME_RNA_POL_I_RNA_POL_III_AND_MITOCHONDRIAL_TRANSCRIPTION	0.00159443	0.0110153	0.487565	1.69054	10	97	HIST1H2AD HIST2H2AA3 HIST1H3H HIST1H2AE HIST1H2BH HIST1H2BD HIST1H2BF HIST1H4C HIST1H2AC HIST1H3D HIST1H2BJ HIST2H2AA4 HIST1H4E HIST2H2BE HIST1H3E HIST1H4H HIST1H2BG HIST2H4B H3F3A HIST1H4I PTRF KAT2B HIST2H4A H2AFZ HIST2H2AC ZNF143 POLR2H GTF2H2B HIST1H2BK NFIB POLR3GL H2AFX H3F3B POLR2L MBD2 HIST3H2BB HIST1H2BC RRN3 SNAPC1 HIST2H3D	c2.cp
REACTOME_ACTIVATED_TLR4_SIGNALLING	0.00160397	0.0110153	0.502338	1.72299	10	90	S100A12 TLR2 CD14 NOD2 LY96 NFKBIA IRAK3 NFKB2 IRF7 TLR1 FOS BTK TLR6 TLR4 RELA MYD88 MAPKAPK2 ATF1 TLR3 TAB2 TICAM2 ELK1 SIGIRR MAP3K1 PPP2R1B PELI2 IRAK4 RIPK2 PELI1 RPS27A MAP2K3 IKBKB IRF3 JUN NOD1	c2.cp
PID_EPO_PATHWAY	0.00164096	0.0111952	0.611739	1.77062	9	34	SOCS3 BTK PTPN6 INPP5D STAT5A TEC EPO LYN PLCG2 BCL2 RAP1A EPOR GAB1	c2.cp
PID_ALK1_PATHWAY	0.00169405	0.0114819	0.666035	1.81704	9	25	ID1 TGFB1 TGFBR2 ACVRL1 CAV1 TGFB3 SMAD5 TGFBR1 SMAD4 SMAD9 ENG	c2.cp
BIOCARTA_NFKB_PATHWAY	0.00188324	0.0126813	0.682199	1.82519	10	23	TNFAIP3 NFKBIA IL1R1 TNFRSF1A TNFRSF1B TNF TLR4 RELA MYD88 MAP3K1 NFKB1 IKBKB	c2.cp
PID_HIV_NEF_PATHWAY	0.00196496	0.0131462	0.613313	1.7837	11	35	NFKBIA TNFRSF1A TNF CASP7 FASLG BIRC3 RELA CASP6 FAS BCL2 CFLAR NFKB1 CASP8 MAP3K5 CASP2 TRAF2 CHUK RIPK1 BID CD247	c2.cp
REACTOME_GPCR_DOWNSTREAM_SIGNALING	0.00207278	0.0136047	0.342101	1.3908	17	454	PPBP CXCR1 PTGDR CCR2 RGS1 CXCL6 CXCR2 CXCL1 CCL20 PROKR1 CALCA AGTR1 GPR4 FPR1 PTGER2 FPR2 GCGR OR7C1 CXCR4 OR7A5 C3AR1 CXCL3 C5AR1 ADM RGS18 CCR5 CCR9 CXCL2 APLNR PTGFR HCAR2 CCR1 EDN1 GPR65 SCT CXCL5 FFAR2 OR2A7 ADORA3 RAC2 ADRA2B S1PR3 CXCL13 OXTR MC5R CCL27 LHCGR GNG11 GNRH1 GNAT1 GNG12 NPW GNG5 RGR PIK3R5 ADORA2B GLP1R P2RY14 GAL C3 CXCR6 ANXA1 PTH1R F2RL1 GNA13 CCL5 S1PR4 PTGER4 TACR3 FGD2…	c2.cp
REACTOME_TRANSPORT_OF_GLUCOSE_AND_OTHER_SUGARS_BILE_SALTS_AND_ORGANIC_ACIDS_METAL_IONS_AND_AMINE_COMPOUNDS	0.00207285	0.0136047	0.505168	1.70459	13	82	SLC22A2 SLC22A8 SLC47A1 SLC6A3 SLC22A6 SLC6A20 CP SLC11A1 SLC14A1 SLC5A3 SLC2A5 SLC22A3 SLC6A12 SLC16A3 SLC2A4 SLC16A1 SLC44A3 SLC2A10 SLC2A1 HEPH SLC2A9 SLC30A1 SLC2A12 SLC39A1	c2.cp
REACTOME_AMINO_ACID_AND_OLIGOPEPTIDE_SLC_TRANSPORTERS	0.00205015	0.0136047	0.582686	1.79081	12	46	SLC7A2 SLC38A4 SLC6A20 SLC1A5 SLC5A5 SLC38A2 SLC7A7 SLC6A12 SLC7A9 SLC1A3 SLC1A7 SLC7A11 SLC15A3 SLC15A2 SLC43A1 SLC3A2	c2.cp
REACTOME_TRANSMISSION_ACROSS_CHEMICAL_SYNAPSES	0.00208681	0.0136102	-0.349628	-1.49654	4	180	GABRA6 SLC5A7 CHRNB3 CHRNA6 CHRNA9 CHRNB2 SYN3 CHRNA2 RASGRF1 CHRNA3 CAMK4 SLC32A1 NCALD NEFL KCNJ12 STX1A ADCY1 GRIK3 GABRG3 SLC1A6 CACNA1A CACNG2 NSF SLC17A7 ADCY7 CHRND GRIN2B CACNB1 GAD2 PRKCG SYT1 SNAP25 GNG13 CALM3 GRIN1 RAB3A PLCB1 GRIN2A RIMS1 STXBP1 CACNA1B ARHGEF9 DLG3 PRKCB SYN2 ACTN2 CAMK2D VAMP2 CACNG3 GNG3 CHRNA4 KCNJ9 GABRB2 CACNG8 GABBR2 AKAP5 GABBR1 GRIK2 GABRA1 CACNB3 GABRA3 CAL…	c2.cp
PID_GMCSF_PATHWAY	0.0021287	0.0137967	0.606987	1.7653	12	35	CCL2 IRF8 SYK CISH OSM CSF2RB FOS INPP5D STAT5A PIM1 CSF2RA LYN	c2.cp
BIOCARTA_IL2RB_PATHWAY	0.00225298	0.0145114	0.605832	1.7937	13	38	SOCS3 IL2RG SYK MYC IL2RA FASLG FOS PTPN6 STAT5A FAS NMI BCL2 PIK3CG SOCS1 IKZF3 CFLAR	c2.cp
REACTOME_INTERFERON_ALPHA_BETA_SIGNALING	0.00230521	0.0147562	0.549646	1.74569	14	55	SOCS3 IFNA2 IFITM2 IFITM3 IFITM1 IRF8 HLA-G IRF7 GBP2 IRF1 PTPN6 HLA-B PSMB8 IRF5 ISG20 IRF2 SOCS1 IRF4 IFI27 HLA-C HLA-F IRF3 IFI35 IP6K2 IRF9	c2.cp
REACTOME_TRANSCRIPTION	0.00251356	0.0159912	0.401417	1.49848	18	175	HIST1H2AD HIST2H2AA3 HIST1H3H HIST1H2AE HIST1H2BH HIST1H2BD HIST1H2BF HIST1H4C HIST1H2AC HIST1H3D HIST1H2BJ HIST2H2AA4 HIST1H4E HIST2H2BE HIST1H3E HIST1H4H HIST1H2BG HIST2H4B H3F3A U2AF1 HIST1H4I PTRF KAT2B GTF2E2 PAPOLA POLR2J HIST2H4A H2AFZ HIST2H2AC SNRPG ZNF143 POLR2H PCF11 TAF12 TAF4 LSM10 GTF2H2B TCEA1 HIST1H2BK NFIB SRSF1 POLR3GL H2AFX H3F3B POLR2L MBD2 CPSF2 HIST3H2BB GTF2F2 HIST1H2BC CST…	c2.cp
REACTOME_ACETYLCHOLINE_BINDING_AND_DOWNSTREAM_EVENTS	0.00268757	0.016994	-0.712815	-1.8602	11	15	CHRNB3 CHRNA6 CHRNA9 CHRNB2 CHRNA2 CHRNA3 CHRND	c2.cp
REACTOME_METABOLISM_OF_CARBOHYDRATES	0.00279365	0.0175577	0.380639	1.46068	21	226	OGN OMD LYVE1 FMOD DCN PCK1 PRELP HK3 GPC3 MGAM CD44 HK2 B4GALT1 CHST3 DSE PYGL GPC6 KERA SLC2A5 PGAM2 ALDOB SDC2 HYAL2 HS3ST3A1 SLC2A4 CHSY1 GPC4 VCAN HS3ST3B1 CHST14 HYAL1 SLC2A1 B4GALT4 GYS2 LUM PGM2 BGN CSPG4 CHST9 CHST11 SDC4 SLC25A1 HSPG2 B3GAT2	c2.cp
KEGG_CYTOSOLIC_DNA_SENSING_PATHWAY	0.00283242	0.0176941	0.563527	1.73863	17	47	IL18 IFNA2 IL6 NFKBIA CASP1 IRF7 IL1B AIM2 PYCARD CCL4 RELA CCL5	c2.cp
REACTOME_TRANSCRIPTIONAL_ACTIVITY_OF_SMAD2_SMAD3_SMAD4_HETEROTRIMER	0.00309194	0.0191997	0.593005	1.73565	18	36	WWTR1 TGIF1 MYC SERPINE1 JUNB TGIF2 SP1 CDKN2B HDAC1 SMAD4 E2F5 RBL1 RPS27A SMURF2 SKIL SMAD7	c2.cp
REACTOME_TCR_SIGNALING	0.00312354	0.0192804	0.553471	1.72646	19	50	CD3E PTPRC FYB NFKBIA HLA-DRB1 HLA-DRB5 LCK HLA-DQA1 HLA-DPA1 GRAP2 CD4 VASP HLA-DPB1 RELA WAS CD3D TAB2 MALT1 RIPK2 HLA-DQA2 LCP2 IKBKB PAK2 ENAH CD3G NCK1 BCL10 CHUK PIK3CA MAP3K7	c2.cp
REACTOME_MYD88_MAL_CASCADE_INITIATED_ON_PLASMA_MEMBRANE	0.00326846	0.0200556	0.485732	1.63157	21	80	S100A12 TLR2 NOD2 LY96 NFKBIA IRAK3 NFKB2 TLR1 FOS BTK TLR6 TLR4 RELA MYD88 MAPKAPK2 ATF1 TAB2 ELK1 SIGIRR MAP3K1 PPP2R1B PELI2 IRAK4 RIPK2 PELI1 RPS27A MAP2K3 IKBKB JUN NOD1	c2.cp
KEGG_VIRAL_MYOCARDITIS	0.00332577	0.0202872	0.510355	1.67047	21	67	HLA-DRA CD86 ICAM1 HLA-G HLA-DMB ITGB2 HLA-DRB1 HLA-DRB5 HLA-DQA1 RAC2 HLA-DPA1 CD40LG HLA-DQB1 CD28 HLA-DPB1 HLA-DMA CAV1 ITGAL CD40 HLA-E CD55 MYH7 HLA-B LAMA2	c2.cp
REACTOME_SIGNALING_BY_TGF_BETA_RECEPTOR_COMPLEX	0.0033789	0.0204907	0.527772	1.6973	21	60	WWTR1 PARD3 TGIF1 TGFB1 MYC SERPINE1 TGFBR2 JUNB TGIF2 SP1 CDKN2B HDAC1 TGFBR1 PPP1CC SMAD4 E2F5 F11R RBL1 RPS27A XPO1 SMURF2 SKIL SMAD7 RHOA	c2.cp
PID_AVB3_INTEGRIN_PATHWAY	0.00359174	0.0216548	0.502749	1.6714	23	74	COL1A1 COL2A1 COL1A2 COL6A2 KDR COL6A3 FGF2 COL8A2 COL4A6 CSF1 SPP1 COL3A1 CSF1R TGFBR2 COL8A1 PXN VEGFA ROCK1 FN1 ITGAV F11R COL5A1 TLN1 COL4A4 VAV3 ITGB3 VCL CDKN1B COL4A1 RHOA IGF1R COL11A1 CASP8 ILK	c2.cp
PID_ATF2_PATHWAY	0.00368834	0.0221087	0.533674	1.69497	23	55	SOCS3 IL6 DUSP1 HBG2 HES1 FOS CCNA2 ARG1 JUNB SELE TGFB2 CBFB GADD45A BCL2 PLAU MMP2 ATF3 PDGFRA DDIT3 CSRP2 DUSP5 CCND1 JUN CDK4 RB1	c2.cp
PID_ERA_GENOMIC_PATHWAY	0.003832	0.0228379	0.520747	1.68013	24	61	POU4F2 POU4F1 PGR MYC KLRC3 CEBPB C3 STAT5A HDAC1 NR0B1 SMAD4	c2.cp
PID_FGF_PATHWAY	0.00388863	0.0230429	0.542344	1.70315	24	52	MMP9 HGF FGF23 FGF2 SPP1 PLAUR FOS SDC2 CDH1 FGF17 FGFR4 PLAU GAB1 RUNX2 BGLAP PAK4 JUN FGF18 SHC1 RPS6KA1 PIK3CA MET CDH2 STAT5B FGFR3 SOS1 IL17RD FRS2	c2.cp
ST_GAQ_PATHWAY	0.00404449	0.0238303	0.632718	1.75215	23	27	PITX2 NFKBIA NFKB2 CFB ITPKB ITPR2 ITPR3	c2.cp
REACTOME_TRANSCRIPTIONAL_REGULATION_OF_WHITE_ADIPOCYTE_DIFFERENTIATION	0.00420294	0.024624	0.49656	1.64173	27	71	CEBPD KLF5 ANGPTL4 PCK1 KLF4 TNF TGFB1 CEBPB NR2F2 SLC2A4 RELA LPL PPARA PLIN1 FABP4	c2.cp
KEGG_SPLICEOSOME	0.00432478	0.0251955	0.433302	1.55086	30	123	HSPA6 HSPA1A HSPA1B LSM6 U2AF1 HSPA1L RBM17 SNRPG SNRPA PRPF40A SYF2 SMNDC1 HSPA2 CWC15 PRPF38A TRA2A PRPF38B BUD31 SRSF10 HNRNPC LSM2 SNRNP27 SRSF1 THOC2 RBM22 ISY1 DDX23 DDX5 LSM7 THOC1 CCDC12 PRPF31 LSM5 PHF5A MAGOH SNRPE LSM3 SF3B2 NCBP2 SRSF7 DHX15 SRSF3 SF3B1 CTNNBL1 XAB2 PCBP1 PQBP1 PRPF18 EIF4A3 SRSF4 SNRPB2 NAA38 SRSF9 PRPF3 SNRPF USP39 HNRNPM	c2.cp
BIOCARTA_CASPASE_PATHWAY	0.00445129	0.0257877	0.650201	1.73958	25	23	CASP4 CASP1 CASP7 BIRC3 CASP6 ARHGDIB LMNA LMNB1 PRF1 CASP10 CASP8 CASP2	c2.cp
REACTOME_OLFACTORY_SIGNALING_PATHWAY	0.0045283	0.0260881	-0.555258	-1.74836	17	32	OR1F1 OR2T33 OR52A5 OR1E1 OR2M4 OR2L2 OR3A2 OR2W3 OR2K2 OR5B12 OR2T4 OR2A42 OR11A1 OR1L8	c2.cp
PID_NFAT_TFPATHWAY	0.00462963	0.0265245	0.566295	1.70834	28	42	GATA3 FOSL1 TNF IKZF1 IL2RA CD40LG FASLG FOS JUNB GBP3 NFATC2 MAF CREM NFATC1 SLC3A2	c2.cp
PID_S1P_S1P3_PATHWAY	0.0046909	0.0267278	0.616094	1.73328	27	29	CXCR4 FLT1 S1PR3 PDGFRB GNA13 S1PR1 VEGFA GNA14 ITGAV GNA12 GNAI3 JAK2 ITGB3 RHOA	c2.cp
KEGG_CHRONIC_MYELOID_LEUKEMIA	0.00478254	0.0269538	0.490463	1.62781	31	73	CDKN1A RUNX1 NFKBIA TGFB1 MYC TGFBR2 PIK3R5 RELA STAT5A MECOM TGFB2 CDKN2A TGFB3 HDAC1 TGFBR1 PIK3CG SMAD4 CTBP2 NFKB1 CCND1 IKBKB CDK4 TP53 ARAF CDKN1B RB1 SHC1 SOS2 CHUK PIK3CA SHC4 BCL2L1 STAT5B SOS1 BAD RAF1	c2.cp
PID_DELTA_NP63_PATHWAY	0.00477935	0.0269538	0.56264	1.70534	29	43	TP63 CEBPD RUNX1 PERP YAP1 SFN HES1 TOP2A IGFBP3 RRAD FOSL2 TCF7L1 STXBP4 CDKN2A HBP1 RAB38 ADA AXL	c2.cp
PID_HES_HEY_PATHWAY	0.00487882	0.0273477	0.544723	1.68589	30	48	GATA4 TWIST1 NEUROG3 KDR ID1 HES1 CD4 MAML2 HEY2 HDAC1 ASCL1 RUNX2 STAT3 BGLAP TLE1 JAK2 TCF3 NOTCH1 CDKN1B RB1 HIF1A GHR MYOD1 RBPJ	c2.cp
KEGG_HEDGEHOG_SIGNALING_PATHWAY	0.0049337	0.0275067	0.527581	1.66997	31	54	BMP5 WNT6 GAS1 GLI1 BMP6 BMP4 PRKX GLI2 ZIC2 WNT16 IHH SMO WNT3 CSNK1A1L	c2.cp
PID_P73PATHWAY	0.00506933	0.028004	0.48377	1.61358	33	76	SERPINA1 TP63 CDK2 GDF15 CDKN1A IL4R YAP1 SFN MYC CCNA2 SERPINE1 TP53I3 RELA FAS SP1 BCL2L11 HEY2	c2.cp
PID_MYC_ACTIV_PATHWAY	0.0050769	0.028004	0.479316	1.60095	33	77	MMP9 FOSL1 MYC RCC1 PIM1 ACTL6A PMAIP1 SNAI1 SLC2A1 MYCT1 RPL11 SMAD4 BMI1 PTMA CDC25A TK1 HSPD1 GPAM BIRC5 CDK4 MAX TP53 SHMT1 TAF12 CDCA7	c2.cp
KEGG_ECM_RECEPTOR_INTERACTION	0.00531679	0.0287385	0.474699	1.60758	35	84	COL1A1 COL2A1 COL1A2 ITGA10 CD44 COL6A2 COL6A3 COL4A6 ITGA5 SPP1 COL3A1 ITGB4 ITGA1 SDC2 LAMB2 ITGB8 VWF LAMB4 ITGB1 FN1 ITGB5 LAMA2 ITGA6 ITGAV SDC4 THBS1 HSPG2 LAMA3 COL5A1 LAMC1 COL4A4 ITGA8 ITGA11 ITGB3 LAMA1 LAMA4 TNXB ITGA7 COL4A1 ITGB7 GP1BB GP9 COL11A1	c2.cp
KEGG_SMALL_CELL_LUNG_CANCER	0.00531679	0.0287385	0.473172	1.60241	35	84	CDK2 NFKBIA COL4A6 MYC LAMB2 BIRC3 PIK3R5 RELA CDKN2B LAMB4 ITGB1 BCL2 FN1 LAMA2 ITGA6 ITGAV PIK3CG RXRG CKS1B LAMA3 RXRA LAMC1 COL4A4 NFKB1 CCND1 TRAF4 LAMA1 IKBKB LAMA4 CDK4 MAX TP53 CDKN1B RB1 COL4A1 TRAF2 CHUK LAMA5 PIK3CA	c2.cp
PID_CASPASE_PATHWAY	0.00528689	0.0287385	0.531686	1.66485	33	51	KRT18 CASP4 VIM CASP1 TNFRSF1A TNF CASP7 BIRC3 CASP6 ARHGDIB GSN BCL2 MAP3K1 TFAP2A LMNA LMNB1 PRF1 CASP10 CASP8 CASP2 TRAF2 RIPK1 BID	c2.cp
REACTOME_GPVI_MEDIATED_ACTIVATION_CASCADE	0.00532092	0.0287385	0.600136	1.70746	31	31	COL1A1 COL1A2 FCER1G SYK LCK RAC2 PIK3R5 LYN PLCG2 PIK3CG VAV1 VAV3 LCP2 RHOA FYN PIK3CA PIK3R6	c2.cp
BIOCARTA_KERATINOCYTE_PATHWAY	0.00551963	0.0296573	0.546309	1.67901	34	46	HOXA7 NFKBIA TNFRSF1A TNFRSF1B TNF FASLG FOS EGFR RELA FAS SP1 PRKCH BCL2 MAP3K1 NFKB1 ETS1 MAP2K3 IKBKB JUN	c2.cp
PID_IL1_PATHWAY	0.00557926	0.0298231	0.586966	1.69891	33	34	IL1R2 IL1RN IRAK3 IL1R1 CASP1 IL1B RELA MYD88 TAB2 TICAM2 IRAK4 NFKB1 IKBKB JUN	c2.cp
REACTOME_CHONDROITIN_SULFATE_DERMATAN_SULFATE_METABOLISM	0.00566483	0.0301253	0.542415	1.67349	35	47	DCN GPC3 CHST3 DSE GPC6 SDC2 CHSY1 GPC4 VCAN CHST14 HYAL1 BGN CSPG4 CHST9 CHST11 SDC4 HSPG2 B3GAT2	c2.cp
REACTOME_FACTORS_INVOLVED_IN_MEGAKARYOCYTE_DEVELOPMENT_AND_PLATELET_PRODUCTION	0.0061411	0.0324914	0.436206	1.53819	42	110	NFE2 GATA4 IFNA2 GATA3 MAFF CDK2 HIST1H3H WEE1 IRF7 HBG2 HIST1H3D IRF1 DOCK2 HBB DOCK8 DOCK6 GATA2 HMG20B HIST1H3E HDAC1 H3F3A KIF5B AK3 EHD2	c2.cp
PID_TAP63_PATHWAY	0.00619003	0.0325841	0.522747	1.64953	39	53	TP63 GDF15 CDKN1A PERP TFAP2C DHRS3 ITGB4 IGFBP3 TP53I3 FAS CDKN2A JAG1 PMAIP1 SP1 GADD45A HBP1 ADA NQO1 S100A2 PML AEN TRAF4 IKBKB	c2.cp
REACTOME_RIG_I_MDA5_MEDIATED_INDUCTION_OF_IFN_ALPHA_BETA_PATHWAYS	0.00625859	0.0327786	0.497501	1.61045	40	62	S100A12 IFNA2 TNFAIP3 NFKBIA NFKB2 IRF7 IRF1 RELA RNF135 HERC5 NLRC5 MAP3K1 IRF2 RPS27A IKBKB IRF3 IFIH1 CASP10 CASP8 TRAF2 CHUK UBE2L6 RIPK1 MAVS NFKBIB PCBP2 TANK UBE2D3 DDX58 UBA52 ISG15 AGER ATG12	c2.cp
KEGG_NEUROACTIVE_LIGAND_RECEPTOR_INTERACTION	0.00654912	0.0337882	-0.306581	-1.35695	12	249	GABRA6 GRM4 HTR2C NPBWR2 SSTR5 P2RX2 CCKAR HCRTR1 GRM5 CHRNB3 MCHR2 MTNR1A HTR6 NPFFR2 CHRNA6 ADRA1D CHRM4 MAS1 HTR4 AVPR2 CHRNA9 FSHR CHRM2 CHRNB2 CHRNA2 PRLHR CHRNA3 NMBR ADRA1B MC2R PTGER3 GRIN3B GALR1 GRIN3A MCHR1 P2RX3 HTR2B GRIK3 DRD3 SCTR GABRG3 HCRTR2 RXFP1 BDKRB1 CRHR1 TSHR GABRD CHRND LTB4R2 GRIN2B CHRM1 CCKBR NPBWR1 NPY5R GRM2 VIPR1 DRD5 GRIN1 GRIN2A SSTR4 GPR156 ADRA2A CGA GRM8 BDKRB2…	c2.cp
BIOCARTA_CYTOKINE_PATHWAY	0.00650172	0.0337882	0.718107	1.7406	35	15	IL18 IL6 LTA IL9 TNF IL10 IL12A	c2.cp
PID_TCR_PATHWAY	0.00653098	0.0337882	0.485307	1.58455	42	66	CD3E PTPRC HLA-DRA FYB CD86 HLA-DRB1 MAP3K8 LCK GRAP2 CD4 CD28 PTPN6 INPP5D ORAI1 WAS CD3D RAP1A SLA2 VAV1 MALT1 CD80	c2.cp
PID_IL2_STAT5_PATHWAY	0.00670129	0.0344022	0.606884	1.70737	39	29	LTA IL2RG LCK MYC IL2RA FASLG CCNA2 ELF1 STAT5A SP1 BCL2	c2.cp
KEGG_ADHERENS_JUNCTION	0.00678938	0.0346827	0.485622	1.59478	44	68	PARD3 RAC2 TGFBR2 EGFR PTPN6 YES1 CDH1 TCF7L1 SNAI2 ERBB2 WAS LEF1 SNAI1 IQGAP1 TGFBR1 SMAD4 WASF2 TCF7 VCL RHOA IGF1R TCF7L2 SORBS1 FYN CTNNA1 FER MAP3K7 TJP1 PTPRB MET	c2.cp
KEGG_CELL_CYCLE	0.0069667	0.0352413	0.426138	1.52721	49	124	GADD45B CDK2 CDKN1A SFN WEE1 TGFB1 MYC GADD45G CDKN2C CCNA2 CDC14A CHEK2 TGFB2 PTTG2 CDKN2A CDKN2B CDC45 GADD45A TGFB3 HDAC1 ORC1 SMAD4 E2F5 STAG2 STAG1 RBL1 CDC26 MAD2L2 CDC25A PCNA CDKN1C PTTG1 MCM5 CCND1 CDC6 CDK4 TP53 MCM7 CDKN1B RB1 CCND3 CHEK1 ANAPC11 DBF4 CDK1 E2F4 ATM CDC16 SMC3 BUB3 ESPL1 RBL2 MCM3 RAD21 SMAD2 SKP2	c2.cp
WNT_SIGNALING	0.00694137	0.0352413	0.461388	1.5625	46	84	PITX2 WNT6 WISP1 FRZB FOSL1 FZD2 MYC WNT16 TCF7L1 B2M LEF1 FZD1 WNT3 RPL13A CTBP2 DKK1 SLC9A3R1 FZD8 FZD4 LRP5 PYGO1 FZD5 TCF7 TLE1 CCND1 FZD7 WNT5B JUN CCND3	c2.cp
BIOCARTA_CARDIACEGF_PATHWAY	0.00724894	0.036491	0.680019	1.72129	40	18	AGTR1 EDN1 MYC FOS EGFR RELA ADAM12 EDNRB AGT NFKB1 JUN EDNRA RHOA	c2.cp
ST_TUMOR_NECROSIS_FACTOR_PATHWAY	0.00753895	0.0377391	0.60371	1.69844	44	29	TNFAIP3 NFKBIA NFKB2 TNFRSF1A TNFRSF1B TNF BIRC3 CFLAR NFKB1 JUN CASP8 TRAF2 MAP3K7 RIPK1 NFKBIB BIRC2 MAP3K3 NFKBIL1	c2.cp
REACTOME_IL1_SIGNALING	0.00756966	0.0377391	0.558399	1.65999	46	39	IL1R2 IL1RN NOD2 IRAK3 IL1R1 MAP3K8 IL1B TNIP2 MYD88 TAB2 PELI2 IRAK4 RIPK2 PELI1	c2.cp
BIOCARTA_CSK_PATHWAY	0.00768559	0.0381338	0.66058	1.71412	43	20	CD3E PTPRC HLA-DRA HLA-DRB1 LCK CD4 CD3D	c2.cp
BIOCARTA_DEATH_PATHWAY	0.00775194	0.0382798	0.581818	1.675	46	33	NFKBIA TNFRSF10A CASP7 BIRC3 RELA TNFRSF10B CASP6 BCL2 LMNA CFLAR NFKB1 CASP10 CASP8 TRAF2 CHUK RIPK1 BID BIRC2 TNFSF12 GAS2	c2.cp
BIOCARTA_CCR5_PATHWAY	0.00784733	0.038478	0.687904	1.71733	43	17	CCL2 CXCR4 CCR5 FOS CCL4	c2.cp
REACTOME_TRAFFICKING_OF_AMPA_RECEPTORS	0.00786627	0.038478	-0.572472	-1.72672	31	27	CACNG2 NSF PRKCG PRKCB CAMK2D CACNG3 CACNG8 AKAP5 CAMK2B AP2A1 AP2M1 GRIA3 GRIA4 EPB41L1 CAMK2A AP2B1 GRIP2 GRIA1	c2.cp
REACTOME_RAS_ACTIVATION_UOPN_CA2_INFUX_THROUGH_NMDA_RECEPTOR	0.00796359	0.0387711	-0.641317	-1.7287	34	17	RASGRF1 NEFL GRIN2B CALM3 GRIN1 GRIN2A ACTN2 CAMK2D CALM1 CAMK2B RASGRF2 CAMK2A	c2.cp
PID_SYNDECAN_4_PATHWAY	0.00831393	0.0402876	0.589795	1.67804	49	31	MMP9 CXCR4 FGF2 ITGA5 CCL5 ADAM12 ITGB1 FN1 TFPI SDC4 THBS1 LAMA3 MDK SDCBP FZD7 LAMA1	c2.cp
KEGG_PATHOGENIC_ESCHERICHIA_COLI_INFECTION	0.00894234	0.0431312	0.509393	1.6124	57	54	TUBAL3 KRT18 CD14 HCLS1 LY96 TLR5 TUBB6 EZR ARPC1B TLR4 TUBA1C CDH1 WAS ITGB1 ROCK1	c2.cp
KEGG_MATURITY_ONSET_DIABETES_OF_THE_YOUNG	0.00902778	0.043142	0.647045	1.69545	51	21	MNX1 PDX1 FOXA3 NKX6-1 NEUROG3 HES1 HHEX MAFA PAX6 NR5A2	c2.cp
REACTOME_DEGRADATION_OF_THE_EXTRACELLULAR_MATRIX	0.00901974	0.043142	0.628026	1.69874	52	24	MMP9 MMP8 TPSAB1 TIMP1 MMP14 MMP3 PRSS2 MMP25 MMP2 KLKB1	c2.cp
BIOCARTA_IL10_PATHWAY	0.00927412	0.0441159	0.682378	1.70353	51	17	IL6 TNF HMOX1 IL10 STAT5A IL10RA STAT3	c2.cp
PID_HNF3B_PATHWAY	0.0094189	0.0446	0.537166	1.62047	58	42	FOXA1 CEBPD PDX1 FOXA3 PCK1 TTR FOXF1 ALDOB CEBPB SP1	c2.cp
KEGG_NOTCH_SIGNALING_PATHWAY	0.00946223	0.0446015	0.525771	1.61589	59	46	HES1 NOTCH2 DTX3L DLL4 JAG1 MAML2 DLL1 MFNG HDAC1 DTX2 NOTCH4 NOTCH3 LFNG CTBP2 KAT2B	c2.cp
REACTOME_SIGNALING_BY_SCF_KIT	0.00972763	0.045645	0.466096	1.54955	64	74	MMP9 CDKN1A LCK GRAP2 FOXO1 PTPN6 STAT5A TEC YES1 FES LYN SOCS6 FOXO4 VAV1 SOCS1 STAT3 GRAP JAK2 CDKN1B SH2B2 CHEK1 RICTOR FYN CHUK FER PIK3CA CDK1 STAT5B SOS1 BAD PHLPP1 RAF1	c2.cp
REACTOME_AMINE_LIGAND_BINDING_RECEPTORS	0.0100629	0.0470055	-0.530793	-1.67132	39	32	HTR2C HTR6 ADRA1D HTR4 CHRM2 ADRA1B HTR2B DRD3 CHRM1 DRD5 ADRA2A HTR2A CHRM3 DRD2	c2.cp
BIOCARTA_CTLA4_PATHWAY	0.0101659	0.0472735	0.678509	1.69387	56	17	CD3E HLA-DRA CD86 HLA-DRB1 LCK CD28 CD3D CD80	c2.cp
PID_TCPTP_PATHWAY	0.0105364	0.0487779	0.535169	1.61445	65	42	KDR HGF CSF1 ITGA1 CSF1R EGFR PDGFRB STAT5A VEGFA ITGB1 GAB1 STAT3 LMAN1	c2.cp
REACTOME_ACTIVATION_OF_NMDA_RECEPTOR_UPON_GLUTAMATE_BINDING_AND_POSTSYNAPTIC_EVENTS	0.0109948	0.0506736	-0.501465	-1.62938	41	37	RASGRF1 CAMK4 NEFL ADCY1 GRIN2B CALM3 GRIN1 GRIN2A ACTN2 CAMK2D CALM1 CAMK2B GRIA3 RASGRF2 GRIA4 MAPK1 CAMK2A PDPK1 CAMKK1 GRIA1 CALM2 PRKACB BRAF GRIA2	c2.cp
REACTOME_NFKB_AND_MAP_KINASES_ACTIVATION_MEDIATED_BY_TLR4_SIGNALING_REPERTOIRE	0.0111631	0.0512217	0.467354	1.53832	73	69	S100A12 CD14 NOD2 LY96 NFKBIA NFKB2 FOS TLR4 RELA MAPKAPK2 ATF1 TLR3 TAB2 TICAM2 ELK1 PPP2R1B RIPK2 RPS27A MAP2K3 IKBKB JUN NOD1 MAPKAPK3 RPS6KA1 CHUK MAP3K7 CDK1 IRAK2 RIPK1 NFKBIB	c2.cp
KEGG_VEGF_SIGNALING_PATHWAY	0.0118175	0.0539857	0.45911	1.52152	78	72	PLA2G2A HSPB1 KDR RAC2 NOS3 NFATC4 PIK3R5 NFATC2 SH2D2A PXN VEGFA MAPKAPK2 SPHK1 NFATC1 PLCG2 PIK3CG	c2.cp
REACTOME_FORMATION_OF_FIBRIN_CLOT_CLOTTING_CASCADE	0.0121972	0.0552336	0.604271	1.64853	71	25	F13A1 F10 SERPING1 VWF F5 PROS1 THBD SERPINC1 F3 PRCP TFPI F11 KLKB1	c2.cp
REACTOME_IL_3_5_AND_GM_CSF_SIGNALING	0.01216	0.0552336	0.536244	1.60353	75	40	IL2RG SYK HCK IL2RA CSF2RB PTPN6 STAT5A TEC YES1 CSF2RA BLNK IL3RA LYN INPPL1 VAV1	c2.cp
REACTOME_APOPTOSIS	0.0128153	0.0577801	0.398028	1.4505	93	140	DSP DSG2 HIST1H1C VIM HIST1H1D TNFRSF1A TNF CASP7 FASLG TNFRSF10B CDH1 CASP6 FAS BMF PMAIP1 GSN ARHGAP10 BCL2L11 TJP2 PSMB8 ROCK1 BCL2 BMX PSMB9 HMGB2 OCLN LMNA RPS27A CFLAR LMNB1 PSME1	c2.cp
PID_IL2_1PATHWAY	0.0129991	0.0583551	0.500052	1.57792	83	53	SOCS3 CDK2 IL2RG SYK CISH DOK2 LCK MYC IL2RA FOS STAT5A MAPKAPK2 BCL2 SOCS1 STAT3 IKZF3	c2.cp
ST_ADRENERGIC	0.0134559	0.0601454	0.556814	1.61164	81	34	PITX2 CFB ITPKB EGFR ITPR2 ITPR3 GAST	c2.cp
BIOCARTA_CD40_PATHWAY	0.0137258	0.0601627	0.68615	1.66314	75	15	TNFAIP3 NFKBIA DUSP1 CD40LG RELA CD40 MAP3K1 NFKB1 IKBKB	c2.cp
PID_E2F_PATHWAY	0.0137498	0.0601627	0.455467	1.51166	91	73	CES1 CDK2 CDKN1A CASP7 MYC CDKN2C CCNA2 SERPINE1 CDKN2A HIC1 MCL1 SP1 HBP1 HDAC1 PLAU UXT ORC1 E2F5 SIRT1 MYBL2 KAT2B RBL1 CDC25A TK1 POLA1 CDC6 CDKN1B RB1 CCND3	c2.cp
PID_TGFBR_PATHWAY	0.0135239	0.0601627	0.492428	1.56397	87	55	TGFBR3 YAP1 TGFB1 TGFBR2 CAV1 CTGF BAMBI TGFB2 DAB2 TGFB3 TGFBR1 TAB2 SMAD4 OCLN PML SMURF2 SKIL SMAD7 SHC1 RHOA	c2.cp
REACTOME_DOWNSTREAM_TCR_SIGNALING	0.0136896	0.0601627	0.564926	1.62637	82	33	CD3E NFKBIA HLA-DRB1 HLA-DRB5 LCK HLA-DQA1 HLA-DPA1 CD4 HLA-DPB1 RELA CD3D TAB2 MALT1 RIPK2 HLA-DQA2 IKBKB CD3G BCL10 CHUK PIK3CA MAP3K7 CD247	c2.cp
REACTOME_ION_CHANNEL_TRANSPORT	0.0137216	0.0601627	-0.454409	-1.57845	48	51	GABRA6 ATP12A ATP1A3 ATP2B2 HTR3B ATP8A2 GABRG3 ATP10B ATP2B3 ATP2C2 ATP1A1 ATP2A2 ARHGEF9 ATP2A3 ATP9A GLRA2 ATP1B1 GABRB2 GABRA1 GABRA3 GABRG2 ATP1A4 ATP9B	c2.cp
BIOCARTA_TNFR2_PATHWAY	0.0143211	0.061665	0.653317	1.6537	80	18	LTA TNFAIP3 NFKBIA TNFRSF1B DUSP1 RELA MAP3K1 NFKB1 IKBKB TRAF2 CHUK RIPK1 TANK	c2.cp
REACTOME_TRANSMEMBRANE_TRANSPORT_OF_SMALL_MOLECULES	0.014331	0.061665	0.326929	1.31497	121	388	SLC26A7 SLC22A2 SLC22A8 SLC47A1 SLC6A3 SLC7A2 SLC22A6 SLC26A2 SLC38A4 SLC6A20 SLCO4A1 CP GABRR2 SLC11A1 SLC1A5 SLC14A1 SLC5A5 HK3 AQP1 SLC38A2 HK2 HMOX1 CYBRD1 ABCC2 SLC5A3 SLC2A5 AQP4 GNG11 SLC7A7 TCIRG1 SLC22A3 SLC6A12 SLC16A3 ATP11C GNG12 SLC7A9 ABCC4 ATP6V0E1 GNG5 SLC1A3 SLC2A4 ABCA6 SLC9A2 SLC16A1 SLC1A7 SLC7A11 SLC26A3 ATP8B4 SLC15A3 SLC15A2 SLCO1B1 ABCB1 SLC44A3 SLC2A10 FXYD2 SLC2A1 SLC12A…	c2.cp
REACTOME_TRANSPORT_OF_INORGANIC_CATIONS_ANIONS_AND_AMINO_ACIDS_OLIGOPEPTIDES	0.0142668	0.061665	0.443872	1.51417	96	88	SLC26A7 SLC7A2 SLC26A2 SLC38A4 SLC6A20 SLC1A5 SLC5A5 SLC38A2 SLC7A7 SLC6A12 SLC7A9 SLC1A3 SLC9A2 SLC1A7 SLC7A11 SLC26A3 SLC15A3 SLC15A2 SLC12A7 SLC43A1 SLC3A2 SLC26A6 SLC4A2	c2.cp
REACTOME_TRAF6_MEDIATED_INDUCTION_OF_NFKB_AND_MAP_KINASES_UPON_TLR7_8_OR_9_ACTIVATION	0.0142173	0.061665	0.455088	1.51295	94	74	S100A12 TLR8 NOD2 NFKBIA NFKB2 TLR7 FOS RELA MYD88 MAPKAPK2 ATF1 TAB2 ELK1 MAP3K1 PPP2R1B PELI2 IRAK4 RIPK2 PELI1 RPS27A TLR9 MAP2K3 IKBKB JUN NOD1	c2.cp
KEGG_PROSTATE_CANCER	0.0144415	0.0617186	0.443629	1.51024	97	87	INSRR CDK2 CDKN1A NFKBIA PDGFD EGFR PIK3R5 FOXO1 RELA PDGFRB TCF7L1 ERBB2 LEF1 BCL2 PIK3CG CREB3L2 GSTP1 ATF4 PDGFC PDGFRA NFKB1 TCF7 CCND1 IKBKB TP53 ARAF CDKN1B RB1 IGF1R TCF7L2 CREB3L4 SOS2 CHUK PIK3CA	c2.cp
REACTOME_CLASS_B_2_SECRETIN_FAMILY_RECEPTORS	0.0144625	0.0617186	0.453744	1.51343	96	76	CALCA WNT6 GCGR ADM FZD2 SCT GNG11 GNG12 FZD9 GNG5 GLP1R WNT16 PTH1R IHH RAMP1 GHRHR FZD1 CD55 SMO WNT3 GNG8 GIPR RAMP3 FZD8 FZD4 CALCRL FZD5 WNT9B FZD10 GNG10 FZD7 DHH	c2.cp
PID_VEGFR1_2_PATHWAY	0.0147835	0.06283	0.458772	1.51007	97	69	KDR FLT1 NOS3 MYOF CAV1 PTPN6 FES SH2D2A PXN CDH5 VEGFA MAPKAPK2 IQGAP1 ROCK1 ITGAV GAB1 ITGB3 MAP2K3 PAK2 VCL RHOA NCK1 PTPN2 FYN CTNNA1 PIK3CA	c2.cp
REACTOME_CA_DEPENDENT_EVENTS	0.0152409	0.0645095	-0.546943	-1.64972	61	27	CAMK4 ADCY1 ADCY7 PRKCG CALM3 PDE1A CALM1 PRKACA MAPK1 ADCY6 PRKCD PDE1B PRKAR1A ADCY5 CALM2 PRKACB	c2.cp
PID_LYMPH_ANGIOGENESIS_PATHWAY	0.0153165	0.0645661	0.607768	1.64394	89	24	COL1A1 COL1A2 ITGA5 ITGA1 ITGB1 FN1 FLT4 VEGFC	c2.cp
REACTOME_CELL_CYCLE	0.0157062	0.0655852	0.325939	1.30763	132	375	HIST1H2AD HIST2H2AA3 CDK2 CDKN1A HIST1H2AE HIST1H2BH HIST1H2BD HIST1H2BF HIST1H4C WEE1 UBE2C HIST1H2AC GMNN MYC CDKN2C CCNA2 CDC14A HIST1H2BJ HIST2H2AA4 CHEK2 HIST1H4E CENPA AURKB CDKN2A HIST2H2BE DNA2 CDKN2B SYCP3 HIST1H4H CDC45 NEDD1 HIST1H2BG LIN9 PSMB8 SYNE2 HIST2H4B HDAC1 PPP1CC RPS27 ORC1 FBXO5 HIST1H4I E2F5 STAG2 STAG1 MAPRE1 MYBL2 PSMB9 RBL1 POLD1 CKS1B PPP2R1B CDC26 CDC25A PCNA HIST2H4A …	c2.cp
REACTOME_RIP_MEDIATED_NFKB_ACTIVATION_VIA_DAI	0.0156947	0.0655852	0.658202	1.64318	87	17	S100A12 NFKBIA NFKB2 RELA RIPK3 TLR3	c2.cp
REACTOME_ANTIGEN_ACTIVATES_B_CELL_RECEPTOR_LEADING_TO_GENERATION_OF_SECOND_MESSENGERS	0.015748	0.0655852	0.579677	1.63083	93	29	CD79A SYK PIK3AP1 BTK ORAI1 CD79B BLNK ITPR2 LYN PLCG2 ITPR3 VAV1	c2.cp
BIOCARTA_IL7_PATHWAY	0.015873	0.0658413	0.657109	1.64045	88	17	IL2RG LCK STAT5A NMI BCL2 IL7R PIK3CG IL7	c2.cp
REACTOME_TAK1_ACTIVATES_NFKB_BY_PHOSPHORYLATION_AND_ACTIVATION_OF_IKKS_COMPLEX	0.0163737	0.0676474	0.616256	1.63332	94	22	S100A12 NOD2 NFKBIA NFKB2 RELA TAB2 RIPK2 IKBKB NOD1 CHUK MAP3K7 IRAK2 NFKBIB	c2.cp
PID_NOTCH_PATHWAY	0.0168712	0.0694262	0.481085	1.53649	109	57	MFAP2 GATA3 MFAP5 CDKN1A MYC NOTCH2 ADAM12 DLL4 JAG1 MAML2 DLL1 HDAC1 NOTCH4 NOTCH3 MYCBP	c2.cp
BIOCARTA_RELA_PATHWAY	0.0174335	0.0712376	0.667585	1.64314	96	16	NFKBIA TNFRSF1A TNFRSF1B TNF RELA NFKB1 IKBKB CHUK RIPK1	c2.cp
BIOCARTA_STRESS_PATHWAY	0.0174488	0.0712376	0.593495	1.61914	102	25	LTA NFKBIA TNFRSF1A TNF RELA ATF1 MAP3K1 NFKB1 MAP2K3 IKBKB JUN CASP2 TRAF2 CHUK RIPK1 TANK	c2.cp
KEGG_T_CELL_RECEPTOR_SIGNALING_PATHWAY	0.0175919	0.0715405	0.420383	1.46717	121	102	CD3E PTPRC NFKBIA MAP3K8 TNF LCK GRAP2 IL10 CD40LG FOS NFATC4 CD4 CD28 PIK3R5 RELA PTPN6 NFATC2 TEC CD3D NFATC1 PDCD1 PIK3CG VAV1 MALT1 VAV3 NFKB1 PAK4 LCP2 IKBKB JUN PAK2 CDK4 NFATC3 CD3G RHOA NCK1 BCL10 FYN SOS2 CHUK PIK3CA MAP3K7 NFKBIB CD247 PPP3CC	c2.cp
KEGG_PANCREATIC_CANCER	0.0181023	0.0733284	0.455308	1.49866	119	69	PGF RAC2 TGFB1 TGFBR2 EGFR PIK3R5 RELA TGFB2 CDKN2A VEGFA ERBB2 TGFB3 TGFBR1 ARHGEF6 PIK3CG SMAD4 VEGFC STAT3 NFKB1 CCND1 IKBKB CDK4 TP53 ARAF RB1 VEGFB RAD51	c2.cp
REACTOME_NUCLEOTIDE_BINDING_DOMAIN_LEUCINE_RICH_REPEAT_CONTAINING_RECEPTOR_NLR_SIGNALING_PATHWAYS	0.0182505	0.073641	0.508152	1.55784	115	45	CASP4 NOD2 TNFAIP3 CASP1 TXNIP AIM2 PYCARD BIRC3 P2RX7 BCL2 TAB2 CARD9 RIPK2 PSTPIP1 IKBKB NOD1 CASP8 CASP2 CHUK MEFV MAP3K7 IRAK2 BCL2L1 BIRC2	c2.cp
BIOCARTA_NOS1_PATHWAY	0.0189385	0.0761211	-0.582323	-1.63326	80	20	GRIN2B NOS1 CALM3 GRIN1 GRIN2A PRKCB PPP3CB CALM1 DLG4 PRKAR1A CALM2 PRKACB PPP3CA GRIN2C PRKAR1B GRIN2D	c2.cp
BIOCARTA_GSK3_PATHWAY	0.0195484	0.0782689	0.577827	1.60014	115	27	LBP CD14 LY96 GJA1 TLR4 RELA MYD88 LEF1 FZD1	c2.cp
BIOCARTA_IL6_PATHWAY	0.0203378	0.0804974	0.609521	1.61547	117	22	IL6 FOS CEBPB IL6R ELK1 STAT3 IL6ST JAK2 JUN SHC1	c2.cp
REACTOME_COLLAGEN_FORMATION	0.0201973	0.0804974	0.480887	1.52217	130	54	COL1A1 COL2A1 COL1A2 SERPINH1 PCOLCE COL6A2 ADAMTS2 COL6A3 COL8A2 COL4A6 COL3A1 PLOD2 PCOLCE2 COL8A1	c2.cp
REACTOME_POST_NMDA_RECEPTOR_ACTIVATION_EVENTS	0.0203097	0.0804974	-0.494201	-1.56518	79	33	RASGRF1 CAMK4 NEFL ADCY1 GRIN2B CALM3 GRIN1 GRIN2A ACTN2 CAMK2D CALM1 CAMK2B RASGRF2 MAPK1 CAMK2A PDPK1 CAMKK1 CALM2 PRKACB BRAF	c2.cp
KEGG_CALCIUM_SIGNALING_PATHWAY	0.0213366	0.0841293	-0.311514	-1.32717	52	172	HTR2C P2RX2 CCKAR GRM5 HTR6 ADRA1D MYLK2 HTR4 CHRM2 CACNA1S ADRA1B CAMK4 ATP2B2 CALML3 PTGER3 SLC8A2 P2RX3 ADCY1 HTR2B CACNA1A CACNA1G BDKRB1 ATP2B3 ADCY7 LTB4R2 CHRM1 NOS1 CCKBR PRKCG CACNA1H RYR2 SLC8A3 DRD5 CALM3 NOS2 GRIN1 PLCB1 GRIN2A CD38 CACNA1B ATP2A2 BDKRB2 P2RX6 ATP2A3 PRKCB PPP3R1 CACNA1D CAMK2D TACR2 HTR2A CHRM3 PPP3CB ITPR1 PDE1A CACNA1E CALM1 CYSLTR1 ATP2B1 TRPC1 MYLK3 GRM1 CACNA1I …	c2.cp
BIOCARTA_P53_PATHWAY	0.0217469	0.0854227	0.655038	1.61226	120	16	CDK2 CDKN1A TIMP3 GADD45A BCL2 PCNA CCND1 CDK4 TP53 RB1	c2.cp
PID_ARF6_PATHWAY	0.0221058	0.0856063	0.536801	1.56118	134	35	AGTR1 EPHA2 HGF LHCGR EGFR PXN EFNA1 FBXO8 ADRB2 GNA14	c2.cp
PID_FOXO_PATHWAY	0.0219608	0.0856063	0.492706	1.52966	139	49	CDK2 SFN BCL6 SGK1 FASLG FOXO1 CAT BCL2L11 GADD45A SIRT1 FOXO4 FBXO32 KAT2B XPO1 IKBKB G6PC CDKN1B	c2.cp
PID_TCR_CALCIUM_PATHWAY	0.0221239	0.0856063	0.589714	1.59511	129	24	FOSL1 IL2RA CD40LG FASLG FOS JUNB NFATC2 CREM NFATC1	c2.cp
REACTOME_MITOTIC_G1_G1_S_PHASES	0.0221056	0.0856063	0.391876	1.41324	159	130	CDK2 CDKN1A WEE1 MYC CDKN2C CCNA2 CDKN2A CDKN2B CDC45 LIN9 PSMB8 HDAC1 ORC1 FBXO5 E2F5 MYBL2 PSMB9 RBL1 CKS1B PPP2R1B CDC25A PCNA RPA4 POLA1 RPS27A PSME1 MCM5 CCND1 PPP2R3B CDC6 CDK4 MAX MCM7 CDKN1B RB1 CCND3 MCM8 PSMB1 DHFR DBF4 CDK1 E2F4 PRIM2 RBL2 MCM3 PSME2 MCM10 SKP2 PPP2CB UBA52 RRM2 PSMA2	c2.cp
PID_IL3_PATHWAY	0.0223615	0.0860269	0.583332	1.59141	131	25	CISH ID1 OSM CSF2RB CEBPB INPP5D STAT5A PIM1 IL3RA HDAC1	c2.cp
PID_KIT_PATHWAY	0.0223985	0.0860269	0.484461	1.52137	143	52	STAP1 GRAP2 DOK1 PTPN6 STAT5A TEC EPO SNAI2 LYN BCL2 EPOR GAB1 VAV1 SOCS1 STAT3 JAK2 SH2B2 SHC1 FER PIK3CA SPRED1 MAP4K1 MITF SOS1 BAD RAF1	c2.cp
REACTOME_A_TETRASACCHARIDE_LINKER_SEQUENCE_IS_REQUIRED_FOR_GAG_SYNTHESIS	0.0228697	0.0875126	0.582402	1.58887	134	25	DCN GPC3 GPC6 SDC2 GPC4 VCAN BGN CSPG4 SDC4 HSPG2 B3GAT2 GXYLT1	c2.cp
REACTOME_TRAF6_MEDIATED_NFKB_ACTIVATION	0.0232314	0.0885699	0.618967	1.60614	132	20	S100A12 NFKBIA NFKB2 RELA RNF135 MAP3K1 IKBKB IFIH1 TRAF2 CHUK MAVS NFKBIB	c2.cp
SA_G1_AND_S_PHASES	0.0234784	0.0891836	0.659262	1.59797	129	15	CDK2 CDKN1A PRB1 CDKN2A NXT1 CCND1 CDK4 TP53 CDKN1B	c2.cp
REACTOME_APOPTOTIC_EXECUTION_PHASE	0.0238431	0.0902384	0.488401	1.51629	151	49	DSP DSG2 HIST1H1C VIM HIST1H1D CASP7 CDH1 CASP6 GSN TJP2 ROCK1 BMX HMGB2 OCLN LMNA LMNB1	c2.cp
KEGG_ENDOCYTOSIS	0.0245253	0.0924827	0.365606	1.36724	185	176	CXCR1 HSPA6 CXCR2 HSPA1A CXCR4 HSPA1B CCR5 IL2RG HLA-G KDR PARD3 FLT1 IL2RA CSF1R EGFR HLA-E DAB2 FGFR4 F2R HLA-B ADRB2 RAB31 HSPA1L EHD2 RUFY1 CHMP4C ARFGAP3 ACAP1 PARD6B ARAP1 PSD2 HLA-C PDGFRA	c2.cp
REACTOME_CHONDROITIN_SULFATE_BIOSYNTHESIS	0.025035	0.0940627	0.623643	1.60024	142	19	DCN CHST3 CHSY1 VCAN BGN CSPG4 CHST9 CHST11	c2.cp
KEGG_PANTOTHENATE_AND_COA_BIOSYNTHESIS	0.0251618	0.0941976	0.649515	1.59867	139	16	VNN2 VNN1 ENPP1 DPYD BCAT2	c2.cp
REACTOME_UNBLOCKING_OF_NMDA_RECEPTOR_GLUTAMATE_BINDING_AND_ACTIVATION	0.0259798	0.0969104	-0.614955	-1.60482	115	15	NEFL GRIN2B GRIN1 GRIN2A ACTN2 CAMK2D CAMK2B GRIA3 GRIA4 CAMK2A GRIA1 GRIA2 GRIN2C GRIN2D	c2.cp
REACTOME_LATENT_INFECTION_OF_HOMO_SAPIENS_WITH_MYCOBACTERIUM_TUBERCULOSIS	0.0269727	0.100253	0.557738	1.56911	160	29	SLC11A1 NCF2 NCF4 CYBA NOS3 CYBB TCIRG1 ATP6V0E1	c2.cp
REACTOME_L1CAM_INTERACTIONS	0.0274015	0.101483	-0.371066	-1.41287	88	83	SPTB CNTN6 SCN5A ANK1 SCN2B SPTBN2 PAK1 CNTNAP1 SCN1B SCN8A SCN3B ANK3 SPTBN5 SCN2A KCNQ3 L1CAM DNM1 KCNQ2 KIF4B DLG3 DCX CLTC LAMB1 SH3GL2 CNTN2 NRCAM CD24 SPTBN4 MAP2K1 SPTAN1 AP2A1 RPS6KA4 AP2M1	c2.cp
BIOCARTA_G1_PATHWAY	0.0281097	0.103736	0.558461	1.55688	166	28	CDK2 CDKN1A TGFB1 TGFB2 CDKN2A CDKN2B TGFB3 HDAC1 SMAD4 CDC25A CCND1 CDK4 TP53 CDKN1B RB1 DHFR CDK1 ATM	c2.cp
KEGG_O_GLYCAN_BIOSYNTHESIS	0.0287611	0.105763	-0.508692	-1.53434	116	27	GALNT5 WBSCR17 GCNT4 GALNT12 GCNT1 GALNT13 GALNT9 GALNTL6 GALNT11 GALNT14 B4GALT5	c2.cp
PID_CD40_PATHWAY	0.0289373	0.106035	0.549626	1.55681	173	30	TNFAIP3 NFKBIA MYC CD40LG BIRC3 RELA STAT5A CD40 MAP3K1 NFKB1 JUN TDP2	c2.cp
BIOCARTA_FCER1_PATHWAY	0.0296106	0.10715	0.516326	1.5287	183	38	FCER1A FCER1G SYK FOS NFATC4 BTK NFATC2 NFATC1 LYN PIK3CG ELK1 MAP3K1 VAV1 JUN PAK2 NFATC3 SHC1	c2.cp
ST_INTERLEUKIN_4_PATHWAY	0.0296182	0.10715	0.585377	1.56615	172	23	IL2RG IL4R CISH IL13RA1 INPP5D JAK2 SHC1 SOS2 PIK3CA SOS1 IL4 TYK2 RPS6KB1	c2.cp
REACTOME_REGULATION_OF_KIT_SIGNALING	0.0296549	0.10715	0.639747	1.57463	164	16	LCK PTPN6 YES1 LYN SOCS6 SOCS1 SH2B2 FYN	c2.cp
REACTOME_BIOLOGICAL_OXIDATIONS	0.0295483	0.10715	0.391755	1.39385	209	117	CYP4B1 ADH1B FMO1 ADH1C FMO2 CYP1B1 TBXAS1 MAT1A CYP39A1 ACSM1 FMO3 SULT1B1 SMOX SULT1C2 MGST1 GGT5 UGT2A1 PAPSS2 SULT1E1 CYP2C9 CYP3A5 CYP2J2 CYP3A4 ADH6 SULT1C4 MGST2 CYP4F12 SULT1A3 ALDH2 GSTP1 MAOA NAT1 NAT2 CYP1A2 NNMT CYP21A2 CYP4F2	c2.cp
BIOCARTA_BCR_PATHWAY	0.0303577	0.108182	0.528624	1.53005	184	34	CD79A SYK FOS NFATC4 BTK NFATC2 CD79B BLNK NFATC1 LYN ELK1 MAP3K1 VAV1 JUN NFATC3 SHC1	c2.cp
PID_SHP2_PATHWAY	0.0300648	0.108182	0.470043	1.48784	194	54	IL6 IL2RG KDR LCK ANGPT1 NOS3 IL2RA SDC2 EGFR PDGFRB VEGFA IFNGR1 IL6R NGF GAB1 TEK IL6ST GNAI3 JAK2 SHC1 RHOA IGF1R	c2.cp
PID_PDGFRB_PATHWAY	0.0303324	0.108182	0.384587	1.38456	218	128	FGR SFN LCK HCK SLA MYC FOS DOK1 ARPC1B EPS8 PIK3R5 SIPA1 PDGFRB STAT5A YES1 S1PR1 SPHK1 IQGAP1 LYN RAP1A ITGAV PIK3CG GAB1 ELK1 WASF2 RAP1B SLC9A3R1 STAT3 ARAP1 JAK2 ITGB3 JUN MYOCD SHC1 RHOA SLC9A3R2 NCK1 PTPN2 FYN	c2.cp
PID_IL8_CXCR2_PATHWAY	0.030348	0.108182	0.534692	1.53933	183	33	CXCR2 FGR HCK RAC2 VASP DOCK2 LYN PLCB3 GNA14 PIK3CG	c2.cp
REACTOME_NA_CL_DEPENDENT_NEUROTRANSMITTER_TRANSPORTERS	0.0305219	0.108395	0.645206	1.5639	168	15	SLC22A2 SLC6A3 SLC6A20 SLC6A12	c2.cp
REACTOME_TRIF_MEDIATED_TLR3_SIGNALING	0.0310718	0.109971	0.43606	1.44171	206	71	S100A12 NOD2 NFKBIA NFKB2 IRF7 FOS RELA MAPKAPK2 ATF1 RIPK3 TLR3 TAB2 ELK1 PPP2R1B RIPK2 RPS27A MAP2K3 IKBKB IRF3 JUN NOD1 MAPKAPK3 RPS6KA1 CHUK MAP3K7 CDK1 IRAK2 RIPK1 NFKBIB	c2.cp
PID_INTEGRIN_A4B1_PATHWAY	0.0317592	0.112021	0.538397	1.53181	190	31	CD14 VCAM1 ADAM28 SPP1 PXN ITGB1 FN1 THBS1 JAM2 MDK TLN1	c2.cp
REACTOME_CREB_PHOSPHORYLATION_THROUGH_THE_ACTIVATION_OF_CAMKII	0.0322508	0.11337	-0.603939	-1.57607	143	15	NEFL GRIN2B CALM3 GRIN1 GRIN2A ACTN2 CAMK2D CALM1 CAMK2B	c2.cp
BIOCARTA_P53HYPOXIA_PATHWAY	0.0327473	0.113956	0.586655	1.55486	189	22	HSPA1A CDKN1A IGFBP3 HIC1 ABCB1 GADD45A NQO1 TP53 HIF1A ATM NFKBIB	c2.cp
PID_REG_GR_PATHWAY	0.0325728	0.113956	0.434465	1.43643	216	71	GATA3 FKBP5 IL6 CDKN1A ICAM1 SFN SGK1 IRF1 FOS SPI1 RELA STAT5A SELE NFATC1 HDAC1	c2.cp
PID_FOXM1_PATHWAY	0.0326945	0.113956	0.508079	1.5104	202	39	GAS1 CDK2 MYC FOS CCNA2 CHEK2 CENPA AURKB CDKN2A SP1 MMP2 CKS1B CCND1 BIRC5 LAMA4 CDK4 NFATC3 RB1	c2.cp
REACTOME_TIGHT_JUNCTION_INTERACTIONS	0.0336433	0.116683	0.555098	1.52727	198	26	CLDN7 PARD3 CLDN19 CLDN22 CLDN5 CLDN15 CLDN14 CLDN9 CLDN2 F11R PARD6B CLDN10 PARD6G CLDN18	c2.cp
REACTOME_INFLAMMASOMES	0.0337886	0.116796	0.633824	1.56005	187	16	CASP1 TXNIP AIM2 PYCARD P2RX7 BCL2 PSTPIP1	c2.cp
PID_EPHRINB_REV_PATHWAY	0.0347152	0.1196	0.54855	1.51907	205	27	CXCR4 FGR LCK HCK EPHB4 YES1 PTPN13 LYN EFNB1	c2.cp
BIOCARTA_IL2_PATHWAY	0.0352431	0.121017	0.593012	1.55387	202	21	IL2RG SYK LCK IL2RA FOS STAT5A ELK1	c2.cp
PID_AJDISS_2PATHWAY	0.0358829	0.122807	0.474629	1.46895	227	48	DSP IGF2 EGFR PTPN6 GNA13 MMP3 CDH1 IQGAP1 RIN2 JUP	c2.cp
PID_BETA_CATENIN_NUC_PATHWAY	0.036168	0.123376	0.428168	1.42106	241	73	PITX2 MMP9 KLF4 SFN MYC VCAN CDH1 TCF7L1 CDKN2A SNAI2 LEF1 CYR61 HBP1 HDAC1 MDFIC MMP2 DKK1 DKK4 TBL1X TCF7 TLE1 CCND1 XPO1	c2.cp
ST_FAS_SIGNALING_PATHWAY	0.0365854	0.123984	0.444361	1.44198	239	63	TNFRSF6B HSPB1 NFKBIA NFKB2 EZR CD7 BTK EGFR FAS PTPN13 ROCK1 CDK2AP1 MAP3K1 NFKB1 DEDD2 TP53 CASP10 CASP8 MAP3K5 TRAF2 MET RIPK1 NFKBIB PFN1	c2.cp
PID_LYSOPHOSPHOLIPID_PATHWAY	0.0365631	0.123984	0.438744	1.42839	239	65	MMP9 IL6 NFKBIA FOS EGFR RELA GNA13 PXN LYN PLCB3 GNA14 MMP2 GAB1 TRIP6 GNA12 GNAI3 LPAR4 NFKB1 JUN ADCY4 RHOA SLC9A3R2	c2.cp
KEGG_EPITHELIAL_CELL_SIGNALING_IN_HELICOBACTER_PYLORI_INFECTION	0.0369077	0.124669	0.436467	1.42509	242	66	CXCR1 CXCR2 CXCL1 NFKBIA TCIRG1 EGFR ATP6V0E1 RELA CCL5 LYN PLCG2 JAM2 F11R	c2.cp
REACTOME_METABOLISM_OF_STEROID_HORMONES_AND_VITAMINS_A_AND_D	0.0373527	0.125762	-0.479733	-1.48385	148	30	RBP2 CYP24A1 HSD3B1 HSD3B2 STARD5 SRD5A2 CGA CLPS STARD6 SRD5A1 SRD5A3	c2.cp
KEGG_BASAL_CELL_CARCINOMA	0.0377737	0.126768	0.461872	1.46198	244	54	WNT6 GLI1 BMP4 FZD2 GLI2 FZD9 WNT16 TCF7L1 LEF1 FZD1 SMO WNT3 FZD8 FZD4 GLI3 FZD5 WNT9B TCF7 FZD10 FZD7 WNT5B TP53 PTCH1 TCF7L2 WNT5A	c2.cp
BIOCARTA_NKCELLS_PATHWAY	0.0396507	0.132638	0.59153	1.53495	226	20	IL18 SYK KLRC3 PTPN6 KLRC4 B2M ITGB1 VAV1	c2.cp
REACTOME_CELL_JUNCTION_ORGANIZATION	0.0405527	0.135219	0.42876	1.41491	269	70	CLDN7 PARD3 CLDN19 CLDN22 ITGB4 VASP LIMS3 CLDN5 CLDN15 CDH1 CDH5 CLDN14 FERMT2 ITGB1 JUP ARHGEF6 CLDN9 CLDN2 LIMS1 F11R FBLIM1 LAMA3 CD151 PARD6B CLDN10	c2.cp
PID_NFKAPPAB_CANONICAL_PATHWAY	0.0407464	0.13543	0.568763	1.5217	237	23	NOD2 TNFAIP3 NFKBIA TNFRSF1A TNF RELA MALT1 RIPK2 NFKB1 XPO1 IKBKB BCL10 CHUK ATM BIRC2 UBE2D3	c2.cp
BIOCARTA_MCALPAIN_PATHWAY	0.0425347	0.140922	0.581057	1.52254	244	21	EZR ITGA1 EGFR CAPN2 PXN ITGB1 TLN1	c2.cp
BIOCARTA_CELLCYCLE_PATHWAY	0.0431433	0.141581	0.566294	1.51509	251	23	CDK2 CDKN1A CDKN2C CDKN2A CDKN2B RBL1 CDC25A CCND1 CDK4 CDKN1B RB1 CCND3	c2.cp
BIOCARTA_TCR_PATHWAY	0.043038	0.141581	0.477227	1.45413	271	44	CD3E NFKBIA LCK FOS NFATC4 RELA NFATC2 CD3D NFATC1 PIK3CG ELK1 MAP3K1 VAV1 NFKB1 JUN NFATC3 CD3G SHC1 FYN PTPN7 PIK3CA CD247 PPP3CC SOS1 RAF1	c2.cp
PID_HEDGEHOG_2PATHWAY	0.0430556	0.141581	0.580196	1.52029	247	21	GAS1 GLI2 IHH BOC TGFB2 SMO	c2.cp
REACTOME_GROWTH_HORMONE_RECEPTOR_SIGNALING	0.0433188	0.141708	0.58885	1.52799	247	20	SOCS3 CISH PTPN6 STAT5A LYN SOCS1 STAT3 JAK2 GHR IRS2 SOCS2 STAT5B IRS1 PRLR	c2.cp
PID_HDAC_CLASSIII_PATHWAY	0.0435372	0.141975	0.550224	1.50109	256	25	HOXA10 CDKN1A FOXO1 SIRT1 FOXO4 KAT2B SIRT7	c2.cp
KEGG_ADIPOCYTOKINE_SIGNALING_PATHWAY	0.0439909	0.142759	0.429061	1.40438	290	67	SOCS3 LEPR PCK1 NFKBIA TNFRSF1A TNFRSF1B TNF ACSL5 SLC2A4 RELA PPARA SLC2A1 ADIPOR2 RXRG STAT3 RXRA AGRP ACACB NFKB1 JAK2 IKBKB G6PC CPT1A	c2.cp
SIG_BCR_SIGNALING_PATHWAY	0.0440529	0.142759	0.472287	1.44789	279	45	PTPRC SYK BTK NFATC2 INPP5D BLNK ITPR2 NFATC1 LYN PLCG2 ITPR3 BCL2 VAV1 SHC1 CD81 SOS2 CD22 PIK3CA PPP3CC MAP4K1 SOS1 BAD RAF1	c2.cp
SIG_REGULATION_OF_THE_ACTIN_CYTOSKELETON_BY_RHO_GTPASES	0.0449353	0.145165	-0.456785	-1.44668	176	33	RHO ACTG2 MYLK2 ANGPTL2 LIMK1 FSCN2 PAK1 PAK3 PAK6 FSCN1 PFN2 FLNC	c2.cp
PID_AR_PATHWAY	0.0457687	0.147398	0.439346	1.41293	297	60	TGIF1 LATS2 TGFB1I1 PAWR CDKN2A GSN SVIL PRDX1 CTDSP2 FKBP4 VAV3 TMPRSS2 MAK CCND1 CTDSP1 CCND3 KDM3A CMTM2 CASP8 PIAS4 BRCA1 HIP1 NKX3-1 KLK2 TCF4 CDK6 ZNF318 PIAS1 PATZ1 CDK11B	c2.cp
BIOCARTA_FAS_PATHWAY	0.0463995	0.148507	0.525057	1.48722	278	30	CASP7 FASLG CASP6 FAS ARHGDIB PTPN13 MAP3K1 RIPK2 LMNA CFLAR LMNB1 JUN PAK2 RB1 CASP10 CASP8 MAP3K7	c2.cp
ST_MYOCYTE_AD_PATHWAY	0.0463229	0.148507	0.540468	1.48702	273	26	PITX2 CFB CAV3 ITPR2 ITPR3 GAST	c2.cp
BIOCARTA_IL12_PATHWAY	0.0469188	0.149351	0.590098	1.51417	267	19	IL18 CD3E IL18R1 CCR5 IL12A CD3D	c2.cp
REACTOME_PHASE1_FUNCTIONALIZATION_OF_COMPOUNDS	0.0469512	0.149351	0.433427	1.40649	307	63	CYP4B1 ADH1B FMO1 ADH1C FMO2 CYP1B1 TBXAS1 CYP39A1 FMO3 SMOX CYP2C9 CYP3A5 CYP2J2 CYP3A4 ADH6 CYP4F12 ALDH2 MAOA CYP1A2 CYP21A2 CYP4F2 CYP27A1 MAOB ACSS1 CYP11A1 CYP2F1	c2.cp
REACTOME_GABA_SYNTHESIS_RELEASE_REUPTAKE_AND_DEGRADATION	0.047099	0.149363	-0.562918	-1.51737	206	17	SLC32A1 STX1A GAD2 SYT1 SNAP25 RAB3A RIMS1 STXBP1 VAMP2 DNAJC5 GAD1	c2.cp
ST_GRANULE_CELL_SURVIVAL_PATHWAY	0.0478445	0.151264	0.539079	1.4832	282	26	CXCR2 CXCL2 ITPKB FOS	c2.cp
REACTOME_GAP_JUNCTION_ASSEMBLY	0.0485262	0.152954	0.614124	1.51156	269	16	GJB2 GJA4 GJA3 GJA1 GJB6 GJA5	c2.cp
BIOCARTA_GATA3_PATHWAY	0.0491241	0.154369	0.623079	1.51026	271	15	GATA3 JUNB NFATC2 MAF NFATC1	c2.cp
PID_ECADHERIN_STABILIZATION_PATHWAY	0.0507328	0.158553	0.487192	1.44831	314	39	EPHA2 HGF VASP EGFR CDH1 EFNA1 PLEKHA7 ROCK1 AQP3 LPP VCL ENAH RHOA AQP5 NCK1 IGF1R CTNNA1 MET GIT1	c2.cp
REACTOME_G1_PHASE	0.0507614	0.158553	0.50254	1.46154	309	35	CDKN1A CDKN2C CDKN2A CDKN2B E2F5 RBL1 CKS1B PPP2R1B RPS27A CCND1 PPP2R3B CDK4 CDKN1B RB1 CCND3 E2F4 RBL2 SKP2 PPP2CB UBA52	c2.cp
PID_HNF3A_PATHWAY	0.0515381	0.160495	0.486361	1.44584	319	39	FOXA1 SERPINA1 FOXA3 FOS CEBPB NR2F2 SP1	c2.cp
PID_INSULIN_PATHWAY	0.0523734	0.162123	0.469121	1.42943	330	44	TRIP10 SGK1 EIF4EBP1 DOK1 CAV1 INPP5D GRB14 RHOQ	c2.cp
PID_INSULIN_GLUCOSE_PATHWAY	0.0522464	0.162123	0.546775	1.47897	306	24	TRIP10 SFN ASIP SLC2A4 STXBP4 RHOQ PPP1CC	c2.cp
BIOCARTA_41BB_PATHWAY	0.0527361	0.162641	0.61845	1.49904	291	15	NFKBIA RELA MAP3K1 NFKB1 IKBKB JUN MAP3K5 TRAF2 CHUK MAP4K5	c2.cp
REACTOME_GAP_JUNCTION_TRAFFICKING	0.0528545	0.162641	0.540863	1.47555	311	25	GJB2 GJA4 GJA3 GJA1 GJB6 GJA5 DAB2	c2.cp
PID_REELIN_PATHWAY	0.0538061	0.16508	-0.46613	-1.42977	216	29	RELN MAP1B GRIN2B GRIN2A PAFAH1B1 ARHGEF2 MAPT CDK5R1 VLDLR GSK3B PIK3R1 ITGA3 LRP8 MAPK8IP1 MAPK8	c2.cp
KEGG_ACUTE_MYELOID_LEUKEMIA	0.0542945	0.166087	0.439344	1.40317	353	57	RUNX1 MYC EIF4EBP1 PIK3R5 SPI1 RELA STAT5A TCF7L1 PIM1 LEF1 JUP PIK3CG STAT3 PML NFKB1 TCF7 CCND1 IKBKB ARAF TCF7L2 SOS2 CHUK PIK3CA STAT5B SOS1 BAD RAF1	c2.cp
PID_PRL_SIGNALING_EVENTS_PATHWAY	0.0546139	0.166573	0.552323	1.47771	318	23	CDK2 CDKN1A ITGA1 CCNA2 RHOC ITGB1 ROCK1 AGT PTP4A3 RHOA	c2.cp
REACTOME_CREB_PHOSPHORYLATION_THROUGH_THE_ACTIVATION_OF_RAS	0.0558014	0.169695	-0.477672	-1.44078	226	27	RASGRF1 NEFL GRIN2B CALM3 GRIN1 GRIN2A ACTN2 CAMK2D CALM1 CAMK2B RASGRF2 MAPK1 CAMK2A PDPK1	c2.cp
ST_P38_MAPK_PATHWAY	0.0559689	0.169707	0.489816	1.44176	345	37	HSPB1 IL1R1 DUSP1 MKNK2 MAPKAPK2 ATF1 GADD45A TAB2 ELK1 NFKB1 MAP2K3	c2.cp
REACTOME_LIGAND_GATED_ION_CHANNEL_TRANSPORT	0.0561772	0.169842	-0.532332	-1.47322	240	19	GABRA6 HTR3B GABRG3 ARHGEF9 GLRA2 GABRB2 GABRA1 GABRA3 GABRG2	c2.cp
REACTOME_REGULATION_OF_BETA_CELL_DEVELOPMENT	0.0564543	0.170184	0.527584	1.46101	334	27	PDX1 FOXA3 NKX6-1 NEUROG3 HES1 FOXO1 MAFA PAX6 NR5A2	c2.cp
PID_A6B1_A6B4_INTEGRIN_PATHWAY	0.0569311	0.171123	0.458296	1.40851	360	46	SFN CASP7 ITGB4 LAMB2 EGFR CDH1 ERBB2 ITGB1 LAMA2 ITGA6 RXRG LAMA3 RXRA LAMC1 LAMA1 LAMA4 SHC1 LAMA5 PIK3CA MET	c2.cp
REACTOME_TRAFFICKING_OF_GLUR2_CONTAINING_AMPA_RECEPTORS	0.0575588	0.17251	-0.568045	-1.4824	256	15	NSF PRKCG PRKCB AP2A1 AP2M1 GRIA3 GRIA4 AP2B1 GRIP2 GRIA1	c2.cp
KEGG_ARRHYTHMOGENIC_RIGHT_VENTRICULAR_CARDIOMYOPATHY_ARVC	0.0586651	0.175319	0.409879	1.36265	391	74	DSP DSG2 PKP2 ITGA10 GJA1 ITGA5 ITGB4 ITGA1 DSC2 ITGB8 TCF7L1 LEF1 ITGB1 JUP ITGB5 LAMA2 ITGA6 ITGAV CACNG6	c2.cp
BIOCARTA_MITOCHONDRIA_PATHWAY	0.0597222	0.177455	0.561381	1.47098	343	21	CASP7 BIRC3 CASP6 BIK BCL2 CASP8 BID BCL2L1 BIRC2	c2.cp
ST_DIFFERENTIATION_PATHWAY_IN_PC12_CELLS	0.0595973	0.177455	-0.414344	-1.38973	221	43	TH EGR1 MAP1B PIK3C2G EGR4 TUBA1A NTRK1 MAPK9 EGR3 MAPK8IP3 MAP2K4 EGR2 RASGRF2 MAPK8IP2 MAPK10 PIK3R1 MAPK1 MAPK8IP1 MAPK8	c2.cp
BIOCARTA_PML_PATHWAY	0.0602818	0.178555	0.593355	1.48129	337	17	TNFRSF1A TNFRSF1B TNF FASLG SP100 FAS PRAM1 SIRT1 PML TP53 RB1	c2.cp
REACTOME_SIGNALING_BY_HIPPO	0.0604367	0.178555	0.569812	1.47859	345	20	YAP1 WWTR1 LATS2 TJP2 MOB1A STK3 MOB1B AMOT SAV1 TJP1 LATS1	c2.cp
ST_B_CELL_ANTIGEN_RECEPTOR	0.0609913	0.179682	0.482666	1.42904	378	38	NFKBIA NFKB2 SYK ITPKB BTK BLNK LYN PLCG2 VAV1 PRDX1 NFKB1 SHC1 SOS2 ITPKA PIK3CA NFKBIB SOS1 BAD RAF1 NFKBIL1	c2.cp
REACTOME_APOPTOTIC_CLEAVAGE_OF_CELLULAR_PROTEINS	0.0616305	0.181051	0.485056	1.42775	380	37	DSP DSG2 VIM CASP7 CDH1 CASP6 GSN TJP2 ROCK1 BMX OCLN LMNA LMNB1	c2.cp
PID_NFKAPPAB_ATYPICAL_PATHWAY	0.0640271	0.18756	0.590443	1.47402	358	17	NFKBIA SYK LCK BCL3 RELA NFKB1 REL IKBKB	c2.cp
BIOCARTA_ECM_PATHWAY	0.0647149	0.189041	0.543617	1.45442	377	23	ITGA1 PXN GSN ITGB1 ROCK1 ARHGAP5 PIK3CG TLN1 SHC1 RHOA FYN PIK3CA PFN1 RAF1	c2.cp
KEGG_COLORECTAL_CANCER	0.0650282	0.189165	0.423312	1.37029	425	62	RAC2 TGFB1 MYC FOS TGFBR2 PIK3R5 TCF7L1 TGFB2 LEF1 TGFB3 BCL2 TGFBR1 PIK3CG SMAD4 TCF7 CCND1 BIRC5 JUN TP53 ARAF RHOA TCF7L2 MSH6	c2.cp
BIOCARTA_EPO_PATHWAY	0.0653011	0.189165	0.569115	1.46033	372	19	FOS PTPN6 STAT5A EPO EPOR ELK1 JAK2 JUN SHC1 STAT5B SOS1 RAF1	c2.cp
PID_CD8_TCR_PATHWAY	0.0653049	0.189165	0.438938	1.38507	421	53	CD3E PTPRC CD86 MAP3K8 LCK GRAP2 CD28 PTPN6 ORAI1 B2M CD3D RAP1A VAV1 MALT1 CD80 LCP2 IKBKB PRF1 CD3G SHC1 BCL10 FYN CHUK HLA-A CD247	c2.cp
REACTOME_CD28_CO_STIMULATION	0.0655138	0.189242	0.501963	1.42815	393	31	CD86 MAP3K8 LCK GRAP2 CD28 YES1 LYN VAV1 CD80 PAK2 RICTOR FYN PIK3CA	c2.cp
KEGG_FC_EPSILON_RI_SIGNALING_PATHWAY	0.0656989	0.189249	0.404984	1.34638	438	74	PLA2G2A FCER1A FCER1G SYK TNF RAC2 BTK PIK3R5 INPP5D LYN PLCG2	c2.cp
PID_ARF6_TRAFFICKING_PATHWAY	0.0659427	0.189425	0.448159	1.38703	418	48	AGTR1 ITGA10 ITGA5 IL2RA ITGA1 SLC2A4 CDH1 ITGB1 ADRB2 EDNRB ITGA6 ITGAV SCAMP2 ACAP1 VAMP3 ITGA8 ITGA11	c2.cp
KEGG_INSULIN_SIGNALING_PATHWAY	0.0674173	0.192569	0.358257	1.29617	490	132	SOCS3 TRIP10 PCK1 HK3 PRKX HK2 PYGL EIF4EBP1 PPP1R3B PIK3R5 FOXO1 SLC2A4 INPP5D MKNK2 RHOQ RPS6 GYS2 SOCS4 PPP1CC PPP1R3C PPP1R3D PIK3CG PDE3A ELK1 FBP1 SOCS1 PHKA1 ACACB PHKG1 IKBKB G6PC ARAF SH2B2 PYGM SHC1	c2.cp
PID_EPHA_FWDPATHWAY	0.0674434	0.192569	0.491084	1.42139	410	34	EPHA2 FGR LCK HCK PIK3R5 YES1 EFNA1 LYN ROCK1 PIK3CG	c2.cp
REACTOME_TIE2_SIGNALING	0.0675941	0.192569	0.586123	1.46324	378	17	ANGPT2 DOK2 ANGPT1 GRB14 TEK SHC1 PIK3CA	c2.cp
PID_RXR_VDR_PATHWAY	0.06847	0.19453	0.520961	1.43335	404	26	TNF ABCA1 TGFB1 PPARA BCL2 RXRG RXRA NR1H3 RARG NR1H4 PPARG	c2.cp
REACTOME_REGULATION_OF_SIGNALING_BY_CBL	0.0687765	0.194867	0.576788	1.45999	388	18	SYK HCK YES1 BLNK LYN VAV1 FYN PIK3CA	c2.cp
KEGG_MELANOMA	0.0691069	0.195168	0.415354	1.35615	454	66	CDKN1A PDGFD HGF FGF23 FGF2 EGFR PIK3R5 PDGFRB FGF11 CDH1 CDKN2A FGF17 PIK3CG PDGFC PDGFRA CCND1 CDK4 TP53 ARAF RB1 FGF18 IGF1R FGF10 PIK3CA MET	c2.cp
REACTOME_BOTULINUM_NEUROTOXICITY	0.0692591	0.195168	-0.528745	-1.44375	300	18	SYT2 VAMP1 STX1A STX1B SYT1 SNAP25 VAMP2	c2.cp
PID_RB_1PATHWAY	0.0695122	0.19535	0.419138	1.36012	455	63	CEBPD CDK2 CDKN1A CKM CCNA2 ELF1 CEBPB SPI1 TGFB2 CDKN2A HDAC1 SIRT1 RUNX2 BGLAP CCND1 PPP2R3B JUN CDK4 CDKN1B RB1 CCND3 ATF7 MYOD1 AATF MET E2F4 PPARG MITF SKP2 RAF1	c2.cp
PID_IL8_CXCR1_PATHWAY	0.0704987	0.197587	0.519547	1.42946	416	26	CXCR1 FGR HCK LYN PLCB3 GNA14 PIK3CG	c2.cp
NABA_BASEMENT_MEMBRANES	0.07168	0.200356	0.465947	1.39332	447	40	NID1 COL6A2 COL6A3 COL4A6 LAMB2 NPNT LAMB4 LAMA2 HSPG2 PAPLN LAMA3 NID2 LAMC1 COL4A4 HMCN1 LAMA1 LAMA4 COL4A1 LAMA5 COL4A3 USH2A	c2.cp
KEGG_GLYCOSPHINGOLIPID_BIOSYNTHESIS_LACTO_AND_NEOLACTO_SERIES	0.0749872	0.209037	0.535818	1.43356	437	23	B4GALT1 FUT7 B4GALT4 B3GNT5 FUT3 GCNT2 ABO	c2.cp
REACTOME_G0_AND_EARLY_G1	0.0755008	0.209904	0.535271	1.43209	440	23	CDK2 CCNA2 LIN9 HDAC1 E2F5 MYBL2 RBL1 CDC25A PCNA CDC6 CDK1 E2F4 RBL2	c2.cp
REACTOME_S_PHASE	0.0757337	0.209989	0.371085	1.30292	528	106	CDK2 CDKN1A WEE1 MYC CCNA2 DNA2 CDC45 PSMB8 ORC1 PSMB9 POLD1 CKS1B CDC25A PCNA POLA1 RPS27A PSME1 MCM5 CCND1 CDC6 CDK4 MAX MCM7 CDKN1B RB1 RFC4 MCM8 PSMB1	c2.cp
BIOCARTA_P38MAPK_PATHWAY	0.0766629	0.211026	0.46451	1.38088	475	39	HSPB1 TGFB1 MYC HSPB2 TGFB2 MAPKAPK2 TGFB3 TGFBR1 ELK1 MAP3K1 DDIT3 MAX SHC1 MAP3K5 TRAF2 MAP3K7 RIPK1	c2.cp
ST_G_ALPHA_I_PATHWAY	0.077125	0.211026	0.484256	1.40163	469	34	PITX2 CFB ITPKB EGFR ITPR2 PLCB3 ITPR3	c2.cp
PID_P38_MKK3_6PATHWAY	0.076754	0.211026	0.513309	1.4123	453	26	GADD45B GADD45G MAP3K6 GADD45A TAB2 MAP3K1 MAP2K3 MAP3K5 TRAF2 MAP3K7 ATM	c2.cp
PID_ER_NONGENOMIC_PATHWAY	0.0769354	0.211026	0.45965	1.38276	481	41	MMP9 NOS3 GNA13 PLCB3 MSN GNA14 MMP2 GNAI3 SHC1 RHOA IGF1R PIK3CA PLCB2 GNAI2	c2.cp
REACTOME_CROSS_PRESENTATION_OF_SOLUBLE_EXOGENOUS_ANTIGENS_ENDOSOMES	0.0763287	0.211026	0.445402	1.36888	483	46	MRC1 FCGR1A FCGR1B MRC2 PSMB8 PSMB9	c2.cp
BIOCARTA_NDKDYNAMIN_PATHWAY	0.0775426	0.21161	-0.522442	-1.42654	336	18	CALM3 DNM1 SYNJ1 AMPH PPP3CB CALM1 AP2A1 AP2M1 EPS15 CALM2 PPP3CA NME1	c2.cp
BIOCARTA_ERK_PATHWAY	0.0778564	0.211908	0.509791	1.41174	461	27	NGFR MYC EGFR MKNK2 ITGB1 NGF ELK1 STAT3 PDGFRA SHC1 IGF1R RPS6KA1 SOS1 RAF1 GNAS RPS6KA5	c2.cp
REACTOME_NOD1_2_SIGNALING_PATHWAY	0.0799933	0.217155	0.496282	1.40572	480	30	CASP4 NOD2 TNFAIP3 CASP1 BIRC3 TAB2 CARD9 RIPK2 IKBKB NOD1 CASP8 CASP2 CHUK MAP3K7 IRAK2	c2.cp
KEGG_RENAL_CELL_CARCINOMA	0.0818651	0.221656	0.407756	1.33134	538	66	HGF PGF TGFB1 PIK3R5 TGFB2 VEGFA TGFB3 SLC2A1 RAP1A PIK3CG GAB1 EGLN3 RAP1B VEGFC EGLN1 PAK4 ETS1 JUN PAK2 ARAF EPAS1 VEGFB HIF1A SOS2 PIK3CA MET	c2.cp
BIOCARTA_NO2IL12_PATHWAY	0.0821745	0.221914	0.59042	1.4311	454	15	CD3E CCR5 CD2 CD4 IL12A CD3D	c2.cp
KEGG_GALACTOSE_METABOLISM	0.0847027	0.227506	0.514676	1.40411	499	25	HK3 MGAM HK2 B4GALT1 PGM2 G6PC GALK1 GCK	c2.cp
BIOCARTA_INTRINSIC_PATHWAY	0.0845588	0.227506	0.554306	1.42232	482	19	F10 SERPING1 COL4A6 F5 PROS1 SERPINC1 F2R F11 KLKB1 COL4A4	c2.cp
REACTOME_STEROID_HORMONES	0.0849034	0.227506	-0.45901	-1.36905	346	26	CYP24A1 HSD3B1 HSD3B2 STARD5 SRD5A2 CGA STARD6 SRD5A1 SRD5A3	c2.cp
REACTOME_AMINE_COMPOUND_SLC_TRANSPORTERS	0.0857726	0.229243	0.520213	1.40712	503	24	SLC22A2 SLC6A3 SLC6A20 SLC14A1 SLC6A12 SLC44A3	c2.cp
PID_P38_ALPHA_BETA_DOWNSTREAM_PATHWAY	0.0878661	0.234234	0.46368	1.37283	545	38	HSPB1 KRT19 EIF4EBP1 CEBPB MAPKAPK2 ATF1 HBP1 DDIT3 ELK4 JUN TP53	c2.cp
PID_S1P_S1P1_PATHWAY	0.0887153	0.235892	0.539862	1.4146	510	21	KDR PDGFRB S1PR1 VEGFA SPHK1 ITGAV GNAI3 ITGB3 RHOA PLCB2 GNAI2	c2.cp
PID_TELOMERASE_PATHWAY	0.0889701	0.235964	0.404622	1.3173	583	65	TGFB1 MYC IRF1 FOS EGFR NR2F2 SP1 HDAC1 SAP30 NFKB1 CCND1 JUN MAX CDKN1B SP3 HNRNPC BLM PTGES3 MXD1 WT1 ATM	c2.cp
BIOCARTA_CDMAC_PATHWAY	0.089504	0.236774	0.575596	1.41673	497	16	NFKBIA TNF MYC FOS RELA CUZD1 NFKB1 JUN	c2.cp
REACTOME_CYCLIN_E_ASSOCIATED_EVENTS_DURING_G1_S_TRANSITION_	0.0915891	0.241674	0.410211	1.32788	599	62	CDK2 CDKN1A WEE1 MYC CCNA2 PSMB8 PSMB9 CKS1B CDC25A RPS27A PSME1 MAX CDKN1B RB1 PSMB1	c2.cp
PID_ALPHA_SYNUCLEIN_PATHWAY	0.0921986	0.242665	0.478002	1.37612	558	33	SLC6A3 FGR SYK LCK HCK YES1 LYN	c2.cp
REACTOME_IL_2_SIGNALING	0.0939813	0.246108	0.459458	1.36033	583	38	IL2RG SYK LCK IL2RA CSF2RB PTPN6 STAT5A CSF2RA IL3RA INPPL1	c2.cp
REACTOME_SIGNALING_BY_NOTCH	0.0938633	0.246108	0.371013	1.28382	646	95	B4GALT1 HES1 MYC HEYL NOTCH2 DLL4 JAG1 MAML2 DLL1 MFNG HEY2 HDAC1 DTX2 NOTCH4 NOTCH3 LFNG KAT2B TLE3 MOV10 TBL1X RPS27A TLE1 CCND1 JUN TP53 HDAC8 HIF1A RFNG HDAC7 RBPJ POGLUT1	c2.cp
REACTOME_REGULATION_OF_IFNA_SIGNALING	0.094716	0.247407	0.571852	1.40751	526	16	SOCS3 IFNA2 PTPN6 SOCS1	c2.cp
REACTOME_ACTIVATION_OF_GENES_BY_ATF4	0.0957028	0.249356	0.521007	1.39393	558	23	CCL2 HERPUD1 ATF3 ATF4 DDIT3 EXOSC8 EXOSC4 DIS3 IGFBP1	c2.cp
BIOCARTA_MET_PATHWAY	0.0962472	0.250146	0.460885	1.3566	594	37	HGF ITGA1 FOS PXN ITGB1 RAP1A PIK3CG GAB1 ELK1 RAP1B STAT3 JUN DOCK1 PIK3CA MET MAP4K1 SOS1 RAF1	c2.cp
REACTOME_CD28_DEPENDENT_PI3K_AKT_SIGNALING	0.0980903	0.254299	0.533195	1.39713	564	21	CD86 MAP3K8 LCK CD28 CD80 RICTOR FYN PIK3CA	c2.cp
REACTOME_REGULATION_OF_HYPOXIA_INDUCIBLE_FACTOR_HIF_BY_OXYGEN	0.100521	0.25995	0.531209	1.39193	578	21	HIF3A EPO VEGFA EGLN3 RPS27A CA9 EGLN1 EPAS1 HIF1A UBE2D3 UBA52	c2.cp
BIOCARTA_RACCYCD_PATHWAY	0.101775	0.262539	0.497035	1.36752	601	26	CDK2 CDKN1A NFKBIA RELA NFKB1 CCND1 IKBKB CDK4 CDKN1B RB1 RHOA CHUK PIK3CA	c2.cp
BIOCARTA_PITX2_PATHWAY	0.103124	0.264881	0.574221	1.39184	570	15	PITX2 LEF1 FZD1 HDAC1	c2.cp
REACTOME_CELL_CELL_COMMUNICATION	0.103194	0.264881	0.358192	1.26525	726	111	CLDN7 FYB TYROBP PARD3 CLDN19 CLDN22 ITGB4 VASP LIMS3 CLDN5 PTPN6 CLDN15 SIRPG CDH1 CDH5 CLDN14 FERMT2 IQGAP1 ITGB1 JUP ARHGEF6 CLDN9 CLDN2 LIMS1 F11R FBLIM1 CD2AP LAMA3 CD151 PARD6B CLDN10	c2.cp
REACTOME_DOWNREGULATION_OF_SMAD2_3_SMAD4_TRANSCRIPTIONAL_ACTIVITY	0.103466	0.264925	0.540843	1.38778	590	19	TGIF1 TGIF2 HDAC1 SMAD4 RPS27A SMURF2 SKIL UBE2D3 SMAD2 UBA52	c2.cp
BIOCARTA_SPPA_PATHWAY	0.10434	0.26513	0.529404	1.38719	600	21	SYK TBXAS1 ITGA1 F2RL3 F2R ITGB1	c2.cp
BIOCARTA_HIF_PATHWAY	0.104569	0.26513	0.573314	1.38964	578	15	EDN1 NOS3 EPO VEGFA JUN ASPH HIF1A	c2.cp
REACTOME_ANTIGEN_PRESENTATION_FOLDING_ASSEMBLY_AND_PEPTIDE_LOADING_OF_CLASS_I_MHC	0.104514	0.26513	0.529037	1.38623	601	21	HLA-G B2M HLA-B TAP1 HLA-C HLA-F HLA-A HSPA5 SEC13 SEC24B TAP2 HLA-K	c2.cp
NABA_COLLAGENS	0.104114	0.26513	0.435756	1.32776	657	44	COL1A1 COL2A1 COL1A2 COL6A2 COL6A3 COL8A2 COL4A6 COL3A1 COL8A1	c2.cp
BIOCARTA_TGFB_PATHWAY	0.105392	0.266565	0.539711	1.38488	601	19	TGFB1 TGFBR2 CDH1 TGFB2 TGFB3 TGFBR1 SMAD4 SKIL SMAD7 MAP3K7	c2.cp
KEGG_FATTY_ACID_METABOLISM	0.10592	0.267248	0.445499	1.33217	661	40	ADH1B ADH1C ACADL ACSL5 ADH6 ECI2 ACAA2 ALDH2 HADHB ECI1 ALDH7A1 ALDH9A1 ALDH3A2 CPT1A CPT1B ACADVL ACADS ADH4 ACSL1 HADH ADH5 HADHA ACADM	c2.cp
KEGG_METABOLISM_OF_XENOBIOTICS_BY_CYTOCHROME_P450	0.106232	0.267386	0.426606	1.32032	674	48	ADH1B ADH1C CYP1B1 AKR1C2 AKR1C1 AKR1C3 MGST1 UGT2A1 EPHX1 CYP2C9 CYP3A5 CYP3A4 ADH6 GSTM2 MGST2 GSTM3 GSTP1	c2.cp
PID_CD8_TCR_DOWNSTREAM_PATHWAY	0.107241	0.269272	0.409511	1.30464	698	56	IFNA2 CD3E FOSL1 IL2RG TNF IL2RA FASLG FOS JUNB NFATC2 B2M CD3D NFATC1 ELK1 EOMES	c2.cp
REACTOME_ENOS_ACTIVATION_AND_REGULATION	0.108718	0.272321	0.537474	1.37913	620	19	SPR NOS3 CAV1 NOSTRIN GCHFR GCH1 DHFR NOSIP	c2.cp
BIOCARTA_AKT_PATHWAY	0.111632	0.278945	0.523811	1.37254	642	21	NFKBIA FASLG FOXO1 RELA PIK3CG FOXO4 NFKB1 IKBKB GHR CHUK PIK3CA BAD HSP90AA1	c2.cp
SA_CASPASE_CASCADE	0.11222	0.27974	0.534808	1.3723	640	19	CASP7 FASLG BIRC3 FAS PRF1 CASP10 CASP8 BIRC2	c2.cp
PID_TRAIL_PATHWAY	0.117489	0.292172	0.476803	1.32923	697	28	TNFRSF10D TNFRSF10A TNFRSF10C TNFRSF10B MAP3K1 CFLAR IKBKB CASP10 CASP8 TRAF2 CHUK PIK3CA RIPK1	c2.cp
BIOCARTA_PPARA_PATHWAY	0.118563	0.294138	0.407519	1.28993	768	54	HSPA1A NFKBIA TNF DUSP1 MYC RELA STAT5A LPL PPARA SP1 PIK3CG NR2F1 RXRA APOA1 NR1H3	c2.cp
KEGG_DRUG_METABOLISM_CYTOCHROME_P450	0.119788	0.295861	0.414166	1.29192	766	50	AOX1 ADH1B FMO1 ADH1C FMO2 FMO3 MGST1 UGT2A1 CYP2C9 CYP3A5 CYP3A4 ADH6 GSTM2 MGST2 FMO4 GSTM3 GSTP1 MAOA	c2.cp
REACTOME_REGULATION_OF_MRNA_STABILITY_BY_PROTEINS_THAT_BIND_AU_RICH_ELEMENTS	0.119828	0.295861	0.374202	1.25928	807	81	HSPB1 ZFP36 HSPA1B ZFP36L1 MAPKAPK2 PSMB8 XRN1 PSMB9 RPS27A TNFSF13 PSME1 TNPO1 XPO1 PABPC1 PSMB1	c2.cp
BIOCARTA_BCELLSURVIVAL_PATHWAY	0.120237	0.296166	0.553339	1.36195	668	16	CASP7 ITGA1 FOS ITGB1 PIK3CG BIRC5 PIK3CA JUND	c2.cp
BIOCARTA_ATM_PATHWAY	0.121499	0.296457	0.52851	1.35613	693	19	CDKN1A NFKBIA RELA CHEK2 GADD45A NFKB1 JUN TP53 CHEK1 RAD51	c2.cp
PID_S1P_META_PATHWAY	0.12066	0.296457	0.517538	1.3561	694	21	S1PR3 GNA13 S1PR4 S1PR1 SPHK1 GNA14 GNA12 GNAI3	c2.cp
REACTOME_REGULATION_OF_GENE_EXPRESSION_IN_BETA_CELLS	0.121455	0.296457	0.544853	1.36021	680	17	PDX1 FOXA3 NKX6-1 FOXO1 MAFA PAX6	c2.cp
REACTOME_PERK_REGULATED_GENE_EXPRESSION	0.121386	0.296457	0.485877	1.33682	717	26	CCL2 HERPUD1 ATF3 ATF4 DDIT3 EXOSC8 HSPA5 EXOSC4 DIS3 IGFBP1	c2.cp
REACTOME_DAG_AND_IP3_SIGNALING	0.122489	0.298173	-0.425345	-1.30467	493	29	CAMK4 ADCY1 ADCY7 PRKCG CALM3 PRKCE PDE1A CALM1 PRKACA ADCY6 PRKCD PDE1B PRKAR1A ADCY5 CALM2 PRKACB	c2.cp
REACTOME_EFFECTS_OF_PIP2_HYDROLYSIS	0.126172	0.306417	-0.450906	-1.30696	524	23	DGKK RASGRP1 PRKCQ DAGLA TRPC3 PRKCE DGKI DGKQ DGKD DGKB DGKH PRKCD	c2.cp
KEGG_PORPHYRIN_AND_CHLOROPHYLL_METABOLISM	0.126559	0.306639	0.477524	1.32238	750	27	CP HMOX1 UGT2A1 ALAS2	c2.cp
ST_T_CELL_SIGNAL_TRANSDUCTION	0.127215	0.307511	0.424397	1.29315	803	44	PTPRC NFKBIA NFKB2 LCK ITPKB RASGRP4 GRAP2 CD28 CD3D VAV1 PRDX1 NFKB1 PAK4 LCP2 PAK2 DTYMK NCK1 SOS2 ITPKA	c2.cp
REACTOME_G1_S_TRANSITION	0.128275	0.309351	0.351654	1.23469	895	106	CDK2 CDKN1A WEE1 MYC CCNA2 CDC45 PSMB8 ORC1 FBXO5 PSMB9 CKS1B PPP2R1B CDC25A PCNA RPA4 POLA1 RPS27A PSME1 MCM5 PPP2R3B CDC6 MAX MCM7 CDKN1B RB1 MCM8 PSMB1 DHFR DBF4 CDK1 PRIM2 MCM3 PSME2 MCM10 SKP2 PPP2CB UBA52 RRM2 PSMA2	c2.cp
BIOCARTA_MAPK_PATHWAY	0.129094	0.310605	0.365992	1.24368	874	86	NFKBIA MAP3K8 TGFB1 MYC FOS RELA MKNK2 TGFB2 MAPKAPK2 SP1 MAP3K6 TGFB3 TGFBR1 ELK1 MAP3K1 NFKB1 MAP2K3 IKBKB JUN PAK2 MAX ARAF SHC1 MAP3K2 MAPKAPK3 MAP3K5 RPS6KA1 TRAF2 CHUK MAP3K7 MAP4K5 RIPK1 MAPK4 MAP4K1 RAF1 MAP3K3 MAPK7 RPS6KA5 DAXX	c2.cp
REACTOME_THE_ROLE_OF_NEF_IN_HIV1_REPLICATION_AND_DISEASE_PATHOGENESIS	0.131291	0.315159	0.468707	1.30666	779	28	LCK HCK CD4 CD28 DOCK2 B2M	c2.cp
REACTOME_SIGNALING_BY_THE_B_CELL_RECEPTOR_BCR	0.133371	0.319412	0.341571	1.22127	955	121	CDKN1A NFKBIA CD79A SYK PIK3AP1 BTK FOXO1 RELA ORAI1 CD79B BLNK ITPR2 LYN PLCG2 PSMB8 ITPR3 FOXO4 PSMB9 VAV1 MALT1 RPS27A REL PSME1 IKBKB CDKN1B SHC1 PSMB1 NCK1 RICTOR BCL10 FYN CHUK MAP3K7 NFKBIB BLK PSME2 SOS1 BAD PHLPP1 UBA52 PSMA2 AKT1S1	c2.cp
BIOCARTA_VEGF_PATHWAY	0.136371	0.325846	0.4628	1.30201	813	29	KDR FLT1 NOS3 PXN VEGFA PIK3CG FLT4 SHC1 HIF1A EIF2B2 PIK3CA EIF2S2 EIF2B4	c2.cp
BIOCARTA_FMLP_PATHWAY	0.13722	0.327119	0.445499	1.29564	837	35	FPR1 NFKBIA NCF2 NFATC4 RELA NFATC2 NCF1C NFATC1 ELK1 MAP3K1 NFKB1 MAP2K3 NFATC3	c2.cp
REACTOME_RORA_ACTIVATES_CIRCADIAN_EXPRESSION	0.137819	0.327794	0.494774	1.32374	804	23	PPARA RXRA TBL1X NR1D1 CPT1A RORA NCOA3 SMARCD3 ARNTL TGS1 CREBBP NCOA1 EP300	c2.cp
KEGG_PRIMARY_BILE_ACID_BIOSYNTHESIS	0.138523	0.328714	0.551155	1.33593	766	15	CYP39A1 CH25H ACOX2 HSD3B7 CYP27A1 HSD17B4	c2.cp
REACTOME_ION_TRANSPORT_BY_P_TYPE_ATPASES	0.140377	0.332355	-0.401955	-1.26565	557	32	ATP12A ATP1A3 ATP2B2 ATP8A2 ATP10B ATP2B3 ATP2C2 ATP1A1 ATP2A2 ATP2A3 ATP9A ATP1B1 ATP1A4 ATP9B	c2.cp
REACTOME_NOTCH1_INTRACELLULAR_DOMAIN_REGULATES_TRANSCRIPTION	0.140981	0.333023	0.41765	1.27259	890	44	HES1 MYC HEYL MAML2 HEY2 HDAC1 KAT2B TLE3 TBL1X RPS27A TLE1 HDAC8 HIF1A HDAC7 RBPJ	c2.cp
PID_NECTIN_PATHWAY	0.142519	0.335891	0.475911	1.3094	842	26	PDGFRB CDH1 IQGAP1 RAP1A ITGAV F11R RAP1B TLN1 ITGB3 CTNNA1 PIK3CA	c2.cp
REACTOME_CIRCADIAN_REPRESSION_OF_EXPRESSION_BY_REV_ERBA	0.143744	0.338009	0.497083	1.31746	833	22	PPARA RXRA TBL1X NR1D1 RORA NCOA3 SMARCD3 ARNTL TGS1 CREBBP NCOA1 EP300	c2.cp
PID_PDGFRA_PATHWAY	0.146007	0.341781	0.502932	1.31783	840	21	CAV3 FOS CAV1 ITGAV ELK1 PDGFRA JUN SHC1 PIK3CA	c2.cp
REACTOME_NEGATIVE_REGULATORS_OF_RIG_I_MDA5_SIGNALING	0.145851	0.341781	0.455683	1.29072	876	30	TNFAIP3 RNF135 HERC5 NLRC5 RPS27A IRF3 IFIH1 UBE2L6 MAVS PCBP2 UBE2D3 DDX58 UBA52 ISG15 ATG12	c2.cp
KEGG_STEROID_HORMONE_BIOSYNTHESIS	0.147367	0.344188	0.429034	1.27542	914	39	HSD11B2 CYP1B1 AKR1C2 AKR1C1 AKR1C3 HSD17B7 UGT2A1 SULT1E1 CYP3A5 CYP3A4 HSD17B1	c2.cp
REACTOME_THROMBIN_SIGNALLING_THROUGH_PROTEINASE_ACTIVATED_RECEPTORS_PARS	0.148154	0.345249	0.453816	1.29116	890	31	GNG11 GNG12 GNG5 GNA13 F2RL3 F2R GNA14 GNG8 GNA12 GNG10 F2RL2	c2.cp
REACTOME_INTEGRIN_ALPHAIIB_BETA3_SIGNALING	0.148741	0.345839	0.483809	1.30865	873	24	SYK VWF APBB1IP FN1 RAP1A RAP1B TLN1 RAPGEF3 ITGB3 SHC1	c2.cp
REACTOME_ACTIVATED_TAK1_MEDIATES_P38_MAPK_ACTIVATION	0.15231	0.353345	0.525263	1.3113	853	17	NOD2 MAPKAPK2 TAB2 RIPK2 MAP2K3 NOD1 MAPKAPK3 MAP3K7 IRAK2	c2.cp
ST_PHOSPHOINOSITIDE_3_KINASE_PATHWAY	0.154966	0.358705	0.429881	1.26534	957	37	SFN DAPP1 BTK FOXO1 INPP5D CDKN2A CD55	c2.cp
PID_CERAMIDE_PATHWAY	0.156752	0.361885	0.402821	1.24671	995	48	NFKBIA TNFRSF1A TNF MYC BIRC3 RELA PAWR BCL2 MAP3K1 NFKB1 RB1 CASP8 TRAF2 RIPK1 BID BAD RAF1	c2.cp
PID_ECADHERIN_KERATINOCYTE_PATHWAY	0.157038	0.361885	0.510516	1.30996	896	19	VASP EGFR CDH1 JUP RHOA FYN CTNNA1 PIK3CA	c2.cp
KEGG_GLYCOLYSIS_GLUCONEOGENESIS	0.159574	0.366915	0.391798	1.24017	1034	54	ADH1B ADH1C PCK1 HK3 HK2 PGAM2 ALDOB GALM ADH6 PGM2 ALDH2 FBP1 ALDH7A1 ALDH9A1 G6PC ALDH3A2	c2.cp
BIOCARTA_G2_PATHWAY	0.160483	0.368189	0.477602	1.29186	942	24	CDKN1A WEE1 CHEK2 GADD45A CDC25A TP53 CHEK1 RPS6KA1 CDK1 ATM BRCA1 PLK1 CDC34 CDC25C EP300 MYT1 CDC25B	c2.cp
PID_TNF_PATHWAY	0.16095	0.368445	0.40555	1.24329	1022	45	TNFAIP3 TNFRSF1A TNFRSF1B TNF BIRC3 RELA CAV1 TAB2 SMPD2 MAP3K1 NFKB1 MAP2K3 IKBKB CASP8 MAP3K5 TRAF2 CHUK MAP3K7 MAP4K5 RIPK1	c2.cp
KEGG_ARACHIDONIC_ACID_METABOLISM	0.163322	0.373051	0.392437	1.23239	1049	52	PLA2G2A ALOX15B TBXAS1 PTGDS HPGDS AKR1C3 GGT5 CYP2C9 CYP2J2 PTGES ALOX5	c2.cp
BIOCARTA_AMI_PATHWAY	0.165528	0.376432	0.529391	1.303	920	16	F10 COL4A6 PROS1 SERPINC1 F2R TFPI COL4A4 PLAT COL4A1 PLG COL4A3	c2.cp
REACTOME_RECRUITMENT_OF_MITOTIC_CENTROSOME_PROTEINS_AND_COMPLEXES	0.165459	0.376432	-0.328979	-1.18574	570	62	TUBB4A NEK2 TUBGCP5 TUBA1A PAFAH1B1 DCTN1 TUBG2 YWHAG TUBA4A PLK4 TUBG1 DYNC1H1 CEP164 CEP41 TUBB DCTN2 PRKACA PPP2R1A TUBGCP6 CEP192 CEP72 CEP250 ACTR1A HAUS2	c2.cp
REACTOME_CTLA4_INHIBITORY_SIGNALING	0.166493	0.377797	0.492469	1.29041	958	21	CD86 LCK YES1 LYN PPP2R1B CD80	c2.cp
KEGG_STARCH_AND_SUCROSE_METABOLISM	0.167042	0.378216	0.421706	1.24856	1037	38	HK3 MGAM HK2 PYGL UGT2A1 ENPP1 GYS2 PGM2	c2.cp
REACTOME_G_ALPHA_S_SIGNALLING_EVENTS	0.168651	0.381025	0.339809	1.18975	1175	104	PTGDR CALCA PTGER2 GCGR ADM SCT MC5R LHCGR GNG11 GNG12 GNG5 ADORA2B GLP1R PTH1R PTGER4 RAMP1 GHRHR ADORA2A	c2.cp
SA_B_CELL_RECEPTOR_COMPLEXES	0.169163	0.381352	0.472952	1.27928	993	24	SYK FOS BLNK LYN ELK1 MAP3K1 VAV1 VAV3 JUN SHC1 RPS6KA1	c2.cp
BIOCARTA_CHREBP2_PATHWAY	0.171642	0.386101	-0.364541	-1.20306	643	40	PKLR FASN YWHAG PPP2R2C PPP2R2B ACACA YWHAB YWHAZ PPP2R5B PRKACA PPP2R1A YWHAH PRKAA2 PRKAR1A PRKACB PPP2R5D YWHAQ PRKAG1 PRKAR1B PPP2CA PPP2R5C MLXIPL PRKAB1 PPP2R5E	c2.cp
PID_VEGFR1_PATHWAY	0.173964	0.390479	0.459141	1.26326	1028	26	PGF FLT1 NOS3 CAV1 VEGFA CD2AP NRP2 VEGFB NCK1 HIF1A PIK3CA	c2.cp
REACTOME_METABOLISM_OF_PROTEINS	0.174927	0.391792	0.27765	1.12377	1506	423	B3GNT8 B4GALT1 F10 ST6GALNAC2 TUBB6 PLAUR EIF4EBP1 TUBA1C PROS1 MUC16 RPL26P30 RPL10P9 ST6GALNAC3 TRAM1 RPS15P5 SPHK1 RPL34 RPLP1 RPL21 RPL27A RPL36 RPLP2 RPS15A B4GALT4 ST8SIA6 RPS6 RPS26 RPS8 B3GNT5 PIGA RPL39 EIF3FP3 RPS27 RPS17 RPL35 RPL35A RPS28 RPL11 RPL13A RPL30 RPS3A EEF1D RPL23 RPS13 RPS24 RPS3 RPL9 RPL23A RPL13 EIF3E HSCB RPS12 RPL17 RPL27 RPS16 RPL38 RPS21 RPS18 RPL5 MUCL1 RPS25 RPL18 …	c2.cp
KEGG_THYROID_CANCER	0.175909	0.393141	0.444901	1.25166	1049	29	MYC CDH1 TCF7L1 LEF1 PAX8 RXRG RXRA TCF7 CCND1 TP53 TCF7L2	c2.cp
REACTOME_PRE_NOTCH_TRANSCRIPTION_AND_TRANSLATION	0.176853	0.393555	0.474642	1.26988	1032	23	NOTCH2 MAML2 NOTCH4 NOTCH3 KAT2B MOV10 CCND1 JUN TP53 RBPJ	c2.cp
REACTOME_SIGNALING_BY_PDGF	0.176818	0.393555	0.331862	1.17974	1256	116	COL1A1 COL2A1 COL1A2 CDKN1A PDGFD COL6A2 COL6A3 SPP1 COL3A1 FOXO1 PDGFRB STAT5A ITPR2 ITPR3 THBS1 FOXO4 STAT3 COL5A1 COL4A4 PDGFC PDGFRA PLAT ADCY4 CDKN1B COL4A1 NCK1 RICTOR CHUK PLG PIK3CA COL4A3 CDK1	c2.cp
KEGG_LINOLEIC_ACID_METABOLISM	0.182111	0.403319	0.461353	1.25864	1074	25	PLA2G2A AKR1B10 CYP2C9 CYP3A5 CYP2J2 CYP3A4	c2.cp
BIOCARTA_NGF_PATHWAY	0.181931	0.403319	0.504224	1.27631	1028	18	NGFR FOS NGF PIK3CG ELK1 JUN SHC1 PIK3CA SOS1 RAF1	c2.cp
PID_P38_ALPHA_BETA_PATHWAY	0.182408	0.403319	0.437829	1.24568	1096	31	FGR LCK DUSP1 HCK YES1 LYN PRKG1 MAP2K3 PAK2 FYN RIPK1 BLK MAP3K3 DUSP16	c2.cp
KEGG_SELENOAMINO_ACID_METABOLISM	0.183263	0.404348	0.455066	1.25205	1083	26	MAT1A GGT5 PAPSS2 AHCYL2 AHCYL1	c2.cp
BIOCARTA_MTA3_PATHWAY	0.183876	0.404838	0.503108	1.27349	1039	18	HSPB1 TUBA1C HSPB2 CDH1 SNAI2 SNAI1 HDAC1	c2.cp
KEGG_RIG_I_LIKE_RECEPTOR_SIGNALING_PATHWAY	0.186454	0.409645	0.374634	1.20482	1213	60	IFNA2 NFKBIA TNF IRF7 RELA IL12A DDX3Y MAP3K1 TMEM173 NFKB1 IKBKB IRF3 IFIH1 CASP10 CASP8 TRAF2 CHUK MAP3K7 RIPK1 MAVS NFKBIB DDX3X TANK	c2.cp
BIOCARTA_TNFR1_PATHWAY	0.188306	0.412127	0.439674	1.23695	1123	29	TNFRSF1A TNF ARHGDIB MAP3K1 LMNA LMNB1 JUN PAK2 RB1 CASP8 CASP2 TRAF2 MAP3K7 RIPK1	c2.cp
PID_BMP_PATHWAY	0.188378	0.412127	0.403606	1.21756	1179	42	BMP6 BMP4 SMAD6 BMPR1B BAMBI BMPR1A SMAD5 TAB2 SMAD4 BMP7 SMAD9 CTDSP2 NOG CTDSP1 CTDSPL SMURF2 SMAD7	c2.cp
BIOCARTA_GH_PATHWAY	0.189856	0.41252	0.451647	1.24264	1122	26	SLC2A4 PTPN6 STAT5A PIK3CG SOCS1 JAK2 SHC1 GHR RPS6KA1 PIK3CA STAT5B INSR SOS1 RAF1 IRS1	c2.cp
REACTOME_GLUTAMATE_NEUROTRANSMITTER_RELEASE_CYCLE	0.189026	0.41252	-0.478603	-1.24899	843	15	STX1A SLC1A6 SLC17A7 SYT1 SNAP25 RAB3A RIMS1 STXBP1 VAMP2	c2.cp
REACTOME_UNFOLDED_PROTEIN_RESPONSE	0.189565	0.41252	0.356795	1.18785	1267	75	CCL2 KDELR3 DDX12P HERPUD1 SULT1A3 DDX11 ATF3 WFS1 TLN1 CTDSP2 ATF4 LMNA DDIT3 HDGF SERP1 DNAJC3 XBP1 SHC1 TPP1 ACADVL WIPI1 FKBP14 PDIA6 CXXC1 EXOSC8 HSP90B1 HSPA5 EXOSC4 SSR1 ERN1 DIS3 IGFBP1	c2.cp
REACTOME_GLUCAGON_TYPE_LIGAND_RECEPTORS	0.190149	0.41252	0.43898	1.235	1134	29	GCGR SCT GNG11 GNG12 GNG5 GLP1R GHRHR GNG8 GIPR	c2.cp
PID_FAS_PATHWAY	0.191342	0.414242	0.411379	1.21798	1188	38	SYK EZR FASLG BTK BIRC3 FAS MAP3K1 CFLAR IKBKB CASP10 CASP8 CHUK PIK3CA RIPK1 BID BIRC2	c2.cp
KEGG_HYPERTROPHIC_CARDIOMYOPATHY_HCM	0.192479	0.415651	0.350182	1.18162	1299	82	IL6 ITGA10 TNF TGFB1 ITGA5 TNNC1 ITGB4 ITGA1 ITGB8 TGFB2 MYH7 TGFB3 ITGB1 ITGB5 LAMA2 ITGA6 ITGAV CACNG6 MYL3 LMNA SGCD ITGA8 TPM2 ITGA11 ITGB3	c2.cp
BIOCARTA_ARF_PATHWAY	0.192795	0.415651	0.504072	1.2584	1080	17	TWIST1 MYC CDKN2A TBX2 PIK3CG TP53 RB1 PIK3CA	c2.cp
KEGG_GLYCOSAMINOGLYCAN_BIOSYNTHESIS_CHONDROITIN_SULFATE	0.19476	0.417539	0.470466	1.24692	1129	22	CHST3 DSE CHSY1 CHST14 CHST11 B3GAT2	c2.cp
PID_IFNG_PATHWAY	0.194878	0.417539	0.407146	1.21035	1209	39	CASP1 IL1B IRF1 CEBPB IFNGR1 RAP1A RAP1B MAP3K1 SOCS1 STAT3 JAK2 SMAD7 IRF9 PTPN2	c2.cp
REACTOME_NCAM1_INTERACTIONS	0.194556	0.417539	0.407616	1.21175	1207	39	COL1A1 COL2A1 COL1A2 COL6A2 COL6A3 COL3A1	c2.cp
KEGG_FRUCTOSE_AND_MANNOSE_METABOLISM	0.196437	0.419539	0.426144	1.22683	1190	33	AKR1B10 HK3 HK2 ALDOB FBP1 GMDS PFKFB3 PHPT1	c2.cp
PID_HIF1A_PATHWAY	0.196621	0.419539	0.512104	1.26045	1093	16	HIF3A CDKN2A EGLN3 EGLN1 TP53 HIF1A	c2.cp
BIOCARTA_CCR3_PATHWAY	0.200842	0.427665	-0.437233	-1.22632	858	20	CCR3 LIMK1 PIK3C2G PLCB1 PPP1R12B PRKCB	c2.cp
PID_FAK_PATHWAY	0.202678	0.43069	0.372531	1.19111	1316	58	MMP14 ITGA5 CAPN2 YES1 PXN RRAS ITGB1 ITGB5 RAP1A ITGAV BMX RAP1B TLN1 CCND1 ETS1 PTPN21 JUN VCL RHOA NCK1 DOCK1 FYN	c2.cp
KEGG_WNT_SIGNALING_PATHWAY	0.204592	0.432217	0.31352	1.14874	1505	147	SFRP2 WNT6 FOSL1 FZD2 PRKX RAC2 MYC NFATC4 FZD9 WNT16 NFATC2 TCF7L1 LEF1 FZD1 WNT3 NFATC1 PLCB3 ROCK1 CSNK1A1L FRAT2 SMAD4 CTBP2 DKK1 PPP2R1B FZD8 DKK4 FZD4 TBL1X LRP5 VANGL2 FZD5 WNT9B TCF7 FZD10 CCND1 FZD7 MMP7 WNT5B JUN TP53 NFATC3 SIAH1 CCND3	c2.cp
PID_RAC1_PATHWAY	0.203978	0.432217	0.376564	1.19195	1322	54	NCF2 CYBA CYBB ARPC1B STAT5A CDH1 NOX1 NCF1 IQGAP1 ARHGAP5 WASF2 MAP3K1 STAT3 MAP2K3 JUN PAK2	c2.cp
REACTOME_MRNA_SPLICING	0.204646	0.432217	0.330883	1.1585	1426	104	PTBP1 YBX1 HNRNPF U2AF1 PAPOLA HNRNPH1 POLR2J SNRPG SNRPA POLR2H PCF11 HNRNPA2B1 CCAR1 HNRNPC LSM2 SRSF1 POLR2L CPSF2 DDX23 GTF2F2 CSTF3 PCBP2 PHF5A MAGOH SNRPE SF3B2 NCBP2 SRSF7 SRSF3 SF3B1 PCBP1 PABPN1 HNRNPD SRSF4 SNRPB2 SRSF9 SNRPF HNRNPM SRSF11 HNRNPR UPF3B SNRPD3 SNRPD2 HNRNPU U2AF2 CSTF1 HNRNPUL1 SMC1A SRSF5 POLR2I	c2.cp
REACTOME_IL_RECEPTOR_SHC_SIGNALING	0.205752	0.433233	0.455183	1.23122	1208	24	IL2RG IL2RA CSF2RB PTPN6 CSF2RA IL3RA INPPL1	c2.cp
REACTOME_TRAF6_MEDIATED_IRF7_ACTIVATION	0.205963	0.433233	0.465724	1.23435	1194	22	IFNA2 IRF7 IRF1 RNF135 IRF2 IRF3 IFIH1 TRAF2 MAVS TANK DDX58	c2.cp
REACTOME_SIGNALING_BY_NOTCH1	0.207105	0.434753	0.36104	1.18174	1369	67	HES1 MYC HEYL DLL4 JAG1 MAML2 DLL1 HEY2 HDAC1 DTX2 KAT2B TLE3 TBL1X RPS27A TLE1 HDAC8 HIF1A HDAC7 RBPJ	c2.cp
BIOCARTA_RAS_PATHWAY	0.208526	0.436851	0.459852	1.23031	1217	23	RELA PIK3CG ELK1 FOXO4 NFKB1 RHOA CHUK PIK3CA BCL2L1 BAD RAF1 RALGDS	c2.cp
BIOCARTA_CHEMICAL_PATHWAY	0.2101	0.439261	0.463821	1.22931	1218	22	CASP7 CASP6 PXN BCL2 TLN1 TP53 ATM BID BCL2L1 BAD	c2.cp
BIOCARTA_UCALPAIN_PATHWAY	0.21384	0.445285	0.494876	1.23544	1198	17	EZR ITGA1 PXN ITGB1 TLN1 ITGB3 RHOA	c2.cp
REACTOME_HEPARAN_SULFATE_HEPARIN_HS_GAG_METABOLISM	0.213494	0.445285	0.379262	1.18304	1366	50	DCN GPC3 GPC6 SDC2 HS3ST3A1 GPC4 VCAN HS3ST3B1 BGN CSPG4 SDC4 HSPG2 B3GAT2	c2.cp
BIOCARTA_SHH_PATHWAY	0.216001	0.448885	0.512137	1.24135	1195	15	GLI1 GLI2 SMO GLI3 PTCH1	c2.cp
KEGG_RNA_DEGRADATION	0.218932	0.454065	0.369171	1.17613	1426	56	LSM6 XRN1 PNPT1 PAPOLA CNOT8 HSPD1 CNOT6L CNOT6 LSM2 PAPOLG LSM1 XRN2 MPHOSPH6 LSM7 CNOT2 CNOT4 ZCCHC7 LSM5 EXOSC8 LSM3 PATL1 EXOSC4 ENO3 ENO1 DIS3 NAA38 DCP1B	c2.cp
PID_ERBB1_DOWNSTREAM_PATHWAY	0.221216	0.457886	0.326758	1.14482	1538	105	ZFP36 SFN DUSP1 FOS ARPC1B EPS8 EGFR CAPN2 SH2D2A DIAPH3 ATF1 IQGAP1 MYLPF RPS6 GAB1 ELK1 WASF2 MAP3K1 STAT3	c2.cp
BIOCARTA_GLEEVEC_PATHWAY	0.222565	0.45976	0.452967	1.21189	1299	23	MYC FOS STAT5A PIK3CG MAP3K1 JAK2 JUN PIK3CA STAT5B SOS1 BAD RAF1	c2.cp
REACTOME_HS_GAG_DEGRADATION	0.223057	0.459861	0.469203	1.21752	1276	20	GPC3 GPC6 SDC2 GPC4 SDC4 HSPG2	c2.cp
BIOCARTA_INSULIN_PATHWAY	0.226042	0.462954	0.462198	1.2111	1301	21	FOS SLC2A4 PIK3CG ELK1 JUN SHC1 PIK3CA INSR SOS1 RAF1 IRS1	c2.cp
PID_P53_REGULATION_PATHWAY	0.226074	0.462954	0.366637	1.17096	1473	57	CDK2 CCNA2 CHEK2 PPP1R13L CDKN2A CCNG1 RPL11 RPL23 KAT2B RPL5 RASSF1 PPM1D TP53 CHEK1 KAT8 ATM SETD7 TRIM28 SKP2 DAXX	c2.cp
REACTOME_SIGNAL_AMPLIFICATION	0.226343	0.462954	0.422119	1.19565	1360	30	GNG11 GNG12 GNG5 GNA13 GNA14 GNG8 GNAI3 GNG10 P2RY1 GNGT2 TBXA2R	c2.cp
REACTOME_PLATELET_SENSITIZATION_BY_LDL	0.225198	0.462954	0.496955	1.22317	1252	16	FGR PECAM1 PTPN6 PPP2R1B APOB	c2.cp
BIOCARTA_CK1_PATHWAY	0.226904	0.463188	-0.451816	-1.20089	1006	16	PLCB1 DRD2 CDK5R1 GRM1 DRD1 PRKAR1A PRKACB PPP3CA CDK5 PRKAR1B CSNK1D PPP2CA	c2.cp
BIOCARTA_HER2_PATHWAY	0.22837	0.465264	0.455336	1.20682	1324	22	IL6 EGFR IL6R PIK3CG STAT3 IL6ST SHC1 PIK3CA SOS1 RAF1	c2.cp
BIOCARTA_INTEGRIN_PATHWAY	0.229699	0.467055	0.399824	1.17687	1419	37	ITGA1 CAV1 PXN ITGB1 ROCK1 RAP1A TNS1 TLN1 JUN VCL SHC1 RHOA FYN	c2.cp
BIOCARTA_HCMV_PATHWAY	0.23114	0.469064	0.487183	1.21623	1295	17	RELA SP1 PIK3CG MAP3K1 NFKB1 MAP2K3 RB1 PIK3CA	c2.cp
BIOCARTA_TEL_PATHWAY	0.231966	0.469822	0.480088	1.21522	1311	18	MYC EGFR BCL2 TEP1 TP53 RB1 IGF1R	c2.cp
REACTOME_ACYL_CHAIN_REMODELLING_OF_PE	0.234069	0.473156	0.470398	1.20702	1336	19	PLA2G2A PLBD1 MBOAT1	c2.cp
KEGG_TYPE_II_DIABETES_MELLITUS	0.240032	0.483697	0.381853	1.16352	1516	44	SOCS3 PDX1 HK3 HK2 TNF PIK3R5 SLC2A4 MAFA SOCS4 PIK3CG	c2.cp
REACTOME_IRON_UPTAKE_AND_TRANSPORT	0.240216	0.483697	0.403101	1.17234	1466	35	CP HMOX1 CYBRD1 TCIRG1 ATP6V0E1 STEAP3 HEPH	c2.cp
PID_RHOA_PATHWAY	0.24288	0.488113	0.380832	1.16041	1534	44	EZR FOS CYR61 ITGB1 MSN ROCK1 LIMK2 PKN2 TLN1 MAP2K3 F2RL2 PKN1 JUN VCL CDKN1B RHOA	c2.cp
REACTOME_SYNTHESIS_OF_PIPS_AT_THE_GOLGI_MEMBRANE	0.245051	0.48963	-0.438356	-1.18161	1076	17	PI4KA PIK3C2G ARF3 FIG4 TPTE2 VAC14 PI4K2A OCRL PIK3R4 INPP5E PIK3C3	c2.cp
REACTOME_CELL_CELL_JUNCTION_ORGANIZATION	0.244706	0.48963	0.372054	1.15508	1559	49	CLDN7 PARD3 CLDN19 CLDN22 CLDN5 CLDN15 CDH1 CDH5 CLDN14 JUP CLDN9 CLDN2 F11R PARD6B CLDN10 PARD6G CLDN18	c2.cp
REACTOME_DEADENYLATION_DEPENDENT_MRNA_DECAY	0.244253	0.48963	0.385686	1.1635	1529	42	LSM6 XRN1 CNOT8 CNOT6 PABPC1 LSM2 LSM1 CNOT2 CNOT4 LSM5 EXOSC8 PAIP1 LSM3 PATL1 EXOSC4 DIS3 EIF4A3 DCP1B EIF4A1 TNKS1BP1 DCPS DCP1A CNOT3 EIF4B DCP2 EXOSC7 EXOSC6 EDC3	c2.cp
REACTOME_FORMATION_OF_TUBULIN_FOLDING_INTERMEDIATES_BY_CCT_TRIC	0.24737	0.493312	-0.418513	-1.17382	1057	20	TUBB3 TUBB2A TUBA1B TUBB4A TUBA1A TUBA4A	c2.cp
REACTOME_INTRINSIC_PATHWAY	0.248382	0.494381	0.487956	1.20102	1381	16	F10 SERPING1 VWF PRCP F11 KLKB1 GP1BB GP9 A2M	c2.cp
REACTOME_DESTABILIZATION_OF_MRNA_BY_TRISTETRAPROLIN_TTP	0.248974	0.49461	0.479737	1.19765	1395	17	ZFP36 MAPKAPK2 XRN1 TNPO1 EXOSC8 EXOSC4 DIS3	c2.cp
BIOCARTA_RHO_PATHWAY	0.249751	0.495203	0.411778	1.17156	1501	31	ARHGEF5 ARPC1B GSN ARHGAP6 ROCK1 ARHGAP5 TLN1 ARHGAP4 VCL OPHN1 RHOA	c2.cp
REACTOME_TGF_BETA_RECEPTOR_SIGNALING_ACTIVATES_SMADS	0.250681	0.496099	0.436107	1.17962	1472	24	TGFB1 TGFBR2 TGFBR1 PPP1CC SMAD4 RPS27A XPO1 SMURF2 SMAD7 SMAD2 UBA52 PPP1R15A FURIN PPP1CB FKBP1A PMEPA1 STUB1	c2.cp
KEGG_PPAR_SIGNALING_PATHWAY	0.252591	0.496121	0.352018	1.14232	1656	63	ANGPTL4 PCK1 ACADL ACSL5 PLTP LPL ACOX2 DBI PPARA PLIN1 FABP4 FABP7 RXRG RXRA APOA1 NR1H3 FABP5 CYP27A1 CPT1A SLC27A6 SORBS1 CPT1B ILK SLC27A2	c2.cp
KEGG_ENDOMETRIAL_CANCER	0.252605	0.496121	0.365274	1.14708	1623	52	MYC EGFR PIK3R5 CDH1 TCF7L1 ERBB2 LEF1 PIK3CG ELK1 TCF7 CCND1 TP53 ARAF TCF7L2 ILK SOS2 CTNNA1 PIK3CA SOS1 BAD RAF1	c2.cp
REACTOME_ACYL_CHAIN_REMODELLING_OF_PC	0.252227	0.496121	0.455895	1.18299	1443	20	PLA2G2A PLBD1 LPCAT2	c2.cp
REACTOME_PLATELET_CALCIUM_HOMEOSTASIS	0.252366	0.496121	-0.441783	-1.17422	1119	16	ATP2B2 SLC8A2 ATP2B3 SLC8A3 ATP2A2 ATP2A3 TRPC3	c2.cp
REACTOME_PRE_NOTCH_PROCESSING_IN_GOLGI	0.253774	0.497474	0.485391	1.19471	1411	16	B4GALT1 NOTCH2 MFNG NOTCH4 NOTCH3 LFNG	c2.cp
BIOCARTA_CALCINEURIN_PATHWAY	0.255481	0.499072	0.470229	1.19026	1444	18	CDKN1A NFATC4 NFATC2 SP1 NFATC1 NFATC3 SP3	c2.cp
REACTOME_PRE_NOTCH_EXPRESSION_AND_PROCESSING	0.255552	0.499072	0.389526	1.15328	1587	38	B4GALT1 NOTCH2 MAML2 MFNG NOTCH4 NOTCH3 LFNG KAT2B MOV10 CCND1 JUN TP53 RFNG RBPJ POGLUT1	c2.cp
KEGG_TRYPTOPHAN_METABOLISM	0.259736	0.50629	0.387771	1.14808	1613	38	AOX1 CYP1B1 INMT IL4I1 CAT ALDH2 MAOA CYP1A2 AANAT HAAO ALDH7A1 ALDH9A1 ALDH3A2 MAOB	c2.cp
PID_IL2_PI3K_PATHWAY	0.260432	0.506694	0.401612	1.1562	1578	33	IL2RG LCK MYC IL2RA RELA BCL2 RPS6 SGMS1 NFKB1	c2.cp
PID_MYC_PATHWAY	0.261054	0.506953	0.427865	1.16728	1540	25	MYC ACTL6A CDKN2A HBP1 PML PAK2 MAX TAF12 SKP2 PPP2R5A SUPT3H AXIN1	c2.cp
REACTOME_THROMBOXANE_SIGNALLING_THROUGH_TP_RECEPTOR	0.26284	0.509468	0.441665	1.17058	1524	22	GNG11 GNG12 GNG5 GNA13 GNA14 GNG8 GNG10 GNGT2 TBXA2R	c2.cp
REACTOME_DESTABILIZATION_OF_MRNA_BY_BRF1	0.263599	0.509986	0.473577	1.18227	1477	17	ZFP36L1 MAPKAPK2 XRN1 EXOSC8 EXOSC4 DIS3	c2.cp
KEGG_ALPHA_LINOLENIC_ACID_METABOLISM	0.264738	0.511234	0.480245	1.18204	1472	16	PLA2G2A PLA2G4E	c2.cp
REACTOME_DIABETES_PATHWAYS	0.265409	0.511578	0.312128	1.11403	1898	119	CCL2 IGF2 KLF4 IGFBP5 IGFBP3 RAB27A IGFBP6 KDELR3 IGFBP4 DDX12P HERPUD1 MMP2 KIF5B SULT1A3 DDX11 ATF3 WFS1 TLN1 SEC11A CTDSP2 ATF4 LMNA DDIT3 HDGF SERP1 DNAJC3 XBP1 SHC1 CPE TPP1 ACADVL SLC30A7 PLG SPCS2 WIPI1 FKBP14 IGF2BP2 BCHE PDIA6 CXXC1 EXOSC8 HSP90B1 GHRL HSPA5 EXOSC4 SSR1 ERN1	c2.cp
KEGG_GLYCOSYLPHOSPHATIDYLINOSITOL_GPI_ANCHOR_BIOSYNTHESIS	0.269822	0.518158	-0.386194	-1.14113	1105	25	PIGY GPLD1 PIGZ	c2.cp
KEGG_RETINOL_METABOLISM	0.269352	0.518158	0.370409	1.13556	1711	45	ADH1B ADH1C DHRS3 DHRS9 UGT2A1 RDH5 RDH10 CYP2C9 CYP3A5 CYP3A4 ADH6 LRAT DHRS4L2 ALDH1A2 CYP1A2 DHRS4	c2.cp
REACTOME_SYNTHESIS_OF_DNA	0.271216	0.519873	0.324863	1.11426	1859	90	CDK2 CDKN1A CCNA2 DNA2 CDC45 PSMB8 ORC1 PSMB9 POLD1 PCNA POLA1 RPS27A PSME1 MCM5 CDC6 MCM7 CDKN1B RB1 RFC4 MCM8 PSMB1	c2.cp
REACTOME_SIGNALING_BY_RHO_GTPASES	0.275798	0.527681	0.31375	1.10827	1942	111	ARHGAP11B RHOD RAC2 STARD8 SYDE1 FGD2 PRR5-ARHGAP8 ARHGAP31 RHOC ARHGDIB RHOQ ARHGAP15 RHOJ ARHGAP10 ARHGAP6 ARHGAP29 ARHGAP30 RHOH PLEKHG2 ARHGEF6 SRGAP1 VAV1 FGD4 ARHGAP17 ARHGAP18 ARAP1 VAV3 FGD3 ARHGAP4 NET1 OPHN1 TIAM2 RHOA DEPDC1B ARHGAP19 ARHGEF16 ARHGAP25 ARAP3 SOS2 A2M ARHGAP8	c2.cp
BIOCARTA_ETS_PATHWAY	0.277228	0.529439	0.460859	1.16654	1567	18	CSF1 FOS CSF1R RBL1 ETS1 JUN E2F4 RBL2	c2.cp
KEGG_DRUG_METABOLISM_OTHER_ENZYMES	0.278227	0.53037	0.385969	1.13609	1719	37	CES1 CDA UGT2A1 CYP3A5 CYP3A4 DPYD TYMP NAT1 TK1 UPP2 NAT2	c2.cp
REACTOME_PKA_MEDIATED_PHOSPHORYLATION_OF_CREB	0.27918	0.53121	-0.43145	-1.14676	1238	16	ADCY1 ADCY7 PRKACA ADCY6 PRKAR1A ADCY5 PRKACB	c2.cp
PID_LIS1_PATHWAY	0.279734	0.53129	-0.370233	-1.12504	1135	28	CDK5R2 RELN MAP1B PAFAH1B1 PLA2G7 DCX DYNC1H1 CDK5R1 VLDLR	c2.cp
PID_S1P_S1P2_PATHWAY	0.282505	0.535572	0.424389	1.14792	1659	24	FOS GNA13 CDH5 GNA14 ELK1 GNA12 GNAI3 JUN RHOA	c2.cp
KEGG_TYROSINE_METABOLISM	0.283621	0.536705	0.379984	1.1296	1760	39	AOX1 ADH1B ADH1C HPD TYR IL4I1 ADH6 TAT MAOA AOC2	c2.cp
BIOCARTA_NO1_PATHWAY	0.286648	0.541446	0.402601	1.13266	1710	29	KDR FLT1 NOS3 CAV1 VEGFA PRKG1 PDE3A FLT4	c2.cp
SA_TRKA_RECEPTOR	0.287319	0.541728	0.463515	1.15715	1610	17	CDKN1A NGFR NGF ELK1 SHC1 RHOA PIK3CA SOS1	c2.cp
PID_HDAC_CLASSI_PATHWAY	0.289153	0.544195	0.34147	1.11171	1897	65	NFKBIA TNFRSF1A TNF RELA GATA2 HDAC1 SIRT4 SIRT1 KAT2B STAT3 SIRT7 SAP30 NFKB1 XPO1 MAX MBD3 SMAD7 HDAC8 MTA2 HDAC7 MBD2 MXD1 PPARG NR2C1 RBBP7 SMG5 RANBP2 GATAD2A	c2.cp
REACTOME_CLEAVAGE_OF_GROWING_TRANSCRIPT_IN_THE_TERMINATION_REGION_	0.29039	0.545532	0.372581	1.12397	1818	42	U2AF1 PAPOLA SNRPG PCF11 LSM10 SRSF1 CPSF2 CSTF3 MAGOH SNRPE ZNF473 NCBP2 SRSF7 SRSF3 PABPN1 SRSF4 SRSF9 SNRPF SRSF11 UPF3B SNRPD3 U2AF2 CSTF1 SLBP SRSF5	c2.cp
REACTOME_NEUROTRANSMITTER_RELEASE_CYCLE	0.291321	0.546292	-0.351152	-1.10568	1157	32	SLC5A7 SYN3 SLC32A1 STX1A SLC1A6 SLC17A7 GAD2 SYT1 SNAP25 RAB3A RIMS1 STXBP1 SYN2 VAMP2	c2.cp
PID_WNT_SIGNALING_PATHWAY	0.29609	0.550608	0.406949	1.12694	1756	27	FZD2 FZD9 FZD1 WNT3 IGFBP4 DKK1 FZD8 FZD4 LRP5 FZD5 FZD10 FZD7 RYK	c2.cp
REACTOME_ACTIVATION_OF_THE_PRE_REPLICATIVE_COMPLEX	0.295526	0.550608	0.397641	1.12632	1776	30	CDK2 CDC45 ORC1 RPA4 POLA1 MCM5 CDC6 MCM7 MCM8 DBF4 PRIM2 MCM3 MCM10	c2.cp
REACTOME_METAL_ION_SLC_TRANSPORTERS	0.296277	0.550608	0.429863	1.1393	1718	22	CP SLC11A1 HEPH SLC30A1 SLC39A1 SLC41A1 SLC40A1 SLC39A8 SLC30A7	c2.cp
REACTOME_PYRUVATE_METABOLISM	0.295615	0.550608	0.453295	1.1474	1671	18	PDK4 SLC16A3 SLC16A1	c2.cp
REACTOME_PHASE_II_CONJUGATION	0.295989	0.550608	0.349889	1.11126	1925	55	MAT1A ACSM1 SULT1B1 SULT1C2 MGST1 GGT5 UGT2A1 PAPSS2 SULT1E1 SULT1C4 MGST2 SULT1A3 GSTP1 NAT1 NAT2 CYP1A2 NNMT	c2.cp
REACTOME_NEF_MEDIATES_DOWN_MODULATION_OF_CELL_SURFACE_RECEPTORS_BY_RECRUITING_THEM_TO_CLATHRIN_ADAPTERS	0.297917	0.552665	0.434206	1.13775	1715	21	LCK CD4 CD28 B2M	c2.cp
REACTOME_LOSS_OF_NLP_FROM_MITOTIC_CENTROSOMES	0.305007	0.562798	-0.307221	-1.08144	1065	55	TUBB4A NEK2 TUBA1A PAFAH1B1 DCTN1 YWHAG TUBA4A PLK4 TUBG1 DYNC1H1 CEP164 CEP41 TUBB DCTN2 PRKACA PPP2R1A CEP192 CEP72 CEP250 ACTR1A HAUS2 TUBB4B CKAP5 CEP63 CSNK1D CLASP1	c2.cp
REACTOME_POST_CHAPERONIN_TUBULIN_FOLDING_PATHWAY	0.304437	0.562798	-0.41677	-1.12342	1337	17	TUBB3 TUBB2A TUBA1B TUBB4A TUBA1A TUBA4A	c2.cp
REACTOME_SCFSKP2_MEDIATED_DEGRADATION_OF_P27_P21	0.304859	0.562798	0.349383	1.10248	1969	53	CDK2 CDKN1A CCNA2 PSMB8 PSMB9 CKS1B RPS27A PSME1 CDKN1B PSMB1	c2.cp
REACTOME_CHOLESTEROL_BIOSYNTHESIS	0.310467	0.571854	-0.392007	-1.1125	1316	21	HMGCS1 IDI2 TM7SF2 DHCR24 HMGCR MVK MVD NSDHL CYP51A1 IDI1	c2.cp
BIOCARTA_TFF_PATHWAY	0.311266	0.572311	0.434664	1.1279	1781	20	EGFR ITGB1 PIK3CG SHC1 RHOA GHR PIK3CA SOS1 BAD APAF1	c2.cp
REACTOME_G2_M_CHECKPOINTS	0.31652	0.580941	0.366765	1.10333	1982	41	CDK2 WEE1 CHEK2 CDC45 ORC1 CDC25A MCM5 CDC6 MCM7 RFC4 CHEK1 MCM8 DBF4 CDK1 ATM MCM3 MCM10	c2.cp
BIOCARTA_GCR_PATHWAY	0.323373	0.59247	0.443598	1.12285	1828	18	NOS3 RELA ANXA1 ADRB2 PIK3CG NFKB1	c2.cp
KEGG_DILATED_CARDIOMYOPATHY	0.327842	0.59641	0.315952	1.0778	2228	88	ITGA10 PRKX TNF TGFB1 ITGA5 TNNC1 ITGB4 ITGA1 ITGB8 TGFB2 MYH7 TGFB3 ITGB1 ITGB5 LAMA2 ITGA6 ITGAV CACNG6 MYL3 LMNA SGCD ITGA8 TPM2 ITGA11 ITGB3 ADCY4 ITGA7 MYH6 ITGB7	c2.cp
BIOCARTA_CERAMIDE_PATHWAY	0.327473	0.59641	0.418812	1.11001	1899	22	TNFRSF1A RELA BCL2 MAP3K1 NFKB1 CASP8 TRAF2 RIPK1 BAD RAF1	c2.cp
PID_BARD1_PATHWAY	0.327723	0.59641	0.394523	1.09985	1946	28	CDK2 FANCC FANCE BARD1 PCNA TP53 FANCL RAD51 ATM UBE2D3 BRCA1 UBE2L3	c2.cp
REACTOME_O_LINKED_GLYCOSYLATION_OF_MUCINS	0.328399	0.59641	-0.309735	-1.06461	1197	48	GALNT5 MUC5AC MUC6 WBSCR17 MUC5B GCNT4 B3GNTL1 GALNT12 GCNT1 GALNT13 GALNT9 GALNTL6 GALNT11 ST3GAL3	c2.cp
REACTOME_INSULIN_SYNTHESIS_AND_PROCESSING	0.328348	0.59641	-0.40403	-1.10321	1426	18	PCSK1 STX1A SNAP25 PCSK2 VAMP2 MYO5A EXOC8 EXOC3 EXOC6	c2.cp
REACTOME_CLASS_I_MHC_MEDIATED_ANTIGEN_PROCESSING_PRESENTATION	0.338624	0.613903	0.275275	1.05795	2666	231	SOCS3 MRC1 FCGR1A NCF2 HLA-G NCF4 CYBA CTSS UBE2C CYBB FCGR1B MRC2 TRIM63 DTX3L B2M RNF144B HLA-B TAP1 PSMB8 LRR1 ITGB5 ITGAV RNF182 TRIM21 PSMB9 FBXO2 SOCS1 CDC26	c2.cp
KEGG_NICOTINATE_AND_NICOTINAMIDE_METABOLISM	0.339538	0.614487	0.414354	1.0982	1969	22	AOX1 PNP BST1 ENPP1 NAMPT NT5C1B	c2.cp
KEGG_MTOR_SIGNALING_PATHWAY	0.340934	0.615514	0.345845	1.0788	2182	50	DDIT4 PGF EIF4EBP1 PIK3R5 VEGFA RPS6 PIK3CG VEGFC CAB39L VEGFB HIF1A RICTOR RPS6KA1 PIK3CA	c2.cp
KEGG_LONG_TERM_POTENTIATION	0.343667	0.615514	-0.287472	-1.05122	1163	67	GRM5 CAMK4 CALML3 ADCY1 GRIN2B PRKCG CALM3 GRIN1 PLCB1 GRIN2A PRKCB PPP3R1 CAMK2D PPP3CB ITPR1 CALM1 MAP2K1 GRM1 CAMK2B CACNA1C PLCB4 PRKACA MAPK1 CAMK2A GRIA1 CAMK2G CALM2 KRAS PRKACB BRAF PPP3CA GRIA2 PPP3R2 CHP2 GRIN2C	c2.cp
PID_ILK_PATHWAY	0.342668	0.615514	0.35253	1.08075	2177	45	PARVG PXN SNAI1 IQGAP1 ARHGEF6 LIMS1 TNS1 PPP1R14B CCND1 XPO1 JUN RICTOR ILK NACA PARVA HSP90AA1 ILKAP CREB1 ZEB1	c2.cp
REACTOME_ORC1_REMOVAL_FROM_CHROMATIN	0.342017	0.615514	0.329827	1.0738	2244	65	CDK2 CDKN1A CCNA2 PSMB8 ORC1 PSMB9 RPS27A PSME1 MCM5 CDC6 MCM7 CDKN1B RB1 MCM8 PSMB1	c2.cp
REACTOME_GABA_RECEPTOR_ACTIVATION	0.342873	0.615514	-0.30524	-1.05692	1233	50	GABRA6 KCNJ12 ADCY1 GABRG3 ADCY7 ARHGEF9 GNG3 KCNJ9 GABRB2 GABBR2 GABBR1 GABRA1 GABRA3 GABRG2 KCNJ3	c2.cp
REACTOME_DNA_REPLICATION	0.34315	0.615514	0.282789	1.06014	2609	180	CDK2 CDKN1A GMNN CCNA2 CENPA AURKB DNA2 CDC45 PSMB8 PPP1CC RPS27 ORC1 FBXO5 STAG2 STAG1 MAPRE1 PSMB9 POLD1 PPP2R1B PCNA RPA4 POLA1 RPS27A PSME1 MCM5 XPO1 BIRC5 CDC6 AHCTF1 MCM7 CDKN1B RB1 NUP37 RFC4 MCM8 PSMB1 NSL1 DBF4 RCC2 PMF1 KIF18A PRIM2 CENPQ B9D2 SMC3 BUB3 MCM3 NUDC PSME2 RAD21 MCM10 KIF2C PPP2CB UBA52 POLD4 PPP2R5A PSMA2 POLD2 RANBP2 KIF20A PLK1 CENPM PSMD6 POLE2 CENPK	c2.cp
ST_WNT_CA2_CYCLIC_GMP_PATHWAY	0.345502	0.617301	0.421105	1.09271	1977	20	SLC6A13 CFB ITPKB ITPR2 ITPR3 PDE6G PDE6A	c2.cp
PID_ERBB_NETWORK_PATHWAY	0.345855	0.617301	0.455164	1.10326	1914	15	AREG EGFR ERBB2	c2.cp
KEGG_GLYCOSAMINOGLYCAN_BIOSYNTHESIS_HEPARAN_SULFATE	0.347688	0.619506	-0.359376	-1.07188	1420	26	HS6ST2 EXTL1 HS3ST5 GLCE HS3ST2 NDST1 EXTL3 NDST3 EXTL2 HS6ST3 B3GALT6 XYLT1 HS3ST1 B4GALT7 NDST4	c2.cp
REACTOME_GLYCOSPHINGOLIPID_METABOLISM	0.354913	0.631295	-0.33137	-1.05694	1386	34	STS NEU3 ARSF GBA SMPD3 ASAH2 ARSB ARSG GAL3ST1 SUMF2 NEU4 ARSA PSAP ARSJ GBA2 SMPD1 GM2A	c2.cp
REACTOME_DOWNREGULATION_OF_TGF_BETA_RECEPTOR_SIGNALING	0.355903	0.631971	0.413219	1.08276	2049	21	TGFB1 TGFBR2 TGFBR1 PPP1CC RPS27A XPO1 SMURF2 SMAD7 SMAD2 UBA52 PPP1R15A PPP1CB PMEPA1 STUB1	c2.cp
BIOCARTA_PGC1A_PATHWAY	0.357857	0.633273	-0.371959	-1.06992	1502	22	CAMK4 CALM3 MEF2D CAMK2D PPP3CB CALM1 CAMK2B YWHAH CAMK2A MEF2A MEF2C CAMK2G CALM2 PPP3CA	c2.cp
PID_SYNDECAN_2_PATHWAY	0.357392	0.633273	0.378952	1.07338	2148	30	EZR TGFB1 ITGA5 SDC2 CAV2 ITGB1 FN1 MMP2 LAMA3 SDCBP LAMA1	c2.cp
REACTOME_BASIGIN_INTERACTIONS	0.362662	0.640682	0.398048	1.07668	2130	24	SLC7A7 SLC16A3 SLC7A9 CAV1 SLC16A1 SLC7A11 ITGB1 SLC3A2	c2.cp
REACTOME_PI_3K_CASCADE	0.364673	0.643139	0.340971	1.0636	2334	50	CDKN1A FGF23 FGF2 FOXO1 FGF17 FGFR4 GAB1 FOXO4 CDKN1B FGF18 RICTOR CHUK FGF10 PIK3CA FGFR3 BAD PHLPP1 FRS2 AKT1S1 FGFR1 CREB1	c2.cp
PID_SYNDECAN_3_PATHWAY	0.365385	0.6433	0.44234	1.08874	2032	16	EGFR AGRP MC4R PTN FYN POMC	c2.cp
SIG_PIP3_SIGNALING_IN_CARDIAC_MYOCTES	0.366039	0.64336	0.323264	1.05547	2409	66	CDK2 SFN PARD3 MYC PIK3R5 SLC2A4 CDKN2A GADD45A GAB1 INPPL1 IFI27 PAK4 F2RL2 PAK2 CDKN1B SHC1 RPS6KA1 SOS2 PIK3CA MET IRS2 BCL2L1 SOS1 BAD IRS1 PREX1 CREB1	c2.cp
REACTOME_CELL_CYCLE_CHECKPOINTS	0.372747	0.652936	0.296167	1.04616	2625	111	CDK2 CDKN1A WEE1 UBE2C CHEK2 CDC45 PSMB8 ORC1 PSMB9 CDC26 CDC25A RPS27A PSME1 MCM5 CDC6 TP53 MCM7 CDKN1B RFC4 CHEK1 MCM8 PSMB1 ANAPC11 DBF4 CDK1 ATM CDC16 BUB3 MCM3 PSME2 MCM10 UBA52 PSMA2	c2.cp
REACTOME_G_BETA_GAMMA_SIGNALLING_THROUGH_PI3KGAMMA	0.372362	0.652936	0.395398	1.06951	2187	24	GNG11 GNG12 GNG5 PIK3R5 PIK3CG GNG8 GNG10 RHOA GNGT2 PIK3R6	c2.cp
REACTOME_MEMBRANE_TRAFFICKING	0.375751	0.657089	0.292116	1.04485	2689	122	GJB2 VAMP8 GJA4 GJA3 GJA1 GJB6 TPD52L1 GJA5 DAB2 SNAP23	c2.cp
KEGG_HISTIDINE_METABOLISM	0.377827	0.659607	-0.348346	-1.0507	1536	27	UROC1 ACY3 HDC CNDP1 ALDH1B1 ALDH1A3 AMDHD1	c2.cp
BIOCARTA_CREB_PATHWAY	0.381943	0.662699	-0.35014	-1.04433	1560	26	ADCY1 PRKCB CAMK2D CAMK2B PIK3R1 MAPK1 CAMK2A PRKAR1A CAMK2G PRKACB	c2.cp
REACTOME_PROCESSIVE_SYNTHESIS_ON_THE_LAGGING_STRAND	0.381795	0.662699	0.442745	1.07316	2113	15	DNA2 POLD1 PCNA POLA1 PRIM2 POLD4 POLD2	c2.cp
REACTOME_ADP_SIGNALLING_THROUGH_P2RY1	0.380531	0.662699	0.392731	1.06229	2235	24	GNG11 GNG12 GNG5 GNA14 GNG8 GNG10 P2RY1 GNGT2	c2.cp
REACTOME_PLATELET_AGGREGATION_PLUG_FORMATION	0.382154	0.662699	0.365708	1.05284	2316	33	SYK ADRA2B VWF APBB1IP FN1 RAP1A RAP1B TLN1 RAPGEF3 ITGB3 SHC1 GP1BB GP9	c2.cp
REACTOME_DESTABILIZATION_OF_MRNA_BY_AUF1_HNRNP_D0	0.38357	0.664044	0.336032	1.04819	2455	50	HSPB1 HSPA1B PSMB8 PSMB9 RPS27A PSME1 PABPC1 PSMB1	c2.cp
REACTOME_PROCESSING_OF_CAPPED_INTRONLESS_PRE_MRNA	0.386578	0.668135	0.395273	1.05753	2257	23	PAPOLA SNRPG PCF11 LSM10 CPSF2 CSTF3 SNRPE ZNF473 NCBP2 PABPN1 SNRPF SNRPD3 CSTF1 SLBP	c2.cp
REACTOME_REGULATION_OF_MITOTIC_CELL_CYCLE	0.388383	0.670138	0.311649	1.04093	2600	77	CDK2 UBE2C CCNA2 CDC14A AURKB PSMB8 FBXO5 PSMB9 CDC26 PTTG1 RPS27A PSME1 PSMB1 ANAPC11 CDK1 CDC16 BUB3 PSME2 SKP2 UBA52 PSMA2 PLK1 PSMD6	c2.cp
REACTOME_G_PROTEIN_BETA_GAMMA_SIGNALLING	0.390125	0.672025	0.378397	1.04787	2314	27	GNG11 GNG12 GNG5 PIK3R5 PLCB3 PIK3CG GNG8 GNG10 RHOA GNGT2 PIK3R6 PLCB2	c2.cp
REACTOME_SEMA4D_IN_SEMAPHORIN_SIGNALING	0.39082	0.672107	0.36965	1.04703	2349	30	PTPRC RAC2 RHOC ERBB2 RRAS ROCK1 LIMK2 CD72 PLXNB1 RHOA MYL6 MYH9 MET	c2.cp
REACTOME_AXON_GUIDANCE	0.393523	0.675635	-0.230115	-1.01595	801	240	SEMA3E SPTB ST8SIA2 CNTN6 CACNA1S TRPC5 SCN5A ANK1 SCN2B PRKCQ SLIT3 LIMK1 SPTBN2 PAK1 DPYSL5 CNTNAP1 HFE2 CACNA1G SCN1B ROBO2 SCN8A SCN3B GPC1 ANK3 CACNB1 COL9A3 SPTBN5 CACNA1H SCN2A MYH11 SLIT1 KCNQ3 NTN4 L1CAM DNM1 KCNQ2 KIF4B MYH10 ARHGEF11 GFRA2 DLG3 CAP2 TRPC3 PAK6 DCX AGRN SEMA4D CLTC LAMB1 GFRA4 SH3GL2 CNTN2 COL9A2 SEMA7A PITPNA GDNF ABLIM3 CACNB3 CDK5R1 NRCAM PFN2 CD24 SPTBN4 SRGAP2 MAP2…	c2.cp
REACTOME_MHC_CLASS_II_ANTIGEN_PRESENTATION	0.397289	0.679849	0.303499	1.0332	2695	87	HLA-DMB HLA-DRB1 HLA-DRB5 CTSS HLA-DQA1 HLA-DPA1 CD74 HLA-DPB1 HLA-DMA CTSK CTSC KIF5B HLA-DOA CTSH KIF5A HLA-DQA2	c2.cp
REACTOME_FGFR_LIGAND_BINDING_AND_ACTIVATION	0.397277	0.679849	0.418655	1.05971	2246	18	FGF23 FGF2 FGF17 FGFR4	c2.cp
REACTOME_TRNA_AMINOACYLATION	0.398609	0.680984	-0.307542	-1.02615	1489	42	AARS2 IARS FARSA FARSB VARS2 VARS SARS SARS2 NARS WARS EARS2 QARS AARS YARS GARS CARS MARS2 AIMP2 TARS2 RARS2 IARS2 EPRS HARS RARS EEF1E1	c2.cp
REACTOME_NUCLEAR_SIGNALING_BY_ERBB4	0.399967	0.682181	0.36072	1.03848	2424	33	YAP1 GFAP PGR STAT5A TAB2	c2.cp
REACTOME_GLUCAGON_SIGNALING_IN_METABOLIC_REGULATION	0.401064	0.682929	0.365086	1.03872	2411	31	GCGR GNG11 GNG12 GNG5 GNG8 GNG10 ADCY4	c2.cp
PID_P38_MK2_PATHWAY	0.402778	0.684722	0.398116	1.04318	2319	21	HSPB1 SFN LSP1 MAPKAPK2	c2.cp
REACTOME_PPARA_ACTIVATES_GENE_EXPRESSION	0.409498	0.692767	0.295839	1.02992	2836	100	ANGPTL4 TEAD2 YAP1 WWTR1 G0S2 ABCA1 TEAD4 PLIN2 TEAD3 CTGF PPARA TEAD1 AGT RXRA TBL1X APOA1 MED21 NR1D1 PEX11A MED30 CPT1A TIAM2 MED13L RORA NCOA3 MED26 SMARCD3 MED11 MED23 PPARG GLIPR1 ACSL1 ABCB4 MED17 ARNTL TGS1 MED20 ACADM	c2.cp
REACTOME_SIGNALING_BY_BMP	0.409514	0.692767	0.390714	1.03554	2375	22	SMAD6 FSTL1 BMPR1B BMPR1A SMAD5 SMAD4 NOG SMURF2 SMAD7 CHRDL1	c2.cp
REACTOME_STRIATED_MUSCLE_CONTRACTION	0.409453	0.692767	0.380106	1.03698	2416	25	VIM TNNC1 TNNI2 MYBPC1 MYL4 TCAP MYL3 TPM2 TNNT1 TMOD1 MYH6 TNNC2	c2.cp
ST_ERK1_ERK2_MAPK_PATHWAY	0.420851	0.709631	0.359944	1.02409	2530	31	MAP3K8 MKNK2 ATF1 RAP1A KLF6 DUSP9 NFKB1 ARAF SHC1 RPS6KA1 SOS2 SOS1 BAD CREB1	c2.cp
REACTOME_G_PROTEIN_ACTIVATION	0.420634	0.709631	0.377259	1.02921	2482	25	GNG11 GNAT1 GNG12 GNG5 GNG8 GNAI3 GNG10 PDYN GNGT2 POMC GNAI2	c2.cp
PID_MET_PATHWAY	0.421928	0.710292	0.302956	1.01763	2839	80	HGF EIF4EBP1 INPP5D CDH1 PXN SNAI1 RIN2 RAP1A GAB1 INPPL1 RAP1B MAP3K1 PAK4 ETS1 F2RL2 JUN PAK2 SHC1 RHOA NCK1 PTPN2 CTNNA1 PIK3CA MET SOS1 BAD RAF1 ARF6	c2.cp
REACTOME_ER_PHAGOSOME_PATHWAY	0.423726	0.712162	0.318391	1.02108	2760	59	HLA-G B2M HLA-B TAP1 PSMB8 PSMB9 HLA-C RPS27A PSME1 HLA-F PSMB1 HLA-A SEC61B PSME2 SEC61A1 UBA52 PSMA2 PSMD6 SEC61G TAP2 HLA-K PSMB3 PDIA3 PSMD9 PSMC5 PSMB10 CALR PSMD10 PSMA7	c2.cp
REACTOME_REGULATION_OF_INSULIN_SECRETION_BY_GLUCAGON_LIKE_PEPTIDE1	0.4268	0.71501	0.343123	1.02002	2649	39	GNG11 GNG12 GNG5 GLP1R IQGAP1 ITPR2 ITPR3 RAP1A GNG8 RAP1B RAPGEF3 GNG10	c2.cp
REACTOME_GLUTATHIONE_CONJUGATION	0.426467	0.71501	-0.364106	-1.02122	1823	20	GSTA1	c2.cp
REACTOME_MRNA_3_END_PROCESSING	0.427676	0.715323	0.353117	1.01659	2592	33	U2AF1 PAPOLA PCF11 SRSF1 CPSF2 CSTF3 MAGOH NCBP2 SRSF7 SRSF3 PABPN1 SRSF4 SRSF9 SRSF11 UPF3B U2AF2 CSTF1 SRSF5 SRSF6 NCBP1 CPSF7	c2.cp
KEGG_TASTE_TRANSDUCTION	0.429268	0.71683	-0.313112	-1.00602	1671	35	GRM4 TAS2R13 TAS2R19 TAS2R8 CACNA1A GNG13 CACNA1B SCNN1G KCNB1 GNG3 PDE1A TAS2R3 TAS2R5	c2.cp
REACTOME_DNA_STRAND_ELONGATION	0.430234	0.717288	0.359832	1.01922	2586	30	DNA2 CDC45 POLD1 PCNA POLA1 MCM5 MCM7 RFC4 MCM8 PRIM2 MCM3 POLD4 POLD2	c2.cp
KEGG_CYSTEINE_AND_METHIONINE_METABOLISM	0.432954	0.719663	0.352098	1.01366	2624	33	MAT1A IL4I1 MPST ADI1 AHCYL2 AHCYL1 TAT SDS MAT2A	c2.cp
REACTOME_HS_GAG_BIOSYNTHESIS	0.433741	0.719663	0.361596	1.01729	2588	29	GPC3 GPC6 SDC2 HS3ST3A1 GPC4 HS3ST3B1 SDC4 HSPG2	c2.cp
REACTOME_SIGNALING_BY_FGFR_MUTANTS	0.43312	0.719663	0.340283	1.01755	2706	40	FGF23 FGF2 STAT5A FGF17 FGFR4 GAB1 STAT3 FGFR1OP2 FGF18 FGF10 PIK3CA STAT5B CNTRL FGFR3 SOS1 FRS2	c2.cp
REACTOME_INTRINSIC_PATHWAY_FOR_APOPTOSIS	0.436086	0.722399	0.360873	1.01526	2602	29	CASP7 BMF PMAIP1 BCL2L11 BCL2 TP53 CASP8 BID BCL2L1 BAD DYNLL1 APAF1	c2.cp
REACTOME_MUSCLE_CONTRACTION	0.438924	0.72594	0.332233	1.01233	2773	44	VIM TNNC1 ITGA1 CALD1 TNNI2 MYBPC1 MYL4 TCAP ITGB5 MYL3 SORBS3 TLN1 TPM2 TNNT1 VCL TMOD1 MYH6 TNNC2 SORBS1 MYL6	c2.cp
BIOCARTA_VIP_PATHWAY	0.442826	0.730064	0.370258	1.01011	2613	25	NFKBIA MYC RELA NFATC2 NFATC1 MAP3K1 NFKB1	c2.cp
PID_MTOR_4PATHWAY	0.442148	0.730064	0.306058	1.0074	2930	69	DDIT4 CDK2 SFN SGK1 EIF4EBP1 PXN	c2.cp
REACTOME_NETRIN1_SIGNALING	0.446674	0.735239	-0.306478	-0.99998	1691	38	TRPC5 PRKCQ SLIT3 HFE2 SLIT1 NTN4 TRPC3 PITPNA ABLIM3 UNC5D DCC UNC5A RGMB PTK2 SLIT2 CDC42 UNC5B ABLIM1	c2.cp
BIOCARTA_IGF1_PATHWAY	0.450868	0.736299	0.384013	1.00623	2596	21	FOS PIK3CG ELK1 JUN SHC1 IGF1R PIK3CA SOS1 RAF1 IRS1	c2.cp
PID_ECADHERIN_NASCENT_AJ_PATHWAY	0.450113	0.736299	0.338898	1.00338	2796	38	CDH1 IQGAP1 JUP RAP1A WASF2 RAP1B CCND1 ENAH RHOA ITGB7 CTNNA1 PIK3CA TJP1 ITGAE ARF6 ABI1	c2.cp
REACTOME_SYNTHESIS_OF_PA	0.448211	0.736299	0.375854	1.00558	2617	23	PLA2G2A GPAM AGPAT2	c2.cp
REACTOME_GASTRIN_CREB_SIGNALLING_PATHWAY_VIA_PKC_AND_MAPK	0.45063	0.736299	0.26794	1.00621	3431	184	PROKR1 AGTR1 GPR4 FPR2 GCGR RGS18 PTGFR EDN1 GPR65 FFAR2 OXTR GNG11 GNRH1 GNG12 EGFR GNG5 ANXA1 F2RL1 MMP3 TACR3 LPAR6 F2RL3 PTGER1 P2RY6 ITPR2 PRKCH F2R PLCB3 ITPR3 XCL1 GNA14 RGS2 P2RY2 PTAFR EDNRB GAST NMUR2	c2.cp
REACTOME_NEPHRIN_INTERACTIONS	0.44965	0.736299	-0.364176	-1.00785	1928	19	NPHS1 KIRREL2 ACTN2 SPTAN1 PIK3R1 KIRREL3 SPTBN1 PIK3CB MAGI2	c2.cp
REACTOME_ACTIVATION_OF_CHAPERONE_GENES_BY_XBP1S	0.451741	0.736564	0.329845	1.00505	2854	44	KDELR3 DDX12P SULT1A3 DDX11 WFS1 TLN1 CTDSP2 LMNA HDGF SERP1 DNAJC3 XBP1 SHC1 TPP1 ACADVL WIPI1 FKBP14 PDIA6 CXXC1	c2.cp
BIOCARTA_STATHMIN_PATHWAY	0.453324	0.736829	0.400934	1.01486	2563	18	CD3E CD2 CD3D	c2.cp
ST_GA13_PATHWAY	0.453087	0.736829	0.344381	1.00156	2766	35	NFKBIA NFKB2 CFB GNA13 ROCK1 BCL2 MAP3K1 NFKB1 TBXA2R MAP3K5 NFKBIB RDX PLD2 NFKBIL1 PHKA2	c2.cp
BIOCARTA_MPR_PATHWAY	0.461755	0.747457	0.348654	0.996637	2782	32	PGR PAQR5 ARPC1B	c2.cp
BIOCARTA_ATRBRCA_PATHWAY	0.462009	0.747457	0.384644	0.998105	2644	20	CHEK2 FANCC FANCE TP53 CHEK1 RAD51 ATM BRCA2 BRCA1 TREX1	c2.cp
SIG_CHEMOTAXIS	0.462025	0.747457	0.327808	0.998841	2919	44	PITX2 BTK PIK3R5 ITPR2 ITPR3 ROCK1 PIK3CG INPPL1 RPS4X PAK4 ARHGAP4 PAK2	c2.cp
PID_PI3KCI_AKT_PATHWAY	0.463566	0.748782	0.341347	0.992741	2830	35	CDKN1A SFN FOXO1 SLC2A4 FOXO4 CDKN1B RICTOR MAP3K5 CHUK BCL2L1 BAD RAF1 HSP90AA1 TBC1D4	c2.cp
BIOCARTA_MCM_PATHWAY	0.464993	0.748926	0.396766	1.00431	2629	18	CDK2 ORC1 MCM5 CDC6 MCM7 CDKN1B	c2.cp
REACTOME_CYTOSOLIC_TRNA_AMINOACYLATION	0.465099	0.748926	-0.338694	-0.991877	1918	24	IARS FARSA FARSB VARS SARS NARS WARS QARS AARS YARS GARS CARS AIMP2 EPRS HARS RARS EEF1E1	c2.cp
REACTOME_P53_DEPENDENT_G1_DNA_DAMAGE_RESPONSE	0.467038	0.750881	0.314859	0.993541	3017	53	CDK2 CDKN1A PSMB8 PSMB9 RPS27A PSME1 TP53 CDKN1B PSMB1 ATM PSME2 UBA52 PSMA2 PSMD6	c2.cp
KEGG_HOMOLOGOUS_RECOMBINATION	0.468977	0.752028	0.36092	0.99302	2773	26	POLD1 RPA4 TOP3B RAD52 RAD51 BLM RAD51B RAD54B POLD4 BRCA2 POLD2	c2.cp
REACTOME_G_ALPHA_Q_SIGNALLING_EVENTS	0.469202	0.752028	0.269099	0.99753	3503	163	PROKR1 AGTR1 GPR4 FPR2 GCGR RGS18 PTGFR EDN1 GPR65 FFAR2 OXTR GNG11 GNRH1 GNG12 GNG5 ANXA1 F2RL1 TACR3 LPAR6 F2RL3 PTGER1 P2RY6 ITPR2 PRKCH F2R PLCB3 ITPR3 XCL1 GNA14 RGS2 P2RY2 PTAFR EDNRB GAST NMUR2	c2.cp
BIOCARTA_PDGF_PATHWAY	0.470549	0.753024	0.346674	0.990978	2835	32	FOS STAT5A PIK3CG ELK1 MAP3K1 STAT3 PDGFRA JUN SHC1 PIK3CA STAT5B SOS1 RAF1	c2.cp
KEGG_ALDOSTERONE_REGULATED_SODIUM_REABSORPTION	0.47184	0.753926	0.331394	0.990964	2948	40	HSD11B2 SCNN1A SFN SGK1 PIK3R5 FXYD2 ATP1A2 PIK3CG	c2.cp
REACTOME_PLATELET_HOMEOSTASIS	0.474361	0.756788	0.29816	0.992642	3172	75	FGR PECAM1 NOS3 GNG11 GNG12 GNG5 PTPN6 ORAI1 ITPR2 ITPR3 PRKG1 PDE3A GNG8 MRVI1 PPP2R1B PDE6G PDE5A KCNMB3 PTGIR APOB GNG10	c2.cp
REACTOME_OTHER_SEMAPHORIN_INTERACTIONS	0.475889	0.75806	0.409975	0.993726	2634	15	TYROBP ITGA1 TREM2 ITGB1	c2.cp
KEGG_PENTOSE_PHOSPHATE_PATHWAY	0.479578	0.761739	0.364262	0.985288	2817	24	ALDOB TKTL1 PGM2 DERA FBP1 TKTL2 PGLS RPE PGM1 RBKS	c2.cp
REACTOME_PROSTACYCLIN_SIGNALLING_THROUGH_PROSTACYCLIN_RECEPTOR	0.479668	0.761739	0.391957	0.992136	2712	18	GNG11 GNG12 GNG5 GNG8 PTGIR GNG10 GNGT2	c2.cp
BIOCARTA_CXCR4_PATHWAY	0.482965	0.761966	0.365909	0.978971	2820	23	CXCR4 RELA PXN	c2.cp
BIOCARTA_MYOSIN_PATHWAY	0.48266	0.761966	0.349395	0.982969	2880	29	ARHGEF5 ARHGEF19 GNA13 ROCK1 ARHGAP5 ARHGEF6 GNA12 ARHGEF10 PKN1	c2.cp
SIG_IL4RECEPTOR_IN_B_LYPHOCYTES	0.483485	0.761966	0.354717	0.982298	2868	27	IL4R BCL2 SOCS1 SHC1 SOS2 PIK3CA IRS2 MAP4K1 SOS1 BAD RAF1 IRS1	c2.cp
PID_SMAD2_3PATHWAY	0.482968	0.761966	0.394396	0.984595	2707	17	SMAD4 MAP3K1 CTDSP2 CTDSP1 CTDSPL PIAS4 SMAD2	c2.cp
PID_EPHA2_FWD_PATHWAY	0.480917	0.761966	0.384422	0.98641	2746	19	EPHA2 EFNA1 INPPL1 VAV3 SHC1 RHOA PIK3CA	c2.cp
BIOCARTA_AGR_PATHWAY	0.485672	0.763838	0.335782	0.976555	2965	35	ITGA1 EGFR PXN SP1 ITGB1 LAMA2 RAPSN LAMA3 PAK4 LAMA4 JUN PAK2	c2.cp
PID_WNT_NONCANONICAL_PATHWAY	0.486146	0.763838	0.342602	0.97934	2929	32	FZD2 NFATC2 YES1 ROCK1 TAB2 FZD5 FZD7 RHOA WNT5A MAP3K7 PPARG FZD6	c2.cp
REACTOME_NUCLEAR_RECEPTOR_TRANSCRIPTION_PATHWAY	0.488882	0.765284	0.319755	0.982724	3099	46	PGR NR2E1 PPARA NR2E3 NR0B1 NR5A2 RXRG NR2F1 RXRA NR1H3 NR1D1 HNF4G RARG RORA	c2.cp
REACTOME_NCAM_SIGNALING_FOR_NEURITE_OUT_GROWTH	0.488503	0.765284	0.301825	0.98149	3207	64	COL1A1 COL2A1 COL1A2 COL6A2 COL6A3 COL3A1	c2.cp
REACTOME_LIPID_DIGESTION_MOBILIZATION_AND_TRANSPORT	0.48928	0.765284	0.327699	0.979916	3057	40	ABCA1 PLTP CAV1 LPL PLIN1 FABP4 CUBN PPP1CC ABHD5 HSPG2 LCAT APOA1 BMP1 APOB LIPC	c2.cp
ST_G_ALPHA_S_PATHWAY	0.493047	0.768992	0.405254	0.982283	2729	15	CFB GAST RAPGEF3 RAF1 CREB1	c2.cp
REACTOME_SIGNALING_BY_CONSTITUTIVELY_ACTIVE_EGFR	0.493134	0.768992	0.391419	0.977163	2764	17	EGFR GAB1 RPS27A SHC1 PIK3CA SOS1 UBA52 HSP90AA1 CBL PLCG1	c2.cp
REACTOME_PROTEOLYTIC_CLEAVAGE_OF_SNARE_COMPLEX_PROTEINS	0.495043	0.77081	-0.364208	-0.968033	2196	16	VAMP1 STX1A STX1B SNAP25 VAMP2	c2.cp
ST_GA12_PATHWAY	0.49649	0.771905	0.361276	0.966578	2899	23	CFB BTK F2RL1 F2RL3 VAV1 F2RL2 JUN	c2.cp
REACTOME_ADP_SIGNALLING_THROUGH_P2RY12	0.497293	0.771995	0.37292	0.967682	2846	20	GNG11 GNG12 GNG5 GNG8 GNAI3 GNG10 GNGT2 GNAI2	c2.cp
REACTOME_CONVERSION_FROM_APC_C_CDC20_TO_APC_C_CDH1_IN_LATE_ANAPHASE	0.498562	0.772809	0.396705	0.976421	2773	16	UBE2C CDC14A CDC26 ANAPC11 CDC16	c2.cp
REACTOME_SYNTHESIS_OF_BILE_ACIDS_AND_BILE_SALTS	0.501238	0.775151	0.384905	0.974286	2834	18	CYP39A1 CH25H ACOX2 HSD3B7 CYP27A1 HSD17B4 SLC27A2	c2.cp
REACTOME_SIGNALING_BY_FGFR1_MUTANTS	0.502865	0.775151	0.349863	0.968857	2983	27	FGF23 FGF2 STAT5A FGF17 STAT3 FGFR1OP2	c2.cp
REACTOME_GAB1_SIGNALOSOME	0.502034	0.775151	0.329714	0.965031	3084	36	CDKN1A EGFR FOXO1 GAB1 FOXO4 CDKN1B RICTOR CHUK PIK3CA BAD PHLPP1 AKT1S1 CREB1 PAG1 CSK	c2.cp
REACTOME_SHC_MEDIATED_CASCADE	0.503063	0.775151	0.357175	0.966119	2955	24	FGF23 FGF2 FGF17 FGFR4 FGF18 SHC1 FGF10 FGFR3 SOS1 FGFR1	c2.cp
KEGG_ONE_CARBON_POOL_BY_FOLATE	0.506866	0.778152	0.387463	0.967287	2841	17	MTHFD2 ALDH1L1 MTHFD2L MTHFS SHMT2 SHMT1 DHFR ATIC	c2.cp
KEGG_AMINOACYL_TRNA_BIOSYNTHESIS	0.506824	0.778152	-0.291278	-0.966728	1893	41	AARS2 IARS FARSA FARSB VARS2 VARS SARS SARS2 NARS WARS EARS2 QARS AARS YARS GARS CARS MARS2 TARS2 RARS2 IARS2 EPRS HARS RARS	c2.cp
SIG_INSULIN_RECEPTOR_PATHWAY_IN_CARDIAC_MYOCYTES	0.507262	0.778152	0.310621	0.968931	3247	50	SFN PARD3 FOXO1 SLC2A4 CDKN2A SERPINB6 INPPL1 F2RL2 SHC1 SORBS1 RPS6KA1 SOS2 PIK3CA IRS2 SOS1 RAF1 IRS1 IGFBP1 RPS6KB1 PIK3CD BRD4 CBL	c2.cp
KEGG_VALINE_LEUCINE_AND_ISOLEUCINE_DEGRADATION	0.510276	0.780527	0.319641	0.968823	3202	43	AOX1 IL4I1 BCAT2 ACAA2 ALDH2 HADHB HIBCH ALDH6A1 ALDH7A1 ALDH9A1 ALDH3A2 HIBADH HSD17B10 BCKDHB ACADS MUT HADH PCCA HADHA ACADM	c2.cp
BIOCARTA_BIOPEPTIDES_PATHWAY	0.513326	0.780527	-0.291629	-0.962434	1925	40	KNG1 CALM3 PRKCB CAMK2D MAPT CALM1 MAP2K1 CAMK2B STAT4 STAT1 MAPK1 CAMK2A MAPK8 GNB1 CAMK2G CALM2 PTK2B GNAI1	c2.cp
PID_LPA4_PATHWAY	0.511086	0.780527	-0.368066	-0.960523	2281	15	ADCY1 ADCY7 PRKCE PRKACA ADCY6 ADCY5	c2.cp
PID_RHOA_REG_PATHWAY	0.513216	0.780527	0.315868	0.968354	3261	45	ARHGEF5 ARHGDIB ARHGAP6 ARHGAP5 DEF6 SRGAP1 VAV1 ARAP1 ARHGEF10 VAV3 ARHGAP9 ARHGAP4 NET1 CDKN1B OPHN1 RHOA ARAP3 ARHGAP8	c2.cp
PID_THROMBIN_PAR1_PATHWAY	0.511093	0.780527	0.321057	0.965829	3201	41	NOS3 VASP GNA13 F2R PLCB3 ROCK1 GNA14 GNA12 GNAI3 F2RL2 PKN1 RHOA PIK3CA PLCB2 GNAI2	c2.cp
REACTOME_DARPP_32_EVENTS	0.512377	0.780527	-0.33215	-0.962746	2131	23	CALM3 PPP3R1 PPP3CB CALM1 PRKACA PPP2R1A PRKAR1A CALM2 PRKACB PPP3CA PDE4C PPP2R5D CDK5 PRKAR1B PPP2CA	c2.cp
KEGG_AMINO_SUGAR_AND_NUCLEOTIDE_SUGAR_METABOLISM	0.516329	0.783331	0.318401	0.965064	3240	43	HK3 HK2 NPL PGM2 GFPT2 UGDH RENBP GMDS GALK1 GCK CHIT1 PGM1	c2.cp
KEGG_GLYCOSAMINOGLYCAN_DEGRADATION	0.516681	0.783331	0.367784	0.954354	2957	20	HYAL2 HS3ST3A1 HS3ST3B1 HYAL1 HYAL4	c2.cp
REACTOME_DEVELOPMENTAL_BIOLOGY	0.518637	0.785148	0.244705	0.981675	4382	378	FOXH1 COL1A1 COL2A1 COL1A2 CEBPD PDX1 FOXA3 KLF5 PTPRC ANGPTL4 PCK1 NKX6-1 KLF4 NEUROG3 COL6A2 TYROBP TNF COL6A3 RAC2 EZR TGFB1 HES1 ITGA5 COL3A1 ITGA1 VASP EGFR CEBPB FOXO1 NR2F2 SLC2A4 RELA BOC TREM2 FES LPL RHOC PPARA PLIN1 ERBB2 RRAS MAFA FABP4 ITGB1 BNIP2 MSN ROCK1 PAX6	c2.cp
BIOCARTA_PTEN_PATHWAY	0.521393	0.787506	0.377815	0.956339	2948	18	FASLG ITGB1 CDKN1B SHC1 ILK PIK3CA SOS1	c2.cp
REACTOME_CYTOCHROME_P450_ARRANGED_BY_SUBSTRATE_TYPE	0.522473	0.787506	0.313331	0.96298	3312	46	CYP4B1 CYP1B1 TBXAS1 CYP39A1 CYP2C9 CYP3A5 CYP2J2 CYP3A4 CYP4F12 CYP1A2 CYP21A2 CYP4F2 CYP27A1 CYP11A1 CYP2F1	c2.cp
REACTOME_CELL_CYCLE_MITOTIC	0.522375	0.787506	0.248285	0.97773	4283	299	CDK2 CDKN1A WEE1 UBE2C GMNN MYC CDKN2C CCNA2 CDC14A CENPA AURKB CDKN2A DNA2 CDKN2B CDC45 NEDD1 LIN9 PSMB8 HDAC1 PPP1CC RPS27 ORC1 FBXO5 E2F5 STAG2 STAG1 MAPRE1 MYBL2 PSMB9 RBL1 POLD1 CKS1B PPP2R1B CDC26 CDC25A PCNA RPA4 POLA1 PTTG1 RPS27A PSME1 MCM5 CCND1 XPO1 OFD1 PPP2R3B BIRC5 CDC6 AHCTF1 CEP135 CDK4 MAX MCM7 CDKN1B RB1 NUP37 CCND3 RFC4 MCM8 PSMB1 ANAPC11 DHFR NSL1 CEP70 DBF4 RCC2 PMF1 KIF18A C…	c2.cp
KEGG_ETHER_LIPID_METABOLISM	0.525278	0.78944	0.344095	0.952884	3116	27	PLA2G2A ENPP6 LPCAT2 CHPT1	c2.cp
REACTOME_SIGNALING_BY_ERBB4	0.525022	0.78944	0.285507	0.963385	3545	82	CDKN1A YAP1 GFAP PGR EGFR FOXO1 STAT5A TAB2 FOXO4 RPS27A JAK2 CDKN1B SHC1 RICTOR WWOX GHR CHUK PIK3CA CDK1 STAT5B SOS1 BAD PHLPP1 RAF1 UBA52 PRLR AKT1S1 CREB1	c2.cp
REACTOME_AMINO_ACID_SYNTHESIS_AND_INTERCONVERSION_TRANSAMINATION	0.526097	0.789526	0.394065	0.955162	2912	15	GLUL PSAT1 PHGDH PSPH GPT2	c2.cp
REACTOME_GLYCOLYSIS	0.528269	0.791641	-0.315159	-0.950599	2148	27	PKLR TPI1P1 PFKFB1 ENO2 GAPDHS	c2.cp
REACTOME_FATTY_ACID_TRIACYLGLYCEROL_AND_KETONE_BODY_METABOLISM	0.531849	0.795855	0.260924	0.966898	3965	162	ANGPTL4 TEAD2 YAP1 WWTR1 ACADL G0S2 ABCA1 TEAD4 PLIN2 ACSL5 TEAD3 LPIN3 CTGF ELOVL7 PPARA TEAD1 SLC25A1 DECR1 SLC25A20 HADHB AGT RXRA TBL1X APOA1 ACACB GPAM AGPAT2 ECI1 MED21 NR1D1 PEX11A MED30 CPT1A TIAM2 ELOVL5 MED13L RORA LPIN1 CPT1B ACADVL GPAT2 ELOVL2 NCOA3 MED26 SMARCD3 MED11 MED23 PPARG ACADS GLIPR1 MUT ACSL1 ABCB4 HADH PCCA MED17 ARNTL TGS1 MED20 HADHA ACADM	c2.cp
REACTOME_ACTIVATED_AMPK_STIMULATES_FATTY_ACID_OXIDATION_IN_MUSCLE	0.536598	0.801805	0.373224	0.94472	3034	18	SLC25A20 ACACB CAB39L CPT1A CPT1B STRADB ACSL1 STK11 PRKAG2 PRKAB2	c2.cp
KEGG_VASOPRESSIN_REGULATED_WATER_REABSORPTION	0.545211	0.811885	-0.284495	-0.949248	2037	42	AVPR2 AVP DYNC1I1 NSF CREB3L1 DCTN1 VAMP2 DYNLL2 DYNC1H1 DCTN5 DCTN2 PRKACA DYNC2LI1 CREB3L3 DYNC1LI1 ADCY6	c2.cp
PID_AURORA_A_PATHWAY	0.544986	0.811885	0.330616	0.936468	3276	30	NFKBIA CENPA AURKB GADD45A BIRC5 TP53	c2.cp
REACTOME_G_BETA_GAMMA_SIGNALLING_THROUGH_PLC_BETA	0.545693	0.811885	0.365768	0.938544	3116	19	GNG11 GNG12 GNG5 PLCB3 GNG8 GNG10 GNGT2 PLCB2	c2.cp
KEGG_DNA_REPLICATION	0.552644	0.819874	0.318985	0.933628	3395	36	DNA2 RNASEH2C POLD1 PCNA RPA4 POLA1 MCM5 MCM7 RFC4 POLE4 PRIM2 MCM3 POLD4 POLD2 POLE2	c2.cp
KEGG_TIGHT_JUNCTION	0.553435	0.819874	0.265924	0.953029	3971	124	CLDN7 HCLS1 PARD3 RAB13 CLDN19 MYL12A CLDN22 CLDN5 YES1 CLDN15 CLDN23 RRAS CLDN14 TJP2 TJP3 MRAS MYLPF PRKCH MYH7 CLDN9 CLDN2 JAM2 F11R PPP2R1B RRAS2 OCLN PARD6B CLDN10	c2.cp
REACTOME_SHC1_EVENTS_IN_ERBB4_SIGNALING	0.552958	0.819874	-0.331531	-0.929856	2364	20	NRG1 EREG MAP2K1 YWHAB MAPK1 KRAS BTC NRG2 NRAS NRG4	c2.cp
REACTOME_LAGGING_STRAND_SYNTHESIS	0.555147	0.821238	0.363404	0.932479	3170	19	DNA2 POLD1 PCNA POLA1 RFC4 PRIM2 POLD4 POLD2	c2.cp
REACTOME_DEADENYLATION_OF_MRNA	0.556091	0.821461	0.371387	0.927156	3117	17	CNOT8 CNOT6 PABPC1 CNOT2 CNOT4 PAIP1 EIF4A3 EIF4A1 TNKS1BP1 CNOT3 EIF4B	c2.cp
BIOCARTA_ACH_PATHWAY	0.561826	0.828194	0.375733	0.9248	3125	16	FASLG PIK3CG RAPSN CHRNG PIK3CA CHRNB1 BAD	c2.cp
REACTOME_GLUCOSE_TRANSPORT	0.562246	0.828194	0.31659	0.926619	3454	36	HK3 HK2 SLC2A4 SLC2A1 G6PC NUP37 GCK SLC2A3 NUP205	c2.cp
BIOCARTA_EGF_PATHWAY	0.563851	0.829381	0.326126	0.927871	3390	31	FOS EGFR STAT5A ELK1 MAP3K1 STAT3 JUN SHC1 PIK3CA STAT5B SOS1 RAF1	c2.cp
BIOCARTA_PAR1_PATHWAY	0.567616	0.833736	0.315697	0.924003	3487	36	ARHGEF5 ARHGEF19 GNA13 F2RL3 F2R ROCK1 ARHGEF6 PIK3CG GNA12 ARHGEF10 RHOA ARHGEF16 PIK3CA MAP3K7	c2.cp
PID_HEDGEHOG_GLI_PATHWAY	0.570417	0.836665	0.302409	0.93301	3624	47	GLI1 GLI2 LGALS3 SMO HDAC1 GLI3 SAP30 GNAI3 XPO1 PTCH1 SPOP GNAI2 RAB23	c2.cp
REACTOME_PREFOLDIN_MEDIATED_TRANSFER_OF_SUBSTRATE_TO_CCT_TRIC	0.575728	0.843263	-0.310032	-0.924707	2352	26	TUBB3 TUBB2A TUBB4A TUBA1A TUBA4A	c2.cp
REACTOME_CYCLIN_A_B1_ASSOCIATED_EVENTS_DURING_G2_M_TRANSITION	0.58082	0.849521	0.375585	0.910369	3215	15	WEE1 CCNA2 CDC25A XPO1 CDK1 PLK1 CDK7 MNAT1 CDC25C CDC25B	c2.cp
KEGG_LYSINE_DEGRADATION	0.584635	0.853897	0.30782	0.915077	3629	39	PLOD2 BBOX1 PLOD1 ALDH2 PLOD3 AASS ALDH7A1 ALDH9A1 ALDH3A2 EHMT1 SETD7 AASDH HADH HADHA SETDB2	c2.cp
PID_AR_TF_PATHWAY	0.58988	0.860345	0.295368	0.921351	3776	50	FOXO1 GATA2 HDAC1 NR0B1 SIRT1 KAT2B RXRG RXRA TMPRSS2 REL PKN1 JUN HDAC7 NR2C1 PDE9A SMARCC1 DNAJA1 HSP90AA1 KLK2 SMARCE1	c2.cp
REACTOME_MITOTIC_M_M_G1_PHASES	0.591664	0.861736	0.253807	0.939308	4414	160	CDK2 GMNN CENPA AURKB CDC45 PSMB8 PPP1CC RPS27 ORC1 FBXO5 STAG2 STAG1 MAPRE1 PSMB9 PPP2R1B RPA4 POLA1 RPS27A PSME1 MCM5 XPO1 BIRC5 CDC6 AHCTF1 MCM7 NUP37 MCM8 PSMB1 NSL1 DBF4 RCC2 PMF1 KIF18A PRIM2 CENPQ B9D2 SMC3 BUB3 MCM3 NUDC PSME2 RAD21 MCM10 KIF2C PPP2CB UBA52 PPP2R5A PSMA2 RANBP2 KIF20A PLK1 CENPM PSMD6 POLE2 CENPK	c2.cp
KEGG_RIBOFLAVIN_METABOLISM	0.599569	0.870802	0.363127	0.893773	3335	16	TYR ACP5 ENPP1 ACPP ACP6 PHPT1	c2.cp
REACTOME_M_G1_TRANSITION	0.599195	0.870802	0.276773	0.926303	4016	78	CDK2 GMNN CDC45 PSMB8 ORC1 PSMB9 RPA4 POLA1 RPS27A PSME1 MCM5 CDC6 MCM7 MCM8 PSMB1 DBF4 PRIM2 MCM3 PSME2 MCM10 UBA52 PSMA2 PSMD6 POLE2	c2.cp
SIG_CD40PATHWAYMAP	0.605185	0.875282	0.310603	0.89901	3687	34	NFKBIA NFKB2 DUSP1 CD40	c2.cp
REACTOME_METABOLISM_OF_AMINO_ACIDS_AND_DERIVATIVES	0.603709	0.875282	0.249879	0.938222	4589	185	SLC5A5 DIO3 CKM MAT1A SQRDL HAL HPD SMOX ARG1 NAGS BBOX1 GLUL INHBE INHBB SAT1 PSAT1 ADI1 PSMB8 DIO1 PRODH PHGDH BCAT2 PCBD1 GATM PSMB9 TAT HIBCH PSPH NQO1 AASS GPT2 AANAT HAAO ALDH6A1 PSME1 PNMT OTC ALDH7A1 ALDH9A1 LHB SHMT1 TST ASS1 MAT2A	c2.cp
REACTOME_ACTIVATION_OF_BH3_ONLY_PROTEINS	0.60496	0.875282	0.362031	0.891077	3365	16	BMF PMAIP1 BCL2L11 BCL2 TP53 BID BAD DYNLL1	c2.cp
REACTOME_SYNTHESIS_OF_PC	0.61013	0.881205	0.35629	0.889464	3420	17	LPIN3 SLC44A3 CHPT1 SLC44A4 LPIN1 SLC44A1	c2.cp
KEGG_PROPANOATE_METABOLISM	0.615729	0.886142	0.313396	0.895854	3710	32	ACSS3 SUCLG2 ALDH2 HIBCH ACACB ALDH6A1 ALDH7A1 ALDH9A1 ALDH3A2 ACSS1 MUT PCCA SUCLG1 HADHA ACADM	c2.cp
BIOCARTA_PYK2_PATHWAY	0.615858	0.886142	-0.295847	-0.898997	2500	28	PAK1 CALM3 PRKCB CALM1 MAP2K1 MAP2K4 MAPK1 MAPK8 CALM2 PTK2B	c2.cp
REACTOME_ACTIVATED_NOTCH1_TRANSMITS_SIGNAL_TO_THE_NUCLEUS	0.617821	0.886142	0.325419	0.887787	3646	25	DLL4 JAG1 DLL1 DTX2 RPS27A	c2.cp
REACTOME_PI3K_AKT_ACTIVATION	0.616273	0.886142	0.305061	0.892873	3786	36	CDKN1A FOXO1 NGF FOXO4 CDKN1B RHOA RICTOR CHUK PIK3CA IRS2 BAD PHLPP1 IRS1 AKT1S1 CREB1	c2.cp
REACTOME_PIP3_ACTIVATES_AKT_SIGNALING	0.61729	0.886142	0.322012	0.891731	3662	27	CDKN1A FOXO1 FOXO4 CDKN1B RICTOR CHUK BAD PHLPP1 AKT1S1 CREB1	c2.cp
REACTOME_INCRETIN_SYNTHESIS_SECRETION_AND_INACTIVATION	0.619518	0.887349	0.356734	0.87804	3446	16	GATA4 CDX2 PAX6 SEC11A	c2.cp
KEGG_SNARE_INTERACTIONS_IN_VESICULAR_TRANSPORT	0.624718	0.887442	0.300047	0.888357	3881	38	VAMP8 STX11 VAMP5 SNAP23 STX19 VAMP3 STX10 STX2	c2.cp
KEGG_VASCULAR_SMOOTH_MUSCLE_CONTRACTION	0.621333	0.887442	-0.233108	-0.934136	1863	110	ADRA1D ACTG2 MYLK2 CYP4A11 CACNA1S ADRA1B CALML3 PPP1R14A JMJD7-PLA2G4B ACTA2 PRKCQ ADCY1 PLA2G2D PLA2G3 ADCY7 PRKCG CALM3 PLCB1 MYH11 PPP1R12B PLA2G5 ARHGEF11 PRKCB PRKCE CACNA1D	c2.cp
KEGG_DORSO_VENTRAL_AXIS_FORMATION	0.623553	0.887442	0.327042	0.884613	3663	24	EGFR NOTCH2 NOTCH4 NOTCH3 ETV6 ETS1 PIWIL4 NOTCH1	c2.cp
REACTOME_PROCESSING_OF_CAPPED_INTRON_CONTAINING_PRE_MRNA	0.624193	0.887442	0.255456	0.924236	4545	132	PTBP1 YBX1 HNRNPF U2AF1 PAPOLA HNRNPH1 POLR2J SNRPG SNRPA POLR2H PCF11 HNRNPA2B1 NUP37 CCAR1 HNRNPC LSM2 SRSF1 POLR2L NXF1 CPSF2 DDX23 GTF2F2 CSTF3 PCBP2 NUP205 PHF5A MAGOH SNRPE SF3B2 NCBP2 SRSF7 SRSF3 RANBP2 SF3B1 PCBP1 PABPN1 HNRNPD SRSF4 SNRPB2 SRSF9 SNRPF HNRNPM SRSF11 RAE1 NUP188 HNRNPR UPF3B SNRPD3 SNRPD2 HNRNPU NUP35 U2AF2 CSTF1 SLBP HNRNPUL1 SMC1A SRSF5 POLR2I	c2.cp
REACTOME_PLC_BETA_MEDIATED_EVENTS	0.624044	0.887442	-0.274979	-0.904251	2366	39	CAMK4 ADCY1 ADCY7 PRKCG CALM3 PLCB1 PDE1A CALM1 PLCB4 PRKACA MAPK1 ADCY6 PRKCD PDE1B PRKAR1A ADCY5 CALM2 PRKACB GNAI1 GNAO1	c2.cp
REACTOME_ACTIVATION_OF_ATR_IN_RESPONSE_TO_REPLICATION_STRESS	0.621746	0.887442	0.306467	0.8913	3796	35	CDK2 CDC45 ORC1 CDC25A MCM5 CDC6 MCM7 RFC4 CHEK1 MCM8 DBF4 MCM3 MCM10	c2.cp
REACTOME_BMAL1_CLOCK_NPAS2_ACTIVATES_CIRCADIAN_EXPRESSION	0.629472	0.892971	0.305888	0.885362	3835	34	SERPINE1 PPARA NAMPT CRY1 PER1 RXRA TBL1X BHLHE41 NR1D1 RORA NCOA3 SMARCD3 ARNTL TGS1 BHLHE40	c2.cp
REACTOME_P75_NTR_RECEPTOR_MEDIATED_SIGNALLING	0.639171	0.905492	0.270443	0.905117	4284	78	NFKBIA NGFR RELA FGD2 MYD88 BCL2L11 HDAC1 PLEKHG2 NGF ARHGEF6 SMPD2 VAV1 FGD4 RIPK2 RPS27A VAV3 FGD3 IKBKB ARHGAP4 NET1 TIAM2 RHOA ARHGEF16 CASP2 SOS2 AATF	c2.cp
REACTOME_LIPOPROTEIN_METABOLISM	0.641927	0.908156	0.318208	0.875504	3796	26	ABCA1 PLTP LPL CUBN HSPG2 LCAT APOA1 BMP1 APOB LIPC A2M APOE MTTP APOC2 LDLR ABCG1	c2.cp
REACTOME_CGMP_EFFECTS	0.642857	0.908233	0.337204	0.86525	3671	19	PRKG1 PDE3A MRVI1 PDE6G PDE5A KCNMB3 PDE6A	c2.cp
PID_ENDOTHELIN_PATHWAY	0.645923	0.910599	0.276811	0.893096	4213	61	COL1A2 EDN1 COL3A1 FOS PRKCH PLCB3 GNA14 EDNRB GNA12 CYSLTR2 GNAI3 JAK2 JUN EDNRA ADCY4 RHOA	c2.cp
REACTOME_SEMAPHORIN_INTERACTIONS	0.647166	0.910599	0.27459	0.893968	4247	65	PTPRC TYROBP RAC2 ITGA1 TREM2 FES RHOC ERBB2 RRAS ITGB1 ROCK1	c2.cp
REACTOME_E2F_MEDIATED_REGULATION_OF_DNA_REPLICATION	0.647039	0.910599	0.303572	0.873954	3922	33	CDC45 ORC1 FBXO5 PPP2R1B CDC25A PCNA POLA1 PPP2R3B CDC6 RB1 MCM8 DHFR CDK1 PRIM2 PPP2CB RRM2	c2.cp
REACTOME_ACTIVATION_OF_NF_KAPPAB_IN_B_CELLS	0.648988	0.910691	0.276393	0.891748	4233	61	NFKBIA RELA PSMB8 PSMB9 MALT1 RPS27A REL PSME1 IKBKB PSMB1 BCL10 CHUK MAP3K7 NFKBIB PSME2 UBA52 PSMA2	c2.cp
REACTOME_RECYCLING_PATHWAY_OF_L1	0.648887	0.910691	-0.295199	-0.880466	2651	26	L1CAM DNM1 KIF4B CLTC SH3GL2 AP2A1 RPS6KA4 AP2M1 MAPK1 AP2B1	c2.cp
REACTOME_G1_S_SPECIFIC_TRANSCRIPTION	0.655252	0.918239	0.342439	0.854886	3673	17	CDC45 ORC1 FBXO5 CDC25A PCNA POLA1 CDC6 DHFR CDK1	c2.cp
REACTOME_REGULATION_OF_WATER_BALANCE_BY_RENAL_AQUAPORINS	0.6608	0.924763	0.291443	0.871499	4129	40	AQP1 AQP4 GNG11 GNG12 GNG5 AQP3 GNG8	c2.cp
KEGG_MELANOGENESIS	0.662757	0.926252	0.258459	0.897125	4576	98	WNT6 FZD2 PRKX EDN1 ASIP FZD9 WNT16 TYR TCF7L1 LEF1 FZD1 WNT3 PLCB3 EDNRB CREB3L2 FZD8 FZD4 FZD5 WNT9B GNAI3 TCF7 FZD10 FZD7 WNT5B ADCY4	c2.cp
KEGG_NON_SMALL_CELL_LUNG_CANCER	0.664971	0.928095	0.277125	0.877195	4312	54	EGFR PIK3R5 CDKN2A ERBB2 PLCG2 PIK3CG RXRG RXRA RASSF1 CCND1 CDK4 TP53 ARAF RB1	c2.cp
BIOCARTA_MEF2D_PATHWAY	0.666845	0.92946	0.33898	0.846252	3738	17	NFATC2 CAPN2 NFATC1 HDAC1	c2.cp
REACTOME_APC_C_CDC20_MEDIATED_DEGRADATION_OF_CYCLIN_B	0.671043	0.934056	0.329811	0.846282	3832	19	UBE2C CDC26 RPS27A ANAPC11 CDK1 CDC16 UBA52	c2.cp
KEGG_PHENYLALANINE_METABOLISM	0.678081	0.942109	0.335798	0.838308	3801	17	HPD IL4I1 TAT MAOA AOC2 PRDX6 MAOB MIF	c2.cp
REACTOME_BILE_ACID_AND_BILE_SALT_METABOLISM	0.679204	0.942109	0.313328	0.847519	3990	24	CYP39A1 CH25H ACOX2 SLCO1B1 HSD3B7 CYP27A1 SLC10A1 HSD17B4 SLC27A2	c2.cp
REACTOME_G_ALPHA1213_SIGNALLING_EVENTS	0.680317	0.942109	0.264854	0.879032	4551	73	RAC2 GNG11 GNG12 GNG5 GNA13 FGD2 RHOC ROCK1 PLEKHG2 ARHGEF6 GNG8 VAV1 FGD4 GNA12 VAV3 GNG10 FGD3 ARHGAP4 PLXNB1 NET1 TIAM2 RHOA GNGT2 TBXA2R ARHGEF16 SOS2 PIK3CA	c2.cp
REACTOME_CIRCADIAN_CLOCK	0.680462	0.942109	0.279692	0.872451	4356	50	SERPINE1 PPARA NAMPT CRY1 PER1 RXRA TBL1X RPS27A BHLHE41 NR1D1 CPT1A RORA HIF1A FBXL3 NCOA3 SMARCD3 UBA52 ARNTL TGS1 BHLHE40 CREB1	c2.cp
PID_NETRIN_PATHWAY	0.681761	0.942648	-0.275534	-0.867582	2709	32	PAK1 MAP1B AGAP2 PITPNA MAP2K1 DCC PIK3R1 MAPK1 CAMK2A ELMO1 UNC5A PTK2 CDC42 UNC5B	c2.cp
REACTOME_SULFUR_AMINO_ACID_METABOLISM	0.687202	0.947089	0.31146	0.842465	4037	24	MAT1A SQRDL ADI1 TST MAT2A MTAP CBS ETHE1 APIP	c2.cp
REACTOME_INHIBITION_OF_VOLTAGE_GATED_CA2_CHANNELS_VIA_GBETA_GAMMA_SUBUNITS	0.687713	0.947089	0.311139	0.841595	4040	24	GNG12 GNG5 KCNJ15 KCNJ10 KCNJ2 GNG8 GNG10 KCNJ16 GNGT2	c2.cp
REACTOME_REGULATION_OF_GLUCOKINASE_BY_GLUCOKINASE_REGULATORY_PROTEIN	0.686078	0.947089	-0.288062	-0.859179	2803	26	NUP93 NUP210 GCKR POM121 NUP155 SEH1L	c2.cp
REACTOME_PI3K_CASCADE	0.692835	0.952878	0.267291	0.867374	4544	63	FGF23 FGF2 EIF4EBP1 DOK1 FGF17 FGFR4 RPS6 GAB1 TLR9 CAB39L FGF18 FGF10 PIK3CA IRS2 STRADB INSR FGFR3 FRS2 IRS1	c2.cp
PID_AR_NONGENOMIC_PATHWAY	0.697373	0.957848	0.293966	0.836372	4193	31	GNRH1 FOS PLCG2 PLCB3 GNAI3 PIK3CA PLCB2 GNAI2 RAF1 CREB1 SHBG	c2.cp
REACTOME_SIGNALING_BY_NODAL	0.698904	0.958682	0.324683	0.821851	3952	18	FOXH1 SMAD4 LEFTY2	c2.cp
PID_NCADHERIN_PATHWAY	0.70068	0.959036	0.293611	0.839295	4222	32	GJA1 GSN ROCK1 JUP KIF5B MAPRE1 LRP5 RHOA CTNNA1 FER PIK3CA CDH2	c2.cp
REACTOME_NEGATIVE_REGULATION_OF_FGFR_SIGNALING	0.701012	0.959036	0.293461	0.838868	4224	32	FGF23 FGF2 FGF17 FGFR4 RPS27A FGF18 FGF10 FGFR3 PPP2CB FRS2 UBA52 FGFR1	c2.cp
PID_ERBB1_RECEPTOR_PROXIMAL_PATHWAY	0.702636	0.959992	0.288922	0.840272	4290	35	EGFR PTPN6 GSN GAB1 STAT3 TLN1 GNAI3 SHC1 NCK1 PIK3CA	c2.cp
KEGG_GLYCINE_SERINE_AND_THREONINE_METABOLISM	0.706303	0.963732	0.294231	0.833409	4246	30	CHDH ALAS2 PSAT1 PHGDH GATM MAOA PSPH AOC2 SHMT2 SHMT1 SDS MAOB	c2.cp
PID_PI3K_PLC_TRK_PATHWAY	0.707285	0.963804	-0.264195	-0.854099	2727	36	CAMK4 EGR1 AGAP2 NTRK1 YWHAG TRPC3 GSK3B YWHAB YWHAZ PIK3R1 YWHAH EPB41L1 CAMK2A PDPK1 PRKCD	c2.cp
KEGG_ERBB_SIGNALING_PATHWAY	0.708469	0.964149	0.255957	0.869775	4801	86	AREG CDKN1A MYC EIF4EBP1 EGFR PIK3R5 STAT5A ERBB2 PLCG2 PIK3CG GAB1 ELK1	c2.cp
KEGG_PROXIMAL_TUBULE_BICARBONATE_RECLAMATION	0.712207	0.967967	0.306706	0.820576	4159	23	PCK1 AQP1 FXYD2 ATP1A2 SLC4A4 CA2 ATP1B3 ATP1B4	c2.cp
REACTOME_SIGNALLING_TO_P38_VIA_RIT_AND_RIN	0.714222	0.969434	-0.314677	-0.821196	3188	15	RIT2 NTRK1 MAP2K1 YWHAB MAPK1 KRAS BRAF	c2.cp
PID_RAS_PATHWAY	0.72349	0.97945	-0.271671	-0.840298	2885	30	RASGRP1 RASGRF1 RASAL1 SYNGAP1 PRKCB PRKCE CAMK2B RASGRF2 NF1 RASGRP3 RABGEF1 PRKCZ KRAS	c2.cp
REACTOME_AQUAPORIN_MEDIATED_TRANSPORT	0.722757	0.97945	0.272495	0.837478	4582	46	AQP1 AQP4 GNG11 GNG12 GNG5 AQP3 AQP6 GNG8 AQP9 GNG10 ADCY4 AQP5 GNGT2	c2.cp
REACTOME_ADHERENS_JUNCTIONS_INTERACTIONS	0.726508	0.982254	-0.285847	-0.828536	3022	23	CDH15 CDH12 CDH8 CDH18 CDH7 CDH24 CDH13 CDH9 CDH10	c2.cp
REACTOME_MRNA_SPLICING_MINOR_PATHWAY	0.7288	0.98279	0.277521	0.82987	4554	40	POLR2J SNRPG POLR2H LSM2 SRSF1 POLR2L DDX23 GTF2F2 SNRPE SF3B2 NCBP2 SRSF7 SF3B1 SNRPF SNRPD3 SNRPD2	c2.cp
REACTOME_MAP_KINASE_ACTIVATION_IN_TLR_CASCADE	0.728157	0.98279	0.269983	0.838191	4641	49	NOD2 FOS MAPKAPK2 ATF1 TAB2 ELK1 PPP2R1B RIPK2 MAP2K3 JUN NOD1 MAPKAPK3 RPS6KA1 MAP3K7 CDK1 IRAK2 PPP2CB MAPK7 RPS6KA5 CREB1	c2.cp
BIOCARTA_PROTEASOME_PATHWAY	0.731863	0.985639	0.295136	0.822782	4347	28	RPN2 PSMB1 PSMA2 PSMD6 RPN1 PSMB3 PSMA7 PSMA1 UBE2A PSMA4 PSMB4 PSMA6 PSMB6 PSMB7 PSMA3 PSMD12 PSMC2 PSMC6 PSMD11 UBA1 PSMC3 PSMD8 PSMC4 PSMD14 UBE3A PSMB5 PSMA5 PSMB2	c2.cp
REACTOME_GLYCOGEN_BREAKDOWN_GLYCOGENOLYSIS	0.734543	0.987821	0.323658	0.796628	4086	16	PYGL PGM2 PHKA1 PHKG1 PYGM PGM1	c2.cp
REACTOME_NITRIC_OXIDE_STIMULATES_GUANYLATE_CYCLASE	0.735389	0.987821	0.296445	0.808742	4340	25	NOS3 PRKG1 PDE3A MRVI1 PDE6G PDE5A KCNMB3 PDE6A	c2.cp
KEGG_LYSOSOME	0.739398	0.991375	0.242022	0.863006	5282	118	SLC11A1 CTSS CD68 LAPTM5 TCIRG1 CTSK NPC2 DNASE2B ACP5 LAPTM4A HYAL1 CTSC NAPSA CD63 CTSH LAMP2 LAMP3 CD164 DNASE2 MAN2B1 CTSW CTSZ MANBA TPP1 CTNS IGF2R AP3B1 AP4E1 CLN5	c2.cp
PID_LKB1_PATHWAY	0.739946	0.991375	0.269627	0.828663	4691	46	SFN SIK1 EZR MYC	c2.cp
PID_RET_PATHWAY	0.743115	0.994336	0.27638	0.821613	4613	39	DOK1 PXN RAP1A GAB1 PDLIM7 JUN SHC1 RHOA NCK1 PIK3CA IRS2 SOS1 FRS2 IRS1 CREB1	c2.cp
REACTOME_INWARDLY_RECTIFYING_K_CHANNELS	0.744221	0.994532	0.285902	0.809816	4474	30	GNG12 GNG5 KCNJ15 KCNJ10 KCNJ2 GNG8 KCNJ8 GNG10 KCNJ16 ABCC9 GNGT2	c2.cp
REACTOME_KINESINS	0.745734	0.995272	-0.280568	-0.813235	3102	23	KIF4B KIFAP3 KIF3C KIF3B KLC2 KIF2A KLC1	c2.cp
BIOCARTA_WNT_PATHWAY	0.750803	0.9996	0.291099	0.800918	4440	26	MYC LEF1 FZD1 HDAC1 SMAD4 TLE1 CCND1	c2.cp
REACTOME_METABOLISM_OF_NUCLEOTIDES	0.750905	0.9996	0.254652	0.836277	4976	68	GMPR CDA PNP CAT NT5C1B DPYD ADA TYMP TK1 UPP2 GPX1 DTYMK NT5E PPAT UPB1 AK1 NT5C2 UCK1 ATIC NME4 GLRX NME2 DUT RRM2 IMPDH1	c2.cp
KEGG_CITRATE_CYCLE_TCA_CYCLE	0.98576	1	0.185868	0.522911	5883	29	PCK1 SUCLG2 IDH1 SDHD	c2.cp
KEGG_STEROID_BIOSYNTHESIS	0.989635	1	-0.184938	-0.49155	4391	16	TM7SF2 DHCR24	c2.cp
KEGG_OXIDATIVE_PHOSPHORYLATION	1	1	0.115232	0.408104	7066	113	COX8C TCIRG1 NDUFA4L2 ATP6V0E1	c2.cp
KEGG_PURINE_METABOLISM	0.99946	1	0.164385	0.604511	7400	151	GMPR ALLC PNP PAPSS2 GUCY2D ENPP1 ADCY10 NPR1 NT5C1B ENTPD2 PDE3A ADA PNPT1 AK4 POLD1 POLR2J PDE6G PDE5A POLA1 POLR2H NME3 PDE6A NT5E ADCY4 PPAT GUCY2C ZNRD1 ENTPD1 PDE4D POLE4 AK1 POLR3GL POLR2L NUDT9 NT5C2 PRIM2 NUDT5 NME7 ATIC NME4 PDE9A PDE6C NME2	c2.cp
KEGG_PYRIMIDINE_METABOLISM	0.977455	1	0.191996	0.664528	6719	96	CDA PNP NT5C1B DPYD AK3 PNPT1 POLD1 TYMP POLR2J TK1 UPP2 POLA1 POLR2H NME3 DTYMK NT5E UPB1 ZNRD1 ENTPD1 POLE4 POLR3GL POLR2L NT5C2 PRIM2 UCK1 NME7 NME4 NME2 DUT RRM2 POLD4 POLD2	c2.cp
KEGG_ALANINE_ASPARTATE_AND_GLUTAMATE_METABOLISM	0.924774	1	-0.223341	-0.696527	3687	31	ACY3 GAD2 GOT1 ASL ADSS CPS1 GLUD2 GAD1 GLS2 GLS CAD GOT2	c2.cp
KEGG_ARGININE_AND_PROLINE_METABOLISM	0.834033	1	0.245365	0.770529	5361	52	CKM P4HA1 NOS3 ARG1 NAGS GLUL SAT1 P4HA2 PRODH ALDH2 GATM MAOA SAT2 OTC ALDH7A1 ALDH9A1 ALDH3A2 MAOB ASS1	c2.cp
KEGG_BETA_ALANINE_METABOLISM	0.843847	1	0.271546	0.719702	4895	22	DPYD ALDH2 HIBCH AOC2 ALDH7A1 ALDH9A1 ALDH3A2 UPB1	c2.cp
KEGG_GLUTATHIONE_METABOLISM	0.914177	1	-0.215977	-0.727087	3365	44	GSTA1 GPX2 GSTT2 GSTZ1 GGT7 GSS	c2.cp
KEGG_N_GLYCAN_BIOSYNTHESIS	0.995584	1	0.17183	0.528098	6312	46	B4GALT1 DAD1 DPM3 ALG10B MGAT1 RPN2 MAN1A1 STT3A ST6GAL1 DPM1 ALG2 MAN2A1 RPN1 MAN1C1 MGAT4A ALG8 DPAGT1 ALG6	c2.cp
KEGG_OTHER_GLYCAN_DEGRADATION	0.966181	1	-0.214219	-0.559037	4313	15	NEU3 GBA NEU4 MAN2B2 AGA MAN2C1 HEXA NEU1 FUCA1 FUCA2 GLB1 HEXB ENGASE MANBA MAN2B1	c2.cp
KEGG_GLYCEROLIPID_METABOLISM	0.884372	1	-0.228719	-0.746267	3349	38	PNPLA3 ALDH1B1 DGAT2 DGKI DGKQ DGKZ GLYCTK DGKD AGPAT4 LCLAT1 DGKB DGKH AGPAT1 AGPAT3 AGK DGKE	c2.cp
KEGG_INOSITOL_PHOSPHATE_METABOLISM	0.842618	1	0.242436	0.765009	5444	53	ISYNA1 ITPKB IMPA2 PLCD1 PLCG2 PLCB3 PIK3CG INPPL1 ALDH6A1 PLCE1 PLCD4 INPP4B ITPKA IPMK PIK3CA PLCB2	c2.cp
KEGG_GLYCEROPHOSPHOLIPID_METABOLISM	0.901978	1	-0.211211	-0.77235	3054	67	GPD1 JMJD7-PLA2G4B PLA2G2D PLA2G3 PHOSPHO1 PLA2G5 LPCAT4 DGKI DGKQ DGKZ DGKD AGPAT4 LCLAT1 CDS1 PLA2G1B DGKB CDS2 PCYT1B DGKH PLA2G6 PCYT2 AGPAT1 LPGAT1 AGPAT3 CDIPT	c2.cp
KEGG_SPHINGOLIPID_METABOLISM	0.997953	1	-0.157609	-0.502709	3899	34	NEU3 GBA SMPD3 ASAH2 SGPP2 GAL3ST1 B4GALT6 NEU4 SPHK2 ARSA DEGS2	c2.cp
KEGG_GLYCOSPHINGOLIPID_BIOSYNTHESIS_GANGLIO_SERIES	0.956103	1	-0.22239	-0.580361	4268	15	ST8SIA5 ST6GALNAC5 B4GALNT1	c2.cp
KEGG_PYRUVATE_METABOLISM	0.994456	1	-0.173865	-0.567289	3766	38	PKLR ALDH1B1 ACAT2 MDH1 ACOT12 ACACA ME3	c2.cp
KEGG_GLYOXYLATE_AND_DICARBOXYLATE_METABOLISM	0.936066	1	0.246812	0.598241	5182	15	MTHFD2 MTHFD2L HYI	c2.cp
KEGG_BUTANOATE_METABOLISM	0.763896	1	0.278745	0.796802	4603	32	AKR1B10 ACSM1 BDH2 ACSM3 ALDH2 ACSM5 ACSM2A ALDH7A1 ALDH9A1 ALDH3A2	c2.cp
KEGG_NITROGEN_METABOLISM	0.93032	1	0.237231	0.6347	5433	23	HAL GLUL CA3 CA9 CA2 CA8	c2.cp
KEGG_BIOSYNTHESIS_OF_UNSATURATED_FATTY_ACIDS	0.875848	1	-0.251499	-0.705387	3745	20	SCD ACOT4 ACOT7 ACOT1 ELOVL6	c2.cp
KEGG_ABC_TRANSPORTERS	0.865834	1	-0.226847	-0.763682	3187	44	ABCB11 CFTR ABCC12 ABCG4 ABCC11 ABCC8 ABCD2 ABCG8 ABCG5 ABCB8 ABCC3 ABCC1	c2.cp
KEGG_RNA_POLYMERASE	0.910241	1	-0.228893	-0.702087	3670	29	POLR1A POLR3A POLR2A POLR3C POLR2J3 POLR3B POLR3K POLR2E POLR2J2 POLR3F POLR3D POLR3G POLR2B POLR1B POLR2C	c2.cp
KEGG_BASAL_TRANSCRIPTION_FACTORS	0.992298	1	-0.178559	-0.573707	3864	35	TBPL2	c2.cp
KEGG_PROTEASOME	0.876137	1	0.242698	0.730103	5488	41	PSMB8 PSMB9 PSME1 PSMB1 PSME2 POMP PSMA2 PSMD6 PSMB3 PSMC5 PSMB10 PSMA7 PSMA1 PSMA4 PSMB4 PSMD4 PSMF1 PSMA6 PSMB6 PSMB7 PSMA3 PSMD12 PSMD7 PSMC2 PSMC6 PSMD13 PSMD11 PSME4 PSMC3 PSMC1 PSMD8 PSMC4 PSMD14 PSMD3 PSMB5 PSMA5 PSMB2 PSMD2 PSMD1 PSMA8 PSME3	c2.cp
KEGG_PROTEIN_EXPORT	0.941572	1	0.231323	0.613095	5462	22	SEC11A SPCS2 SRP14 SRP9 SEC61B SEC61A1 HSPA5 SEC61G SEC11C SEC62 IMMP1L	c2.cp
KEGG_BASE_EXCISION_REPAIR	0.869216	1	0.250551	0.725195	5296	34	UNG PARP4 POLD1 PCNA POLE4 MUTYH POLD4 POLD2 APEX2 POLE2	c2.cp
KEGG_NUCLEOTIDE_EXCISION_REPAIR	0.99288	1	0.178436	0.5437	6274	44	POLD1 PCNA RPA4 ERCC5 DDB2 RFC4 POLE4 POLD4 POLD2 POLE2 CDK7 MNAT1 RFC1 CETN2 POLD3 CUL4A ERCC4	c2.cp
KEGG_MISMATCH_REPAIR	0.995891	1	0.167613	0.44844	5816	23	POLD1 PCNA RPA4 RFC4 MSH6 POLD4 POLD2 RFC1 EXO1	c2.cp
KEGG_PHOSPHATIDYLINOSITOL_SIGNALING_SYSTEM	0.989823	1	0.185187	0.615658	6613	74	ITPKB PIK3R5 INPP5D IMPA2 ITPR2 PLCD1 PLCG2 PLCB3 ITPR3 PIK3CG INPPL1	c2.cp
KEGG_OOCYTE_MEIOSIS	0.999281	1	0.160709	0.563059	6951	105	CDK2 PRKX PGR PTTG2 SPDYA ITPR2 SPDYC ITPR3 PPP1CC FBXO5 PPP2R1B CDC26 MAD2L2	c2.cp
KEGG_UBIQUITIN_MEDIATED_PROTEOLYSIS	1	1	0.128294	0.463275	7254	131	SOCS3 UBE2C BIRC3 MID1 MAP3K1 FBXO2 SOCS1 CDC26 PML RNF7 DDB2 SIAH1 SMURF2 FANCL UBR5 ANAPC11 HERC4 UBE2L6 UBE2B CDC16 PIAS4 BIRC2 UBE2J1 UBE2D3 SKP2 UBE2Q2 BRCA1 KEAP1 PIAS1 UBE2L3 UBE2Q1 UBA7 UBE2G2 NEDD4 UBE2J2 CBL UBE2R2 UBA2 CDC34	c2.cp
KEGG_REGULATION_OF_AUTOPHAGY	0.820769	1	0.274035	0.747606	4844	25	IFNA2 ATG4A ATG4C	c2.cp
KEGG_PEROXISOME	1	1	-0.138183	-0.520068	3304	77	DAO	c2.cp
KEGG_CARDIAC_MUSCLE_CONTRACTION	0.919461	1	-0.207861	-0.769011	3070	71	ATP1A3 CACNA1S CACNG2 CACNB1 CACNG5 RYR2 ATP1A1 ATP2A2 CACNA1D SLC9A1 CACNG3 CACNA2D2 ATP1B1 CACNG8 CACNB3 ACTC1 ATP1A4 CACNB4 CACNA1C COX6A2 SLC9A6	c2.cp
KEGG_AXON_GUIDANCE	0.930982	1	0.209319	0.7525	6703	127	CXCR4 EPHA2 RHOD EFNA4 SEMA3F RAC2 NFATC4 NFATC2 EPHB4 FES SEMA3D EFNA1 NFATC1 ITGB1 ROCK1 EFNB1 SEMA3C	c2.cp
KEGG_GAP_JUNCTION	0.906572	1	0.219673	0.747828	6151	87	TUBAL3 PDGFD PRKX GJA1 TUBB6 EGFR TUBA1C PDGFRB ITPR2 PLCB3 ITPR3	c2.cp
KEGG_NEUROTROPHIN_SIGNALING_PATHWAY	0.845145	1	0.226047	0.809058	6057	123	NFKBIA IRAK3 NGFR FASLG PIK3R5 RELA ARHGDIB MAPKAPK2 PLCG2 BCL2 RAP1A NGF PIK3CG GAB1 RAP1B MAP3K1 IRAK4 RIPK2 ATF4 NFKB1 IKBKB JUN TP53 SH2B2 SHC1 RHOA ZNF274 MAP3K5 RPS6KA1 SOS2 PIK3CA IRAK2 NFKBIB IRS2 SHC4 SOS1 BAD RAF1 FRS2 MAP3K3 MAPK7 IRS1 RPS6KA5 NTRK2	c2.cp
KEGG_LONG_TERM_DEPRESSION	0.792442	1	-0.230797	-0.843973	2683	67	GRM5 PPP1R17 JMJD7-PLA2G4B PLA2G2D PLA2G3 CACNA1A CRHR1 NOS1 PRKCG PLCB1 CRH PLA2G5 PRKCB GRID2 ITPR1 MAP2K1 GRM1 IGF1 GRIA3 PLA2G1B PLCB4 PPP2R1A MAPK1	c2.cp
KEGG_GNRH_SIGNALING_PATHWAY	0.976208	1	0.193234	0.66865	6728	95	PLA2G2A PRKX MMP14 GNRH1 EGFR ITPR2 PLCB3 ITPR3 MMP2 ELK1 MAP3K1 ATF4 MAP2K3 PLA2G4E JUN LHB ADCY4	c2.cp
KEGG_PROGESTERONE_MEDIATED_OOCYTE_MATURATION	0.880663	1	0.227341	0.767115	5947	82	CDK2 PRKX PGR CCNA2 PIK3R5 SPDYA SPDYC PIK3CG PDE3A CDC26 MAD2L2 CDC25A GNAI3 ADCY4 ARAF ANAPC11 IGF1R RPS6KA1 PIK3CA CDK1 GNAI2 CDC16	c2.cp
KEGG_ALZHEIMERS_DISEASE	0.980787	1	0.191533	0.706157	7299	154	COX8C TNFRSF1A TNF IL1B CASP7 NDUFA4L2 BACE2 CAPN2 LPL FAS ITPR2 PLCB3 ITPR3 COX6B2	c2.cp
KEGG_PARKINSONS_DISEASE	0.999294	1	0.162544	0.57547	7079	112	SLC6A3 COX8C NDUFA4L2 SLC25A31 COX6B2 COX4I2 UQCRHL SNCAIP SDHD ATP5E SLC18A1 COX5B NDUFB4 PPID UBE2L6 NDUFB1 UBE2J1 UQCR11 NDUFS8 UQCRB NDUFS6 PARK7 NDUFV2 COX7C APAF1 UBE2L3 NDUFB10 UBA7 NDUFC1 COX6C UBE2G2 UBE2J2	c2.cp
KEGG_AMYOTROPHIC_LATERAL_SCLEROSIS_ALS	0.894074	1	0.230415	0.72358	5747	52	CASP1 TNFRSF1A TNFRSF1B TNF CAT BCL2	c2.cp
KEGG_HUNTINGTONS_DISEASE	1	1	-0.108593	-0.461918	2489	170	TBPL2 GRM5 DNAH3 DNAH1 GRIN2B CREB3L1 GRIN1 PLCB1 DCTN1 DNAH2 BDNF CLTC ITPR1 HTT POLR2A ATP5B AP2A1 AP2M1 POLR2J3 VDAC1 COX6A2 PLCB4 DLG4 DCTN2 NDUFS1 DNAL4 CREB3L3 TAF4B ATP5G1 NDUFA9 AP2B1 DNAL1 ATP5A1 COX5A SLC25A5 NDUFV1 NDUFA5 CYC1 ATP5F1 UQCRC1 SDHC ATP5G3 UQCRC2 POLR2E POLR2J2 NDUFA10 NDUFA4	c2.cp
KEGG_VIBRIO_CHOLERAE_INFECTION	0.81946	1	0.250789	0.782293	5246	50	PRKX TCIRG1 ATP6V0E1 TJP2 KDELR3 KCNQ1 PLCG2	c2.cp
KEGG_GLIOMA	0.934673	1	0.215678	0.701354	6137	64	CDKN1A EGFR PIK3R5 PDGFRB CDKN2A PLCG2 PIK3CG PDGFRA CCND1 CDK4 TP53 ARAF RB1 SHC1 IGF1R SOS2 PIK3CA SHC4	c2.cp
BIOCARTA_ARAP_PATHWAY	0.947566	1	0.230162	0.574592	5312	17	KDELR3 CYTH4 ARFGAP3	c2.cp
BIOCARTA_AT1R_PATHWAY	0.847519	1	0.258439	0.738758	5107	32	AGTR1 EGFR ELK1 MAP3K1 AGT JUN SHC1	c2.cp
BIOCARTA_CARM_ER_PATHWAY	0.990503	1	0.18614	0.541352	6048	35	HDAC1 NR0B1 CCND1 HDAC8 HDAC7 BRCA1 HDAC4 CREBBP SPEN HDAC2 EP300 MED1 HDAC10 GTF2A1 SRA1 GTF2E1 PPARGC1A HDAC6 HDAC3 GTF2F1 PHB2 PELP1 TBP HDAC5 GRIP1 ERCC3 CARM1 ESR1 MEF2C HDAC9 NRIP1 HIST2H3C NCOR2 POLR2A HDAC11	c2.cp
BIOCARTA_HDAC_PATHWAY	0.997542	1	-0.156276	-0.471368	4057	27	CALM3 MEF2D PPP3CB CALM1 IGF1 PIK3R1 YWHAH MEF2A MEF2C CALM2 PPP3CA CAMK1G CABIN1	c2.cp
BIOCARTA_EIF_PATHWAY	0.804191	1	-0.286745	-0.762143	3568	16	EIF4G3 EEF2 EIF4E EIF3A EIF4G2 EIF4G1 EIF1AX EIF4A2 EIF2S3 EIF6 EIF5 EIF2S1 EIF4A1 EEF2K EIF1 EIF2S2	c2.cp
BIOCARTA_MTOR_PATHWAY	0.971238	1	0.208026	0.556564	5672	23	EIF4EBP1 RPS6 PIK3CA RPS6KB1 EIF4A1 FKBP1A MKNK1 EIF4B PTEN AKT1 EIF4A2 EIF4G1 EIF4G2 EIF3A PPP2CA EIF4E TSC1 PDK2 PDPK1 MTOR EIF4G3 PIK3R1 TSC2	c2.cp
BIOCARTA_IGF1R_PATHWAY	0.925238	1	-0.228146	-0.656253	3885	22	ADCY1 MAP2K1 PIK3R1 YWHAH MAPK1 PRKAR1A PRKACB PRKAR1B PRKAR2A AKT1 GRB2 MAPK3 PRKAR2B HRAS IRS1 RAF1 BAD SOS1 PIK3CA RPS6KA1 IGF1R SHC1	c2.cp
BIOCARTA_RARRXR_PATHWAY	0.988622	1	0.194961	0.47256	5473	15	KAT2B RXRA NCOA3 GTF2B NCOA1	c2.cp
BIOCARTA_PTDINS_PATHWAY	0.905496	1	0.248689	0.665355	5288	23	BTK JAG1 LYN	c2.cp
BIOCARTA_EDG1_PATHWAY	0.940997	1	0.230676	0.634672	5565	26	S1PR1 SPHK1 ITGAV SMPD2 PIK3CG PDGFRA ITGB3 RHOA PIK3CA	c2.cp
BIOCARTA_RAC1_PATHWAY	0.885212	1	0.257193	0.68166	5135	22	NCF2 PIK3CG MAP3K1 VAV1 PDGFRA	c2.cp
BIOCARTA_BAD_PATHWAY	0.794758	1	0.281908	0.76253	4669	24	CSF2RB IL3RA BCL2 PIK3CG IGF1R RPS6KA1 PIK3CA BCL2L1 BAD	c2.cp
BIOCARTA_EIF4_PATHWAY	0.998128	1	0.149156	0.403452	5864	24	EIF4EBP1 PABPC1 GHR PIK3CA IRS1 RPS6KB1 EIF4A1 MKNK1 MAPK14 PRKCA MAPK3 PTEN AKT1 EIF4A2 EIF4G1 EIF4G2 EIF4E PDK2 PDPK1 MTOR MAPK1 EIF4G3 PIK3R1	c2.cp
BIOCARTA_ERK5_PATHWAY	0.920819	1	-0.24002	-0.646984	4046	17	NTRK1 MEF2D PIK3R1 MAPK1 MEF2A MEF2C	c2.cp
BIOCARTA_MAL_PATHWAY	0.883916	1	-0.251763	-0.696749	3791	19	LIMK1 MAP2K1 MAPK1 MAPK8 HNF1A MAP4K2 MAL CDC42	c2.cp
BIOCARTA_CDC42RAC_PATHWAY	0.942847	1	0.236139	0.581215	5245	16	ARPC1B PDGFRA RHOA PIK3CA ARPC3 ARPC5	c2.cp
BIOCARTA_GPCR_PATHWAY	0.889497	1	0.245904	0.702924	5360	32	FOS NFATC4 NFATC2 NFATC1 ELK1 JUN NFATC3	c2.cp
BIOCARTA_IGF1MTOR_PATHWAY	0.877031	1	0.263855	0.684672	5020	20	EIF4EBP1 RPS6 INPPL1 IGF1R PIK3CA EIF2S2	c2.cp
BIOCARTA_SPRY_PATHWAY	0.915134	1	0.249139	0.63063	5175	18	EGFR SPRY1 SHC1 PTPRB SOS1 RAF1	c2.cp
BIOCARTA_TALL1_PATHWAY	0.930829	1	0.250004	0.605978	5153	15	RELA TNFSF13B TNFSF13 NFKB1 TRAF2 CHUK	c2.cp
BIOCARTA_TPO_PATHWAY	0.893465	1	0.249529	0.674947	5249	24	FOS STAT5A PIK3CG STAT3 JAK2 JUN SHC1 PIK3CA STAT5B SOS1 RAF1	c2.cp
BIOCARTA_ACTINY_PATHWAY	0.931878	1	0.240371	0.623734	5334	20	ARPC1B WASF2 PIR NCK1 ARPC3 ARPC5	c2.cp
ST_INTEGRIN_SIGNALING_PATHWAY	0.927184	1	0.215849	0.726381	6251	81	ITGA10 ITGA5 ITGA1 VASP CAV1 CDKN2A WAS MRAS PLCG2 ROCK1 ITGA6 ARHGEF6 TLN1 ITGA8 PAK4 ITGA11 PAK2 ITGA7 SHC1 DOCK1 FYN ILK SOS2 PIK3CA	c2.cp
ST_WNT_BETA_CATENIN_PATHWAY	0.995176	1	-0.163798	-0.518761	3919	33	CER1	c2.cp
ST_JNK_MAPK_PATHWAY	0.979707	1	0.201234	0.598219	6082	39	IL1R1 GADD45A TAB2 GAB1 MAP3K1 JUN TP53 NFATC3 SHC1 MAP3K2 GCK MAP3K5 MAP3K7	c2.cp
SA_PTEN_PATHWAY	0.942207	1	-0.228096	-0.614842	4140	17	IPCEF1 AKT3 MAPK1 PDPK1 PTK2B AKT2 AKT1 GRB2 BPNT1 PTEN MAPK3 PIK3CD SOS1 RBL2 PIK3CA ILK SHC1	c2.cp
PID_FANCONI_PATHWAY	0.995858	1	0.169647	0.514193	6250	43	HES1 FANCC FANCE FANCI FANCB FANCL RFC4 CHEK1 BLM H2AFX ATM	c2.cp
PID_ERBB4_PATHWAY	0.878842	1	0.246398	0.725265	5432	37	YAP1 STAT5A ERBB2 TAB2 LRIG1 JAK2 SHC1 WWOX FYN PIK3CA	c2.cp
PID_AURORA_B_PATHWAY	0.826038	1	0.257361	0.761974	5132	38	VIM CENPA AURKB PPP1CC AURKC SMC4 BIRC5 RHOA	c2.cp
PID_HDAC_CLASSII_PATHWAY	0.759584	1	-0.26004	-0.823569	2991	33	CAMK4 TUBB2A TUBA1B GATA1	c2.cp
PID_BETA_CATENIN_DEG_PATHWAY	0.910808	1	-0.243255	-0.655705	4002	17	SSPO	c2.cp
PID_DNA_PK_PATHWAY	0.932243	1	0.242431	0.596701	5186	16	DNTT NHEJ1 APLF DCLRE1C APTX CSNK2B	c2.cp
PID_ATR_PATHWAY	0.97407	1	0.206494	0.613857	6047	39	CDK2 CCNA2 TIMELESS CDC25A CDC6 MCM7 RFC4 CHEK1 RAD51	c2.cp
PID_EPHB_FWD_PATHWAY	0.95776	1	0.215314	0.64385	5985	40	EPHB4 PXN RRAS ROCK1 EFNB1 RAP1A RAP1B	c2.cp
PID_PS1_PATHWAY	0.92099	1	0.224076	0.688669	5839	46	MYC FOS DLL1 FZD1 HDAC1 DKK1 TLE1 CCND1 NOTCH1 JUN	c2.cp
PID_CDC42_PATHWAY	0.911601	1	0.222239	0.73151	6042	69	ARPC1B EPS8 YES1 CDH1 DIAPH3 IQGAP1 PAX6 ARHGEF6 LIMK2 MAP3K1 PAK4 MAP2K3 F2RL2 JUN PAK2 ENAH	c2.cp
PID_CDC42_REG_PATHWAY	0.924164	1	0.233837	0.662343	5556	30	DOCK6 BCAR3 ARHGEF6 DOCK11 ARHGAP17 VAV3 SPATA13 DNMBP GIT1	c2.cp
PID_ATM_PATHWAY	0.976414	1	0.201915	0.581294	5919	33	CHEK2 CDC25A UIMC1 BLM H2AFX ATM BID SMC3 TRIM28 BRCA1 CDC25C ABL1 DCLRE1C	c2.cp
PID_WNT_CANONICAL_PATHWAY	0.961485	1	0.216967	0.556728	5491	19	CAV1 FZD5 PPP2R5A LRP6 PIP5K1B DVL1 AXIN1 DVL2	c2.cp
PID_CIRCADIAN_PATHWAY	0.778037	1	0.309309	0.76131	4328	16	TIMELESS CRY1 PER1 NR1D1 CHEK1 ARNTL BHLHE40 NONO	c2.cp
PID_NFAT_3PATHWAY	0.949396	1	0.21203	0.669062	6134	53	SFN MAP3K8 NFATC2 PIM1 PRKCH NFATC1 BCL2	c2.cp
PID_CONE_PATHWAY	0.909712	1	-0.238703	-0.67743	3858	21	GRK1 GUCA1A SLC24A2 RPE65 RDH12 GUCA1C GNB5 ARR3	c2.cp
PID_ARF6_DOWNSTREAM_PATHWAY	0.957739	1	0.230171	0.557903	5302	15	PLAUR RHOA PLD2 ARF6	c2.cp
PID_IGF1_PATHWAY	0.963981	1	0.210365	0.59183	5753	29	PXN SHC1 IGF1R PIK3CA IRS2 SOS1 BAD RAF1 IRS1 CRK RPS6KB1	c2.cp
PID_PLK1_PATHWAY	0.969664	1	-0.195397	-0.655368	3611	43	SSPO PAK1 INCENP BUB1 TUBG1 PRC1 CLSPN KIF2A PPP2R1A ERCC6L SPC24 CENPE FZR1 TPX2	c2.cp
PID_P75_NTR_PATHWAY	0.842953	1	0.239435	0.781768	5549	66	NGFR BIRC3 MMP3 CASP6 RHOC MYD88 BCL2L11 NGF SMPD2 RIPK2 IKBKB MMP7 TP53 SHC1 RHOA ZNF274 CHUK PLG PIK3CA	c2.cp
PID_ERBB2_ERBB3_PATHWAY	0.99557	1	0.171832	0.523578	6291	44	FOS NFATC4 ERBB2 STAT3 JAK2 JUN DOCK7 SHC1 PIK3CA SOS1 BAD RAF1	c2.cp
PID_TRKR_PATHWAY	0.99954	1	0.140394	0.452963	6520	61	NGFR DYNLT1 RAP1A NGF GAB1 RAP1B STAT3 RGS19 RIT1 CCND1 SHC1 RHOA DOCK1	c2.cp
PID_NEPHRIN_NEPH1_PATHWAY	0.994986	1	-0.168711	-0.521835	3968	30	NPHS1 MAPK9 MAP2K4 MAPK10 PIK3R1 MAPK8 PIK3CB PRKCZ	c2.cp
PID_RHODOPSIN_PATHWAY	0.874286	1	-0.247696	-0.712486	3671	22	RHO GRK1 GUCA1A PDE6B RPE65 RDH12 GUCA1C GNB5 CNGB1	c2.cp
PID_RETINOIC_ACID_PATHWAY	0.985199	1	0.191977	0.543774	5923	30	HDAC1 KAT2B RXRG RXRA RARG NCOA3 CDK1 VDR CDK7 CREBBP MNAT1 NCOA1 EP300	c2.cp
PID_ERBB1_INTERNALIZATION_PATHWAY	0.963072	1	-0.201931	-0.670194	3598	41	DNM1 SYNJ1 SH3GL2 AMPH CHMP3 ZFYVE28 EGF PIK3R1 EPS15 PIK3CB KRAS ARHGEF7 PTK2 CDC42	c2.cp
PID_CXCR3_PATHWAY	0.94672	1	0.21972	0.657026	5916	40	ITGB2 CXCL13 ITGAL GNAI3 MAP2K3 RICTOR PIK3CA GNAI2	c2.cp
PID_RAC1_REG_PATHWAY	0.910686	1	0.235542	0.697375	5658	38	DOCK2 EPS8 DOCK6 ARHGEF6 DEF6 VAV1 ARHGAP17 VAV3 ARHGAP9 SPATA13 TIAM2 DOCK1	c2.cp
PID_ARF_3PATHWAY	0.981268	1	0.199454	0.511792	5604	19	CD4 PLD2 KDELR1 CLTB PIP5K1A CYTH2 CLTA ARF1 RAC1 ARFIP2 ARFGAP1 USO1 COPA GGA3 GOSR2 ASAP1 AP2M1 AP2A1 GBF1	c2.cp
PID_MAPK_TRK_PATHWAY	0.986872	1	0.191824	0.555214	6013	34	FOS MAPKAPK2 RAP1A ELK1 RAP1B RIT1 MAP2K3 MAP3K2 RPS6KA1 RAF1 MAPK7 RPS6KA5 CREB1	c2.cp
REACTOME_RNA_POL_III_TRANSCRIPTION_INITIATION_FROM_TYPE_2_PROMOTER	0.937275	1	-0.222012	-0.643508	3899	23	LZTS1 POLR3A POLR3C BRF1 POLR3B POLR3K POLR2E POLR3F POLR3D	c2.cp
REACTOME_INHIBITION_OF_THE_PROTEOLYTIC_ACTIVITY_OF_APC_C_REQUIRED_FOR_THE_ONSET_OF_ANAPHASE_BY_MITOTIC_SPINDLE_CHECKPOINT_COMPONENTS	0.81082	1	0.291049	0.736715	4585	18	UBE2C CDC26 ANAPC11 CDC16 BUB3	c2.cp
REACTOME_PYRUVATE_METABOLISM_AND_CITRIC_ACID_TCA_CYCLE	0.88576	1	0.240802	0.720068	5535	40	PDK4 SLC16A3 SLC16A1 SUCLG2 IDH1 BSG SDHD	c2.cp
REACTOME_PTM_GAMMA_CARBOXYLATION_HYPUSINE_FORMATION_AND_ARYLSULFATASE_ACTIVATION	0.952739	1	-0.214474	-0.628094	3930	24	F7 STS ARSF EIF5A2 ARSB ARSG DOHH SUMF2	c2.cp
REACTOME_RNA_POL_I_TRANSCRIPTION_TERMINATION	0.997569	1	0.159456	0.417822	5745	21	PTRF POLR2H GTF2H2B CDK7 POLR1D MNAT1 TAF1B POLR1C TAF1A GTF2H2 POLR2K	c2.cp
REACTOME_BASE_EXCISION_REPAIR	0.837885	1	0.278826	0.715455	4785	19	POLD1 PCNA CCNO MUTYH POLD4 POLD2 MPG POLD3	c2.cp
REACTOME_SIGNALING_BY_WNT	0.959243	1	0.205527	0.665307	6283	62	PSMB8 FRAT2 PSMB9 PPP2R1B RPS27A PSME1 PSMB1 FRAT1 PSME2 PPP2CB UBA52 PPP2R5A PSMA2 PSMD6 AXIN1 CSNK1A1 PSMB3 PSMD9 PSMC5 PSMB10 PSMD10 PSMA7 CUL1 PSMA1 PSMA4 PSMB4 PSMD4 PSMF1 PSMA6 PSMB6 PSMB7 PSMA3 PSMD5 PSMD12 PSMD7 PSMC2 PSMC6 PSMD13 PSMD11 PSME4 SKP1 PPP2R5E APC PSMC3 CTNNB1 PSMC1 PPP2R5C PPP2CA PSMD8 PPP2R5D PSMC4 PSMD14 PSMD3 PSMB5 PSMA5 PSMB2 PSMD2 PSMD1 PSMA8 PPP2R1A PPP2R5B BTRC	c2.cp
REACTOME_METABOLISM_OF_NON_CODING_RNA	0.985193	1	-0.182205	-0.6235	3592	47	NUP93 NUP210 POM121 WDR77 NUP155 SEH1L GEMIN4 SMN2 NUP214 NUP153 NUP85 GEMIN5 NUP50 NUP133 PRMT5 TPR PHAX NUP62 NUP43 NUP107 NUP54 NUPL2 SNRPD1 NUP88 SNUPN SNRPB GEMIN7 NCBP1 GEMIN2 AAAS CLNS1A SMN1 GEMIN6 NUP35 DDX20 SNRPD2 SNRPD3 NUP188 RAE1 SNRPF RANBP2 TGS1 NCBP2 SNRPE NUP205 NUP37 SNRPG	c2.cp
REACTOME_SIGNALLING_BY_NGF	0.999871	1	0.152862	0.581727	7736	209	CDKN1A NFKBIA NGFR FOXO1 RELA PCSK5 FGD2 MYD88 ADORA2A MAPKAPK2 BCL2L11 ATF1 ITPR2 ITPR3 HDAC1 PLEKHG2 RAP1A NGF ARHGEF6 SMPD2 ELK1 FOXO4 PPP2R1B VAV1 STAT3 FGD4 RIPK2 RIT1 RPS27A VAV3 FGD3 IKBKB ARHGAP4 NET1 ADCY4 CDKN1B TIAM2 SHC1 RHOA RICTOR ARHGEF16 MAPKAPK3 ADCYAP1R1 CASP2 RPS6KA1 SOS2 CHUK AATF PIK3CA CDK1	c2.cp
REACTOME_CTNNB1_PHOSPHORYLATION_CASCADE	0.966227	1	0.222763	0.539949	5349	15	FRAT2 PPP2R1B FRAT1 PPP2CB PPP2R5A AXIN1 CSNK1A1	c2.cp
REACTOME_INSULIN_RECEPTOR_RECYCLING	0.915799	1	0.245664	0.643713	5274	21	TCIRG1 ATP6V0E1	c2.cp
REACTOME_TCA_CYCLE_AND_RESPIRATORY_ELECTRON_TRANSPORT	0.999013	1	0.162721	0.577519	7081	115	PDK4 SLC16A3 SLC16A1 SUCLG2 IDH1 UQCRHL BSG UCP3 SDHD ATP5E UCP2 COX5B NDUFB4 NDUFB1 ETFA ATP5I UQCR11 ETFDH NDUFS8 SUCLG1 UQCRB NDUFS6 NDUFV2 COX7C NDUFA11 NDUFB10 NDUFC1 COX6C ADHFE1 NDUFS7 NDUFA8 UQCRQ ATP5D NDUFB8 NDUFA13 NDUFB7 NDUFS5 NDUFA3 ATP5O NDUFA1 PDK1 NDUFB9 NDUFA12 COX6B1 COX4I1 PDP2 COX6A1 NDUFA2 NDUFA6 ATP5J NDUFS3 SDHB ETFB ATP5L ATP5J2 ATP5H COX7B NDUFB3 PDHX NDUFB6 LDHB DLST ID…	c2.cp
REACTOME_ABCA_TRANSPORTERS_IN_LIPID_HOMEOSTASIS	0.827759	1	-0.274341	-0.739499	3637	17	ABCG4 ABCD2 ABCG8 ABCG5 ABCA3	c2.cp
REACTOME_METABOLISM_OF_VITAMINS_AND_COFACTORS	0.998438	1	0.15047	0.469364	6392	50	ACP5 ENPP1 SLC19A3 NAMPT SLC2A1 MOCOS SHMT1 DHFR SLC2A3 QPRT MOCS1 NADK COASY CYB5A NADSYN1 PANK4 GSTO1 SLC19A2 SLC19A1 SLC46A1	c2.cp
REACTOME_TRANS_GOLGI_NETWORK_VESICLE_BUDDING	0.99816	1	0.156828	0.500875	6507	57	VAMP8 TPD52L1 SNAP23 TXNDC5 FTL DNASE2 CTSZ SNX9 IGF2R AP3B1 AP4E1	c2.cp
REACTOME_RESOLUTION_OF_AP_SITES_VIA_THE_MULTIPLE_NUCLEOTIDE_PATCH_REPLACEMENT_PATHWAY	0.762975	1	0.312545	0.780257	4277	17	POLD1 PCNA CCNO MUTYH POLD4 POLD2 MPG POLD3	c2.cp
REACTOME_ANTIVIRAL_MECHANISM_BY_IFN_STIMULATED_GENES	1	1	0.124483	0.4048	6566	64	HERC5 RPS27A IRF3 NUP37 PPM1B MX2 UBE2L6 NUP205 KPNA5 DDX58 UBA52 ISG15 RANBP2 USP18 EIF4A3 UBA7 RAE1 NEDD4 NUP188 EIF4A1 PLCG1	c2.cp
REACTOME_SIGNALING_BY_ERBB2	0.999678	1	-0.148033	-0.577472	3107	95	NRG1 CAMK4 ADCY1 ADCY7 PRKCG EREG CALM3 PRKCE PDE1A CALM1 MAP2K1 YWHAB TSC2 EGF PIK3R1 AKT3 PRKACA MAPK1 MTOR RNF41 ADCY6 PDPK1 GSK3A PRKCD PDE1B PRKAR1A NR4A1 ADCY5 CALM2 GRB7 KRAS	c2.cp
REACTOME_SPHINGOLIPID_DE_NOVO_BIOSYNTHESIS	0.906303	1	0.245398	0.679568	5377	27	ACER1 SPHK1 SGMS1 CERS2 CERS3 KDSR ACER2 SGMS2	c2.cp
REACTOME_TERMINATION_OF_O_GLYCAN_BIOSYNTHESIS	0.845827	1	0.278253	0.704325	4783	18	ST6GALNAC2 MUC16 ST6GALNAC3 MUCL1 ST6GAL1 MUC19 MUC15 MUC4	c2.cp
REACTOME_GRB2_EVENTS_IN_ERBB2_SIGNALING	0.94881	1	-0.216533	-0.622849	3984	22	NRG1 EREG MAP2K1 YWHAB EGF MAPK1	c2.cp
REACTOME_SIGNALING_BY_EGFR_IN_CANCER	0.999673	1	-0.151034	-0.597877	3055	103	CAMK4 ADCY1 ADCY7 PRKCG CALM3 PRKCE CLTC SH3GL2 PDE1A CALM1 MAP2K1 YWHAB TSC2 AP2A1 AP2M1 EGF PIK3R1 EPS15 AKT3 PRKACA STAM MAPK1 MTOR ADCY6 PDPK1 GSK3A AP2B1 PRKCD PDE1B PRKAR1A NR4A1 ADCY5 CALM2 KRAS	c2.cp
REACTOME_PI3K_EVENTS_IN_ERBB4_SIGNALING	0.991538	1	0.185473	0.542857	6092	36	CDKN1A FOXO1 FOXO4 CDKN1B RICTOR CHUK PIK3CA BAD PHLPP1 AKT1S1 CREB1	c2.cp
REACTOME_PI3K_EVENTS_IN_ERBB2_SIGNALING	0.759898	1	0.269089	0.811762	4759	42	CDKN1A EGFR FOXO1 ERBB2 GAB1 FOXO4 CDKN1B RICTOR CHUK PIK3CA BAD PHLPP1 AKT1S1 CREB1	c2.cp
REACTOME_MITOCHONDRIAL_PROTEIN_IMPORT	0.959978	1	-0.198661	-0.682832	3501	48	TIMM23B TIMM8A SLC25A13 ATP5B TOMM20 VDAC1 MTX2 ATP5G1 TIMM17A ATP5A1 TIMM10 FXN CYC1 TOMM40 CS SLC25A12 SAMM50 TIMM50 TIMM13 SLC25A4 ACO2 IDH3G DNAJC19 BCS1L SLC25A6 LDHD	c2.cp
REACTOME_DOWNSTREAM_SIGNALING_EVENTS_OF_B_CELL_RECEPTOR_BCR	0.835764	1	0.233149	0.802397	5729	92	CDKN1A NFKBIA FOXO1 RELA PSMB8 FOXO4 PSMB9 MALT1 RPS27A REL PSME1 IKBKB CDKN1B PSMB1 RICTOR BCL10 CHUK MAP3K7 NFKBIB PSME2 BAD PHLPP1 UBA52 PSMA2 AKT1S1 CREB1 PSMD6	c2.cp
REACTOME_TRIGLYCERIDE_BIOSYNTHESIS	0.910812	1	-0.22201	-0.717723	3512	36	GPD1 FASN ACLY LPCAT4 DGAT2 AGPAT4 ACACA ACSL6 ELOVL1 LCLAT1 ELOVL4	c2.cp
REACTOME_INSULIN_RECEPTOR_SIGNALLING_CASCADE	0.85727	1	0.233062	0.781209	5759	79	FGF23 FGF2 EIF4EBP1 DOK1 FGF17 FGFR4 RPS6 GAB1 TLR9 CAB39L FGF18 SHC1 FGF10 PIK3CA CDK1 IRS2 STRADB INSR FGFR3 SOS1 RAF1 FRS2 IRS1	c2.cp
REACTOME_ARMS_MEDIATED_ACTIVATION	0.970648	1	-0.208622	-0.562351	4265	17	NTRK1 MAP2K1 YWHAB KIDINS220 MAPK1 KRAS BRAF	c2.cp
REACTOME_PROLONGED_ERK_ACTIVATION_EVENTS	0.99324	1	-0.171955	-0.475881	4260	19	NTRK1 MAP2K1 YWHAB KIDINS220 MAPK1 KRAS BRAF	c2.cp
REACTOME_SIGNALLING_TO_RAS	0.999494	1	0.136591	0.378254	5930	27	MAPKAPK2 NGF SHC1 MAPKAPK3 CDK1 SOS1 RAF1 RALGDS	c2.cp
REACTOME_NGF_SIGNALLING_VIA_TRKA_FROM_THE_PLASMA_MEMBRANE	0.97683	1	-0.183087	-0.751748	2655	132	RIT2 DUSP4 CAMK4 ADCY1 ADCY7 PRKCG CALM3 ADCYAP1 DNM1 NTRK1 PRKCE CLTC SH3GL2 PDE1A CALM1 MAP2K1 DUSP6 YWHAB TSC2 AP2A1 AP2M1 PIK3R1 KIDINS220 AKT3 PRKACA PPP2R1A MAPK13 DNAL4 DUSP3 MAPK1 MTOR ADCY6 PDPK1 MEF2A GSK3A AP2B1 PRKCD MEF2C PDE1B PIK3CB MAPK12 PRKAR1A NR4A1 MAP2K5 ADCY5 CALM2 KRAS PRKACB SHC3 BRAF	c2.cp
REACTOME_SIGNALLING_TO_ERKS	0.999675	1	0.124938	0.365677	6142	36	MAPKAPK2 RAP1A NGF RIT1 SHC1 MAPKAPK3 CDK1 SOS1 RAF1 FRS2	c2.cp
REACTOME_SIGNALING_BY_FGFR_IN_DISEASE	0.995358	1	0.175841	0.6251	7075	116	CDKN1A FGF23 FGF2 FOXO1 STAT5A FGF17 ITPR2 FGFR4 ITPR3 GAB1 FOXO4 STAT3 FGFR1OP2 RPS27A ADCY4 CDKN1B FGF18 SHC1 RICTOR CHUK FGF10 PIK3CA CDK1 STAT5B CNTRL FGFR3 SOS1 BAD PPP2CB PHLPP1 RAF1 IL17RD FRS2 UBA52 AKT1S1 FGFR1 CREB1	c2.cp
REACTOME_P53_INDEPENDENT_G1_S_DNA_DAMAGE_CHECKPOINT	0.812402	1	0.253128	0.783416	5161	48	CHEK2 PSMB8 PSMB9 CDC25A RPS27A PSME1 CHEK1 PSMB1 ATM PSME2 UBA52 PSMA2 PSMD6	c2.cp
REACTOME_PHOSPHOLIPID_METABOLISM	0.999582	1	-0.154406	-0.66277	2390	183	GPD1 GPCPD1 PNPLA3 PLA2G2D PLA2G3 INPP5J PHOSPHO1 PI4KA PIK3C2G STS PLA2G4C NEU3 MTMR7 PLA2G5 SYNJ1 ARSF GBA LPCAT4 PLA2G4F VAPB DGAT2 SMPD3 ASAH2 PPM1L AGPAT4 SGPP2 LCLAT1 ARF3 CDS1 MTMR4 CERS6 ARSB PLA2G1B ARSG CDS2 PIK3R1 PLD3 GAL3ST1 PCYT1B SUMF2 NEU4 FIG4 TPTE2 PLA2G6 VAC14 PCYT2 AGPAT1 LPGAT1 PIK3CB AGPAT3 SPHK2 PIK3C2B ARSA SLC44A5 CDIPT PIP5K1C DEGS2 PSAP	c2.cp
REACTOME_SYNTHESIS_OF_PIPS_AT_THE_PLASMA_MEMBRANE	0.986197	1	0.191114	0.54133	5929	30	PIK3R5 MTM1 PIK3CG INPPL1 PI4K2B INPP4B PIK3CA PIK3R6 PIK3C2A PIP5K1B PIP4K2A MTMR3 PIK3CD	c2.cp
REACTOME_SIGNALING_BY_FGFR1_FUSION_MUTANTS	0.817185	1	0.28846	0.73016	4621	18	STAT5A STAT3 FGFR1OP2 PIK3CA STAT5B CNTRL	c2.cp
REACTOME_PI_METABOLISM	0.980806	1	-0.18596	-0.636348	3576	47	INPP5J PI4KA PIK3C2G MTMR7 SYNJ1 ARF3 MTMR4 PIK3R1 FIG4 TPTE2 VAC14 PIK3CB PIK3C2B PIP5K1C PI4K2A OCRL PIK3R4 MTMR6 INPP5E PIP4K2B PIK3C3	c2.cp
REACTOME_GLYCEROPHOSPHOLIPID_BIOSYNTHESIS	0.986283	1	0.188631	0.629167	6614	76	PLA2G2A PLBD1 LPIN3 SLC44A3 LPCAT2 CHPT1 HADHB MBOAT1 SLC44A4 GPAM AGPAT2	c2.cp
REACTOME_CDK_MEDIATED_PHOSPHORYLATION_AND_REMOVAL_OF_CDC6	0.792462	1	0.258256	0.793716	5024	46	CDK2 PSMB8 PSMB9 RPS27A PSME1 CDC6 PSMB1 PSME2 UBA52 PSMA2 PSMD6	c2.cp
REACTOME_MICRORNA_MIRNA_BIOGENESIS	0.97896	1	0.202716	0.513123	5536	18	POLR2J POLR2H POLR2L DICER1 POLR2I POLR2K POLR2G POLR2F RAN POLR2D TARBP2 POLR2C DROSHA XPO5 POLR2B DGCR8 POLR2E	c2.cp
REACTOME_NUCLEAR_EVENTS_KINASE_AND_TRANSCRIPTION_FACTOR_ACTIVATION	0.984513	1	0.192571	0.520883	5784	24	MAPKAPK2 ATF1 ELK1 PPP2R1B RPS6KA1 PPP2CB MAPK7 RPS6KA5 CREB1	c2.cp
REACTOME_REGULATORY_RNA_PATHWAYS	0.973611	1	0.210699	0.552093	5607	21	POLR2J POLR2H POLR2L DICER1 TNRC6B POLR2I POLR2K POLR2G POLR2F TNRC6C RAN TNRC6A POLR2D TARBP2 POLR2C DROSHA XPO5 POLR2B DGCR8 POLR2E	c2.cp
REACTOME_EGFR_DOWNREGULATION	0.958556	1	-0.210548	-0.616597	3954	24	CLTC SH3GL2 AP2A1 AP2M1 EGF EPS15 STAM AP2B1	c2.cp
REACTOME_SHC1_EVENTS_IN_EGFR_SIGNALING	0.971465	1	0.217152	0.526347	5378	15	EGFR SHC1 CDK1 SOS1 RAF1	c2.cp
REACTOME_ERK_MAPK_TARGETS	0.933522	1	-0.228575	-0.648687	3959	21	DUSP4 DUSP6 PPP2R1A DUSP3 MAPK1 MEF2A MEF2C	c2.cp
REACTOME_GENERIC_TRANSCRIPTION_PATHWAY	0.8076	1	0.219612	0.87243	6736	334	TBX5 TEAD2 YAP1 WWTR1 PGR TGIF1 TEAD4 MYC SERPINE1 JUNB TEAD3 NOTCH2 CTGF NR2E1 PPARA MAML2 NR2E3 TGIF2 SP1 CDKN2B TEAD1 HDAC1 NR0B1 ZNF577 ZNF480 NR5A2 SMAD4 NOTCH4 E2F5 NOTCH3 RUNX2 KAT2B RXRG NR2F1 RBL1 ZNF114 RXRA TBL1X ZNF571 NR1H3 RPS27A ZNF141 ZNF558 ZNF420 ZNF547 NR1D1 HNF4G ZNF30 MED30 ZNF599 SMURF2 ZNF254 RARG SKIL SMAD7 ZNF614 ZNF442 RORA ZIM3 ZNF274 ZNF582 ZNF621 ZNF431 ZNF394 ZNF92 Z…	c2.cp
REACTOME_TRANSPORT_OF_MATURE_TRANSCRIPT_TO_CYTOPLASM	0.99944	1	-0.148833	-0.516993	3568	51	NUP93 NUP210 POM121 NUP155 SEH1L CDC40 EIF4E NUP214 RNPS1 SRSF2 SRRM1 NUP153 NUP85 NFX1 NUP50 CPSF3 CPSF1 NUP133 DHX38 TPR RBM8A NUP62 NUP43 NUP107 NUP54 NUPL2 NUP88 NCBP1 SRSF6 AAAS SRSF5 SLBP U2AF2 NUP35 UPF3B NUP188 RAE1 SRSF11 SRSF9 SRSF4 RANBP2 SRSF3 SRSF7 NCBP2 MAGOH NUP205 CPSF2 NXF1 SRSF1 NUP37	c2.cp
REACTOME_FATTY_ACYL_COA_BIOSYNTHESIS	0.954562	1	0.223157	0.564864	5398	18	ACSL5 ELOVL7 SLC25A1 ELOVL5 ELOVL2 ACSL1	c2.cp
REACTOME_REGULATION_OF_ORNITHINE_DECARBOXYLASE_ODC	0.849544	1	0.244946	0.758093	5397	48	PSMB8 PSMB9 NQO1 PSME1 PSMB1 PSME2 PSMA2 PSMD6 PSMB3 PSMD9 PSMC5 PSMB10 PSMD10 PSMA7 PSMA1 OAZ1 PSMA4 PSMB4 PSMD4 PSMF1 PSMA6 PSMB6 ODC1 PSMB7 PSMA3 PSMD5 PSMD12 OAZ2 PSMD7 PSMC2 PSMC6 PSMD13 PSMD11 PSME4 PSMC3 PSMC1 PSMD8 PSMC4 PSMD14 PSMD3 PSMB5 PSMA5 PSMB2 OAZ3 PSMD2 AZIN1 PSMD1 PSMA8	c2.cp
REACTOME_NRAGE_SIGNALS_DEATH_THROUGH_JNK	0.86108	1	0.245835	0.745118	5404	43	NGFR FGD2 BCL2L11 PLEKHG2 NGF ARHGEF6 VAV1 FGD4 VAV3 FGD3 ARHGAP4 NET1 TIAM2 ARHGEF16 SOS2 AATF	c2.cp
REACTOME_REGULATION_OF_APOPTOSIS	0.93541	1	0.216915	0.69106	6096	56	ARHGAP10 PSMB8 PSMB9 RPS27A PSME1 PAK2 PSMB1 PSME2 UBA52 PSMA2 PSMD6 PSMB3 PSMD9 PSMC5 PSMB10 PSMD10 PSMA7 PSMA1 PSMA4 CASP3 PSMB4 PSMD4 DAPK3 PSMF1 PSMA6 PSMB6 PSMB7 PSMA3 PSMD5 APPL1 PSMD12 DAPK1 PSMD7 PSMC2 PSMC6 PSMD13 PSMD11 CASP9 PSME4 PSMC3 PSMC1 PSMD8 PSMC4 PSMD14 UNC5B PSMD3 PSMB5 PSMA5 PSMB2 PSMD2 DAPK2 UNC5A PSMD1 PSMA8 DCC MAGED1	c2.cp
REACTOME_RNA_POL_II_TRANSCRIPTION	0.835056	1	0.233646	0.806444	5735	94	U2AF1 GTF2E2 PAPOLA POLR2J SNRPG POLR2H PCF11 TAF12 TAF4 LSM10 GTF2H2B TCEA1 SRSF1 POLR2L CPSF2 GTF2F2 CSTF3 MAGOH SNRPE ZNF473 NCBP2 SRSF7 GTF2B SRSF3 TAF5 CCNT1 PABPN1 SRSF4 GTF2A2 SRSF9 SNRPF CDK7 SRSF11 MNAT1 UPF3B SNRPD3 SUPT4H1 U2AF2 CSTF1 SLBP SRSF5 CDK9 POLR2I	c2.cp
REACTOME_RNA_POL_III_TRANSCRIPTION	0.985783	1	-0.18639	-0.590311	3882	33	LZTS1 POLR3A POLR3C BRF1 POLR3B POLR3K SNAPC4 POLR2E POLR3F POLR3D GTF3C2 TBP GTF3C4 SNAPC2 SNAPC5 POLR3E SNAPC3 POLR2F BRF2 POU2F1 POLR3H POLR2K POLR1C GTF3C5 SSB GTF3C3 POLR1D SNAPC1 POLR2L POLR3GL NFIB POLR2H ZNF143	c2.cp
REACTOME_CELL_DEATH_SIGNALLING_VIA_NRAGE_NRIF_AND_NADE	0.88865	1	0.23018	0.735146	5793	57	NGFR FGD2 BCL2L11 PLEKHG2 NGF ARHGEF6 VAV1 FGD4 RPS27A VAV3 FGD3 ARHGAP4 NET1 TIAM2 ARHGEF16 CASP2 SOS2 AATF	c2.cp
REACTOME_MRNA_CAPPING	0.998016	1	-0.162392	-0.498107	4024	29	RNMT GTF2H4 POLR2A GTF2H1 POLR2E ERCC3 ERCC2 POLR2B GTF2H3 POLR2C POLR2D CCNH GTF2F1 SUPT5H POLR2F POLR2G RNGTT NCBP1 POLR2K GTF2H2 POLR2I MNAT1 CDK7 NCBP2 GTF2F2 POLR2L GTF2H2B POLR2H POLR2J	c2.cp
REACTOME_INTEGRATION_OF_ENERGY_METABOLISM	0.946887	1	0.205578	0.723785	6631	108	GATA4 GCGR GNG11 GNG12 GNG5 GLP1R CDX2 IQGAP1 ITPR2 PLCB3 ITPR3 SLC2A1 PAX6 GNA14 RAP1A GNG8 RAP1B PPP2R1B SEC11A RAPGEF3 ACACB	c2.cp
REACTOME_GLUCONEOGENESIS	0.919175	1	0.236264	0.669218	5526	30	PCK1 PGAM2 ALDOB SLC25A1 FBP1	c2.cp
REACTOME_OPIOID_SIGNALLING	0.999701	1	0.15379	0.510417	6688	73	GNG11 GNAT1 GNG12 GNG5 ITPR2 PLCB3 ITPR3 PPP1R1B GNG8 PPP2R1B GNAI3 GNG10 PDYN ADCY4 GNGT2 PDE4D	c2.cp
REACTOME_MITOCHONDRIAL_TRNA_AMINOACYLATION	0.793729	1	-0.273267	-0.775522	3366	21	AARS2 VARS2 SARS2 EARS2 QARS GARS MARS2 TARS2 RARS2 IARS2	c2.cp
REACTOME_ABC_FAMILY_PROTEINS_MEDIATED_TRANSPORT	0.929738	1	0.230028	0.662228	5636	33	ABCC2 ABCC4 ABCA6 ABCB1 ABCB5 APOA1 ABCA8 ABCC6 ABCA4 ABCC9	c2.cp
REACTOME_HOMOLOGOUS_RECOMBINATION_REPAIR_OF_REPLICATION_INDEPENDENT_DOUBLE_STRAND_BREAKS	0.837999	1	0.291416	0.706355	4639	15	RAD52 RAD51 H2AFX ATM BRCA2 BRCA1	c2.cp
REACTOME_TRANSCRIPTION_COUPLED_NER_TC_NER	0.946519	1	0.216203	0.658779	5981	44	POLD1 POLR2J PCNA POLR2H ERCC5 GTF2H2B TCEA1 RFC4 POLR2L POLD4 POLD2 POLE2 XAB2 CDK7 MNAT1	c2.cp
REACTOME_RNA_POL_II_TRANSCRIPTION_PRE_INITIATION_AND_PROMOTER_OPENING	0.99312	1	0.176742	0.528509	6206	40	GTF2E2 POLR2J POLR2H TAF12 TAF4 GTF2H2B POLR2L GTF2F2 GTF2B TAF5 GTF2A2 CDK7 MNAT1	c2.cp
REACTOME_MRNA_PROCESSING	0.932748	1	0.206957	0.761066	6906	151	PTBP1 YBX1 HNRNPF U2AF1 PAPOLA HNRNPH1 POLR2J SNRPG SNRPA POLR2H PCF11 HNRNPA2B1 NUP37 LSM10 GTF2H2B CCAR1 HNRNPC LSM2 SRSF1 POLR2L NXF1 CPSF2 DDX23 GTF2F2 CSTF3 PCBP2 NUP205 PHF5A MAGOH SNRPE SF3B2 ZNF473 NCBP2 SRSF7 SRSF3 RANBP2 SF3B1 PCBP1 PABPN1 HNRNPD SRSF4 SNRPB2 SRSF9 SNRPF CDK7 HNRNPM SRSF11 RAE1 NUP188 HNRNPR MNAT1 UPF3B SNRPD3 SNRPD2 HNRNPU NUP35 A1CF U2AF2 CSTF1 SLBP HNRNPUL1 SMC1A SRS…	c2.cp
REACTOME_ASSOCIATION_OF_TRIC_CCT_WITH_TARGET_PROTEINS_DURING_BIOSYNTHESIS	0.973288	1	0.207204	0.570094	5756	26	SPHK1 FBXL3 KIF13A XRN2 FBXW4 FBXL5 CCT3 CCT5 FBXO6 AP3M1 CCT8 CCT4 TCP1	c2.cp
REACTOME_PROTEIN_FOLDING	0.939705	1	-0.206274	-0.714238	3381	50	TUBB3 TUBB2A TUBA1B TUBB4A TUBA1A TUBA4A FBXW7	c2.cp
REACTOME_PEROXISOMAL_LIPID_METABOLISM	0.962271	1	0.219958	0.570763	5508	20	ACOX2 IDH1 HSD17B4 SLC27A2	c2.cp
REACTOME_DOWNSTREAM_SIGNAL_TRANSDUCTION	1	1	-0.14322	-0.551328	3172	89	CAMK4 ADCY1 ADCY7 PRKCG CALM3 PRKCE PDE1A CALM1 MAP2K1 YWHAB TSC2 PIK3R1 AKT3 PRKACA STAT1 MAPK1 MTOR ADCY6 PDPK1 GSK3A PRKCD PDE1B PIK3CB PRKAR1A NR4A1 ADCY5 CALM2 GRB7 KRAS	c2.cp
REACTOME_CITRIC_ACID_CYCLE_TCA_CYCLE	0.95035	1	-0.215915	-0.59754	4076	19	SUCLA2 MDH2 DLD SDHC IDH3A CS OGDH IDH2 NNT FH ACO2 IDH3G	c2.cp
REACTOME_NUCLEOTIDE_EXCISION_REPAIR	0.960941	1	0.20775	0.644981	6125	49	POLD1 POLR2J PCNA POLR2H ERCC5 DDB2 GTF2H2B TCEA1 RFC4 POLR2L POLD4 POLD2 POLE2 XAB2 CDK7 MNAT1	c2.cp
REACTOME_REGULATION_OF_INSULIN_SECRETION	0.76331	1	0.248854	0.837451	5146	81	GATA4 GNG11 GNG12 GNG5 GLP1R CDX2 IQGAP1 ITPR2 PLCB3 ITPR3 SLC2A1 PAX6 GNA14 RAP1A GNG8 RAP1B	c2.cp
REACTOME_INHIBITION_OF_INSULIN_SECRETION_BY_ADRENALINE_NORADRENALINE	0.826413	1	0.272572	0.737276	4855	24	GNG11 GNG12 GNG5 GNG8 GNG10 GNGT2	c2.cp
REACTOME_TRANSPORT_OF_MATURE_MRNA_DERIVED_FROM_AN_INTRONLESS_TRANSCRIPT	0.938064	1	-0.218624	-0.681816	3740	31	NUP93 NUP210 POM121 NUP155 SEH1L EIF4E NUP214 NUP153 NUP85 NUP50 CPSF3 CPSF1 NUP133 TPR NUP62 NUP43 NUP107 NUP54 NUPL2 NUP88 NCBP1 AAAS NUP35 NUP188 RAE1 RANBP2 NCBP2 NUP205 CPSF2 NXF1 NUP37	c2.cp
REACTOME_FANCONI_ANEMIA_PATHWAY	0.801471	1	0.291876	0.748941	4577	19	FANCC FANCE RPS27A FANCB FANCL ATM UBA52 BRCA2 BRCA1 USP1	c2.cp
REACTOME_FORMATION_OF_RNA_POL_II_ELONGATION_COMPLEX_	0.995118	1	0.17671	0.517208	6114	36	POLR2J POLR2H GTF2H2B TCEA1 POLR2L GTF2F2 NCBP2 CCNT1 CDK7 MNAT1 SUPT4H1 CDK9 POLR2I GTF2H2 POLR2K NCBP1 ELL SSRP1 CTDP1 POLR2G POLR2F SUPT5H GTF2F1 CCNT2 CCNH POLR2D POLR2C GTF2H3 POLR2B ERCC2 ERCC3 POLR2E SUPT16H GTF2H1	c2.cp
REACTOME_POST_TRANSLATIONAL_MODIFICATION_SYNTHESIS_OF_GPI_ANCHORED_PROTEINS	0.847675	1	0.263342	0.72455	5013	26	PLAUR PIGA DPM3 PIGV PIGF DPM1 PIGC PIGH PIGP PIGB	c2.cp
REACTOME_ELONGATION_ARREST_AND_RECOVERY	0.970899	1	0.207339	0.560829	5704	24	POLR2J POLR2H TCEA1 POLR2L GTF2F2 CCNT1 SUPT4H1 CDK9 POLR2I POLR2K	c2.cp
REACTOME_SEMA4D_INDUCED_CELL_MIGRATION_AND_GROWTH_CONE_COLLAPSE	0.799932	1	0.279765	0.763239	4721	25	RAC2 RHOC ERBB2 ROCK1 LIMK2 PLXNB1 RHOA MYL6 MYH9	c2.cp
REACTOME_LYSOSOME_VESICLE_BIOGENESIS	0.900745	1	-0.2394	-0.693906	3747	23	AP1M2 DNAJC6 CLTC VAMP2 SH3GL2 ARRB1 AP1B1 AP1M1 HSPA8	c2.cp
REACTOME_SPHINGOLIPID_METABOLISM	0.967223	1	-0.193339	-0.69548	3363	61	STS NEU3 ARSF GBA VAPB SMPD3 ASAH2 PPM1L SGPP2 CERS6 ARSB ARSG GAL3ST1 SUMF2 NEU4 SPHK2 ARSA DEGS2 PSAP	c2.cp
REACTOME_G_ALPHA_Z_SIGNALLING_EVENTS	0.954899	1	-0.203645	-0.683032	3556	43	PRKCQ ADCY1 RGS4 ADCY7 PRKCG GNG13 ADRA2A PRKCB PRKCE GNG3	c2.cp
REACTOME_SIGNALING_BY_ROBO_RECEPTOR	0.934253	1	-0.221302	-0.672477	3793	28	PAK1 ROBO2 GPC1 CAP2 PAK6 PFN2 SRGAP2 SRGAP3 EVL	c2.cp
REACTOME_GOLGI_ASSOCIATED_VESICLE_BIOGENESIS	0.994534	1	0.173527	0.541288	6367	50	VAMP8 TPD52L1 TXNDC5 FTL SNX9 IGF2R AP3B1 AP4E1 PIK3C2A SNX2 YIPF6 SNX5	c2.cp
REACTOME_FORMATION_OF_TRANSCRIPTION_COUPLED_NER_TC_NER_REPAIR_COMPLEX	0.991121	1	0.176656	0.496993	5915	29	POLR2J POLR2H ERCC5 GTF2H2B TCEA1 POLR2L XAB2 CDK7 MNAT1 POLR2I ERCC4 GTF2H2 POLR2K	c2.cp
REACTOME_CDT1_ASSOCIATION_WITH_THE_CDC6_ORC_ORIGIN_COMPLEX	0.947888	1	0.213022	0.674285	6147	54	GMNN PSMB8 ORC1 PSMB9 RPS27A PSME1 CDC6 MCM8 PSMB1	c2.cp
REACTOME_BRANCHED_CHAIN_AMINO_ACID_CATABOLISM	0.795078	1	0.300345	0.7498	4457	17	BCAT2 HIBCH ALDH6A1 HIBADH HSD17B10 BCKDHB	c2.cp
REACTOME_ZINC_TRANSPORTERS	0.793953	1	-0.291114	-0.759705	3544	15	SLC30A3 SLC39A10 SLC39A3 SLC30A2 SLC39A4 SLC39A2	c2.cp
REACTOME_DOUBLE_STRAND_BREAK_REPAIR	0.950731	1	-0.218306	-0.619543	4032	21	TP53BP1 RAD50 TDP1 BRIP1 LIG4 MDC1 PRKDC XRCC4 RPA3 NBN RPA1 XRCC6 LIG1 RPA2 XRCC5 BRCA1 BRCA2 ATM H2AFX RAD51 RAD52	c2.cp
REACTOME_AUTODEGRADATION_OF_THE_E3_UBIQUITIN_LIGASE_COP1	0.849253	1	0.244935	0.755689	5396	47	PSMB8 PSMB9 RPS27A PSME1 TP53 PSMB1 ATM PSME2 UBA52 PSMA2 PSMD6 PSMB3 PSMD9 PSMC5 PSMB10 PSMD10 PSMA7 PSMA1 PSMA4 PSMB4 PSMD4 PSMF1 RFWD2 PSMA6 PSMB6 PSMB7 PSMA3 PSMD5 PSMD12 PSMD7 PSMC2 PSMC6 PSMD13 PSMD11 PSME4 PSMC3 PSMC1 PSMD8 PSMC4 PSMD14 PSMD3 PSMB5 PSMA5 PSMB2 PSMD2 PSMD1 PSMA8	c2.cp
REACTOME_SMOOTH_MUSCLE_CONTRACTION	0.822462	1	0.275856	0.73804	4803	23	ITGA1 CALD1 ITGB5 SORBS3 TLN1 TPM2 VCL SORBS1 MYL6	c2.cp
REACTOME_FRS2_MEDIATED_CASCADE	0.765389	1	0.278534	0.796197	4612	32	FGF23 FGF2 FGF17 FGFR4 FGF18 FGF10 CDK1 FGFR3 SOS1 RAF1 FRS2 FGFR1	c2.cp
REACTOME_DOWNSTREAM_SIGNALING_OF_ACTIVATED_FGFR	0.997664	1	0.168604	0.578801	6831	91	CDKN1A FGF23 FGF2 FOXO1 FGF17 ITPR2 FGFR4 ITPR3 GAB1 FOXO4 ADCY4 CDKN1B FGF18 SHC1 RICTOR CHUK FGF10 PIK3CA CDK1 FGFR3 SOS1 BAD PHLPP1 RAF1 FRS2 AKT1S1 FGFR1 CREB1	c2.cp
REACTOME_MYOGENESIS	0.769944	1	-0.271385	-0.801892	3155	25	MYOG CDH15 NTN3	c2.cp
REACTOME_PHOSPHOLIPASE_C_MEDIATED_CASCADE	0.951467	1	-0.20188	-0.690828	3469	47	FGF5 CAMK4 ADCY1 ADCY7 PRKCG CALM3 PRKCE FGF9 PDE1A CALM1 PRKACA ADCY6 PRKCD KL PDE1B PRKAR1A ADCY5 CALM2	c2.cp
REACTOME_ACTIVATION_OF_KAINATE_RECEPTORS_UPON_GLUTAMATE_BINDING	0.767862	1	-0.262784	-0.812809	3062	30	NCALD GRIK3 GNG13 CALM3 PLCB1 DLG3 GNG3 GRIK2 CALM1 GRIK5 GNG4 GNB5 GRIK1 GRIK4	c2.cp
REACTOME_MAPK_TARGETS_NUCLEAR_EVENTS_MEDIATED_BY_MAP_KINASES	0.966074	1	0.209995	0.59481	5808	30	FOS MAPKAPK2 ATF1 ELK1 PPP2R1B JUN RPS6KA1 PPP2CB MAPK7 RPS6KA5 CREB1	c2.cp
REACTOME_SYNTHESIS_AND_INTERCONVERSION_OF_NUCLEOTIDE_DI_AND_TRIPHOSPHATES	0.965255	1	-0.213052	-0.581743	4194	18	AK5 GSR NME1 RRM1 NME1-NME2 RRM2B GUK1 TXNRD1 TXN CTPS2 AK2 CMPK1 RRM2 NME2 GLRX NME4 AK1 DTYMK	c2.cp
REACTOME_JNK_C_JUN_KINASES_PHOSPHORYLATION_AND_ACTIVATION_MEDIATED_BY_ACTIVATED_HUMAN_TAK1	0.777139	1	0.309888	0.762736	4323	16	NOD2 TAB2 RIPK2 NOD1 MAP3K7 IRAK2	c2.cp
REACTOME_ENERGY_DEPENDENT_REGULATION_OF_MTOR_BY_LKB1_AMPK	0.97735	1	0.207553	0.518149	5479	17	CAB39L STRADB STK11 PRKAG2 PRKAB2 RHEB PRKAG3 PRKAA1 PPM1A CAB39 PRKAB1 PRKAG1 TSC1 STRADA RPTOR PRKAA2 TSC2	c2.cp
REACTOME_MITOTIC_G2_G2_M_PHASES	0.889561	1	-0.211905	-0.79753	2939	77	TUBB4A NEK2 TUBGCP5 TUBA1A PAFAH1B1 DCTN1 TUBG2 YWHAG TUBA4A PLK4 CCNA1 TUBG1 E2F1 DYNC1H1 CEP164 PKMYT1 CEP41 TUBB DCTN2 PRKACA PPP2R1A TUBGCP6 CCNB2 E2F3 CEP192	c2.cp
REACTOME_DNA_REPAIR	0.979524	1	0.19248	0.671771	6792	102	FANCC FANCE POLD1 MAD2L2 POLR2J PCNA CCNO RPS27A POLR2H FANCB ERCC5 DDB2 RAD52 FANCL GTF2H2B TCEA1 RFC4 RAD51 ALKBH2 H2AFX POLR2L ATM MUTYH UBA52 POLD4 BRCA2 POLD2 BRCA1 POLE2 XAB2 CDK7 USP1	c2.cp
REACTOME_RNA_POL_II_PRE_TRANSCRIPTION_EVENTS	0.993156	1	0.181149	0.56887	6384	52	GTF2E2 POLR2J POLR2H TAF12 TAF4 GTF2H2B TCEA1 POLR2L GTF2F2 NCBP2 GTF2B TAF5 CCNT1 GTF2A2 CDK7 MNAT1 SUPT4H1 CDK9 POLR2I GTF2H2 POLR2K NCBP1 ELL TAF10 SSRP1 CTDP1 GTF2A1 POLR2G POLR2F GTF2E1 TAF11 SUPT5H TAF13 GTF2F1 CCNT2 CCNH TAF6 POLR2D TAF9 TBP POLR2C GTF2H3 POLR2B TAF1 ERCC2 ERCC3 POLR2E SUPT16H GTF2H1	c2.cp
REACTOME_POST_TRANSLATIONAL_PROTEIN_MODIFICATION	1	1	-0.147495	-0.628728	2459	173	GALNT5 MUC5AC ST8SIA2 F7 MUC6 WBSCR17 MUC5B GCNT4 STS B3GNTL1 ARSF GALNT12 GCNT1 EIF5A2 GALNT13 GALNT9 DOLK GALNTL6 GALNT11 PMM2 ST3GAL3 TUSC3 ALG12 PIGS ARSB ARSG FUT8 MGAT5 MGAT4B ST8SIA3 B4GALT6 GALNT14 MGAT3 DOHH SUMF2 B4GALT5 PIGO PIGW GPAA1 ALG1	c2.cp
REACTOME_METABOLISM_OF_LIPIDS_AND_LIPOPROTEINS	0.999884	1	0.167682	0.680618	8638	443	PLA2G2A ANGPTL4 PLBD1 TEAD2 YAP1 WWTR1 ACADL G0S2 ABCA1 TEAD4 CYP39A1 PLIN2 ACSL5 CH25H PIK3R5 PLTP TEAD3 ACER1 CAV1 LPIN3 CTGF ELOVL7 LPL HSD17B7 ACOX2 PPARA PLIN1 SLCO1B1 SPHK1 SLC44A3 LPCAT2 HSD3B7 FABP4 TEAD1 MTM1 CUBN CHPT1 HSD17B1 PPP1CC SMPD2 LRAT PIK3CG ABHD5 INPPL1 SLC25A1 HSPG2 LBR DECR1 SLC25A20 HADHB MBOAT1 LCAT AGT RXRA TBL1X SLC44A4 APOA1 SGMS1 BMP1 ACACB CYP21A2 GPAM APOB PI4K2B AG…	c2.cp
REACTOME_SIGNAL_TRANSDUCTION_BY_L1	0.955858	1	0.216936	0.627899	5824	34	ITGA5 EGFR ITGB1 ITGAV	c2.cp
REACTOME_TRANSPORT_OF_VITAMINS_NUCLEOSIDES_AND_RELATED_MOLECULES	0.95884	1	-0.208826	-0.640535	3866	29	AVP ALB SLC27A4 SLC29A1 SLCO2A1 SLC29A2 SLC35B4 SLC35A2 SLC28A2 SLC35C1 SLCO4C1 SLCO1A2	c2.cp
REACTOME_RESPIRATORY_ELECTRON_TRANSPORT	0.846658	1	0.238332	0.77502	5559	64	UQCRHL SDHD COX5B NDUFB4 NDUFB1 ETFA UQCR11 ETFDH NDUFS8 UQCRB NDUFS6 NDUFV2 COX7C NDUFA11 NDUFB10 NDUFC1 COX6C NDUFS7 NDUFA8 UQCRQ NDUFB8 NDUFA13 NDUFB7 NDUFS5 NDUFA3 NDUFA1 NDUFB9 NDUFA12 COX6B1 COX4I1 COX6A1 NDUFA2 NDUFA6 NDUFS3 SDHB ETFB COX7B NDUFB3 NDUFB6 SDHA CYCS UQCRFS1 NDUFA7 NDUFS2 NDUFB2 NDUFV3 UQCRH NDUFAB1 COX7A2L COX8A NDUFB5 NDUFC2 NDUFS4 NDUFA4 NDUFA10 UQCRC2 SDHC UQCRC1 CYC1 NDU…	c2.cp
REACTOME_ASPARAGINE_N_LINKED_GLYCOSYLATION	1	1	0.11943	0.401165	6730	80	B4GALT1 B4GALT4 ST8SIA6 DAD1 LMAN1 GFPT2 DPM3 ALG10B MGAT1 RPN2 MAN1A1 STT3A ST6GAL1 DPM1 ALG2 MAN2A1 PGM3 RPN1 MAN1C1 SEC13 SEC24B MGAT4A MANEA ALG8 DPAGT1 ALG6 EDEM3 PDIA3	c2.cp
REACTOME_ASSEMBLY_OF_THE_PRE_REPLICATIVE_COMPLEX	0.983689	1	0.189383	0.614559	6452	63	GMNN PSMB8 ORC1 PSMB9 RPS27A PSME1 MCM5 CDC6 MCM7 MCM8 PSMB1	c2.cp
REACTOME_BIOSYNTHESIS_OF_THE_N_GLYCAN_PRECURSOR_DOLICHOL_LIPID_LINKED_OLIGOSACCHARIDE_LLO_AND_TRANSFER_TO_A_NASCENT_PROTEIN	0.987208	1	0.185905	0.518268	5864	28	GFPT2 DPM3 ALG10B DPM1 ALG2 PGM3 ALG8 DPAGT1 ALG6 ALG5 DPM2 ALG3 ALG9 GMPPA GNPNAT1 PMM1 DOLPP1 ALG13 ALG11 ALG10 ALG14 GMPPB MPI RFT1 ALG1 ALG12 PMM2 DOLK	c2.cp
REACTOME_GLOBAL_GENOMIC_NER_GG_NER	0.984991	1	0.191865	0.552361	5971	33	POLD1 PCNA ERCC5 DDB2 GTF2H2B RFC4 POLD4 POLD2 POLE2 CDK7 MNAT1	c2.cp
REACTOME_RAP1_SIGNALLING	0.905003	1	0.262627	0.636573	5010	15	SIPA1 RAP1A PRKG1 RAP1B RAPGEF3	c2.cp
REACTOME_SYNTHESIS_SECRETION_AND_INACTIVATION_OF_GLP1	0.817245	1	-0.28349	-0.739809	3648	15	PCSK1 DPP4 GNG13	c2.cp
REACTOME_GABA_B_RECEPTOR_ACTIVATION	0.935943	1	0.227011	0.6682	5785	37	GNG12 GNG5 KCNJ15 KCNJ10 KCNJ2 GNG8 GNAI3 GNG10 KCNJ16 ADCY4 GNGT2	c2.cp
REACTOME_DESTABILIZATION_OF_MRNA_BY_KSRP	0.769738	1	-0.291761	-0.786454	3382	17	YWHAZ PARN EXOSC5 EXOSC2 EXOSC3 MAPK11 EXOSC1 AKT1 EXOSC9 KHSRP EXOSC6 EXOSC7 DCP2 MAPK14 DIS3 EXOSC4 EXOSC8	c2.cp
REACTOME_TRANSPORT_TO_THE_GOLGI_AND_SUBSEQUENT_MODIFICATION	0.993073	1	0.178367	0.5135	6020	33	B4GALT1 B4GALT4 ST8SIA6 LMAN1 MGAT1 MAN1A1 ST6GAL1 MAN2A1 MAN1C1 SEC13 SEC24B MGAT4A MANEA	c2.cp
REACTOME_N_GLYCAN_ANTENNAE_ELONGATION_IN_THE_MEDIAL_TRANS_GOLGI	0.891973	1	0.260328	0.658953	5044	18	B4GALT1 B4GALT4 ST8SIA6	c2.cp
REACTOME_TRANSFERRIN_ENDOCYTOSIS_AND_RECYCLING	0.944256	1	-0.218543	-0.640009	3895	24	ATP6V1A ATP6V0D1 ATP6V1G2 TF ATP6V1B2 MCOLN1 ATP6V1C1 ATP6V1E1 ATP6V1D ATP6V0C	c2.cp
REACTOME_FORMATION_OF_INCISION_COMPLEX_IN_GG_NER	0.964168	1	-0.206394	-0.585738	4089	21	GTF2H4 DDB1 GTF2H1 ERCC3 ERCC2 GTF2H3 CCNH RAD23B RPA3 ERCC1 RPA1 XPC XPA RPA2 GTF2H2 ERCC4 MNAT1 CDK7 GTF2H2B DDB2 ERCC5	c2.cp
REACTOME_ENDOSOMAL_SORTING_COMPLEX_REQUIRED_FOR_TRANSPORT_ESCRT	0.996281	1	0.167154	0.459901	5892	26	CHMP4C RPS27A VPS37D CHMP4A UBA52 CHMP2A TSG101 STAM2 VPS37B	c2.cp
REACTOME_PKB_MEDIATED_EVENTS	0.971049	1	0.207654	0.578899	5768	28	EIF4EBP1 RPS6 CAB39L STRADB EEF2K RPS6KB1 STK11 PRKAG2 PRKAB2 RHEB EIF4B PDE3B PRKAG3 PRKAA1 PPM1A EIF4G1 CAB39 MLST8 PRKAB1 AKT2 PRKAG1 EIF4E TSC1 STRADA RPTOR PRKAA2 MTOR TSC2	c2.cp
REACTOME_SIGNALING_BY_INSULIN_RECEPTOR	0.956918	1	0.203132	0.706146	6618	99	FGF23 FGF2 EIF4EBP1 TCIRG1 DOK1 ATP6V0E1 FGF17 FGFR4 RPS6 GAB1 TLR9 CAB39L FGF18 SHC1 FGF10 PIK3CA CDK1 ATP6V1G1 IRS2 STRADB INSR FGFR3 SOS1 RAF1 FRS2 IRS1 FGFR1 ATP6V0A4	c2.cp
REACTOME_PURINE_METABOLISM	0.793098	1	0.272156	0.777966	4779	32	GMPR PNP CAT NT5C1B ADA GPX1 NT5E PPAT	c2.cp
REACTOME_RNA_POL_III_TRANSCRIPTION_INITIATION_FROM_TYPE_3_PROMOTER	0.985075	1	-0.186332	-0.555757	4025	26	LZTS1 POLR3A POLR3C POLR3B POLR3K SNAPC4 POLR2E POLR3F POLR3D TBP SNAPC2 SNAPC5 POLR3E SNAPC3 POLR2F BRF2 POU2F1 POLR3H POLR2K POLR1C POLR1D SNAPC1 POLR2L POLR3GL POLR2H ZNF143	c2.cp
REACTOME_NEP_NS2_INTERACTS_WITH_THE_CELLULAR_EXPORT_MACHINERY	0.922926	1	-0.227781	-0.679384	3771	26	NUP93 NUP210 POM121 NUP155 SEH1L	c2.cp
REACTOME_HIV_INFECTION	0.952731	1	0.20164	0.758074	7255	187	CXCR4 CCR5 LCK HCK CD4 CD28 DOCK2 RCC1 B2M APOBEC3G PSMB8 PSMB9 GTF2E2 POLR2J RPS27A BANF1 PSME1 POLR2H XPO1 PAK2 TAF12 NUP37 TAF4 GTF2H2B TCEA1	c2.cp
REACTOME_TRANSPORT_OF_RIBONUCLEOPROTEINS_INTO_THE_HOST_NUCLEUS	0.818449	1	-0.259584	-0.774239	3344	26	NUP93 NUP210 POM121 NUP155 SEH1L	c2.cp
REACTOME_HIV_LIFE_CYCLE	0.952736	1	0.204065	0.717518	6651	107	CXCR4 CCR5 CD4 RCC1 GTF2E2 POLR2J RPS27A BANF1 POLR2H XPO1 TAF12 NUP37 TAF4 GTF2H2B TCEA1 POLR2L GTF2F2 VPS37D NUP205 UBA52 NCBP2 GTF2B RANBP2 TAF5 CCNT1 TSG101 GTF2A2 CDK7 VPS37B RAE1 NUP188 MNAT1	c2.cp
REACTOME_ABORTIVE_ELONGATION_OF_HIV1_TRANSCRIPT_IN_THE_ABSENCE_OF_TAT	0.959384	1	0.218715	0.561213	5479	19	POLR2J POLR2H POLR2L GTF2F2 NCBP2 SUPT4H1 POLR2I POLR2K NCBP1	c2.cp
REACTOME_HOST_INTERACTIONS_OF_HIV_FACTORS	0.969532	1	0.196726	0.702145	6936	119	LCK HCK CD4 CD28 DOCK2 RCC1 B2M APOBEC3G PSMB8 PSMB9 RPS27A BANF1 PSME1 XPO1 PAK2 NUP37	c2.cp
REACTOME_RNA_POL_III_TRANSCRIPTION_TERMINATION	0.967599	1	-0.203745	-0.563861	4150	19	LZTS1 POLR3A POLR3C POLR3B POLR3K POLR2E POLR3F POLR3D	c2.cp
REACTOME_RESPIRATORY_ELECTRON_TRANSPORT_ATP_SYNTHESIS_BY_CHEMIOSMOTIC_COUPLING_AND_HEAT_PRODUCTION_BY_UNCOUPLING_PROTEINS_	0.901005	1	-0.2099	-0.792568	2957	79	ATP5B NDUFS1 ATP5G1 NDUFA9 ATP5A1 COX5A NDUFV1 NDUFA5 CYC1 ATP5F1 UQCRC1 SDHC UQCRC2 NDUFA10 NDUFA4 NDUFS4 NDUFC2 NDUFB5 COX8A COX7A2L NDUFAB1 UQCRH NDUFV3 NDUFB2 NDUFS2 ATP5C1 NDUFA7 UQCRFS1 CYCS SDHA NDUFB6 NDUFB3 COX7B ATP5H ATP5J2 ATP5L ETFB SDHB NDUFS3 ATP5J NDUFA6 NDUFA2 COX6A1 COX4I1 COX6B1 NDUFA12 NDUFB9 NDUFA1 ATP5O NDUFA3 NDUFS5 NDUFB7 NDUFA13 NDUFB8 ATP5D UQCRQ NDUFA8 NDUFS7 COX6C NDUF…	c2.cp
REACTOME_FORMATION_OF_THE_HIV1_EARLY_ELONGATION_COMPLEX	0.991121	1	0.176656	0.496993	5915	29	POLR2J POLR2H GTF2H2B POLR2L GTF2F2 NCBP2 CDK7 MNAT1 SUPT4H1 POLR2I GTF2H2 POLR2K NCBP1 CTDP1 POLR2G POLR2F SUPT5H GTF2F1 CCNH POLR2D POLR2C GTF2H3 POLR2B ERCC2 ERCC3 POLR2E GTF2H1	c2.cp
REACTOME_LATE_PHASE_OF_HIV_LIFE_CYCLE	0.999563	1	0.15313	0.527915	6867	93	RCC1 GTF2E2 POLR2J RPS27A POLR2H XPO1 TAF12 NUP37 TAF4 GTF2H2B TCEA1 POLR2L GTF2F2 VPS37D NUP205 UBA52 NCBP2 GTF2B RANBP2 TAF5 CCNT1 TSG101 GTF2A2 CDK7 VPS37B RAE1 NUP188 MNAT1	c2.cp
REACTOME_SHC_MEDIATED_SIGNALLING	0.946697	1	-0.228076	-0.595197	4226	15	MAP2K1 YWHAB MAPK1 KRAS SHC3 NRAS GRB2 MAP2K2 MAPK3 HRAS SHC2 RAF1 SOS1 CDK1 SHC1	c2.cp
REACTOME_INTERACTIONS_OF_VPR_WITH_HOST_CELLULAR_PROTEINS	0.957121	1	-0.209851	-0.654457	3816	31	NUP93 NUP210 POM121 NUP155 HMGA1 SEH1L SLC25A5	c2.cp
REACTOME_APC_C_CDH1_MEDIATED_DEGRADATION_OF_CDC20_AND_OTHER_APC_C_CDH1_TARGETED_PROTEINS_IN_LATE_MITOSIS_EARLY_G1	0.813309	1	0.24512	0.797094	5340	64	UBE2C AURKB PSMB8 PSMB9 CDC26 PTTG1 RPS27A PSME1 PSMB1 ANAPC11 CDC16 PSME2 SKP2 UBA52 PSMA2 PLK1 PSMD6	c2.cp
REACTOME_APC_C_CDC20_MEDIATED_DEGRADATION_OF_MITOTIC_PROTEINS	0.814747	1	0.245131	0.798058	5347	65	UBE2C PSMB8 PSMB9 CDC26 PTTG1 RPS27A PSME1 PSMB1 ANAPC11 CDK1 CDC16 BUB3 PSME2 UBA52 PSMA2 PSMD6 PSMB3 PSMD9 ANAPC4 UBE2E1 PSMC5 PSMB10 ANAPC10 PSMD10 PSMA7 BUB1B PSMA1 PSMA4 PSMB4 PSMD4 CDC23 PSMF1 PSMA6 PSMB6 PSMB7 PSMA3 UBE2D1 PSMD5 PSMD12 PSMD7 PSMC2 PSMC6 PSMD13 PSMD11 PSME4 PSMC3 PSMC1 MAD2L1 CCNB1 PSMD8 CDC27 PSMC4 PSMD14 PSMD3 CDC20 PSMB5 PSMA5 ANAPC5 PSMB2 ANAPC7 ANAPC2 PSMD2 ANAPC1 PSMD…	c2.cp
REACTOME_AUTODEGRADATION_OF_CDH1_BY_CDH1_APC_C	0.789046	1	0.253104	0.806355	5142	56	UBE2C PSMB8 PSMB9 CDC26 RPS27A PSME1 PSMB1 ANAPC11 CDC16 PSME2 UBA52 PSMA2 PSMD6 PSMB3 PSMD9 ANAPC4 UBE2E1 PSMC5 PSMB10 ANAPC10 PSMD10 PSMA7 PSMA1 PSMA4 PSMB4 PSMD4 CDC23 PSMF1 PSMA6 PSMB6 PSMB7 PSMA3 UBE2D1 PSMD5 PSMD12 PSMD7 PSMC2 PSMC6 PSMD13 PSMD11 PSMC3 PSMC1 PSMD8 CDC27 PSMC4 PSMD14 PSMD3 PSMB5 PSMA5 ANAPC5 PSMB2 ANAPC7 ANAPC2 PSMD2 ANAPC1 PSMD1	c2.cp
REACTOME_MITOTIC_PROMETAPHASE	0.902745	1	0.222609	0.745028	6051	78	CENPA AURKB PPP1CC RPS27 STAG2 STAG1 MAPRE1 PPP2R1B XPO1 BIRC5 AHCTF1 NUP37 NSL1 RCC2 PMF1 KIF18A CENPQ B9D2 SMC3 BUB3 NUDC RAD21 KIF2C PPP2CB PPP2R5A RANBP2 PLK1 CENPM CENPK	c2.cp
REACTOME_SCF_BETA_TRCP_MEDIATED_DEGRADATION_OF_EMI1	0.965647	1	0.205409	0.637714	6155	49	PSMB8 FBXO5 PSMB9 RPS27A PSME1 PSMB1 PSME2 UBA52 PSMA2 PSMD6 PSMB3 PSMD9 PSMC5 PSMB10 PSMD10 PSMA7 CUL1 PSMA1 PSMA4 PSMB4 PSMD4 PSMF1 PSMA6 PSMB6 PSMB7 PSMA3 PSMD5 PSMD12 PSMD7 PSMC2 PSMC6 PSMD13 PSMD11 PSME4 SKP1 PSMC3 PSMC1 PSMD8 PSMC4 PSMD14 PSMD3 CDC20 PSMB5 PSMA5 PSMB2 PSMD2 PSMD1 PSMA8	c2.cp
REACTOME_PHOSPHORYLATION_OF_THE_APC_C	0.781523	1	0.305799	0.763416	4381	17	UBE2C CDC26 ANAPC11 CDK1 CDC16 PLK1	c2.cp
REACTOME_GLUCOSE_METABOLISM	0.98733	1	0.186126	0.602503	6467	62	PCK1 PYGL PGAM2 ALDOB GYS2 PGM2 SLC25A1 FBP1 PPP2R1B PHKA1 PHKG1 PFKFB3 PYGM	c2.cp
REACTOME_RNA_POL_III_CHAIN_ELONGATION	0.844369	1	-0.268642	-0.724136	3710	17	LZTS1 POLR3A POLR3C POLR3B POLR3K POLR2E POLR3F POLR3D	c2.cp
REACTOME_ANTIGEN_PROCESSING_UBIQUITINATION_PROTEASOME_DEGRADATION	1	1	0.0955297	0.360507	7634	194	SOCS3 UBE2C TRIM63 DTX3L RNF144B PSMB8 LRR1 RNF182 TRIM21 PSMB9 FBXO2 SOCS1 CDC26 RPS27A PSME1 ASB9 FBXO17 ASB4 SMURF2 PSMB1 ANAPC11 RNF138 ASB3 SPSB1	c2.cp
REACTOME_APC_CDC20_MEDIATED_DEGRADATION_OF_NEK2A	0.906424	1	0.249903	0.654819	5220	21	UBE2C CDC26 RPS27A ANAPC11 CDC16 BUB3 UBA52	c2.cp
REACTOME_EXTENSION_OF_TELOMERES	0.809066	1	0.275382	0.762601	4800	27	DNA2 POLD1 PCNA POLA1 RFC4 PRIM2 POLD4 POLD2 POLE2 DKC1 WRAP53 RUVBL1 POLD3 POLA2	c2.cp
REACTOME_VIF_MEDIATED_DEGRADATION_OF_APOBEC3G	0.849253	1	0.244935	0.755689	5396	47	APOBEC3G PSMB8 PSMB9 RPS27A PSME1 PSMB1 PSME2 UBA52 PSMA2 PSMD6 PSMB3 PSMD9 PSMC5 PSMB10 PSMD10 PSMA7 PSMA1 PSMA4 PSMB4 RBX1 PSMD4 PSMF1 PSMA6 PSMB6 PSMB7 PSMA3 PSMD5 PSMD12 PSMD7 PSMC2 PSMC6 PSMD13 PSMD11 PSME4 PSMC3 PSMC1 CUL5 PSMD8 PSMC4 PSMD14 PSMD3 PSMB5 PSMA5 PSMB2 PSMD2 PSMD1 PSMA8	c2.cp
REACTOME_SIGNALING_BY_FGFR	0.998846	1	0.160433	0.559925	6926	102	CDKN1A FGF23 FGF2 FOXO1 FGF17 ITPR2 FGFR4 ITPR3 GAB1 FOXO4 RPS27A ADCY4 CDKN1B FGF18 SHC1 RICTOR CHUK FGF10 PIK3CA CDK1 FGFR3 SOS1 BAD PPP2CB PHLPP1 RAF1 IL17RD FRS2 UBA52 AKT1S1 FGFR1 CREB1	c2.cp
REACTOME_SYNTHESIS_OF_GLYCOSYLPHOSPHATIDYLINOSITOL_GPI	0.914036	1	0.250764	0.626023	5124	17	PIGA PIGV PIGF PIGC PIGH PIGP PIGB	c2.cp
REACTOME_RNA_POL_I_TRANSCRIPTION_INITIATION	0.997447	1	0.159477	0.431369	5860	24	KAT2B POLR2H GTF2H2B RRN3 CDK7 POLR1D MNAT1 TAF1B POLR1C TAF1A GTF2H2 POLR2K	c2.cp
REACTOME_PYRIMIDINE_METABOLISM	0.900379	1	0.25151	0.666599	5223	22	CDA DPYD TYMP TK1 UPP2 NT5E UPB1	c2.cp
REACTOME_SHC_RELATED_EVENTS	0.949076	1	-0.228086	-0.606231	4211	16	MAP2K1 YWHAB MAPK1 KRAS SHC3 NRAS GRB2 MAP2K2 MAPK3 HRAS SHC2 RAF1 SOS1 INSR CDK1 SHC1	c2.cp

## Sheet: FGSEA HD+ BA9 v C BA9 (2)
pathway	pval	padj	ES	NES	nMoreExtreme	size	leadingEdge	type
KEGG_RIBOSOME	0.000126711	0.00511999	0.62889	1.98457	0	86	RPL36AL RPS21 RPS4X RPS16 RPS27 RPL36A RPL22L1 RPS19 RPS11 RPS15 RPL37A RPL36 RPL38 RPS28 RPL9 RPS20 RPS12 RPL39 RPLP2 RPS17 RPS24 RPL30 RPL41 RPL18 RPL31 RPL35 RPL32 RPS7 RPL28 RPL19 RPS27A RPL18A RPL12 RPL11 RPL23A RPL23 RPLP1 RPS5 RPS25 RPL37 RPS10 FAU RPS13 RPS3 RPL10 RPS6 RPL26 RPL14 RPS23 RPL13A RPS15A RPS8 RPL6 RPL8 RPL27 RPL4 RPL7 RPS2 RPL17 RPS9 RPS18 RPL3 RPL29 RPL27A RPLP0 RPL13 RPL7A …	c2.cp
KEGG_CYTOKINE_CYTOKINE_RECEPTOR_INTERACTION	0.000111557	0.00511999	0.503472	1.75557	0	230	TNFRSF6B PPBP CCL3 CCL4 IL1B CCL20 CCL2 CXCL10 TNFRSF12A LIF CSF3 OSM NGFR IL1R2 CCL4L2 GDF5 IL20 CCL26 TNFSF9 IFNK CXCR4 CXCR3 TNFRSF1B PF4 CCR2 CXCL3 PRL CD70 LTA IL18R1 CCL1 CXCL2 CSF2RA EDAR CXCR6 EPO CXCL16 TGFB1 IL4R IL6 CCR7 IL18RAP TNFRSF17 IFNA10 TNFRSF10C CXCL13 CCL3L1 CCL3L3 TNFRSF10A IL10 CLCF1 IL5RA CCR5 IL10RA IL15RA RELT FLT1 CXCL1 CSF3R TNFRSF8 CSF1 CCR1 TNF IL1R1 IL1A LTBR TNFRSF…	c2.cp
KEGG_LEISHMANIA_INFECTION	0.00013132	0.00511999	0.679278	2.07845	0	68	IL1B FOS FCGR1A FCGR2A PTPN6 JUN FCGR3A PTGS2 TLR2 HLA-DRA ITGB2 NCF2 HLA-DRB5 TGFB1 ITGAM NFKBIA HLA-DQA1 IL10 C3 CYBA HLA-DRB1 HLA-DQB1 HLA-DPA1 TNF HLA-DQA2 NCF1 IL1A NCF4 MYD88 HLA-DPB1 HLA-DOA HLA-DOB RELA TGFB3 HLA-DMA MAPK13 MARCKSL1 FCGR3B	c2.cp
KEGG_SYSTEMIC_LUPUS_ERYTHEMATOSUS	0.000122175	0.00511999	0.704725	2.29139	0	111	HIST2H2AA3 HIST1H3H HIST1H2AI HIST1H4B HIST2H2AA4 CD80 CD86 FCGR1A HIST1H3B HIST1H2BG HIST1H2AE HIST1H4D HIST2H2AC FCGR2A HIST2H4A HIST1H4A HIST1H2BE HIST1H4E C1QA HIST2H2BE C1QB HIST1H2BH HIST2H2BF HIST1H2BF HIST1H2BC FCGR3A HIST1H2AB HLA-DRA HIST1H2BD HIST1H2AD C4B HLA-DRB5 HIST1H3A H2BFWT C1QC HIST1H4I HIST1H2BJ HLA-DQA1 HIST1H2BL HIST2H2AB HIST1H2AK IL10 HIST1H3D C4A C3 H2AFJ HIST1H2AG HLA-DR…	c2.cp
PID_SMAD2_3NUCLEAR_PATHWAY	0.000127894	0.00511999	0.589332	1.84502	0	81	IGHA1 SERPINE1 ATF3 GSC FOS NKX2-5 CDKN1A JUN RUNX3 MYC MYOD1 RUNX1 CEBPB IRF7 VDR TGIF1 IL10 CDK2	c2.cp
PID_FRA_PATHWAY	0.000142086	0.00511999	0.757977	2.07573	0	35	CCL2 LIF JUNB FOSL1 HMOX1 PLAUR JUN NOS3 NFATC1 IL6 ITGB4 FOSL2 JUND MMP9 CDKN2A THBD NFATC3 MMP1 NFATC2	c2.cp
PID_P53_DOWNSTREAM_PATHWAY	0.000119175	0.00511999	0.553259	1.83557	0	134	POU4F2 SFN SERPINE1 ATF3 SPP1 BCL2A1 LIF EDN2 POU4F1 CDKN1A JUN DUSP1 DUSP5 FOXA1 BTG2 DDIT4 TNFRSF10C GADD45A VDR TNFRSF10A DKK1 GDF15 BDKRB2 PLK3 TNFRSF10B HIC1 SERPINB5 S100A2 NDRG1 TP53I3 TAP1 TNFRSF10D MCL1 SNAI2 ARID3A EPHA2 CD82 IRF5 TGFA GPX1 CASP1 MAP4K4 BCL6 CASP6 BAK1 DDB2 FAS PYCARD BBC3	c2.cp
PID_AP1_PATHWAY	0.000131614	0.00511999	0.667381	2.02946	0	65	FOSB ATF3 DMP1 CCL2 FOS CYR61 FABP4 JUNB FOSL1 EGR1 JUN DUSP1 ACTA1 MYC NFATC1 TGFB1 IL6 MT2A IL10 TIMP1 FOSL2 JUND MMP9 CDKN2A ETS1 NFATC3 MMP1 NFATC2 AGT TRIP6 ELF1 IL5 PLAU	c2.cp
REACTOME_MEIOSIS	0.00012444	0.00511999	0.649994	2.07993	0	97	HIST2H2AA3 HIST1H3H HIST1H4B HIST2H2AA4 HIST1H3B HIST1H2BG HIST1H2AE HIST1H4D HIST2H2AC H3F3AP6 HIST2H4A HIST1H4A LMNA HIST1H2BE HIST1H4E HIST2H2BE HIST1H2BH HIST1H2BF HIST1H2BC HIST1H2AB HIST1H2BD HIST1H2AD HSPA2 HIST1H3A HIST1H4I HIST1H2BJ HIST1H2BL HIST1H3D CDK2 HIST2H3C HIST2H3A HIST1H2BK FKBP6 HIST1H2AC H3F3B SUN2 HIST1H4H HIST1H3C	c2.cp
REACTOME_SRP_DEPENDENT_COTRANSLATIONAL_PROTEIN_TARGETING_TO_MEMBRANE	0.000120598	0.00511999	0.532562	1.75227	0	125	SRP9P1 RPL23AP74 RPL34P27 RPL10P9 RPL21P75 RPL23AP2 RPS28P7 RPL26P30 RPL7AP66 RPL17P36 RPS21 RPS4X RPL23AP42 RPS16 RPS27 RPL36A RPS19 RPS11 RPS15 RPL37A RPL36 RPL38 RPS28 RPL9 RPS20 RPS12 RPL39 RPLP2 RPS17 RPS24 RPL30 RPL41 RPL18 RPL31 RPL35 RPL32 RPS7 RPL21P16 RPL28 RPL19 RPS27A RPL18A RPL12 RPL11 RPL23A RPL23 RPLP1 RPS5 RPS25 RPL37 RPS10 FAU RPS13 RPS3 RPL10 RPS6 RPL26 RPL14 RPS23 RPL13A RPS15A…	c2.cp
REACTOME_CELL_SURFACE_INTERACTIONS_AT_THE_VASCULAR_WALL	0.000127324	0.00511999	0.560063	1.75965	0	83	TREM1 OLR1 SLC16A3 MAG ITGB3 FCER1G PF4 PTPN6 ITGAX ITGB2 PECAM1 ITGA5 ANGPT2 ITGAM DOK2 F11R SELL THBD COL1A1 MMP1 PPIAP22 SLC7A7 LYN CD48 JAM3 SLC7A9 GRB7 LCK ITGAL MERTK	c2.cp
REACTOME_RESPONSE_TO_ELEVATED_PLATELET_CYTOSOLIC_CA2_	0.000128287	0.00511999	0.553421	1.7251	0	78	PPBP SERPINE1 SERPINA1 ITGB3 THBS1 TF PF4 SRGN PLEK PECAM1 TGFB1 FGB TIMP1 CD9 PPIAP22 HSPA5 VEGFA TGFB3 TLN1 CFD CD63 VWF STX4	c2.cp
REACTOME_RNA_POL_I_TRANSCRIPTION	0.000129955	0.00511999	0.701621	2.16744	0	73	HIST2H2AA3 HIST1H3H HIST1H4B HIST2H2AA4 HIST1H3B HIST1H2BG HIST1H2AE HIST1H4D HIST2H2AC H3F3AP6 HIST2H4A HIST1H4A HIST1H2BE HIST1H4E HIST2H2BE HIST1H2BH HIST1H2BF HIST1H2BC HIST1H2AB HIST1H2BD HIST1H2AD HIST1H3A HIST1H4I HIST1H2BJ HIST1H2BL HIST1H3D HIST2H3C HIST2H3A HIST1H2BK HIST1H2AC H3F3B HIST1H4H HIST1H3C	c2.cp
REACTOME_PEPTIDE_CHAIN_ELONGATION	0.000123946	0.00511999	0.581595	1.86997	0	102	RPL23AP74 RPL34P27 RPL10P9 RPL21P75 RPL23AP2 RPS28P7 RPL26P30 RPL7AP66 RPL17P36 RPS21 RPS4X RPL23AP42 RPS16 RPS27 RPL36A RPS19 RPS11 RPS15 RPL37A RPL36 RPL38 RPS28 RPL9 RPS20 RPS12 RPL39 RPLP2 RPS17 RPS24 RPL30 RPL41 RPL18 RPL31 RPL35 RPL32 RPS7 RPL21P16 RPL28 RPL19 RPS27A RPL18A RPL12 RPL11 RPL23A RPL23 RPLP1 RPS5 RPS25 RPL37 RPS10 FAU RPS13 RPS3 RPL10 RPS6 RPL26 RPL14 RPS23 RPL13A RPS15A RPS8 R…	c2.cp
REACTOME_3_UTR_MEDIATED_TRANSLATIONAL_REGULATION	0.000120875	0.00511999	0.524146	1.72203	0	123	RPL23AP74 RPL34P27 RPL10P9 RPL21P75 RPL23AP2 RPS28P7 RPL26P30 RPL7AP66 RPL17P36 RPS21 RPS4X RPL23AP42 RPS16 RPS27 RPL36A RPS19 RPS11 RPS15 RPL37A RPL36 RPL38 RPS28 RPL9 RPS20 RPS12 RPL39 RPLP2 RPS17 RPS24 RPL30 RPL41 RPL18 RPL31 RPL35 RPL32 RPS7 RPL21P16 RPL28 RPL19 RPS27A RPL18A RPL12 RPL11 RPL23A RPL23 RPLP1 RPS5 RPS25 EIF3G RPL37 RPS10 FAU EIF4A1 RPS13 RPS3 RPL10 RPS6 RPL26 RPL14 RPS23 RPL13A …	c2.cp
REACTOME_TRANSCRIPTION	0.000114863	0.00511999	0.503467	1.72154	0	183	HIST2H2AA3 HIST1H3H HIST1H4B HIST2H2AA4 HIST1H3B HIST1H2BG HIST1H2AE HIST1H4D HIST2H2AC H3F3AP6 HIST2H4A HIST1H4A HIST1H2BE HIST1H4E HIST2H2BE HIST1H2BH HIST1H2BF HIST1H2BC HIST1H2AB HIST1H2BD HIST1H2AD HIST1H3A HIST1H4I HIST1H2BJ HIST1H2BL HIST1H3D HIST2H3C HIST2H3A HIST1H2BK HIST1H2AC H3F3B	c2.cp
REACTOME_RNA_POL_I_RNA_POL_III_AND_MITOCHONDRIAL_TRANSCRIPTION	0.000123274	0.00511999	0.628268	2.02782	0	105	HIST2H2AA3 HIST1H3H HIST1H4B HIST2H2AA4 HIST1H3B HIST1H2BG HIST1H2AE HIST1H4D HIST2H2AC H3F3AP6 HIST2H4A HIST1H4A HIST1H2BE HIST1H4E HIST2H2BE HIST1H2BH HIST1H2BF HIST1H2BC HIST1H2AB HIST1H2BD HIST1H2AD HIST1H3A HIST1H4I HIST1H2BJ HIST1H2BL HIST1H3D HIST2H3C HIST2H3A HIST1H2BK HIST1H2AC H3F3B HIST1H4H HIST1H3C	c2.cp
REACTOME_CHROMOSOME_MAINTENANCE	0.000122594	0.00511999	0.58003	1.87909	0	108	HIST2H2AA3 HIST1H4B HIST2H2AA4 HIST1H2BG HIST1H2AE HIST1H4D HIST2H2AC HIST2H4A HIST1H4A LMNA HIST1H2BE HIST1H4E HIST2H2BE HIST1H2BH RBBP4P1 HIST1H2BF HIST1H2BC HIST1H2AB HIST1H2BD HIST1H2AD HSPA2 HIST1H4I HIST1H2BJ HIST1H2BL HIST1H2BK FKBP6 HIST1H2AC CENPA SUN2 HIST1H4H	c2.cp
REACTOME_DEPOSITION_OF_NEW_CENPA_CONTAINING_NUCLEOSOMES_AT_THE_CENTROMERE	0.000135999	0.00511999	0.735539	2.15664	0	52	HIST2H2AA3 HIST1H4B HIST2H2AA4 HIST1H2BG HIST1H2AE HIST1H4D HIST2H2AC HIST2H4A HIST1H4A HIST1H2BE HIST1H4E HIST2H2BE HIST1H2BH RBBP4P1 HIST1H2BF HIST1H2BC HIST1H2AB HIST1H2BD HIST1H2AD HIST1H4I HIST1H2BJ HIST1H2BL HIST1H2BK HIST1H2AC CENPA	c2.cp
REACTOME_RNA_POL_I_PROMOTER_OPENING	0.000137306	0.00511999	0.774822	2.24489	0	48	HIST2H2AA3 HIST1H3H HIST1H4B HIST2H2AA4 HIST1H3B HIST1H2BG HIST1H2AE HIST1H4D HIST2H2AC H3F3AP6 HIST2H4A HIST1H4A HIST1H2BE HIST1H4E HIST2H2BE HIST1H2BH HIST1H2BF HIST1H2BC HIST1H2AB HIST1H2BD HIST1H2AD HIST1H3A HIST1H4I HIST1H2BJ HIST1H2BL HIST1H3D HIST2H3C HIST2H3A HIST1H2BK HIST1H2AC H3F3B HIST1H4H HIST1H3C	c2.cp
REACTOME_INTERFERON_GAMMA_SIGNALING	0.000133351	0.00511999	0.636121	1.90587	0	59	SOCS3 FCGR1A PTPN6 SOCS1 CD44 ICAM1 HLA-DRB5 GBP2 FCGR1B HLA-C IRF7 MT2A IRF4 HLA-DQA1 IRF1 HLA-DRB1 HLA-DPA1 HLA-G HLA-DQA2 HLA-DPB1 SP100 CIITA IRF5 OASL IRF8 GBP1	c2.cp
REACTOME_MEIOTIC_RECOMBINATION	0.000131062	0.00511999	0.691109	2.11946	0	69	HIST2H2AA3 HIST1H3H HIST1H4B HIST2H2AA4 HIST1H3B HIST1H2BG HIST1H2AE HIST1H4D HIST2H2AC H3F3AP6 HIST2H4A HIST1H4A HIST1H2BE HIST1H4E HIST2H2BE HIST1H2BH HIST1H2BF HIST1H2BC HIST1H2AB HIST1H2BD HIST1H2AD HIST1H3A HIST1H4I HIST1H2BJ HIST1H2BL HIST1H3D CDK2 HIST2H3C HIST2H3A HIST1H2BK HIST1H2AC H3F3B HIST1H4H HIST1H3C	c2.cp
REACTOME_INFLUENZA_LIFE_CYCLE	0.000116973	0.00511999	0.509217	1.71245	0	151	HSPA1B RPL23AP74 RPL34P27 RPL10P9 RPL21P75 RPL23AP2 RPS28P7 RPL26P30 RPL7AP66 RPL17P36 RPS21 RPS4X RPL23AP42 RPS16 RPS27 RPL36A RPS19 RPS11 RPS15 RPL37A RPL36 RPL38 RPS28 RPL9 RPS20 RPS12 RPL39 RPLP2 RPS17 RPS24 RPL30 RPL41 RPL18 RPL31 RPL35 RPL32 CALR RPS7 RPL21P16 RPL28 RPL19 RPS27A RPL18A RPL12 RPL11 RPL23A RPL23 RPLP1 POLR2H RPS5 RPS25 RPL37 RPS10 FAU RPS13 RPS3 NUP188 POLR2J RPL10 RPS6 RPL26…	c2.cp
REACTOME_INFLUENZA_VIRAL_RNA_TRANSCRIPTION_AND_REPLICATION	0.000121462	0.00511999	0.560368	1.83281	0	118	RPL23AP74 RPL34P27 RPL10P9 RPL21P75 RPL23AP2 RPS28P7 RPL26P30 RPL7AP66 RPL17P36 RPS21 RPS4X RPL23AP42 RPS16 RPS27 RPL36A RPS19 RPS11 RPS15 RPL37A RPL36 RPL38 RPS28 RPL9 RPS20 RPS12 RPL39 RPLP2 RPS17 RPS24 RPL30 RPL41 RPL18 RPL31 RPL35 RPL32 RPS7 RPL21P16 RPL28 RPL19 RPS27A RPL18A RPL12 RPL11 RPL23A RPL23 RPLP1 POLR2H RPS5 RPS25 RPL37 RPS10 FAU RPS13 RPS3 POLR2J RPL10 RPS6 RPL26 RPL14 RPS23 RPL13A…	c2.cp
REACTOME_MEIOTIC_SYNAPSIS	0.000132608	0.00511999	0.690455	2.08373	0	62	HIST2H2AA3 HIST1H4B HIST2H2AA4 HIST1H2BG HIST1H2AE HIST1H4D HIST2H2AC HIST2H4A HIST1H4A LMNA HIST1H2BE HIST1H4E HIST2H2BE HIST1H2BH HIST1H2BF HIST1H2BC HIST1H2AB HIST1H2BD HIST1H2AD HSPA2 HIST1H4I HIST1H2BJ HIST1H2BL HIST1H2BK FKBP6 HIST1H2AC SUN2 HIST1H4H	c2.cp
REACTOME_NONSENSE_MEDIATED_DECAY_ENHANCED_BY_THE_EXON_JUNCTION_COMPLEX	0.000120875	0.00511999	0.54391	1.78697	0	123	RPL23AP74 RPL34P27 RPL10P9 RPL21P75 RPL23AP2 RPS28P7 EIF4A3 RPL26P30 RPL7AP66 RPL17P36 RPS21 RPS4X RPL23AP42 RPS16 RPS27 RPL36A RPS19 RPS11 RPS15 RPL37A RPL36 RPL38 RPS28 RPL9 RPS20 RPS12 RPL39 RPLP2 RPS17 RPS24 RPL30 RPL41 RPL18 RPL31 RPL35 RPL32 RPS7 RPL21P16 RPL28 RPL19 RPS27A RPL18A RPL12 RPL11 RPL23A RPL23 RPLP1 RPS5 RPS25 RPL37 RPS10 FAU RPS13 RPS3 RPL10 RPS6 RPL26 RPL14 RPS23 RPL13A RPS15A…	c2.cp
REACTOME_AMYLOIDS	0.000132538	0.00511999	0.747599	2.25966	0	63	HIST2H2AA3 CALCA HIST1H3H HIST1H4B HIST2H2AA4 HIST1H3B HIST1H2BG HIST1H2AE HIST1H4D HIST2H2AC H3F3AP6 HIST2H4A HIST1H4A HIST1H2BE HIST1H4E PRL HIST2H2BE HIST1H2BH HIST1H2BF HIST1H2BC HIST1H2AB HIST1H2BD HIST1H2AD HIST1H3A HIST1H4I HIST1H2BJ HIST1H2BL HIST1H3D HIST2H3C HIST2H3A HIST1H2BK GSN HIST1H2AC H3F3B SAA1 TTR HIST1H4H HIST1H3C TGFBI LYZ HSPG2 HIST1H3E HIST1H4J	c2.cp
REACTOME_PACKAGING_OF_TELOMERE_ENDS	0.000140469	0.00511999	0.746949	2.08741	0	39	HIST2H2AA3 HIST1H4B HIST2H2AA4 HIST1H2BG HIST1H2AE HIST1H4D HIST2H2AC HIST2H4A HIST1H4A HIST1H2BE HIST1H4E HIST2H2BE HIST1H2BH HIST1H2BF HIST1H2BC HIST1H2AB HIST1H2BD HIST1H2AD HIST1H4I HIST1H2BJ HIST1H2BL HIST1H2BK HIST1H2AC	c2.cp
REACTOME_TELOMERE_MAINTENANCE	0.000131614	0.00511999	0.660462	2.0124	0	66	HIST2H2AA3 HIST1H4B HIST2H2AA4 HIST1H2BG HIST1H2AE HIST1H4D HIST2H2AC HIST2H4A HIST1H4A HIST1H2BE HIST1H4E HIST2H2BE HIST1H2BH HIST1H2BF HIST1H2BC HIST1H2AB HIST1H2BD HIST1H2AD HIST1H4I HIST1H2BJ HIST1H2BL HIST1H2BK HIST1H2AC HIST1H4H POLD1 HIST1H4J POLE	c2.cp
REACTOME_HEMOSTASIS	0.000208659	0.0072683	0.402178	1.4603	1	432	PPBP TREM1 SERPINE1 HIST1H3H ADRA2B GATA4 F2RL3 OLR1 MAFF GATA5 SLC16A3 SERPINA1 HIST1H3B MAG H3F3AP6 ITGB3 FCER1G KIFC1 THBS1 TF PF4 PTPN6 HBD SRGN PLAUR PLEK NOS3 RAC2 PIK3R6 ITGAX ITGB2 RHOG PECAM1 ITGA5 TGFB1 DOCK5 ANGPT2 HIST1H3A IRF7 PIK3R5 IFNA10 ITGAM FGB DOK2 HIST1H3D TIMP1 NFE2 CDK2 F11R IRF1 GNG8 HIST2H3C HIST2H3A DOCK2 DOCK6 APBB1IP FGR CD9 SELL SYK ITPR3 THBD H3F3B HMG20B COL1A1 MMP1…	c2.cp
NABA_SECRETED_FACTORS	0.000217132	0.00731944	0.437337	1.55136	1	293	PPBP CCL3 CCL4 IL1B CCL20 IL1RN S100A8 CCL2 CXCL10 S100A3 LIF CSF3 OSM S100A9 AREG S100A12 CCL4L2 GDF5 ANGPTL4 IL20 CCL26 TNFSF9 CRNN IFNK CXCL8 S100A11 PF4 CXCL3 PRL LTA WNT11 EBI3 CCL1 CXCL2 EPO TGFB1 IL6 ANGPT2 FGF4 IFNA10 CXCL13 CCL3L3 S100A10 HBEGF IL10 CLCF1 CXCL1 S100A5 IL17C NRTN CSF1 GDF15 GDNF FST TNF HHIP WNT3 IL1A S100A7 IL36G FLT3LG WFIKKN2 S100A2 IFNA13 TNFSF14 BMP4 VEGFA IHH IFNE C…	c2.cp
REACTOME_TRANSLATION	0.00023183	0.00757071	0.481774	1.63297	1	164	SRP9P1 RPL23AP74 RPL34P27 RPL10P9 RPL21P75 RPL23AP2 RPS28P7 RPL26P30 RPL7AP66 EIF4EBP1 EEF1DP1 RPL17P36 RPS21 RPS4X RPL23AP42 RPS16 RPS27 RPL36A RPS19 RPS11 RPS15 RPL37A RPL36 RPL38 RPS28 RPL9 RPS20 RPS12 RPL39 RPLP2 RPS17 RPS24 EEF1D RPL30 RPL41 RPL18 RPL31 RPL35 RPL32 RPS7 RPL21P16 RPL28 RPL19 RPS27A RPL18A RPL12 RPL11 RPL23A RPL23 RPLP1 RPS5 RPS25 EIF3G RPL37 RPS10 FAU EIF4A1 RPS13 RPS3 EIF2B4…	c2.cp
KEGG_TOLL_LIKE_RECEPTOR_SIGNALING_PATHWAY	0.000250156	0.00792162	0.535733	1.70867	1	95	CCL3 CCL4 IL1B SPP1 CXCL10 FOS LBP CD80 CD86 CD14 JUN TLR2 IL6 IRF7 PIK3R5 IFNA10 TLR8 NFKBIA TNF TLR1 IKBKE MAP2K3 MYD88 IFNA13 CD40 MAP3K8	c2.cp
PID_IL12_2PATHWAY	0.000266809	0.00820045	0.584214	1.75302	1	60	CCL3 CCL4 IL1B CD3D FOS GADD45B GADD45G TBX21 SOCS1 NFKB2 IL18R1 HLA-DRA IL18RAP CCR5 EOMES STAT5A HLA-DRB1 CD3G HLX RELB IL1R1 MAP2K3 RIPK2 RELA IL18 LCK CD4	c2.cp
BIOCARTA_IL1R_PATHWAY	0.000287687	0.00858951	0.684925	1.8453	1	32	IL1B IL1RN JUN TGFB1 IL6 NFKBIA IRAK3 TNF IL1R1 IL1A MAP2K3 MYD88 IRAK2 RELA TGFB3	c2.cp
REACTOME_CYTOKINE_SIGNALING_IN_IMMUNE_SYSTEM	0.00044116	0.0128059	0.441176	1.54882	3	250	IL1B IL1RN IL1R2 SOCS3 FCGR1A EGR1 PTPN6 SOCS1 CD44 CISH NFKB2 ICAM1 IFITM2 PRL CSF2RA NOD2 HLA-DRB5 GBP2 ISG20 IL6 HCK FCGR1B HLA-C IFITM3 IRF7 MT2A IFNA10 IRF4 HLA-DQA1 IFITM1 IL5RA EIF4A3 IRF1 STAT5A HLA-DRB1 TEC IRAK3 HLA-DPA1 HLA-G SYK HLA-DQA2 IL1R1 IL1A TNIP2 MYD88 HLA-DPB1 CSF2RB MAP3K8 SP100 RIPK2 LYN VAV1 IL6R IRAK2 RELA IL18 CIITA IRF5 OASL PSMB8 IRF8 LCK IL5 GBP1 CASP1 IL3RA TMEM189-U…	c2.cp
KEGG_HEMATOPOIETIC_CELL_LINEAGE	0.000513149	0.014493	0.541925	1.68927	3	78	IL1B CD3D CSF3 IL1R2 FCGR1A ITGB3 CD14 CD44 CSF2RA HLA-DRA ITGA5 EPO HLA-DRB5 IL4R IL6 ITGAM CD7 IL5RA CD22 CSF3R HLA-DRB1 CD3G CD37 CSF1 CD9 TNF IL1R1 IL1A FLT3LG CSF1R GP1BB CD33 IL6R ITGA2 EPOR CD4 IL5 IL3RA	c2.cp
PID_IL6_7_PATHWAY	0.000550358	0.0151348	0.630533	1.80563	3	45	FOS LBP SOCS3 JUNB JUN MYC IL6 HCK CEBPD CRP CEBPB TIMP1 IRF1 VAV1 IL6R MCL1	c2.cp
NABA_ECM_REGULATORS	0.000568893	0.0152434	0.439662	1.51475	4	201	SERPINH1 SERPINE1 SERPINA3 MMP19 SERPINA7 MMP8 SERPINA5 ADAMTS18 ADAM18 CST7 CTSE ADAMTS9 SERPINA1 ASTL TGM5 ADAM7 ADAMTS14 TGM4 ADAMTS4 MMP7 HMSD MMP3 CSTA TIMP1 PCSK6 MMP20 ADAMTS1 ADAMTSL4 MMP9 ADAM28 CTSV CTSH TGM2 MMP1 ST14 SERPINB5 SERPINC1 CST6 PLOD3 HYAL2 HYAL1 MMP14 FAM20A LOXL2 CTSZ A2ML1 ADAMTS15 SERPINB1 AGT SERPINB9 MMP21 PCSK5 MMP23B SERPINB6 PLAU ELANE P4HA1 P3H1 CTSS SERPINB10 P3H…	c2.cp
REACTOME_NEUROTRANSMITTER_RECEPTOR_BINDING_AND_DOWNSTREAM_TRANSMISSION_IN_THE_POSTSYNAPTIC_CELL	0.000618812	0.0161665	-0.406969	-1.60523	0	133	CHRNA9 CHRNG GABRA4 GABRA1 GABRB2 KCNJ16 PLCB1 RPS6KA6 GRIA2 AKAP5 CHRFAM7A CHRNA2 CAMK4 CACNG2 CHRNB3 GABRG2 GNG10 CHRNA6 GABRA2 PRKACB KCNJ3 GRIN2B CAMK2D ADCY1 GABRA6 PRKCA GRIN2A GRIA4 GNAL CHRNB2 GRIK3 GNG13 GRIP2 GNG2 GRIA3 MAPK1 CHRND CREB1 PRKCB PDPK1 NSF GRIN2D AKAP9 CHRNA7 GRIK2 CACNG4 NCALD CALM1 RASGRF2 GNB5 GABRA5 BRAF RPS6KA3 GNAI1	c2.cp
REACTOME_INTEGRIN_CELL_SURFACE_INTERACTIONS	0.000646329	0.0164735	0.545427	1.693	4	76	SPP1 COL2A1 ITGB3 THBS1 ICAM1 ITGAX ITGB2 PECAM1 ITGA5 COL4A5 ICAM2 ITGAM FGB ITGB4 F11R APBB1IP LAMA5 TNC SYK COL1A1 COL4A1 ITGA10 JAM3 ITGA2 TLN1 CDH1 RAPGEF3 COL4A2 ITGAL VWF LAMB2 BCAR1 COL4A4 BSG LAMA1 ITGB7 ITGB5 ITGA11	c2.cp
REACTOME_METABOLISM_OF_MRNA	0.000671291	0.0167024	0.44201	1.53838	5	225	HSPA1B HSPB1 RPL23AP74 ZFP36 RPL34P27 RPL10P9 RPL21P75 RPL23AP2 RPS28P7 EIF4A3 ZFP36L1 RPL26P30 PSMB9 RPL7AP66 MAPKAPK2 RPL17P36 RPS21 RPS4X RPL23AP42 RPS16 RPS27 RPL36A RPS19 RPS11 PSMB8 RPS15 RPL37A RPL36 RPL38 RPS28 RPL9 RPS20 RPS12 RPL39 RPLP2 RPS17 RPS24 RPL30 RPL41 RPL18 RPL31 RPL35 RPL32 RPS7 RPL21P16 RPL28 RPL19 RPS27A RPL18A RPL12 RPL11 RPL23A RPL23 RPLP1 RPS5 RPS25 RPL37 RPS10 FAU EIF4A…	c2.cp
KEGG_MAPK_SIGNALING_PATHWAY	0.000769146	0.0178613	0.425625	1.49794	6	260	HSPA6 PLA2G2E HSPA1A IL1B FOS HSPA1B GADD45B HSPB1 DUSP2 NR4A1 GADD45G IL1R2 PLA2G2A PPP3R2 CD14 JUN NFKB2 DUSP1 RAC2 DUSP5 MYC PLA2G12B TGFB1 HSPA2 DDIT3 FGF4 PLA2G1B GADD45A FLNC RELB JUND RPS6KA1 MAPKAPK2 RASGRP4 TNF PLA2G4E DUSP10 IL1R1 IL1A MAP2K3 RASGRP3 MAP3K8 NFATC2 FGFR4 MKNK2 DUSP16 FGFR2 RELA MOS RRAS TGFB3 PLA2G4B MECOM TNFRSF1A MAP3K6 MAPK13 FLNA PTPN7	c2.cp
KEGG_ASTHMA	0.000743605	0.0178613	0.724731	1.84843	4	24	FCER1G RNASE3 HLA-DRA HLA-DRB5 HLA-DQA1 IL10 HLA-DRB1 HLA-DQB1 HLA-DPA1 TNF HLA-DQA2 HLA-DPB1 CD40 HLA-DOA HLA-DOB IL9 HLA-DMA IL5	c2.cp
REACTOME_TRANSMISSION_ACROSS_CHEMICAL_SYNAPSES	0.000757576	0.0178613	-0.415981	-1.70444	0	179	CHRNA9 SLC1A7 CHRNG GABRA4 GABRA1 SLC18A2 GABRB2 KCNJ16 PLCB1 SLC5A7 CACNB4 RPS6KA6 GAD2 GRIA2 AKAP5 SLC32A1 CHRFAM7A CHRNA2 CAMK4 CACNG2 CHRNB3 GABRG2 GNG10 SLC6A1 CHRNA6 GABRA2 PRKACB KCNJ3 GRIN2B SLC38A1 CAMK2D ADCY1 GABRA6 PRKCA GRIN2A GRIA4 GAD1 GNAL CHRNB2 GRIK3 GNG13 GRIP2 GNG2 GRIA3 SLC1A1 MAPK1 CHRND SLC6A11 CREB1 PRKCB ALDH5A1 PDPK1 VAMP2 SNAP25 NSF GRIN2D AKAP9 ABAT GLS CHRNA7 SLC1A2 G…	c2.cp
REACTOME_SIGNALING_BY_ILS	0.00111345	0.0252946	0.501697	1.61478	8	103	IL1B IL1RN IL1R2 SOCS3 PTPN6 NFKB2 CSF2RA NOD2 IL6 HCK IL5RA STAT5A TEC IRAK3 SYK IL1R1 IL1A TNIP2 MYD88 CSF2RB MAP3K8 RIPK2 LYN VAV1 IL6R IRAK2 RELA IL18 LCK IL5 CASP1 IL3RA TMEM189-UBE2V1 STAT3	c2.cp
REACTOME_NEURONAL_SYSTEM	0.00116279	0.0258535	-0.358844	-1.54532	0	267	CHRNA9 KCNK18 SLC1A7 CHRNG GABRA4 GABRA1 SLC18A2 GABRB2 KCNJ16 PLCB1 KCND2 SLC5A7 CACNB4 RPS6KA6 GAD2 GRIA2 AKAP5 SLC32A1 CHRFAM7A CHRNA2 CAMK4 KCNA4 CACNG2 CHRNB3 KCNA2 GABRG2 KCNAB1 GNG10 KCNMB3 SLC6A1 KCNA7 CHRNA6 HCN1 GABRA2 PRKACB KCNJ3 GRIN2B KCNK1 SLC38A1 CAMK2D KCNH5 ADCY1 KCNV1 GABRA6 KCNMB2 PRKCA GRIN2A KCNK2 GRIA4 GAD1 GNAL CHRNB2 KCNS3 GRIK3 GNG13 KCNQ5 KCNH7 GRIP2 GNG2 GRIA3 SLC1A1 K…	c2.cp
REACTOME_COSTIMULATION_BY_THE_CD28_FAMILY	0.00119681	0.0260555	0.563318	1.69602	8	61	CD3D PDCD1 CD80 CD86 ICOSLG PTPN6 GRAP2 HLA-DRB5 HLA-DQA1 HLA-DRB1 CD3G HLA-DPA1 HLA-DQA2 HLA-DPB1 MAP3K8 LYN VAV1 LCK CD4	c2.cp
BIOCARTA_NKT_PATHWAY	0.00132704	0.0277926	0.692795	1.78331	8	25	CCL3 CCL4 CXCR4 CXCR3 CCR2 IL18R1 TGFB1 IL4R CCR7 CCR5 CCR1 TGFB3 CD4 IL5	c2.cp
PID_IL4_2PATHWAY	0.00132979	0.0277926	0.560118	1.68639	9	61	IGHG3 EGR2 SOCS3 CCL26 ITGB3 PTPN6 IGHG1 SOCS1 LTA SPI1 IL4R CEBPB IRF4 DOK2 IL10 STAT5A COL1A1 ETS1 INPP5D CCL17 FES PARP14 IL5	c2.cp
KEGG_INTESTINAL_IMMUNE_NETWORK_FOR_IGA_PRODUCTION	0.0017936	0.0367512	0.607838	1.73488	12	44	CD80 CD86 CXCR4 ICOSLG HLA-DRA HLA-DRB5 TGFB1 IL6 TNFRSF17 HLA-DQA1 IL10 IL15RA HLA-DRB1 HLA-DQB1 HLA-DPA1 HLA-DQA2 LTBR HLA-DPB1 CD40 HLA-DOA HLA-DOB CCL25 HLA-DMA IL5	c2.cp
KEGG_COMPLEMENT_AND_COAGULATION_CASCADES	0.00198913	0.0387591	0.555346	1.67598	14	62	SERPINE1 SERPINA5 C5AR1 SERPINA1 PLAUR C1QA C1QB C3AR1 C4B C1QC FGB C4A C3 BDKRB1 BDKRB2 THBD SERPINC1 C1R C9 CFD PLAU F11 VWF C2 C4BPB	c2.cp
BIOCARTA_CK1_PATHWAY	0.00200286	0.0387591	-0.728185	-1.88335	6	16	PLCB1 PPP3CA DRD2 PRKAR2B PRKACB PRKAR1A GRM1 CDK5R1 DRD1	c2.cp
PID_UPA_UPAR_PATHWAY	0.00196823	0.0387591	0.616436	1.70755	13	37	SERPINE1 FPR1 ITGB3 PLAUR ITGB2 ITGA5 TGFB1 MMP3 ITGAM FGB FPR2 MMP9 PLAU ELANE DOCK1 BCAR1 CTRC	c2.cp
KEGG_B_CELL_RECEPTOR_SIGNALING_PATHWAY	0.00233251	0.0443177	0.520446	1.61106	17	74	FOS PTPN6 PPP3R2 JUN RAC2 LILRB3 NFATC1 PIK3R5 NFKBIA IFITM1 CD22 BTK SYK PIK3AP1 NFATC3 CD72 RASGRP3 DAPP1 LYN NFATC2 VAV1 INPP5D RELA NFKBIE FCGR2B	c2.cp
PID_INTEGRIN2_PATHWAY	0.00248538	0.0460385	0.663468	1.73432	16	27	CYR61 FCGR2A PLAUR ICAM1 ITGAX ITGB2 ICAM2 ITGAM FGB C3 F11R TGFBI JAM3 PLAU ITGAL	c2.cp
REACTOME_METABOLISM_OF_RNA	0.00251119	0.0460385	0.405123	1.42987	22	269	HSPA1B HSPB1 RPL23AP74 ZFP36 RPL34P27 RPL10P9 RPL21P75 RPL23AP2 RPS28P7 EIF4A3 ZFP36L1 RPL26P30 PSMB9 RPL7AP66 MAPKAPK2 RPL17P36 RPS21 RPS4X RPL23AP42 RPS16 RPS27 RPL36A RPS19 RPS11 PSMB8 RPS15 RPL37A RPL36 RPL38 RPS28 RPL9 RPS20 RPS12 RPL39 RPLP2 SNRPG RPS17 RPS24 RPL30 RPL41 RPL18 RPL31 RPL35 RPL32 RPS7 RPL21P16 RPL28 RPL19 RPS27A RPL18A RPL12 RPL11 RPL23A RPL23 RPLP1 RPS5 RPS25 RPL37 RPS10 FAU…	c2.cp
PID_INTEGRIN3_PATHWAY	0.00264403	0.0476381	0.595495	1.67953	18	41	SPP1 CYR61 ITGB3 THBS1 SPHK1 PLAUR PECAM1 COL4A5 FGB F11R TNC COL1A1 COL4A1 VEGFA TGFBI	c2.cp
REACTOME_PD1_SIGNALING	0.0027544	0.0487855	0.744852	1.76639	17	17	CD3D PDCD1 PTPN6 HLA-DRB5 HLA-DQA1 HLA-DRB1 CD3G HLA-DPA1 HLA-DQA2 HLA-DPB1 LCK CD4	c2.cp
KEGG_VEGF_SIGNALING_PATHWAY	0.00285085	0.0496523	0.516399	1.59853	21	74	PLA2G2E HSPB1 SH2D2A PLA2G2A PPP3R2 SPHK1 NOS3 PTGS2 RAC2 PLA2G12B NFATC1 PIK3R5 PLA2G1B MAPKAPK2 PLA2G4E PXN NFATC3 VEGFA NFATC2	c2.cp
PID_TOLL_ENDOGENOUS_PATHWAY	0.00324388	0.0555714	0.668352	1.72039	21	25	S100A8 S100A9 SFTPA1 CD14 TLR2 TLR1 MYD88 SAA1 HSPD1 IRAK2	c2.cp
KEGG_CELL_ADHESION_MOLECULES_CAMS	0.00349735	0.05734	0.46534	1.53109	28	125	PDCD1 CD80 CD86 MAG ICOSLG ICAM1 HLA-DRA ITGB2 PECAM1 HLA-DRB5 CLDN11 ICAM2 HLA-C CLDN19 ITGAM HLA-DQA1 CLDN5 CLDN2 F11R CD22 HLA-DRB1 HLA-DQB1 CLDN6 HLA-DPA1 HLA-G SELL CNTN2 HLA-DQA2 PTPRC HLA-DPB1 CD40 HLA-DOA SELE HLA-DOB JAM3 HLA-E CDH1 CDH5 HLA-DMA MPZ CD4 ITGAL SDC4 HLA-B ESAM CLDN7 HLA-F CLDN23 NEO1 SPN ITGB7 CD274 CLDN10	c2.cp
PID_IL12_STAT4_PATHWAY	0.00345274	0.05734	0.635523	1.70512	23	31	CD3D FOS CD80 CD86 TBX21 JUN IL18R1 HLA-DRA TGFB1 IL18RAP IRF1 HLA-DRB1 CD3G	c2.cp
REACTOME_IL1_SIGNALING	0.00351173	0.05734	0.594282	1.66077	24	39	IL1B IL1RN IL1R2 NOD2 IRAK3 IL1R1 IL1A TNIP2 MYD88 MAP3K8 RIPK2 IRAK2	c2.cp
REACTOME_PHOSPHORYLATION_OF_CD3_AND_TCR_ZETA_CHAINS	0.00373425	0.0600352	0.741839	1.70924	23	15	CD3D HLA-DRB5 HLA-DQA1 HLA-DRB1 CD3G HLA-DPA1 HLA-DQA2 PTPRC HLA-DPB1 LCK CD4	c2.cp
REACTOME_INSULIN_SYNTHESIS_AND_PROCESSING	0.00405562	0.064214	-0.692368	-1.84505	13	18	MYO5A EXOC5 SLC30A5 EXOC6 SLC30A7 PCSK2 EXOC8 PCSK1 VAMP2 SNAP25 EXOC1	c2.cp
KEGG_MATURITY_ONSET_DIABETES_OF_THE_YOUNG	0.00454477	0.0678469	0.699027	1.71769	29	20	MNX1 FOXA3 MAFA ONECUT1 NEUROG3 HES1	c2.cp
SA_MMP_CYTOKINE_CONNECTION	0.00451221	0.0678469	0.737872	1.7001	28	15	IL1B TNFRSF1B CD44 FCGR3A TGFB1 TNFRSF8 CSF1 SELL TNF IL6R TNFRSF1A TNFSF8 SPN	c2.cp
REACTOME_GENERATION_OF_SECOND_MESSENGER_MOLECULES	0.00438917	0.0678469	0.658862	1.71153	29	26	CD3D GRAP2 HLA-DRB5 HLA-DQA1 HLA-DRB1 CD3G WAS VASP HLA-DPA1 HLA-DQA2 HLA-DPB1 LCK CD4 LCP2 PLCG1 ZAP70	c2.cp
REACTOME_ACETYLCHOLINE_BINDING_AND_DOWNSTREAM_EVENTS	0.00447552	0.0678469	-0.726525	-1.85389	15	15	CHRNA9 CHRNG CHRFAM7A CHRNA2 CHRNB3 CHRNA6 CHRNB2 CHRND CHRNA7	c2.cp
SIG_PIP3_SIGNALING_IN_B_LYMPHOCYTES	0.00465904	0.0679012	0.600269	1.65468	32	36	PITX2 NR4A3 PIK3R5 NR0B2 BTK RPS6KA1 SYK ITPR3 CDKN2A PTPRC DAPP1 PREX1 LYN VAV1	c2.cp
PID_REG_GR_PATHWAY	0.00467836	0.0679012	0.504519	1.55855	35	73	SFN FOS NR4A1 TBX21 CDKN1A EGR1 JUN ICAM1 PRL SPI1 NFATC1 IL6 SGK1 IRF1 STAT5A FKBP5 KRT14 MMP1 SELE RELA	c2.cp
PID_ATF2_PATHWAY	0.00482962	0.0691364	0.542388	1.60964	35	56	ATF3 FOS SOCS3 JUNB JUN DUSP1 DUSP5 IL6 HES1 DDIT3 GADD45A JUND DUSP10 SERPINB5 SELE HBG2 PLAU CSRP2 IL23A	c2.cp
KEGG_GLYCOSAMINOGLYCAN_BIOSYNTHESIS_HEPARAN_SULFATE	0.0050521	0.0713438	-0.600585	-1.74775	15	26	HS6ST2 HS2ST1 NDST3 EXTL2 XYLT1 GLCE HS6ST3 HS3ST1 HS3ST3B1 EXTL3 EXT1	c2.cp
REACTOME_NEUROTRANSMITTER_RELEASE_CYCLE	0.00590164	0.0822295	-0.556355	-1.70477	17	32	SLC1A7 SLC18A2 SLC5A7 GAD2 SLC32A1 SLC6A1 GAD1 SLC1A1 SLC6A11 ALDH5A1 VAMP2 SNAP25 ABAT GLS	c2.cp
BIOCARTA_IL10_PATHWAY	0.00642693	0.0880955	0.712755	1.69027	41	17	HMOX1 IL6 IL10 IL10RA STAT5A TNF IL1A STAT3	c2.cp
REACTOME_PEPTIDE_LIGAND_BINDING_RECEPTORS	0.00649125	0.0880955	0.424517	1.4389	55	164	PPBP CCL3 CCL4 FPR1 CCL20 CCL2 CXCL10 C5AR1 EDN2 F2RL3 RXFP4 CXCR4 CXCR3 KISS1R PF4 CCR2 CXCL3 C3AR1 CXCL2 CXCR6 CXCL16 CCR7 AGTR2 SSTR5 CXCL13 CCL3L1 CCL3L3 MC3R RXFP2 CCR5 PYY FPR2 C3 GALR2 APLNR CXCL1 GAST BDKRB1 CCR1 BDKRB2 NPY GAL NMB SAA1 NPB TACR3 QRFP UTS2R AGT CCL17 MC5R	c2.cp
KEGG_ARACHIDONIC_ACID_METABOLISM	0.00697612	0.0900006	0.532557	1.58047	51	56	PLA2G2E PLA2G2A PTGS2 PLA2G12B PLA2G1B TBXAS1 HPGDS PLA2G4E CBR3 PTGS1 ALOX5 CBR1 GPX2 CYP4F2 GGT1 PTGDS PLA2G4B GGT5 GPX1 CYP2J2 PLA2G3 CYP2C9	c2.cp
PID_FCER1_PATHWAY	0.00693703	0.0900006	0.521819	1.5658	51	60	FOS FCER1G SPHK1 JUN DUSP1 LAT2 HCLS1 PLA2G1B BTK SYK PXN LYN NFATC2 VAV1 INPP5D RELA FCGR2B PLD2 DOK1 LCP2 WIPF1 GAB2 NFKB1	c2.cp
PID_DELTA_NP63_PATHWAY	0.00674188	0.0900006	0.560486	1.60503	48	45	SFN T RRAD ADA RUNX1 CEBPD HES1 VDR FOSL2 BDKRB2 CDKN2A IL1A KRT14 GPX2 RAB38 NOTCH1 AXL CCNB2	c2.cp
REACTOME_INNATE_IMMUNE_SYSTEM	0.00682479	0.0900006	0.402033	1.39924	60	225	DEFA1B FOS DEFA4 LBP DEFA1 S100A12 CD180 CD14 UNC93B6 JUN NFKB2 CCR2 C1QA C1QB DEFA5 TLR2 NOD2 CRP IRF7 IFNA10 C1QC TLR8 NFKBIA TNFAIP3 RIPK3 C4A C3 IRF1 BTK LGALS3 RPS6KA1 MAPKAPK2 IRAK3 LY86 TLR1 IKBKE MAP2K3 MYD88 SAA1 P2RX7 RIPK2 DNM2 DEFA3 IRAK2 RELA PSTPIP1 CASP4 C9 CFD BIRC3 MAPK13 NLRC5 CD4 CASP1 TMEM189-UBE2V1 HERC5 CTSS C2 C4BPB PRKCSH CARD9 UNC93B1 TLR5 AIM2 NFKBIB DUSP6 NLRP3 C7 SIGIR…	c2.cp
KEGG_CHEMOKINE_SIGNALING_PATHWAY	0.00761509	0.0947354	0.41791	1.42294	65	175	PPBP CCL3 CCL4 CCL20 CCL2 CXCL10 CCL4L2 CCL26 CXCR4 CXCR3 PF4 CCR2 CXCL3 RAC2 CCL1 CXCL2 CXCR6 CXCL16 HCK CCR7 PIK3R5 NFKBIA CXCL13 CCL3L1 CCL3L3 CCR5 GNG8 CXCL1 DOCK2 FGR WAS CCR1 PXN NCF1 PREX1 LYN VAV1 RELA CCL17 PLCB3 CCL25 GNG5	c2.cp
PID_HNF3A_PATHWAY	0.00758534	0.0947354	0.57714	1.61286	53	39	FOXA3 FOS SERPINA1 SFTPA1 JUN FOXA1 CEBPB	c2.cp
REACTOME_CHEMOKINE_RECEPTORS_BIND_CHEMOKINES	0.00755183	0.0947354	0.545816	1.58139	54	48	PPBP CCL3 CCL4 CCL20 CCL2 CXCL10 CXCR4 CXCR3 PF4 CCR2 CXCL3 CXCL2 CXCR6 CXCL16 CCR7 CXCL13 CCL3L1 CCL3L3 CCR5 CXCL1 CCR1	c2.cp
REACTOME_PLATELET_ACTIVATION_SIGNALING_AND_AGGREGATION	0.00786953	0.0967489	0.409125	1.4071	68	194	PPBP SERPINE1 ADRA2B F2RL3 SERPINA1 ITGB3 FCER1G THBS1 TF PF4 SRGN PLEK RAC2 PIK3R6 RHOG PECAM1 TGFB1 PIK3R5 FGB TIMP1 GNG8 APBB1IP CD9 SYK ITPR3 COL1A1 PPIAP22 HSPA5 VEGFA LYN VAV1 GP1BB TGFB3 TLN1 GNG5 RAPGEF3 CFD CD63 LCK GNGT2 VWF GNA13 STX4	c2.cp
BIOCARTA_INFLAM_PATHWAY	0.00838072	0.10106	0.662165	1.66147	55	22	CSF3 LTA HLA-DRA TGFB1 IL6 IL10 HLA-DRB1 CSF1 TNF IL1A TGFB3 CD4 IL5	c2.cp
REACTOME_TOLL_RECEPTOR_CASCADES	0.00841361	0.10106	0.453284	1.47714	68	114	FOS LBP S100A12 CD180 CD14 UNC93B6 JUN NFKB2 TLR2 NOD2 IRF7 TLR8 NFKBIA BTK RPS6KA1 MAPKAPK2 IRAK3 LY86 TLR1 IKBKE MAP2K3 MYD88 SAA1 RIPK2 DNM2 IRAK2 RELA TMEM189-UBE2V1 CTSS UNC93B1 TLR5 NFKBIB DUSP6 SIGIRR PELI1 RPS27A RIPK1 TLR3 TLR6 HSP90B1 IRAK4 NOD1 IRF3 S100B MAPK7 PPP2R1B AGER CTSB	c2.cp
BIOCARTA_CCR5_PATHWAY	0.00902831	0.107211	0.696516	1.65176	58	17	CCL4 CCL2 FOS CXCR4 JUN CCR5	c2.cp
PID_NFAT_TFPATHWAY	0.00946284	0.110522	0.565385	1.59461	67	41	EGR4 FOS EGR2 JUNB TBX21 FOSL1 EGR1 JUN IKZF1 PTGS2 NFATC1 IRF4 TNF NFATC3 NFATC2	c2.cp
REACTOME_TCR_SIGNALING	0.00951863	0.110522	0.534394	1.56003	69	50	CD3D GRAP2 HLA-DRB5 NFKBIA HLA-DQA1 HLA-DRB1 CD3G WAS VASP HLA-DPA1 HLA-DQA2 PTPRC HLA-DPB1 RIPK2 RELA LCK CD4 TMEM189-UBE2V1 LCP2	c2.cp
BIOCARTA_NTHI_PATHWAY	0.0100194	0.115058	0.653357	1.64914	66	23	IL1B DUSP1 TLR2 NFKBIA TNF MAP2K3 MYD88 RELA	c2.cp
PID_ERA_GENOMIC_PATHWAY	0.010338	0.117426	0.502617	1.51919	77	63	POU4F2 POU4F1 JUN PRL MYC CEBPB NR0B2 TRIM59 C3 STAT5A KLRC3 XBP1 CD82 PDIA2 SRA1 HDAC1 COL18A1 NR0B1 ATP5J MTA1 NEDD8 NCOR2 CTSD	c2.cp
PID_AVB3_OPN_PATHWAY	0.0107898	0.12124	0.599652	1.60888	74	31	SPP1 FOS ITGB3 JUN CD44 NFKBIA MMP9 GSN SYK RELA PLAU BCAR1 NFKB1	c2.cp
PID_AMB2_NEUTROPHILS_PATHWAY	0.0113366	0.126029	0.563088	1.57933	80	40	PLAUR ICAM1 ITGB2 IL6 HCK ITGAM FGR MMP9 TNF LYN JAM3 TLN1 LCK PLAU	c2.cp
KEGG_PRION_DISEASES	0.0120829	0.132911	0.591844	1.59452	83	32	HSPA1A IL1B EGR1 C1QA C1QB IL6 C1QC IL1A HSPA5 C9 NOTCH1	c2.cp
KEGG_FC_GAMMA_R_MEDIATED_PHAGOCYTOSIS	0.0128157	0.139504	0.460735	1.46523	101	93	FCGR1A FCGR2A SPHK1 FCGR3A RAC2 HCK SCIN PIK3R5 PLD1 DOCK2 WAS VASP GSN SYK PLA2G4E PTPRC NCF1 LYN VAV1 INPP5D DNM2 ARPC1B WASF2 FCGR2B PLA2G4B PLD2 MARCKSL1 LIMK2	c2.cp
PID_CXCR4_PATHWAY	0.0133912	0.144266	0.452996	1.45367	107	100	CD3D RGS1 CXCR4 PTPN6 PIK3R6 HLA-DRA ITGA5 HCK PIK3R5 STAT5A HLA-DRB1 CD3G FGR MMP9 PXN PTPRC ITGA10 RHOC LYN VAV1 INPP5D PLCB3 ITGA2 LCK CD4 PLCB2 GNA13 STAT3 RHOB	c2.cp
REACTOME_ACTIVATED_TLR4_SIGNALLING	0.0136952	0.146035	0.458758	1.45678	108	91	FOS S100A12 CD14 JUN NFKB2 TLR2 NOD2 IRF7 NFKBIA BTK RPS6KA1 MAPKAPK2 IRAK3 TLR1 IKBKE MAP2K3 MYD88 SAA1 RIPK2 IRAK2 RELA TMEM189-UBE2V1 NFKBIB DUSP6 SIGIRR PELI1 RPS27A RIPK1 TLR3 TLR6 IRAK4 NOD1 IRF3 S100B MAPK7 PPP2R1B AGER	c2.cp
BIOCARTA_EPO_PATHWAY	0.0144575	0.152607	0.662588	1.60778	94	19	FOS PTPN6 JUN EPO STAT5A EPOR	c2.cp
KEGG_NOD_LIKE_RECEPTOR_SIGNALING_PATHWAY	0.0148594	0.155281	0.507475	1.51049	110	57	IL1B CCL2 CXCL2 NOD2 IL6 NFKBIA TNFAIP3 CXCL1 TNF RIPK2 RELA IL18 PSTPIP1 TRIP6 BIRC3 MAPK13 PYDC1 CASP1 CARD6 CARD9 NFKBIB NLRP3 NFKB1 PYCARD HSP90AA1 CCL13 HSP90B1 NOD1 CCL8	c2.cp
BIOCARTA_UCALPAIN_PATHWAY	0.0151145	0.156383	0.668399	1.60501	98	18	ITGB3 ACTA1 CAPNS2 PXN EZR TLN1 ACTN3	c2.cp
REACTOME_GPCR_LIGAND_BINDING	0.0158023	0.161896	0.359237	1.29148	148	356	CALCA PPBP PTH2 CCL3 CCL4 FPR1 GHRH CCL20 ADRA2B CCL2 CXCL10 C5AR1 EDN2 F2RL3 HCAR2 RXFP4 OPN1MW FFAR3 CXCR4 CXCR3 KISS1R PF4 ADM S1PR5 GIPR LHB GPR4 CCR2 CXCL3 CALCB C3AR1 WNT11 CXCL2 CXCR6 CXCL16 ADORA3 CCR7 AGTR2 TAS1R1 SSTR5 CXCL13 CCL3L1 CCL3L3 MC3R P2RY2 RXFP2 CCR5 PYY FPR2 C3 PTGER2 TSHB GALR2 GNG8 APLNR CXCL1 GAST BDKRB1 CCR1 BDKRB2 NPY WNT3 GAL NMB PTGER1 PTGIR SAA1 FFAR2 IHH NPB TACR3 G…	c2.cp
BIOCARTA_CTLA4_PATHWAY	0.0161832	0.164189	0.665105	1.5971	105	18	CD3D CD80 CD86 ICOSLG HLA-DRA HLA-DRB1 CD3G	c2.cp
KEGG_ANTIGEN_PROCESSING_AND_PRESENTATION	0.0163827	0.164615	0.480941	1.47493	124	69	HSPA6 HSPA1A IFI30 HSPA1B LTA HLA-DRA HLA-DRB5 HSPA2 HLA-C CD74 IFNA10 HLA-DQA1 HLA-DRB1 HLA-DQB1 HLA-DPA1 HLA-G HLA-DQA2 IFNA13 HLA-DPB1 HSPA5 HLA-DOA KLRC3 TAP1 HLA-DOB HLA-E CIITA HLA-DMA CD4	c2.cp
KEGG_TYPE_I_DIABETES_MELLITUS	0.0165591	0.164802	0.555429	1.54641	117	38	IL1B CD80 CD86 LTA HLA-DRA HLA-DRB5 HLA-C HLA-DQA1 HLA-DRB1 HLA-DQB1 HLA-DPA1 HLA-G TNF HLA-DQA2 IL1A HLA-DPB1 HLA-DOA HSPD1 HLA-DOB HLA-E HLA-DMA HLA-B IL12A HLA-F FAS	c2.cp
KEGG_TERPENOID_BACKBONE_BIOSYNTHESIS	0.0167832	0.165457	-0.64615	-1.6488	59	15	IDI2 HMGCS2	c2.cp
REACTOME_TRAFFICKING_OF_AMPA_RECEPTORS	0.0170778	0.166788	-0.542782	-1.59865	53	27	GRIA2 AKAP5 CACNG2 CAMK2D PRKCA GRIA4 GRIP2 GRIA3 PRKCB NSF CACNG4	c2.cp
SA_G1_AND_S_PHASES	0.0177377	0.169063	0.690834	1.59172	113	15	CDKN1A PRB1 CDK2 NXT1 CDKN2A	c2.cp
REACTOME_G_ALPHA_I_SIGNALLING_EVENTS	0.0176471	0.169063	0.4011	1.36692	152	177	PPBP FPR1 CCL20 RGS1 ADRA2B CXCL10 C5AR1 HCAR2 RXFP4 OPN1MW CXCR4 CXCR3 PF4 S1PR5 CCR2 CXCL3 C3AR1 CXCL2 CXCR6 CXCL16 ADORA3 CCR7 AGTR2 SSTR5 CXCL13 GNAT2 CCR5 PYY FPR2 C3 GALR2 GNG8 APLNR CXCL1 GNAT1 BDKRB1 CCR1 BDKRB2 NPY	c2.cp
REACTOME_INTERFERON_SIGNALING	0.0177961	0.169063	0.41524	1.39059	150	146	SOCS3 FCGR1A EGR1 PTPN6 SOCS1 CD44 ICAM1 IFITM2 HLA-DRB5 GBP2 ISG20 FCGR1B HLA-C IFITM3 IRF7 MT2A IFNA10 IRF4 HLA-DQA1 IFITM1 EIF4A3 IRF1 HLA-DRB1 HLA-DPA1 HLA-G HLA-DQA2 HLA-DPB1 SP100 CIITA IRF5 OASL PSMB8 IRF8 GBP1 HERC5 HLA-B ISG15 HLA-F RPS27A IFIT2 EIF4A1 NUP188 PML PLCG1 IFI35	c2.cp
KEGG_DRUG_METABOLISM_CYTOCHROME_P450	0.01812	0.17059	-0.440795	-1.49799	47	52	ADH1C GSTM1 ALDH3A1 UGT2A1 CYP2C18 UGT2B15 FMO1 CYP3A43 GSTA1 FMO2 CYP2A6 CYP2C8 GSTM5 UGT1A7 ALDH1A3	c2.cp
PID_IL23_PATHWAY	0.0185558	0.1716	0.575915	1.55161	128	32	IL1B CCL2 SOCS3 IL18R1 IL6 IL18RAP NFKBIA STAT5A CXCL1 TNF RELA IL18 IL24 CD4 IL23A STAT3	c2.cp
PID_HIF1_TFPATHWAY	0.0184259	0.1716	0.484891	1.47452	139	65	SERPINE1 FOS PLIN2 CXCR4 TF ADM HMOX1 JUN ITGB2 EPO HK2 ETS1 NDRG1 VEGFA BHLHE41 MCL1 SLC2A1 PFKFB3 BHLHE40 EGLN3 TFRC LEP GATA2 CITED2 HDAC7 PFKL SP1	c2.cp
KEGG_JAK_STAT_SIGNALING_PATHWAY	0.0191456	0.175502	0.422627	1.40013	159	132	LIF CSF3 OSM SOCS3 IL20 IFNK PTPN6 SOCS1 CISH PRL CSF2RA MYC EPO IL4R IL6 PIK3R5 IFNA10 IL10 CLCF1 IL5RA IL10RA IL15RA STAT5A CSF3R PIM1 IFNA13 CSF2RB OSMR IFNE IL6R IL9 IFNW1 IL24 EPOR TSLP SPRY1 IL5 IL22RA1 CNTF IL3RA IL23A STAT3 IL13RA1 LEP IL12A IL20RB	c2.cp
REACTOME_REGULATION_OF_BETA_CELL_DEVELOPMENT	0.019605	0.17815	0.603511	1.56774	133	26	FOXA3 MAFA ONECUT1 NEUROG3 HES1 NKX2-2 PAX6 FOXO1 PTF1A FGF10 NEUROD1 HNF1B	c2.cp
BIOCARTA_CCR3_PATHWAY	0.0199702	0.178937	-0.576077	-1.59742	66	21	MYL2 PLCB1 NOX1 CCR3 ROCK2 PRKCA GNAQ MAPK1 PRKCB	c2.cp
PID_GMCSF_PATHWAY	0.0200341	0.178937	0.562774	1.54116	140	35	CCL2 FOS OSM CISH CSF2RA STAT5A PIM1 SYK CSF2RB LYN INPP5D IRF8 STAT3	c2.cp
KEGG_ALLOGRAFT_REJECTION	0.0205696	0.179696	0.571794	1.54051	142	32	CD80 CD86 HLA-DRA HLA-DRB5 HLA-C HLA-DQA1 IL10 HLA-DRB1 HLA-DQB1 HLA-DPA1 HLA-G TNF HLA-DQA2 HLA-DPB1 CD40 HLA-DOA HLA-DOB HLA-E HLA-DMA IL5 HLA-B IL12A HLA-F FAS	c2.cp
PID_INTEGRIN1_PATHWAY	0.0206349	0.179696	0.481139	1.45872	155	64	SPP1 COL2A1 THBS1 PLAUR CD14 ITGA5 COL4A5 FGB NID1 LAMA5 TNC TGM2 COL1A1 COL4A1 ITGA10 VEGFA TGFBI THBS2 ITGA2 PLAU LAMB2 COL6A2 COL4A4 LAMA1 COL18A1 ITGA11 COL6A1 CD81 COL11A2 ITGB1 ITGA6	c2.cp
REACTOME_DEGRADATION_OF_THE_EXTRACELLULAR_MATRIX	0.0205235	0.179696	0.609953	1.55569	137	24	MMP8 CTRB1 MMP7 MMP3 TIMP1 MMP9 MMP1 MMP14 TPSAB1 ELANE MMP11	c2.cp
BIOCARTA_NFKB_PATHWAY	0.0212352	0.181892	0.615773	1.55427	141	23	TNFRSF1B NFKBIA TNFAIP3 TNF IL1R1 IL1A MYD88 RELA TNFRSF1A NFKB1 RIPK1 TRADD	c2.cp
PID_BCR_5PATHWAY	0.0211898	0.181892	0.480925	1.46246	160	65	BCL2A1 FOS PTPN6 JUN NFATC1 NFKBIA CD22 BTK SYK PTPRC PIK3AP1 ETS1 CD72 DAPP1 LYN INPP5D RELA FCGR2B DOK1	c2.cp
KEGG_VIRAL_MYOCARDITIS	0.0239379	0.203375	0.473525	1.44614	181	67	CD80 CD86 MYH6 ICAM1 RAC2 HLA-DRA ITGB2 HLA-DRB5 HLA-C HLA-DQA1 HLA-DRB1 HLA-DQB1 HLA-DPA1 HLA-G HLA-DQA2 HLA-DPB1 CD40 HLA-DOA HLA-DOB HLA-E MYH7 HLA-DMA ITGAL SGCA HLA-B HLA-F MYH9 MYH3 CD55	c2.cp
KEGG_P53_SIGNALING_PATHWAY	0.0242169	0.204086	0.475438	1.44864	183	66	SFN SERPINE1 GADD45B GADD45G CDKN1A THBS1 GADD45A CDK2 CDKN2A TNFRSF10B SERPINB5 CCNE2 TP53I3 CCNB3 CD82 TP53AIP1 CCNB2 CHEK2 DDB2 FAS BBC3	c2.cp
BIOCARTA_ETS_PATHWAY	0.0244275	0.204214	0.643281	1.5447	159	18	FOS JUN CSF1 ETS1 CSF1R ETV3 DDX20 ETS2 NCOR2	c2.cp
REACTOME_DOWNSTREAM_TCR_SIGNALING	0.0249105	0.204275	0.559171	1.51437	173	33	CD3D HLA-DRB5 NFKBIA HLA-DQA1 HLA-DRB1 CD3G HLA-DPA1 HLA-DQA2 HLA-DPB1 RIPK2 RELA LCK CD4 TMEM189-UBE2V1	c2.cp
REACTOME_ACTIVATION_OF_GENES_BY_ATF4	0.0249851	0.204275	0.599822	1.52985	167	24	ATF3 CCL2 DDIT3 ATF4P3 HERPUD1 ATF4	c2.cp
REACTOME_FACTORS_INVOLVED_IN_MEGAKARYOCYTE_DEVELOPMENT_AND_PLATELET_PRODUCTION	0.0250213	0.204275	0.424608	1.38669	205	116	HIST1H3H GATA4 MAFF GATA5 HIST1H3B H3F3AP6 KIFC1 HBD DOCK5 HIST1H3A IRF7 IFNA10 HIST1H3D NFE2 CDK2 IRF1 HIST2H3C HIST2H3A DOCK2 DOCK6 H3F3B HMG20B HIST1H3C GATA1 KLC3 HIST1H3E HBG2 EHD2 DOCK1 DOCK8 EHD1 SH2B3 KIF2C HIST1H3G KIF20A ZFPM1 KIF5A DOCK10 HDAC1 GATA2	c2.cp
KEGG_LEUKOCYTE_TRANSENDOTHELIAL_MIGRATION	0.0256442	0.204566	0.427962	1.39256	209	112	CXCR4 ICAM1 RAC2 ITGB2 PECAM1 NCF2 CLDN11 RHOH CLDN19 PIK3R5 ITGAM CLDN5 CLDN2 F11R CYBA SIPA1 VASP MMP9 CLDN6 PXN NCF1 NCF4 MSN MYL12A VAV1 JAM3 CTNNA3 EZR RAPGEF3 CDH5 MAPK13 MYLPF ITGAL ACTN3 CTNNA1 CYBB ESAM CLDN7 BCAR1 CLDN23	c2.cp
BIOCARTA_IL12_PATHWAY	0.0254507	0.204566	0.628456	1.54428	167	20	CD3D CXCR3 JUN IL18R1 CCR5 CD3G IL18	c2.cp
REACTOME_ION_CHANNEL_TRANSPORT	0.025641	0.204566	-0.427947	-1.44627	67	51	GABRA4 GABRA1 GABRB2 HTR3B GLRA3 GLRA2 GABRG2 ATP12A ATP1A4 GABRA2 ATP8A1 GLRB GABRA6 ATP2C2 ATP1B1 ATP2B2 ATP8A2 ATP2A2 HTR3A ATP2C1 ATP9A	c2.cp
REACTOME_LIGAND_GATED_ION_CHANNEL_TRANSPORT	0.0268143	0.21228	-0.590513	-1.60178	91	19	GABRA4 GABRA1 GABRB2 HTR3B GLRA3 GLRA2 GABRG2 GABRA2 GLRB GABRA6	c2.cp
PID_IL1_PATHWAY	0.0292523	0.229839	0.549707	1.49727	204	34	IL1B IL1RN IL1R2 JUN IRAK3 IL1R1 IL1A MYD88 RELA	c2.cp
REACTOME_INTERFERON_ALPHA_BETA_SIGNALING	0.0305221	0.236264	0.482072	1.43488	227	57	SOCS3 EGR1 PTPN6 SOCS1 IFITM2 GBP2 ISG20 HLA-C IFITM3 IRF7 IFNA10 IRF4 IFITM1 IRF1 HLA-G IRF5 OASL PSMB8 IRF8 HLA-B ISG15 HLA-F IFIT2	c2.cp
REACTOME_MYD88_MAL_CASCADE_INITIATED_ON_PLASMA_MEMBRANE	0.0303108	0.236264	0.449438	1.40706	236	81	FOS S100A12 JUN NFKB2 TLR2 NOD2 NFKBIA BTK RPS6KA1 MAPKAPK2 IRAK3 TLR1 MAP2K3 MYD88 SAA1 RIPK2 IRAK2 RELA TMEM189-UBE2V1 NFKBIB DUSP6 SIGIRR PELI1 RPS27A TLR6 IRAK4 NOD1 S100B MAPK7 PPP2R1B AGER	c2.cp
REACTOME_CA_DEPENDENT_EVENTS	0.0316256	0.243005	-0.511683	-1.50706	99	27	CAMK4 PRKAR2B PRKACB PRKAR1A ADCY1 PRKCA MAPK1 CREB1 PDE1B CALM1 PDE1A	c2.cp
REACTOME_PERK_REGULATED_GENE_EXPRESSION	0.0323099	0.246452	0.575048	1.50319	220	27	ATF3 CCL2 DDIT3 ATF4P3 HSPA5 HERPUD1 ATF4	c2.cp
REACTOME_SMAD2_SMAD3_SMAD4_HETEROTRIMER_REGULATES_TRANSCRIPTION	0.0328812	0.248991	0.582545	1.49952	222	25	SERPINE1 JUNB MYC TGIF1 HDAC1 RPS27A SMAD7 SP1	c2.cp
ST_TUMOR_NECROSIS_FACTOR_PATHWAY	0.033522	0.252018	0.564502	1.49677	230	29	TNFRSF1B JUN NFKB2 NFKBIA TNFAIP3 TNF NFKBIE TNFRSF1A BIRC3 CFLAR NFKBIB NFKB1 RIPK1 TRADD	c2.cp
BIOCARTA_DC_PATHWAY	0.0338179	0.252426	0.63898	1.51532	220	17	ITGAX TLR2 CD7 IL10 CD40 CD33 IL5 ANPEP IL12A CD5	c2.cp
KEGG_CELL_CYCLE	0.0346493	0.256798	0.410266	1.34903	286	124	SFN GADD45B GADD45G CDKN1A CDC45 MYC TGFB1 CDKN1C GADD45A CDK2 MCM5 CDKN2A PTTG2 CCNE2 CDKN2C CCNB3 CDC20 TGFB3 MAD2L2 CDC25C CCNB2 CHEK2 SMC1B HDAC1 MCM7 PTTG1	c2.cp
BIOCARTA_NGF_PATHWAY	0.0354198	0.26066	0.627362	1.50647	231	18	FOS NGFR JUN NGF PIK3CG PLCG1	c2.cp
BIOCARTA_CHREBP2_PATHWAY	0.0364018	0.262344	-0.453961	-1.46112	103	40	PRKAA2 PRKAA1 PRKAR2B PKLR PRKACB PRKAR1A PPP2R5E YWHAZ PPP2R5C PPP2R2C PPP2CB PRKAG2 YWHAB PPP2CA PRKAR2A PPP2R2B YWHAG	c2.cp
PID_P73PATHWAY	0.0363237	0.262344	0.45038	1.39798	280	76	SFN SERPINE1 SERPINA1 CDKN1A ADA MYC IL4R CDK2 GDF15 PLK3 S100A2 CCNE2 TP53I3 CLCA2 RELA GATA1 TP53AIP1 PFDN5 AEN HEY2 BAK1 FAS BBC3 HSF1 PML SP1 BCL2L11 WWOX KAT5 ABL1 CASP2	c2.cp
REACTOME_GPVI_MEDIATED_ACTIVATION_CASCADE	0.035966	0.262344	0.549933	1.47548	249	31	FCER1G RAC2 PIK3R6 RHOG PIK3R5 SYK COL1A1 LYN VAV1 LCK LCP2 RHOB	c2.cp
PID_HNF3B_PATHWAY	0.0367381	0.262954	0.511533	1.44272	263	41	FOXA3 UCP2 FOXA1 CEBPD CEBPB DLK1 PCK1 TTR CEBPA CPT1B FOXF1 ACADVL TFRC	c2.cp
PID_IL27_PATHWAY	0.0376851	0.266087	0.590071	1.4894	251	23	IL1B TBX21 EBI3 IL27 TGFB1 IL6 STAT5A TNF IL18 STAT3 IL12A	c2.cp
PID_EPO_PATHWAY	0.0375285	0.266087	0.537717	1.46461	262	34	SOCS3 PTPN6 EPO BTK STAT5A TEC LYN INPP5D EPOR SH2B3 NFKB1 PLCG1 GAB1	c2.cp
BIOCARTA_COMP_PATHWAY	0.0381025	0.26708	0.632812	1.50069	248	17	C1QA C1QB C4B C1QC C4A C3 C1R C9 CFD C2 C7	c2.cp
PID_HDAC_CLASSIII_PATHWAY	0.0383368	0.26708	0.576206	1.4832	259	25	CDKN1A HIST1H1E MYOD1 HOXA10 ACSS2 SIRT2 FOXO4 TUBB2A SIRT7 FOXO1 ACSS1 BAX	c2.cp
PID_INTEGRIN_A9B1_PATHWAY	0.0393595	0.270831	0.594103	1.49069	262	22	SPP1 SAT1 CSF2RA TNC PXN TGM2 VEGFA BCAR1 PAOX ADAM15	c2.cp
PID_IL2_1PATHWAY	0.0393935	0.270831	0.480934	1.41457	290	53	FOS SOCS3 SOCS1 JUN CISH MYC DOK2 CDK2 STAT5A MAPKAPK2 SYK	c2.cp
PID_MYC_REPRESS_PATHWAY	0.040313	0.27534	0.46265	1.39624	303	62	SLC11A1 CDKN1A SPI1 MYC CEBPD DDIT3 GADD45A TJP2 DKK1 ITGB4 ZFP36L1 S100A7 NDRG1 CEBPA SFRP1 IRF8 FTH1 CFLAR HDAC1 ZBTB17 PDGFRB SP1 GFI1 ITGB1 ITGA6 CLU CCL5	c2.cp
PID_TCR_PATHWAY	0.0406686	0.275965	0.457981	1.39545	308	66	CD3D CD80 CD86 PTPN6 GRAP2 HLA-DRA HLA-DRB1 CD3G WAS PTPRC MAP3K8 ORAI1 VAV1 INPP5D SLA2 LCK CD4 FLNA	c2.cp
BIOCARTA_TOLL_PATHWAY	0.0413328	0.277709	0.521838	1.44551	293	37	FOS CD14 JUN TLR2 NFKBIA MAP2K3 MYD88 RELA NFKB1 TLR3 TLR6	c2.cp
REACTOME_CLASS_A1_RHODOPSIN_LIKE_RECEPTORS	0.041457	0.277709	0.358602	1.2646	378	267	PPBP CCL3 CCL4 FPR1 CCL20 ADRA2B CCL2 CXCL10 C5AR1 EDN2 F2RL3 HCAR2 RXFP4 OPN1MW FFAR3 CXCR4 CXCR3 KISS1R PF4 S1PR5 LHB GPR4 CCR2 CXCL3 C3AR1 CXCL2 CXCR6 CXCL16 ADORA3 CCR7 AGTR2 SSTR5 CXCL13 CCL3L1 CCL3L3 MC3R P2RY2 RXFP2 CCR5 PYY FPR2 C3 PTGER2 TSHB GALR2 APLNR CXCL1 GAST BDKRB1 CCR1 BDKRB2 NPY GAL NMB PTGER1 PTGIR SAA1 FFAR2 NPB TACR3 GPBAR1 QRFP UTS2R P2RY6 AGT CCL17 MC5R GPR132 OXER1 CCL25	c2.cp
KEGG_CYTOSOLIC_DNA_SENSING_PATHWAY	0.0438704	0.292004	0.48416	1.40811	320	49	CCL4 IL1B CXCL10 CCL4L2 IL6 IRF7 IFNA10 NFKBIA RIPK3 IKBKE IFNA13 RELA IL18 TREX1 CASP1 AIM2 NFKBIB NFKB1 RIPK1 PYCARD	c2.cp
BIOCARTA_NOS1_PATHWAY	0.0455748	0.299533	-0.544539	-1.4949	154	20	PPP3CA PRKAR2B PRKACB GRIN2B PRKAR1A PRKCA PPP3CB GRIN2A NOS1 PRKCB GRIN2D CALM1	c2.cp
BIOCARTA_TNFR2_PATHWAY	0.0453435	0.299533	0.614242	1.47496	296	18	TNFRSF1B DUSP1 LTA NFKBIA TNFAIP3 RELA TRAF1 NFKB1 RIPK1	c2.cp
ST_GA12_PATHWAY	0.0469568	0.306686	0.578078	1.45913	313	23	F2RL3 JUN NR4A3 BTK PLD1 VAV1 PLD2	c2.cp
KEGG_SPLICEOSOME	0.0476248	0.309118	0.401483	1.31904	393	123	HSPA6 HSPA1A HSPA1B HSPA2 EIF4A3 SNRPG NAA38 XAB2 LSM7 SRSF3 SART1 HSPA1L SF3B4 PRPF31 SF3B2 DHX38 SNRPB PQBP1 SF3A2 SNRPA CCDC12 ACIN1 PRPF3 SRSF4 RBM17 SNRPC PHF5A BCAS2 SNRNP70 SNW1 SRSF7 SNRPD2 USP39 THOC3 LSM2 BUD31 U2AF2 U2AF1 PRPF8 SYF2 CWC15 TRA2B SNRNP40 SNRPF TXNL4A PCBP1 RBM22 DDX23 PPIH HNRNPA1 CTNNBL1	c2.cp
KEGG_T_CELL_RECEPTOR_SIGNALING_PATHWAY	0.048587	0.309594	0.41661	1.3395	391	102	CD3D FOS PDCD1 PTPN6 PPP3R2 JUN GRAP2 NFATC1 PIK3R5 NFKBIA IL10 CD3G TEC TNF PTPRC NFATC3 MAP3K8 NFATC2 VAV1 RELA NFKBIE MAPK13 LCK CD4 IL5	c2.cp
REACTOME_TRIF_MEDIATED_TLR3_SIGNALING	0.0483054	0.309594	0.444417	1.37174	371	72	FOS S100A12 JUN NFKB2 NOD2 IRF7 NFKBIA RIPK3 RPS6KA1 MAPKAPK2 IKBKE MAP2K3 SAA1 RIPK2 IRAK2 RELA NFKBIB DUSP6 RPS27A RIPK1 TLR3 NOD1 IRF3 S100B MAPK7 PPP2R1B AGER	c2.cp
REACTOME_ACTIVATION_OF_NMDA_RECEPTOR_UPON_GLUTAMATE_BINDING_AND_POSTSYNAPTIC_EVENTS	0.0481135	0.309594	-0.452852	-1.42702	138	37	RPS6KA6 GRIA2 CAMK4 PRKACB GRIN2B CAMK2D ADCY1 GRIN2A GRIA4 GRIA3 MAPK1 CREB1 PDPK1 GRIN2D AKAP9 CALM1 RASGRF2 BRAF RPS6KA3	c2.cp
BIOCARTA_RELA_PATHWAY	0.0500999	0.311633	0.628436	1.47285	325	16	TNFRSF1B NFKBIA TNF RELA TNFRSF1A NFKB1 RIPK1 TRADD	c2.cp
PID_BETA_CATENIN_NUC_PATHWAY	0.0493314	0.311633	0.439346	1.36053	379	75	SFN T CYR61 PITX2 JUN MYC KLF4 FGF4 DKK1 IGF2BP1 MMP9 CDKN2A SNAI2 TCF7 SP5 CDH1	c2.cp
REACTOME_IMMUNOREGULATORY_INTERACTIONS_BETWEEN_A_LYMPHOID_AND_A_NON_LYMPHOID_CELL	0.0500402	0.311633	0.465003	1.37999	372	56	CD3D ICAM1 TYROBP FCGR3A LILRB3 LILRB4 ITGB2 LILRB1 ICAM2 HLA-C HCST IFITM1 C3 CD3G HLA-G SELL CD40 LILRB2 FCGR2B CDH1 ULBP2 ITGAL HLA-B CRTAM HLA-F ULBP1	c2.cp
REACTOME_TRAFFICKING_OF_GLUR2_CONTAINING_AMPA_RECEPTORS	0.0497902	0.311633	-0.587648	-1.49952	177	15	GRIA2 PRKCA GRIA4 GRIP2 GRIA3 PRKCB NSF	c2.cp
PID_EPHRINB_REV_PATHWAY	0.0510843	0.315151	0.546222	1.4403	350	28	CXCR4 ITGB3 HCK FGB FGR LYN EFNB1 RGS3 LCK	c2.cp
REACTOME_CELL_CYCLE	0.0512686	0.315151	0.337831	1.21951	486	383	HIST2H2AA3 HIST1H4B HIST2H2AA4 UBE2C HIST1H2BG HIST1H2AE HIST1H4D CDKN1A HIST2H2AC HIST2H4A HIST1H4A LMNA HIST1H2BE HIST1H4E HIST2H2BE HIST1H2BH RBBP4P1 HIST1H2BF HIST1H2BC HIST1H2AB CDC45 HIST1H2BD HIST1H2AD MYC MCM10 HSPA2 HIST1H4I HIST1H2BJ HIST1H2BL TYMS CDK2 MCM5 PSMB9 HIST1H2BK FKBP6 HIST1H2AC CENPA CDKN2A SUN2 HIST1H4H CCNE2 RPA4 CDKN2C GMNN GINS4 CDC20 RPS27 POLD1 HIST1H4J POLE PSMB8 REC8…	c2.cp
ST_FAS_SIGNALING_PATHWAY	0.0519841	0.317681	0.45174	1.36959	392	64	TNFRSF6B HSPB1 NFKB2 NR0B2 NFKBIA CD7 BTK IL1A NFKBIE EZR NFKBIB DEDD2 BAK1 FAS NFKB1 RIPK1	c2.cp
REACTOME_TAK1_ACTIVATES_NFKB_BY_PHOSPHORYLATION_AND_ACTIVATION_OF_IKKS_COMPLEX	0.0523404	0.317998	0.57304	1.44641	349	23	S100A12 NFKB2 NOD2 NFKBIA SAA1 RIPK2 IRAK2 RELA NFKBIB NOD1 S100B AGER	c2.cp
REACTOME_AMINE_LIGAND_BINDING_RECEPTORS	0.0531148	0.320838	-0.469306	-1.43804	161	32	DRD3 HTR2C ADRB3 DRD2 HTR2A HTR2B HTR1D ADRA1D HTR4 CHRM2 ADRA1A DRD1 HTR6	c2.cp
KEGG_PATHOGENIC_ESCHERICHIA_COLI_INFECTION	0.0556377	0.332757	0.462441	1.36901	413	55	CD14 KRT18 TUBB7P TUBA1C HCLS1 TUBAL3 TUBB8 TUBB6 WAS ARPC1B EZR TUBA3E CDH1	c2.cp
REACTOME_LATENT_INFECTION_OF_HOMO_SAPIENS_WITH_MYCOBACTERIUM_TUBERCULOSIS	0.0557249	0.332757	0.539653	1.43088	383	29	SLC11A1 NOS3 NCF2 TCIRG1 ATP6V0A4 CYBA NCF4 ATP6V0E1	c2.cp
KEGG_ETHER_LIPID_METABOLISM	0.0568858	0.333479	0.537992	1.42648	391	29	PLA2G2E PLA2G2A PLA2G12B ENPP2 PLA2G1B PLD1 PLA2G4E PLA2G4B PLD2 PLA2G3 PAFAH1B3 LPCAT2 PLA2G2C	c2.cp
BIOCARTA_TH1TH2_PATHWAY	0.0583986	0.333479	0.619124	1.45102	379	16	CD86 IL18R1 HLA-DRA IL4R HLA-DRB1 CD40 IL18	c2.cp
PID_ANGIOPOIETIN_RECEPTOR_PATHWAY	0.0577917	0.333479	0.469663	1.37106	424	50	CDKN1A NOS3 ITGA5 ANGPT2 DOK2 STAT5A TNF PXN TNIP2 ETS1 RELA FES GRB7 PLD2 ELF1	c2.cp
REACTOME_GROWTH_HORMONE_RECEPTOR_SIGNALING	0.0582218	0.333479	0.579153	1.43971	386	21	SOCS3 PTPN6 SOCS1 CISH PRL STAT5A LYN	c2.cp
REACTOME_RIP_MEDIATED_NFKB_ACTIVATION_VIA_DAI	0.0578626	0.333479	0.602169	1.44597	378	18	S100A12 NFKB2 NFKBIA RIPK3 SAA1 RELA NFKBIB RIPK1 TLR3 S100B AGER TICAM1 IKBKB	c2.cp
REACTOME_EXTRACELLULAR_MATRIX_ORGANIZATION	0.0583708	0.333479	0.430503	1.34195	454	78	SERPINH1 MMP8 CTRB1 COL2A1 ADAMTS14 MMP7 COL4A5 MMP3 TIMP1 MMP9 COL9A2 COL1A1 MMP1 COL4A1 PLOD3 MMP14 TPSAB1 COL4A2 COL9A3 ELANE PLOD1 COL16A1 MMP11 ADAMTS2 COL27A1 COL6A2 BMP1 COL4A4 PPIB	c2.cp
REACTOME_ENERGY_DEPENDENT_REGULATION_OF_MTOR_BY_LKB1_AMPK	0.0568215	0.333479	-0.562541	-1.47517	196	17	PRKAA2 PRKAA1 PPM1A CAB39L PRKAG2 CAB39	c2.cp
REACTOME_GABA_SYNTHESIS_RELEASE_REUPTAKE_AND_DEGRADATION	0.0571099	0.333479	-0.562258	-1.47443	197	17	GAD2 SLC32A1 SLC6A1 GAD1 SLC6A11 ALDH5A1 VAMP2 SNAP25 ABAT DNAJC5	c2.cp
ST_P38_MAPK_PATHWAY	0.0622803	0.349908	0.502038	1.39066	442	37	HSPB1 DUSP1 GADD45A MAPKAPK2 CREB5 DUSP10 IL1R1 MAP2K3 MKNK2 MAPK13	c2.cp
PID_IL3_PATHWAY	0.0620761	0.349908	0.551525	1.41967	420	25	OSM CISH CEBPB STAT5A PIM1 ID1 CSF2RB INPP5D IL3RA HDAC1 GAB2 CNKSR1	c2.cp
PID_P38_ALPHA_BETA_DOWNSTREAM_PATHWAY	0.0621667	0.349908	0.49853	1.38799	442	38	HSPB1 JUN PTGS2 CEBPB DDIT3 EIF4EBP1 MAPKAPK2	c2.cp
BIOCARTA_ACH_PATHWAY	0.0626609	0.350164	-0.560599	-1.44991	218	16	FASLG CHRNG	c2.cp
REACTOME_VOLTAGE_GATED_POTASSIUM_CHANNELS	0.0635653	0.353329	-0.425804	-1.37522	178	41	KCND2 KCNA4 KCNA2 KCNAB1 KCNA7 KCNH5 KCNV1 KCNS3 KCNQ5 KCNH7 KCNQ4 KCNC2 KCNQ3 KCNS2 KCNB2 KCNG3 KCNC3 KCNB1 KCNH6 KCNA3 KCNAB3 KCNQ2 KCND1 KCNA1 KCNH4	c2.cp
KEGG_METABOLISM_OF_XENOBIOTICS_BY_CYTOCHROME_P450	0.0641026	0.35443	-0.396158	-1.33884	169	51	ADH1C GSTM1 AKR1C4 ALDH3A1 UGT2A1 CYP2C18 UGT2B15 CYP3A43 GSTA1 CYP2C8 GSTM5 UGT1A7 ALDH1A3	c2.cp
PID_TAP63_PATHWAY	0.0653727	0.35955	0.457752	1.35057	484	54	EGR2 CDKN1A ADA GADD45A VDR ITGB4 GDF15 CDKN2A SERPINB5 S100A2 TRAF4 TP53I3 GPX2 CLCA2 AEN DHRS3 FAS BBC3 JAG1 PML SP1 ABL1 IGFBP3 HBP1 SMARCD3 BAX	c2.cp
PID_GLYPICAN_1PATHWAY	0.0672515	0.367179	0.535567	1.39998	459	27	PLA2G2A TGFB1 HCK FLT1 FGR SERPINC1 VEGFA LYN TGFB3 LCK	c2.cp
PID_HIF2PATHWAY	0.0674626	0.367179	0.516599	1.3918	468	32	SERPINE1 EFNA1 EPO FLT1 ETS1 VEGFA MMP14 SLC2A1 BHLHE40 EGLN3 CITED2 SP1 POU5F1	c2.cp
BIOCARTA_P53HYPOXIA_PATHWAY	0.0703382	0.378884	0.560327	1.40594	469	22	HSPA1A CDKN1A GADD45A HIC1 NFKBIB HSP90AA1 IGFBP3 BAX	c2.cp
PID_P38_MKK3_6PATHWAY	0.0700805	0.378884	0.537973	1.3975	478	26	GADD45B GADD45G GADD45A MAP2K3 MAP3K6	c2.cp
BIOCARTA_GLEEVEC_PATHWAY	0.071482	0.38307	0.553899	1.3981	477	23	FOS JUN MYC STAT5A	c2.cp
PID_REELIN_PATHWAY	0.0729669	0.383378	-0.459604	-1.37661	226	29	RELN GRIN2B LRP8 GRIN2A MAP1B GSK3B PIK3CA CDK5R1 PAFAH1B1	c2.cp
REACTOME_BASIGIN_INTERACTIONS	0.0729873	0.383378	0.541143	1.39294	494	25	SLC16A3 MAG MMP1 PPIAP22 SLC7A7 SLC7A9 BSG SPN SLC7A5 SLC16A8 ATP1B3 ITGB1	c2.cp
REACTOME_UNBLOCKING_OF_NMDA_RECEPTOR_GLUTAMATE_BINDING_AND_ACTIVATION	0.073007	0.383378	-0.56286	-1.43627	260	15	GRIA2 GRIN2B CAMK2D GRIN2A GRIA4 GRIA3 GRIN2D AKAP9	c2.cp
NABA_ECM_AFFILIATED	0.0722131	0.383378	0.375156	1.26306	617	153	LGALS12 SFTPA1 MUC22 CLEC5A C1QA C1QB CLEC18C SEMA3B CLEC2B C1QC LGALS16 SEMA3F PLXNB3 LGALS9 MUC1 MUC17 FCN3 CLEC1B LGALS3 C1QL4 ANXA2 PLXNB1 FCN1 CLEC4E LMAN1L LGALS4 ANXA5 CLEC7A LGALS9C COLEC11 ANXA8 CLEC18B SEMA4D ANXA9 C1QTNF5 SEMA6A MUC16 CLEC1A MUC4 C1QTNF1 CLEC3A SEMA4C SDC4 SFTPC ANXA3 CLEC19A CLEC4C CLEC17A PLXDC2 C1QL2	c2.cp
KEGG_GRAFT_VERSUS_HOST_DISEASE	0.0740794	0.385139	0.510452	1.37524	514	32	IL1B CD80 CD86 HLA-DRA HLA-DRB5 IL6 HLA-C HLA-DQA1 HLA-DRB1 HLA-DQB1 HLA-DPA1 HLA-G TNF HLA-DQA2 IL1A HLA-DPB1 HLA-DOA HLA-DOB HLA-E HLA-DMA	c2.cp
NABA_PROTEOGLYCANS	0.0737463	0.385139	-0.455005	-1.38299	224	31	NYX ESM1 OGN ASPN OPTC LUM HAPLN1 IMPG1	c2.cp
PID_FOXM1_PATHWAY	0.0752915	0.388364	0.486114	1.35848	535	39	FOS ONECUT1 MYC CDK2 CENPA CDKN2A NFATC3 TGFA CCNB2 CHEK2 SP1 CENPB	c2.cp
REACTOME_REGULATION_OF_GENE_EXPRESSION_IN_BETA_CELLS	0.0754572	0.388364	0.604661	1.41713	490	16	FOXA3 MAFA NKX2-2 PAX6 FOXO1	c2.cp
REACTOME_TRAF6_MEDIATED_INDUCTION_OF_NFKB_AND_MAP_KINASES_UPON_TLR7_8_OR_9_ACTIVATION	0.0758146	0.388364	0.423296	1.31083	583	75	FOS S100A12 JUN NFKB2 NOD2 TLR8 NFKBIA RPS6KA1 MAPKAPK2 MAP2K3 MYD88 SAA1 RIPK2 IRAK2 RELA TMEM189-UBE2V1 NFKBIB DUSP6 PELI1 RPS27A IRAK4 NOD1 S100B MAPK7 PPP2R1B AGER	c2.cp
BIOCARTA_FCER1_PATHWAY	0.0774628	0.394871	0.485999	1.3531	551	38	FOS FCER1G JUN NFATC1 BTK SYK NFATC3 LYN NFATC2 VAV1	c2.cp
KEGG_REGULATION_OF_AUTOPHAGY	0.0790639	0.401076	-0.46495	-1.36941	249	27	IFNA8 IFNA4 IFNA6 PRKAA2 PRKAA1 IFNA1 ATG7 ATG12	c2.cp
BIOCARTA_IL6_PATHWAY	0.0797665	0.402686	0.55275	1.38693	532	22	FOS JUN IL6 CEBPB IL6R STAT3	c2.cp
ST_DIFFERENTIATION_PATHWAY_IN_PC12_CELLS	0.0826423	0.415198	0.470959	1.33928	597	43	EGR4 EGR2 EGR1 JUN GAST CREB5	c2.cp
REACTOME_NFKB_AND_MAP_KINASES_ACTIVATION_MEDIATED_BY_TLR4_SIGNALING_REPERTOIRE	0.0842997	0.421498	0.423204	1.30174	646	70	FOS S100A12 CD14 JUN NFKB2 NOD2 NFKBIA RPS6KA1 MAPKAPK2 MAP2K3 SAA1 RIPK2 IRAK2 RELA NFKBIB DUSP6 RPS27A RIPK1 TLR3 NOD1 S100B MAPK7 PPP2R1B AGER	c2.cp
KEGG_BLADDER_CANCER	0.086774	0.429757	0.475321	1.33317	619	40	TYMP CDKN1A THBS1 MYC MMP9 CDKN2A MMP1 VEGFA CDH1 RASSF1 DAPK2	c2.cp
PID_PTP1B_PATHWAY	0.0867555	0.429757	0.452439	1.32078	637	50	SOCS3 ITGB3 FCGR2A PRL HCK STAT5A CSF1 FGR CSF1R LYN LCK DOK1 STAT3 YBX1 LEP BCAR1	c2.cp
REACTOME_ANTIGEN_PROCESSING_CROSS_PRESENTATION	0.0877808	0.432693	0.418609	1.29208	675	72	FCGR1A NCF2 FCGR1B HLA-C CYBA PSMB9 HLA-G NCF4 MRC1 TAP1 PSMB8 CTSS HLA-B CYBB CALR HLA-F RPS27A ITGB5 PSMB10 PSME1 PSMC4 PDIA3 HLA-A SEC61B PSMD13 PSMB1 UBA52 PSME2 B2M PSMD9 PSMC5 PSMB5 PSMB4 PSMD6 PSMB6 PSMC3 PSME4 PSMD4 PSMB3 PSMB7 PSMF1 SEC61A1 PSMA2 PSMD8 PSMD3	c2.cp
KEGG_ALPHA_LINOLENIC_ACID_METABOLISM	0.0903817	0.439135	0.575027	1.3808	591	18	PLA2G2E PLA2G2A PLA2G12B PLA2G1B PLA2G4E PLA2G4B PLA2G3 FADS2 PLA2G2C	c2.cp
KEGG_FC_EPSILON_RI_SIGNALING_PATHWAY	0.0908737	0.439135	0.416287	1.28913	699	75	PLA2G2E PLA2G2A FCER1G RAC2 PLA2G12B PIK3R5 PLA2G1B BTK TNF SYK PLA2G4E MAP2K3 LYN VAV1 INPP5D PLA2G4B MAPK13 IL5 PLA2G3 LCP2	c2.cp
BIOCARTA_NO2IL12_PATHWAY	0.0903642	0.439135	0.592733	1.38917	587	16	CD3D CXCR3 CCR5 CD3G CD4 IL12A TYK2	c2.cp
REACTOME_GLUTAMATE_NEUROTRANSMITTER_RELEASE_CYCLE	0.0911888	0.439135	-0.549686	-1.40265	325	15	SLC1A7 SLC1A1 VAMP2 SNAP25 GLS SYT1 STXBP1 SLC1A6 STX1A UNC13B	c2.cp
REACTOME_DESTABILIZATION_OF_MRNA_BY_AUF1_HNRNP_D0	0.090563	0.439135	0.451004	1.31659	665	50	HSPA1B HSPB1 PSMB9 PSMB8 RPS27A PSMB10 PSME1 PSMC4 PSMD13 PSMB1 UBA52 PABPC1 PSME2 PSMD9 PSMC5 PSMB5 PSMB4 PSMD6 PSMB6 PSMC3 PSME4 PSMD4 PSMB3 PSMB7 PSMF1 EIF4G1 PSMA2 PSMD8 PSMD3 HNRNPD	c2.cp
BIOCARTA_TCR_PATHWAY	0.0927152	0.444438	0.461433	1.31702	671	44	CD3D FOS JUN NFATC1 NFKBIA CD3G NFATC3 NFATC2 VAV1 RELA LCK PTPN7 NFATC4 NFKB1 PIK3CG PLCG1 ZAP70 PPP3CC	c2.cp
BIOCARTA_CARDIACEGF_PATHWAY	0.0946565	0.447584	0.572152	1.37389	619	18	FOS JUN MYC RELA AGT EDNRA NFKB1 PLCG1	c2.cp
PID_LYSOPHOSPHOLIPID_PATHWAY	0.0946302	0.447584	0.426292	1.29633	718	65	FOS JUN IL6 NFKBIA HBEGF MMP9 PXN LYN RELA PLCB3 TRIP6 PLD2 LPAR1 ARHGEF1 GNA13 BCAR1 NFKB1 GNA15 SLC9A3R2 PLCG1 GAB1	c2.cp
REACTOME_INTERACTION_BETWEEN_L1_AND_ANKYRINS	0.094384	0.447584	-0.503361	-1.38186	320	20	SCN5A SCN2A NRCAM SCN8A ANK1 SCN1B ANK3 SCN2B KCNQ3 SCN7A SPTBN2	c2.cp
REACTOME_PLATELET_AGGREGATION_PLUG_FORMATION	0.0958904	0.451376	0.489178	1.3324	671	34	ADRA2B ITGB3 FGB APBB1IP SYK GP1BB TLN1 RAPGEF3 VWF BCAR1 GP1BA GP5 ITGA2B F2 GP9 ADRA2A CSK PTPN1	c2.cp
PID_TXA2PATHWAY	0.0967612	0.451741	0.440057	1.30275	719	55	ICAM1 NOS3 PIK3R6 HCK PIK3R5 FGR SYK TGM2 PTGIR SELE LYN LCK ARHGEF1 SLC9A3R1 PLCB2 GNA13	c2.cp
REACTOME_DARPP_32_EVENTS	0.0968326	0.451741	-0.479079	-1.35715	320	23	PPP3CA PRKAR2B PRKACB PRKAR1A PPP3CB PPP2CB PPP3R1 CALM1 PPP2CA PRKAR2A CALM3 CALM2 PRKACA PPP2R5D	c2.cp
BIOCARTA_STRESS_PATHWAY	0.103657	0.481241	0.519553	1.33737	702	25	JUN LTA NFKBIA TNF MAP2K3 RELA TNFRSF1A NFKB1 RIPK1 TRADD CASP2	c2.cp
REACTOME_TRANSPORT_TO_THE_GOLGI_AND_SUBSEQUENT_MODIFICATION	0.104077	0.481241	-0.426247	-1.31482	313	33	B4GALT6 MGAT4C MAN1A1 SEC23A MAN1A2 ST8SIA6 MANEA MCFD2 ST8SIA2 LMAN1 MGAT4A MGAT3	c2.cp
PID_P38_MK2_PATHWAY	0.109523	0.504192	0.539234	1.34048	727	21	SFN HSPB1 LSP1 MAPKAPK2	c2.cp
REACTOME_ER_PHAGOSOME_PATHWAY	0.111215	0.509735	0.426908	1.27905	833	59	HLA-C PSMB9 HLA-G TAP1 PSMB8 HLA-B CALR HLA-F RPS27A PSMB10 PSME1 PSMC4 PDIA3 HLA-A SEC61B PSMD13 PSMB1 UBA52 PSME2 B2M PSMD9 PSMC5 PSMB5 PSMB4 PSMD6 PSMB6 PSMC3 PSME4 PSMD4 PSMB3 PSMB7 PSMF1 SEC61A1 PSMA2 PSMD8 PSMD3	c2.cp
REACTOME_SIGNALING_BY_BMP	0.112651	0.514061	-0.477698	-1.33841	373	22	UBE2D1 NOG BMPR2 CHRDL1 ZFYVE16 SMAD5 BMPR1A ACVR2A ACVR2B UBE2D3 SMAD1 BMPR1B SMURF2	c2.cp
BIOCARTA_CDMAC_PATHWAY	0.114338	0.515761	0.57534	1.34841	743	16	FOS JUN MYC NFKBIA TNF RELA	c2.cp
SA_B_CELL_RECEPTOR_COMPLEXES	0.11511	0.515761	0.517704	1.3204	773	24	FOS JUN RPS6KA1 SYK LYN VAV1	c2.cp
PID_HDAC_CLASSI_PATHWAY	0.116478	0.515761	0.417054	1.26824	884	65	NFKBIA TNF MXD1 SAP30 RELA GATA1 TNFRSF1A PPARG MTA2 STAT3 SIRT2 ZFPM1 SIRT6 HDAC1 NFKB1 GATA2 SIRT7 SMAD7 HDAC7 SIRT4 NCOR2 HDAC10	c2.cp
REACTOME_FORMATION_OF_THE_TERNARY_COMPLEX_AND_SUBSEQUENTLY_THE_43S_COMPLEX	0.116053	0.515761	0.432494	1.27604	860	54	RPS28P7 RPS21 RPS4X RPS16 RPS27 RPS19 RPS11 RPS15 RPS28 RPS20 RPS12 RPS17 RPS24 RPS7 RPS27A RPS5 RPS25 EIF3G RPS10 FAU RPS13 RPS3 RPS6 RPS23 RPS15A RPS8 RPS14 RPS15P5 RPS2 RPS9 RPS18	c2.cp
REACTOME_CLASS_B_2_SECRETIN_FAMILY_RECEPTORS	0.116228	0.515761	0.403253	1.257	905	78	CALCA PTH2 GHRH ADM GIPR CALCB WNT11 GNG8 WNT3 IHH DHH SCT RAMP1 GNG5 GCGR PTH1R GNGT2	c2.cp
REACTOME_SEMA4D_IN_SEMAPHORIN_SIGNALING	0.11359	0.515761	0.494078	1.3175	783	30	RAC2 RHOG PLXNB1 PTPRC CD72 RND1 RHOC RRAS SEMA4D LIMK2 RHOB MYL6 MYH9	c2.cp
REACTOME_COMPLEMENT_CASCADE	0.11602	0.515761	0.507761	1.31901	792	26	C1QA C1QB CRP C1QC C4A C3 C9 CFD C2 C4BPB C7 CD55	c2.cp
REACTOME_UNFOLDED_PROTEIN_RESPONSE	0.11789	0.519812	0.404057	1.25419	911	76	ATF3 CCL2 LMNA DDIT3 ATF4P3 HSPA5 HERPUD1 XBP1 TLN1 SULT1A4 ATF4 DNAJB11 ACADVL CALR WIPI1 ERN1 ZBTB17 SULT1A3 EIF2AK3 HSP90B1 DDX11 CXXC1 TSPYL2	c2.cp
KEGG_TYPE_II_DIABETES_MELLITUS	0.121476	0.533371	0.451153	1.28296	878	43	MAFA SOCS3 SOCS1 HK2 PIK3R5 TNF SLC2A4 HK3	c2.cp
PID_ALPHA_SYNUCLEIN_PATHWAY	0.12313	0.538372	0.481488	1.29721	855	32	KLK6 HCK PLD1 FGR SYK LYN PLD2 LCK PLCB2	c2.cp
BIOCARTA_CREB_PATHWAY	0.125039	0.541984	-0.443231	-1.28984	395	26	PRKAR2B PRKACB PRKAR1A CAMK2D ADCY1 PRKCA PIK3CA MAPK1 CREB1 PRKCB SOS1 PIK3R1 MAPK14 PRKAR2A	c2.cp
ST_GRANULE_CELL_SURVIVAL_PATHWAY	0.124799	0.541984	0.502697	1.30586	852	26	FOS JUN CXCL2 CREB5 ITPKB	c2.cp
REACTOME_POST_NMDA_RECEPTOR_ACTIVATION_EVENTS	0.125953	0.541984	-0.414701	-1.2792	379	33	RPS6KA6 CAMK4 PRKACB GRIN2B CAMK2D ADCY1 GRIN2A MAPK1 CREB1 PDPK1 GRIN2D AKAP9 CALM1 RASGRF2 BRAF RPS6KA3	c2.cp
REACTOME_CHYLOMICRON_MEDIATED_LIPID_TRANSPORT	0.126031	0.541984	0.578939	1.33391	809	15	LDLR APOA5 LDLRAP1 APOE HSPG2 APOC2 LPL SDC1 APOA2 P4HB	c2.cp
REACTOME_TRAF6_MEDIATED_NFKB_ACTIVATION	0.127125	0.544449	0.527094	1.3103	844	21	S100A12 NFKB2 NFKBIA SAA1 RELA NFKBIB S100B AGER RNF135 IKBKB	c2.cp
REACTOME_SIGNALING_BY_TGF_BETA_RECEPTOR_COMPLEX	0.128735	0.549096	0.418823	1.25674	964	60	SERPINE1 PPP1R15A JUNB MYC TGFB1 TGIF1 F11R	c2.cp
REACTOME_ACTIVATION_OF_THE_MRNA_UPON_BINDING_OF_THE_CAP_BINDING_COMPLEX_AND_EIFS_AND_SUBSEQUENT_BINDING_TO_43S	0.131017	0.556556	0.415703	1.25455	987	62	RPS28P7 EIF4EBP1 RPS21 RPS4X RPS16 RPS27 RPS19 RPS11 RPS15 RPS28 RPS20 RPS12 RPS17 RPS24 RPS7 RPS27A RPS5 RPS25 EIF3G RPS10 FAU EIF4A1 RPS13 RPS3 RPS6 RPS23 RPS15A RPS8 RPS14 RPS15P5 RPS2 RPS9 RPS18	c2.cp
PID_ANTHRAX_PATHWAY	0.131905	0.55806	0.556299	1.31924	861	17	IL1B TNF MAP2K3 IL18 CASP1	c2.cp
BIOCARTA_BCR_PATHWAY	0.135131	0.564849	0.467297	1.2728	946	34	FOS JUN NFATC1 BTK SYK NFATC3 LYN NFATC2 VAV1	c2.cp
PID_RB_1PATHWAY	0.134392	0.564849	0.411708	1.24822	1015	64	GSC CDKN1A JUN SPI1 MYOD1 CEBPD CEBPB CKM CDK2 CDKN2A CEBPA PPARG ELF1	c2.cp
REACTOME_SIGNALING_BY_SCF_KIT	0.134897	0.564849	0.399036	1.23523	1040	74	NR4A1 CDKN1A PTPN6 SOCS1 GRAP2 STAT5A TEC MMP9 GRAP LYN VAV1 FES GRB7 LCK SH2B3 STAT3 FOXO4 GAB2 SH2B2 RPS6KB2 FOXO1 PHLPP1	c2.cp
BIOCARTA_MTA3_PATHWAY	0.135725	0.565071	0.547584	1.3149	888	18	HSPB1 SNAI1 TUBA1C SNAI2 CDH1 HDAC1 HSPB2 MTA1 CTSD	c2.cp
KEGG_GALACTOSE_METABOLISM	0.13639	0.565587	0.502388	1.29319	924	25	HK2 GLA LCT B4GALT1 MGAM HK3 GALK1 PFKL PFKP GALE PGM2 GALK2	c2.cp
BIOCARTA_ATM_PATHWAY	0.138335	0.56601	0.5374	1.30401	908	19	CDKN1A JUN NFKBIA GADD45A RELA CHEK2 NFKB1 ABL1 BRCA1 RBBP8	c2.cp
BIOCARTA_FMLP_PATHWAY	0.137113	0.56601	0.46476	1.27275	964	35	FPR1 NCF2 NFATC1 NFKBIA NCF1C NFATC3 MAP2K3 NFATC2 RELA NFATC4 NFKB1 GNA15 PPP3CC	c2.cp
BIOCARTA_INTRINSIC_PATHWAY	0.138312	0.56601	0.52996	1.30225	912	20	COL4A5 FGB COL4A1 SERPINC1 COL4A2 F11 COL4A4 KLKB1 SERPING1	c2.cp
ST_T_CELL_SIGNAL_TRANSDUCTION	0.138659	0.56601	0.439805	1.25529	1004	44	CD3D NFKB2 GRAP2 NFKBIA RASGRP4 ITPKB PTPRC RASGRP3 VAV1 NFKBIE LCK LCP2 NFKBIB NFKB1 PLCG1 ZAP70 PRDX1 DTYMK TONSL ITPKA	c2.cp
PID_CD40_PATHWAY	0.139312	0.566464	0.485674	1.28776	959	29	JUN MYC NFKBIA TNFAIP3 STAT5A CD40 RELA BIRC3 TRAF1 NFKB1	c2.cp
REACTOME_IL_3_5_AND_GM_CSF_SIGNALING	0.139958	0.566884	0.449974	1.26208	999	40	PTPN6 CSF2RA HCK IL5RA STAT5A TEC SYK CSF2RB LYN VAV1 IL5 IL3RA GAB2 IL2RG INPPL1	c2.cp
REACTOME_NUCLEOTIDE_BINDING_DOMAIN_LEUCINE_RICH_REPEAT_CONTAINING_RECEPTOR_NLR_SIGNALING_PATHWAYS	0.140616	0.567352	0.437195	1.25197	1021	45	NOD2 TNFAIP3 P2RX7 RIPK2 IRAK2 PSTPIP1 CASP4 BIRC3 MAPK13 CASP1 TMEM189-UBE2V1 CARD9 AIM2 NLRP3 PYCARD TXNIP NOD1 CASP2 CASP9 MEFV IKBKB HSP90AB1 TAB2 TRAF6 NLRP1 BCL2L1	c2.cp
PID_PDGFRB_PATHWAY	0.141396	0.568303	0.362889	1.1976	1174	128	SFN FOS ITGB3 SPHK1 JUN PIK3R6 MYC HCK SLA PIK3R5 MYOCD STAT5A SIPA1 JUND FGR LYN DNM2 ARPC1B WASF2 LCK SLC9A3R1 DOK1 IQGAP1 STAT3 ARAP1	c2.cp
REACTOME_INTEGRIN_ALPHAIIB_BETA3_SIGNALING	0.143321	0.573831	0.497951	1.28177	971	25	ITGB3 FGB APBB1IP SYK TLN1 RAPGEF3 VWF BCAR1	c2.cp
PID_PRL_SIGNALING_EVENTS_PATHWAY	0.145058	0.578569	0.508583	1.28371	969	23	CDKN1A EGR1 CDK2 RHOC AGT BCAR1 ITGB1 PTP4A3 PTP4A2 RABGGTB ITGA1 ROCK1	c2.cp
PID_P38_ALPHA_BETA_PATHWAY	0.146598	0.580069	0.475276	1.27517	1018	31	DUSP1 HCK FGR DUSP10 MAP2K3 LYN DUSP16 LCK RIPK1	c2.cp
PID_TCR_CALCIUM_PATHWAY	0.146254	0.580069	0.508136	1.28258	977	23	FOS JUNB FOSL1 JUN PTGS2 NFATC1 NFATC3 NFATC2	c2.cp
REACTOME_FORMATION_OF_TUBULIN_FOLDING_INTERMEDIATES_BY_CCT_TRIC	0.147099	0.580069	0.525197	1.29055	970	20	TUBA1C TUBB6 TUBB2A TUBB4B TUBA3D TUBB2B TUBB1 CCT3 TUBA4A TCP1 TUBB3 TUBA1A CCT5 TUBA1B CCT7	c2.cp
BIOCARTA_LAIR_PATHWAY	0.148917	0.585029	0.554196	1.29886	968	16	ICAM1 ITGB2 IL6 C3 TNF IL1A ITGAL C7	c2.cp
REACTOME_SEMAPHORIN_INTERACTIONS	0.150039	0.587233	0.403613	1.22736	1139	65	TYROBP RAC2 RHOG TREM2 PLXNB3 PLXNB1 PTPRC CD72 RND1 RHOC FES RRAS SEMA4D TLN1 SEMA6A LIMK2 RHOB MYL6 MYH9 PLXNA3	c2.cp
BIOCARTA_KERATINOCYTE_PATHWAY	0.151615	0.589699	0.431296	1.23923	1102	46	FOS HOXA7 TNFRSF1B JUN NFKBIA TNF ETS1 MAP2K3 RELA CEBPA TNFRSF1A MAPK13 FAS NFKB1 RIPK1	c2.cp
REACTOME_POST_CHAPERONIN_TUBULIN_FOLDING_PATHWAY	0.151798	0.589699	0.54391	1.28986	991	17	TUBA1C TUBB6 TUBB2A TBCB TUBB4B TUBA3D TBCE TUBB2B TUBB1 TUBA4A TBCD TUBB3 TUBA1A TBCA TUBA1B	c2.cp
PID_INTEGRIN_CS_PATHWAY	0.153328	0.593438	0.487215	1.26564	1047	26	ITGB3 ITGAX ITGB2 ITGA5 ITGAM ITGB4 ITGA10 ITGA2 ITGAL ITGB7 ITGB5 ITGA11 ITGB1 ITGA6 ITGA2B ITGA7	c2.cp
REACTOME_EFFECTS_OF_PIP2_HYDROLYSIS	0.156863	0.604877	-0.443025	-1.25502	519	23	DGKK DGKB DGKH RASGRP1 TRPC3 DGKI PRKCE TRPC6 DAGLA	c2.cp
BIOCARTA_TOB1_PATHWAY	0.159674	0.613454	0.548938	1.28653	1038	16	CD3D TGFB1 CD3G TOB1 TOB2 TGFB3	c2.cp
PID_KIT_PATHWAY	0.166055	0.635631	0.41574	1.21897	1220	52	STAP1 PTPN6 SOCS1 GRAP2 EPO STAT5A TEC LYN VAV1 SNAI2 EPOR DOK1 SH2B3 STAT3 PIK3C2B	c2.cp
SA_TRKA_RECEPTOR	0.1671	0.637298	0.536551	1.27241	1091	17	NGFR CDKN1A NGF	c2.cp
KEGG_AUTOIMMUNE_THYROID_DISEASE	0.169569	0.638585	0.430953	1.22551	1226	43	CD80 CD86 HLA-DRA HLA-DRB5 HLA-C IFNA10 HLA-DQA1 IL10 TSHB HLA-DRB1 HLA-DQB1 HLA-DPA1 HLA-G HLA-DQA2 IFNA13 HLA-DPB1 CD40 HLA-DOA HLA-DOB HLA-E HLA-DMA IL5	c2.cp
KEGG_PRIMARY_IMMUNODEFICIENCY	0.168798	0.638585	0.450216	1.23292	1187	35	CD3D ADA IGLL1 BTK PTPRC CD40 TAP1 CIITA LCK CD4 IL2RG RFXANK ZAP70 RAG1	c2.cp
PID_NFKAPPAB_CANONICAL_PATHWAY	0.169882	0.638585	0.495213	1.24997	1135	23	NOD2 NFKBIA TNFAIP3 TNF RIPK2 RELA TNFRSF1A NFKB1 MALT1 BCL10 IKBKB	c2.cp
PID_ILK_PATHWAY	0.169785	0.638585	0.427033	1.22287	1233	45	SNAI1 JUN PARVG PPP1R14A RHOG PXN TNS1 LIMS1 IQGAP1 CDC37 HSP90AA1 AURKA ZYX ILK PPP1R14B	c2.cp
PID_RXR_VDR_PATHWAY	0.170593	0.638958	0.480092	1.24714	1165	26	NR4A1 TGFB1 VDR SREBF1 TNF PPARG	c2.cp
KEGG_BUTANOATE_METABOLISM	0.175671	0.653297	-0.394151	-1.21582	529	33	HMGCS2 AKR1B10 GAD2 ACSM4 EHHADH GAD1 ALDH5A1 L2HGDH ABAT	c2.cp
REACTOME_FORMATION_OF_FIBRIN_CLOT_CLOTTING_CASCADE	0.175439	0.653297	0.474234	1.23966	1199	27	PF4 FGB THBD SERPINC1 GP1BB F11 VWF GP1BA KLKB1 SERPING1 GP5 F3 F2 GP9 PROC F13A1 TFPI C1QBP	c2.cp
REACTOME_CROSS_PRESENTATION_OF_SOLUBLE_EXOGENOUS_ANTIGENS_ENDOSOMES	0.176357	0.653523	0.423263	1.21615	1282	46	FCGR1A FCGR1B PSMB9 MRC1 PSMB8 PSMB10 PSME1 PSMC4 PSMD13 PSMB1 PSME2 PSMD9 PSMC5 PSMB5 PSMB4 PSMD6 PSMB6 PSMC3 PSME4 PSMD4 PSMB3 PSMB7 PSMF1 PSMA2 PSMD8 PSMD3	c2.cp
REACTOME_ADAPTIVE_IMMUNE_SYSTEM	0.178845	0.660399	0.30466	1.11183	1727	496	CD3D PDCD1 CD80 NR4A1 UBE2C SOCS3 CD86 FCGR1A ASB15 CDKN1A ICOSLG PTPN6 SOCS1 ICAM1 TYROBP FCGR3A LILRB3 LILRB4 GRAP2 ITGB2 LILRB1 NCF2 HLA-DRB5 FCGR1B ICAM2 HLA-C HCST CD74 NFKBIA HLA-DQA1 IFITM1 C3 CYBA BTK SIPA1 HLA-DRB1 PSMB9 CD3G WAS SPSB1 VASP HLA-DPA1 HLA-G SELL SYK ITPR3 HLA-DQA2 PTPRC PIK3AP1 NCF4 CTSH RASGRP3 HLA-DPB1 CD40 LILRB2 MAP3K8 HSPA5 HLA-DOA MRC1 ORAI1 RIPK2 LYN VAV1 DNM2 TAP1 …	c2.cp
KEGG_STARCH_AND_SUCROSE_METABOLISM	0.182102	0.667647	-0.373037	-1.19351	524	39	GBA3 SI UGT2A1 AMY2A AGL UGT2B15 G6PC2 PGM2L1 UGT1A7	c2.cp
BIOCARTA_CELLCYCLE_PATHWAY	0.182294	0.667647	0.49024	1.23741	1218	23	CDKN1A CDK2 CDKN2A CDKN2C	c2.cp
BIOCARTA_IL2RB_PATHWAY	0.182992	0.667647	0.436047	1.21403	1303	38	FOS SOCS3 PTPN6 SOCS1 MYC STAT5A SYK	c2.cp
REACTOME_CD28_CO_STIMULATION	0.184002	0.667647	0.459672	1.23331	1278	31	CD80 CD86 GRAP2 MAP3K8 LYN VAV1 LCK	c2.cp
REACTOME_TRANSCRIPTIONAL_REGULATION_OF_WHITE_ADIPOCYTE_DIFFERENTIATION	0.183533	0.667647	0.387496	1.19407	1410	71	EGR2 FABP4 ANGPTL4 TGFB1 CEBPD CEBPB KLF4 SREBF1 PCK1 TNF SLC2A4 RELA PPARG MED26	c2.cp
BIOCARTA_CD40_PATHWAY	0.184845	0.668385	0.546705	1.25964	1187	15	DUSP1 NFKBIA TNFAIP3 CD40 RELA NFKB1	c2.cp
BIOCARTA_TID_PATHWAY	0.185496	0.668426	0.519843	1.24829	1214	18	HSPA1A TNFRSF1B NFKBIA USH1C TNF RELA TNFRSF1A NFKB1 TAX1BP3	c2.cp
PID_NFKAPPAB_ATYPICAL_PATHWAY	0.189441	0.675653	0.525381	1.24592	1237	17	NFKBIA SYK RELA REL BCL3 LCK NFKB1 ARRB2 IKBKB CSNK2B	c2.cp
REACTOME_DEFENSINS	0.189202	0.675653	0.544868	1.25541	1215	15	DEFA1B DEFA4 DEFA1 CCR2 DEFA5 TLR2 TLR1 DEFA3 CD4	c2.cp
REACTOME_PKA_MEDIATED_PHOSPHORYLATION_OF_CREB	0.189127	0.675653	-0.480888	-1.24375	660	16	PRKAR2B PRKACB PRKAR1A ADCY1 CREB1	c2.cp
BIOCARTA_NFAT_PATHWAY	0.190781	0.678114	0.411183	1.20035	1402	50	NKX2-5 LIF GATA4 HAND1 ACTA1 NFATC1 HBEGF NFATC3 NFATC2 AGT	c2.cp
KEGG_PPAR_SIGNALING_PATHWAY	0.193345	0.678909	0.387083	1.18215	1469	67	OLR1 FABP4 ANGPTL4 UCP1 SLC27A6 SCD ACSL5 APOA5 PCK1 UBC CYP27A1 ACSL1 MMP1 DBI	c2.cp
BIOCARTA_P53_PATHWAY	0.194252	0.678909	0.531936	1.24668	1263	16	CDKN1A GADD45A CDK2	c2.cp
PID_INTEGRIN_A4B1_PATHWAY	0.194073	0.678909	0.456052	1.22359	1348	31	SPP1 THBS1 CD14 ADAM28 PXN THBS2 TLN1 DOCK1 BCAR1	c2.cp
REACTOME_ACYL_CHAIN_REMODELLING_OF_PG	0.19278	0.678909	0.542909	1.25089	1238	15	PLA2G2E PLA2G2A PLA2G1B PLA2G3	c2.cp
REACTOME_P53_DEPENDENT_G1_DNA_DAMAGE_RESPONSE	0.192771	0.678909	0.405668	1.19319	1423	53	CDKN1A CDK2 PSMB9 CCNE2 PSMB8 RPS27A PSMB10 PSME1 PSMC4 PSMD13 PSMB1 UBA52 PSME2 PSMD9 PSMC5 PSMB5 PSMB4 RFWD2 PSMD6 PSMB6 PSMC3 PSME4 PSMD4 TP53 PSMB3 PSMB7 PSMF1 PSMA2 PSMD8 PSMD3	c2.cp
REACTOME_BRANCHED_CHAIN_AMINO_ACID_CATABOLISM	0.19527	0.680189	-0.46916	-1.23029	676	17	DLD DBT BCKDHA BCKDHB ACADSB BCAT1	c2.cp
BIOCARTA_AMI_PATHWAY	0.196336	0.681631	0.515168	1.23706	1285	18	AHSP COL4A5 FGB COL4A1 SERPINC1 COL4A2 COL4A4 PLAT	c2.cp
PID_VEGFR1_2_PATHWAY	0.198427	0.686611	0.383964	1.17752	1513	69	SH2D2A ITGB3 PTPN6 NOS3 FLT1 MAPKAPK2 PXN MAP2K3 VEGFA SHB DNM2 FES CDH5 MYOF IQGAP1 CTNNA1	c2.cp
REACTOME_SEMA4D_INDUCED_CELL_MIGRATION_AND_GROWTH_CONE_COLLAPSE	0.200531	0.6916	0.473016	1.21758	1359	25	RAC2 RHOG PLXNB1 RND1 RHOC SEMA4D LIMK2 RHOB MYL6 MYH9	c2.cp
REACTOME_DAG_AND_IP3_SIGNALING	0.20315	0.698329	-0.397271	-1.18991	631	29	CAMK4 PRKAR2B PRKACB PRKAR1A ADCY1 PRKCA CREB1 PRKCE PDE1B CALM1 PDE1A	c2.cp
ST_PHOSPHOINOSITIDE_3_KINASE_PATHWAY	0.204133	0.699407	0.433136	1.1998	1451	37	SFN NR4A3 BTK RPS6KA1 CDKN2A DAPP1 INPP5D	c2.cp
PID_E2F_PATHWAY	0.207205	0.707611	0.377438	1.16837	1598	74	SERPINE1 CDKN1A MYC CES1P1 TYMS CDK2 TK1 CDKN2A HIC1 CCNE2 CDKN2C MCL1 CEBPA PLAU E2F7 HDAC1 CASP7 UXT SP1 TRIM28 DHFR POLA1 HBP1 MYBL2 BRCA1 KAT2A RBBP8	c2.cp
PID_S1P_S1P1_PATHWAY	0.208816	0.708483	0.490364	1.21899	1387	21	ITGB3 SPHK1 PTGS2 VEGFA PLCB2 PLCG1 PDGFRB S1PR1 KDR PDGFB GNAI2	c2.cp
REACTOME_NOD1_2_SIGNALING_PATHWAY	0.208201	0.708483	0.454044	1.21075	1436	30	NOD2 TNFAIP3 RIPK2 IRAK2 CASP4 BIRC3 MAPK13 CASP1 TMEM189-UBE2V1 CARD9 NOD1 CASP2 CASP9	c2.cp
REACTOME_ANTIGEN_PRESENTATION_FOLDING_ASSEMBLY_AND_PEPTIDE_LOADING_OF_CLASS_I_MHC	0.209719	0.709243	0.490078	1.21828	1393	21	HLA-C HLA-G HSPA5 TAP1 HLA-B CALR HLA-F SEC13 PDIA3 HLA-A SEC24D B2M SEC24C	c2.cp
BIOCARTA_HIF_PATHWAY	0.211918	0.711724	0.533646	1.22955	1361	15	JUN NOS3 EPO VEGFA HSP90AA1 P4HB LDHA ARNT EDN1	c2.cp
BIOCARTA_IL2_PATHWAY	0.212427	0.711724	0.488976	1.21554	1411	21	FOS JUN STAT5A SYK LCK IL2RG	c2.cp
ST_GAQ_PATHWAY	0.212573	0.711724	0.459167	1.20027	1453	27	PITX2 NFKB2 NFKBIA PLD1 ITPKB ITPR3 NFKBIE PLD2 NFKBIB NFKB1	c2.cp
PID_S1P_S1P3_PATHWAY	0.213177	0.711724	0.452644	1.20018	1468	29	CXCR4 ITGB3 FLT1 VEGFA GNA13 S1PR2 GNA15 S1PR3 PDGFRB GNA12 S1PR1	c2.cp
REACTOME_ACTIVATED_TAK1_MEDIATES_P38_MAPK_ACTIVATION	0.214996	0.715513	0.513739	1.21831	1404	17	NOD2 MAPKAPK2 MAP2K3 RIPK2 IRAK2 NOD1 TAB2 MAPKAPK3 TRAF6	c2.cp
KEGG_NEUROACTIVE_LIGAND_RECEPTOR_INTERACTION	0.216685	0.717903	-0.248926	-1.0673	199	255	DRD3 CHRNA9 HTR2C CCKAR PRLR PTGFR CHRNG CALCR GRPR CGA PTGER3 GLP1R GABRA4 LHCGR GABRA1 PTGDR P2RY14 GABRB2 FSHR HCRTR1 MCHR2 LPAR3 GLRA3 GRIA2 ADRB3 CHRNA2 P2RY13 DRD2 HTR2A NPY5R GLRA2 CHRNB3 HTR2B GABRG2 NMBR NPFFR2 GPR156 MC2R LEPR CALCRL CHRNA6 GABRA2 SSTR4 NPBWR1 GRIN2B P2RY4 GABRG1 HTR1D GLRB GABRA6 GHR ADRA1D THRB HTR4 CHRM2 MLNR GRIN2A GRIA4 TSHR PRLHR CHRNB2 GRM1 GRIK3 PLG GRIN3A ADRA1…	c2.cp
BIOCARTA_CSK_PATHWAY	0.217088	0.717903	0.491453	1.20763	1432	20	CD3D HLA-DRA HLA-DRB1 CD3G PTPRC LCK CD4	c2.cp
KEGG_CALCIUM_SIGNALING_PATHWAY	0.219147	0.722426	-0.266648	-1.08989	292	174	HTR2C CCKAR PTGFR GRPR PTGER3 LHCGR PLCB1 ERBB4 TNNC1 TRPC1 ADRB3 CAMK4 MYLK3 PPP3CA ATP2B1 HTR2A HTR2B ITPR1 PDGFRA PRKACB CAMK2D ADCY1 PLCZ1 ADRA1D HTR4 PRKCA PPP3CB CHRM2 GRIN2A NOS1 GNAL ATP2B2 GRM1 ADRA1A GNAQ RYR2 SLC8A1 DRD1 ADORA2A PLN PLCB4 ATP2A2 HTR6 PRKCB TACR1 CACNA1S GRIN2D PPP3R1 F2R CACNA1D CHRNA7 SLC8A3	c2.cp
BIOCARTA_EIF4_PATHWAY	0.221782	0.727297	-0.414701	-1.18747	726	24	EIF4E GHR PRKCA PTEN PIK3CA MAPK1 PRKCB PDPK1 EIF4G3 RPS6KB1 EIF4G2 PIK3R1 MAPK14 EIF4A2 IRS1 PDK2	c2.cp
PID_TNF_PATHWAY	0.223308	0.727297	0.410076	1.17431	1622	45	TNFRSF1B TNFAIP3 TNF MAP2K3 RELA SMPD2 TNFRSF1A BIRC3 RFFL TRAF1 MAP4K4 NFKB1 RIPK1 TRADD	c2.cp
PID_PDGFRA_PATHWAY	0.223409	0.727297	0.484299	1.20392	1484	21	FOS JUN SHB	c2.cp
REACTOME_LIPOPROTEIN_METABOLISM	0.222076	0.727297	0.455696	1.1912	1518	27	LDLR APOA5 LDLRAP1 AMN APOE HSPG2 SCARB1 ABCG1 PLTP BMP1 APOC2 LPL LCAT SDC1 APOA2 P4HB	c2.cp
PID_MTOR_4PATHWAY	0.227523	0.736104	0.375798	1.15248	1735	69	SFN DDIT4 SGK1 CDK2 SREBF1 PLD1 EIF4EBP1 RPS6KA1 PXN	c2.cp
PID_EPHA_FWDPATHWAY	0.227454	0.736104	0.433329	1.18028	1593	34	PIK3R6 EFNA1 HCK PIK3R5 FGR LYN EPHA2 EFNA2 LCK ARHGEF15 PIK3CG PLCG1 EPHA1	c2.cp
KEGG_LINOLEIC_ACID_METABOLISM	0.231698	0.747299	0.448258	1.18198	1591	28	PLA2G2E PLA2G2A PLA2G12B PLA2G1B PLA2G4E PLA2G4B CYP2J2 PLA2G3 CYP2C9	c2.cp
PID_PI3KCI_PATHWAY	0.233156	0.747385	0.399342	1.16143	1705	49	PIK3R6 HCK SGK1 PIK3R5 BTK FGR SYK DAPP1 LYN INPP5D LCK INPPL1 PIK3CG PLCG1 ZAP70 HSP90AA1	c2.cp
REACTOME_APOPTOTIC_EXECUTION_PHASE	0.232472	0.747385	0.399747	1.16261	1700	49	HIST1H1D HIST1H1C HIST1H1E LMNA TJP2 GSN DSP PKP1 CDH1 CASP6 CASP7 H1F0 HMGB2 ACIN1 FNTA TJP1 PLEC BCAP31 LMNB1 PRKCQ DFFB	c2.cp
REACTOME_SYNTHESIS_OF_PA	0.238251	0.761383	0.463828	1.18299	1601	24	PLA2G2E PLA2G2A PLA2G1B PLD1 GPAT2 PLD2 AGPAT2	c2.cp
REACTOME_HS_GAG_BIOSYNTHESIS	0.241613	0.769773	-0.378684	-1.14451	748	30	HS6ST2 GPC6 HS2ST1 NDST3 GLCE HS6ST3 HS3ST1 HS3ST3B1	c2.cp
BIOCARTA_INTEGRIN_PATHWAY	0.242913	0.771563	0.418982	1.16652	1730	38	JUN ACTA1 CAPNS2 PXN TNS1 TLN1 ACTN3 BCAR1 ZYX ITGB1 CSK VCL ITGA1 ROCK1 SHC1 RAF1 MAPK3 RAPGEF1 HRAS SRC	c2.cp
BIOCARTA_PTEN_PATHWAY	0.243917	0.772402	-0.439775	-1.17193	841	18	FASLG PTEN PIK3CA MAPK1 PDPK1 SOS1 CDKN1B PIK3R1	c2.cp
KEGG_STEROID_BIOSYNTHESIS	0.24635	0.775663	0.50736	1.18909	1602	16	HSD17B7 DHCR7 LSS NSDHL SOAT1 FDFT1 EBP CEL LIPA	c2.cp
PID_INSULIN_GLUCOSE_PATHWAY	0.246431	0.775663	0.460964	1.17569	1656	24	SFN TRIP10 ASIP SLC2A4 STX4	c2.cp
BIOCARTA_PPARA_PATHWAY	0.252385	0.790795	0.38671	1.14482	1877	55	HSPA1A JUN DUSP1 PTGS2 MYC NR0B2 NFKBIA STAT5A TNF	c2.cp
REACTOME_CYCLIN_E_ASSOCIATED_EVENTS_DURING_G1_S_TRANSITION_	0.252752	0.790795	0.377139	1.13817	1905	62	CDKN1A MYC CDK2 PSMB9 CCNE2 PSMB8 RPS27A PSMB10 PSME1 PSMC4 CCNH PSMD13 PSMB1 UBA52 PSME2 PSMD9 PSMC5 PSMB5 PSMB4 PSMD6 PSMB6 PSMC3 PSMD4 PSMB3 PSMB7 PSMF1 PSMA2 PSMD8 PSMD3	c2.cp
PID_IFNG_PATHWAY	0.257059	0.801869	0.412821	1.15366	1829	39	IL1B SOCS1 CEBPB IRF1 CASP1 STAT3	c2.cp
SA_CASPASE_CASCADE	0.2594	0.80437	-0.426187	-1.15604	889	19	FASLG PRF1 GZMB XIAP	c2.cp
PID_CD8_TCR_PATHWAY	0.258698	0.80437	0.387431	1.13955	1910	53	CD3D CD80 CD86 PTPN6 GRAP2 CD3G PTPRC MAP3K8 ORAI1 VAV1	c2.cp
KEGG_GLYOXYLATE_AND_DICARBOXYLATE_METABOLISM	0.263255	0.807159	0.501525	1.17541	1712	16	HAO1 MTHFD2 AFMID HYI GRHPR	c2.cp
KEGG_NOTCH_SIGNALING_PATHWAY	0.265898	0.807159	0.394597	1.13891	1935	47	PTCRA DLL4 HES1 DLL1 NOTCH1 NOTCH4 MFNG DTX2 HDAC1 DVL2 PSEN1 JAG1 DTX3L NOTCH3 NCOR2 SNW1 MAML2 KAT2A RFNG DTX3 MAML1	c2.cp
KEGG_NATURAL_KILLER_CELL_MEDIATED_CYTOTOXICITY	0.26546	0.807159	0.340015	1.11131	2184	117	FCER1G PTPN6 PPP3R2 ICAM1 TYROBP FCGR3A RAC2 ITGB2 NFATC1 ICAM2 HLA-C HCST PIK3R5 IFNA10 TNFRSF10C MICB TNFRSF10A HLA-G TNF SYK TNFRSF10B NFATC3 IFNA13 KLRC3 NFATC2 VAV1 CD48 TNFRSF10D HLA-E MICA LCK SH2D1B ULBP2 ITGAL FCGR3B	c2.cp
REACTOME_TRANSCRIPTIONAL_ACTIVITY_OF_SMAD2_SMAD3_SMAD4_HETEROTRIMER	0.263307	0.807159	0.416958	1.14937	1864	36	SERPINE1 JUNB MYC TGIF1	c2.cp
REACTOME_MRNA_SPLICING_MINOR_PATHWAY	0.263821	0.807159	0.408139	1.14474	1884	40	SNRPG POLR2H POLR2J SF3B4 SF3B2 SNRPB POLR2L POLR2F POLR2G SRSF7 SNRPD2 LSM2 POLR2I PRPF8 POLR2C SNRNP40 SNRPF TXNL4A DDX23 GTF2F1 PRPF6 GTF2F2 SNRNP200 SF3B5 SF3B3 SRSF1 SNRPD3	c2.cp
REACTOME_RAS_ACTIVATION_UOPN_CA2_INFUX_THROUGH_NMDA_RECEPTOR	0.26709	0.807159	-0.441416	-1.15754	925	17	GRIN2B CAMK2D GRIN2A GRIN2D AKAP9 CALM1 RASGRF2 RASGRF1 NEFL CALM3	c2.cp
REACTOME_CREB_PHOSPHORYLATION_THROUGH_THE_ACTIVATION_OF_CAMKII	0.264336	0.807159	-0.457297	-1.1669	944	15	GRIN2B CAMK2D GRIN2A CREB1 GRIN2D AKAP9 CALM1	c2.cp
REACTOME_INFLAMMASOMES	0.267251	0.807159	0.499635	1.17098	1738	16	P2RX7 PSTPIP1 CASP1 AIM2 NLRP3 PYCARD TXNIP MEFV HSP90AB1 NLRP1 BCL2L1	c2.cp
REACTOME_SCFSKP2_MEDIATED_DEGRADATION_OF_P27_P21	0.265737	0.807159	0.385796	1.13474	1962	53	CDKN1A CDK2 PSMB9 CCNE2 PSMB8 RPS27A PSMB10 PSME1 PSMC4 PSMD13 PSMB1 UBA52 PSME2 PSMD9 PSMC5 PSMB5 PSMB4 PSMD6 PSMB6 PSMC3 PSMD4 PSMB3 PSMB7 PSMF1 PSMA2 PSMD8 PSMD3	c2.cp
REACTOME_PYRIMIDINE_METABOLISM	0.26953	0.811697	0.461214	1.15725	1800	22	TYMP CDA TYMS TK1 NT5C DPYD	c2.cp
KEGG_APOPTOSIS	0.27619	0.815308	0.353474	1.11238	2174	84	IL1B PPP3R2 PIK3R5 TNFRSF10C NFKBIA TNFRSF10A IRAK3 TNF IL1R1 IL1A TNFRSF10B MYD88 CSF2RB TNFRSF10D IRAK2 RELA TNFRSF1A BIRC3 IL3RA CFLAR CASP6 FAS NFKB1 RIPK1 NGF CASP7 TRADD PIK3CG PPP3CC PRKX IRAK4	c2.cp
BIOCARTA_BAD_PATHWAY	0.273337	0.815308	-0.398316	-1.14056	895	24	KITLG IGF1 KIT PRKAR2B PRKACB PRKAR1A ADCY1 PIK3CA MAPK1	c2.cp
SIG_PIP3_SIGNALING_IN_CARDIAC_MYOCTES	0.274414	0.815308	0.367966	1.12118	2084	66	SFN MYC PIK3R5 GADD45A CDK2 RPS6KA1 CREB5 CDKN2A SLC2A4 PREX1	c2.cp
REACTOME_ACTIVATION_OF_THE_PRE_REPLICATIVE_COMPLEX	0.275862	0.815308	0.428286	1.14206	1903	30	CDC45 MCM10 CDK2 MCM5 RPA4 POLE MCM7	c2.cp
REACTOME_CDK_MEDIATED_PHOSPHORYLATION_AND_REMOVAL_OF_CDC6	0.275464	0.815308	0.393818	1.13154	2003	46	CDK2 PSMB9 PSMB8 RPS27A PSMB10 PSME1 PSMC4 PSMD13 PSMB1 UBA52 PSME2 PSMD9 PSMC5 PSMB5 PSMB4 PSMD6 PSMB6 CDC6 PSMC3 PSME4 PSMD4 PSMB3 PSMB7 PSMF1 PSMA2 PSMD8 PSMD3	c2.cp
REACTOME_IRON_UPTAKE_AND_TRANSPORT	0.27181	0.815308	0.417736	1.14397	1912	35	TF HMOX1 TCIRG1 ATP6V0A4 ATP6V0E1 FTL FTH1 TFRC	c2.cp
REACTOME_RESPIRATORY_ELECTRON_TRANSPORT_ATP_SYNTHESIS_BY_CHEMIOSMOTIC_COUPLING_AND_HEAT_PRODUCTION_BY_UNCOUPLING_PROTEINS_	0.273668	0.815308	0.357507	1.11843	2141	80	UCP1 UCP2 ATP5I NDUFB7 NDUFA3 UCP3 COX6B1 NDUFA12 NDUFB10 ATP5D COX4I1 ATP5E NDUFA13 NDUFA1 NDUFS5 UQCR11 NDUFA11 NDUFB4 UQCRQ ATP5J COX6A1 ATP5J2 NDUFS7 COX5A UQCRB NDUFB8 ATP5O UQCRH NDUFV2 NDUFB1 COX7C ATP5H NDUFB3 ETFB NDUFS8 NDUFB9 NDUFB2 COX7B NDUFS4 COX5B NDUFA6 SDHB NDUFS6 NDUFC1 NDUFAB1 SDHA NDUFA2 ATP5G1 NDUFA7 UQCRHL CYC1 ATP5L NDUFS3 NDUFS2 COX6C NDUFA8	c2.cp
KEGG_GNRH_SIGNALING_PATHWAY	0.277003	0.815405	0.347299	1.11133	2225	97	PLA2G2E PLA2G2A JUN LHB PLA2G12B PLA2G1B HBEGF PLD1 PLA2G4E ITPR3 MAP2K3 MMP14 PLCB3 CALML6 PLA2G4B PLD2 MAPK13 PLCB2 PLA2G3 ATF4	c2.cp
REACTOME_ACYL_CHAIN_REMODELLING_OF_PC	0.27787	0.815657	0.463617	1.1525	1846	21	PLA2G2E PLA2G2A PLA2G1B PLA2G16 PLA2G3 LPCAT2 PLBD1 LPCAT3	c2.cp
PID_CD8_TCR_DOWNSTREAM_PATHWAY	0.281016	0.820284	0.375009	1.11975	2101	58	CD3D EGR4 FOS JUNB FOSL1 EGR1 JUN NFATC1 IFNA10 EOMES CD3G TNF NFATC3 NFATC2	c2.cp
REACTOME_ANTIGEN_ACTIVATES_B_CELL_RECEPTOR_LEADING_TO_GENERATION_OF_SECOND_MESSENGERS	0.280656	0.820284	0.429349	1.13841	1933	29	BTK SYK ITPR3 PIK3AP1 ORAI1 LYN VAV1	c2.cp
PID_RHOA_PATHWAY	0.285223	0.830245	0.393223	1.12605	2072	45	FOS CYR61 JUN ACTA1 PLD1 MAP2K3 MSN EZR TLN1 PLD2 LIMK2 PKN1	c2.cp
REACTOME_P75_NTR_RECEPTOR_MEDIATED_SIGNALLING	0.28839	0.837132	0.35455	1.10519	2247	78	NGFR MAG NFKBIA FGD2 PLEKHG2 MYD88 PREX1 RIPK2 VAV1 RELA SMPD2 ARHGEF1 HDAC1 RPS27A NGF PSEN1 ARHGAP4 AATF ARHGEF16 BCL2L11 SQSTM1 CASP2	c2.cp
REACTOME_ACYL_CHAIN_REMODELLING_OF_PE	0.289805	0.838908	0.465054	1.14276	1912	20	PLA2G2E PLA2G2A PLA2G1B PLA2G16 PLA2G3 MBOAT1 PLBD1 LPCAT3	c2.cp
BIOCARTA_G2_PATHWAY	0.291791	0.840003	0.446769	1.13949	1961	24	CDKN1A GADD45A RPS6KA1 CDC25C CHEK2 CDC34 BRCA1	c2.cp
PID_MAPK_TRK_PATHWAY	0.291381	0.840003	0.414878	1.13002	2041	34	FOS EGR1 RPS6KA1 MAPKAPK2 MAP2K3 EHD4 RIT1	c2.cp
KEGG_RETINOL_METABOLISM	0.294594	0.843426	-0.32655	-1.09058	800	48	ADH1C RDH8 RPE65 UGT2A1 CYP2C18 UGT2B15 CYP3A43 CYP2A6 CYP2C8 UGT1A7	c2.cp
SIG_BCR_SIGNALING_PATHWAY	0.294296	0.843426	0.388869	1.11732	2140	46	NFATC1 NR0B2 CD22 BTK SYK ITPR3 PTPRC LYN NFATC2 VAV1 INPP5D	c2.cp
KEGG_PHENYLALANINE_METABOLISM	0.297934	0.850381	0.480881	1.14039	1946	17	IL4I1 HPD AOC3 MIF AOC2 ALDH3B1 PRDX6	c2.cp
PID_ERBB1_INTERNALIZATION_PATHWAY	0.298651	0.850381	-0.337959	-1.09151	840	41	UBE2D1 SYNJ1 KRAS EPS15 PIK3CA NRAS PIK3CB CHMP3 ITSN1 SOS1 USP8	c2.cp
PID_DNA_PK_PATHWAY	0.300429	0.850809	-0.435618	-1.12667	1049	16	DNTT LIG4 XRCC4	c2.cp
PID_S1P_S1P2_PATHWAY	0.300119	0.850809	0.443781	1.13186	2017	24	FOS JUN CDH5 GNA13 S1PR2 GNA15	c2.cp
KEGG_TGF_BETA_SIGNALING_PATHWAY	0.30273	0.855008	0.348175	1.09571	2383	84	GDF5 PITX2 THBS1 MYC TGFB1 ID1 FST TNF BMP4 ACVRL1 COMP INHBA TGFB3 THBS2 ID3 SMAD6 ID4 BMP8B AMH LEFTY1 RPS6KB2 INHBE SMAD7 SP1	c2.cp
KEGG_ACUTE_MYELOID_LEUKEMIA	0.305355	0.856852	0.370184	1.10185	2280	57	SPI1 MYC RUNX1 PIK3R5 STAT5A PIM1 EIF4EBP1 JUP RELA CEBPA TCF7 STAT3 NFKB1 RPS6KB2 PML PIK3CG LEF1 ARAF	c2.cp
PID_A6B1_A6B4_INTEGRIN_PATHWAY	0.305017	0.856852	0.386017	1.10913	2218	46	SFN ERBB3 ITGB4 PMP22 LAMA5 CD9 IL1A CDH1 LAMB2 CASP7 LAMA1 ITGB1 ITGA6 LAMC1 ERBB2	c2.cp
REACTOME_ACTIVATION_OF_NF_KAPPAB_IN_B_CELLS	0.306383	0.856852	0.365307	1.09986	2303	61	NFKBIA PSMB9 RELA NFKBIE REL PSMB8 NFKBIB RPS27A PSMB10 PSME1 PSMC4 MALT1 PSMD13 BCL10 PSMB1 IKBKB UBA52 PSME2 PSMD9 PSMC5 PSMB5 PSMB4 PSMD6 PSMB6 PSMC3 PSME4 PSMD4 PSMB3 PSMB7 PSMF1 PSMA2 PSMD8 PSMD3	c2.cp
REACTOME_TRANSFERRIN_ENDOCYTOSIS_AND_RECYCLING	0.306663	0.856852	0.441345	1.12565	2061	24	TF TCIRG1 ATP6V0A4 ATP6V0E1 TFRC	c2.cp
KEGG_ONE_CARBON_POOL_BY_FOLATE	0.308799	0.860519	0.477364	1.13205	2017	17	TYMS MTHFD2 ALDH1L1 SHMT1 SHMT2 DHFR	c2.cp
PID_IL8_CXCR2_PATHWAY	0.317394	0.877453	0.408992	1.10765	2216	33	RAC2 PIK3R6 HCK DOCK2 FGR VASP LYN PLCB3 PLD2 PLCB2 GNA15 PIK3CG	c2.cp
REACTOME_PREFOLDIN_MEDIATED_TRANSFER_OF_SUBSTRATE_TO_CCT_TRIC	0.317045	0.877453	0.428596	1.11337	2166	26	TUBA1C TUBB6 PFDN5 TUBB2A PFDN2 TUBB4B TUBA3D TUBB2B TUBB1 CCT3 ACTB TUBA4A TCP1 TUBB3 TUBA1A CCT5 PFDN6 CCT7	c2.cp
REACTOME_POTASSIUM_CHANNELS	0.315789	0.877453	-0.280807	-1.05699	641	94	KCNK18 KCNJ16 KCND2 KCNA4 KCNA2 KCNAB1 GNG10 KCNMB3 KCNA7 HCN1 KCNJ3 KCNK1 KCNH5 KCNV1 KCNMB2 KCNK2 KCNS3 KCNQ5 KCNH7 GNG2 KCNK17 KCNK3 KCNQ4 KCNC2 KCNQ3 KCNS2 KCNB2 KCNG3 KCNC3 KCNB1 KCNH6 KCNJ12 KCNA3 GNB1 GNG4 KCNAB3 KCNQ2 KCND1 GNG3 GABBR1 KCNA1 KCNJ15 KCNH4	c2.cp
KEGG_LONG_TERM_POTENTIATION	0.325135	0.88569	-0.297596	-1.0599	779	67	PLCB1 RPS6KA6 GRIA2 CAMK4 PPP3CA ITPR1 PPP1CB PRKACB GRIN2B CAMK2D ADCY1 KRAS PRKCA PPP3CB GRIN2A GRM1 GNAQ NRAS MAPK1 PLCB4 PRKCB GRIN2D PPP3R1 PPP1R12A CALM1 BRAF RPS6KA3 EP300	c2.cp
BIOCARTA_GH_PATHWAY	0.32158	0.88569	0.427332	1.11008	2197	26	PTPN6 SOCS1 STAT5A RPS6KA1 SLC2A4	c2.cp
BIOCARTA_DEATH_PATHWAY	0.323407	0.88569	0.407201	1.1028	2258	33	LMNA NFKBIA TNFRSF10A TNFRSF10B RELA BIRC3 CFLAR CASP6 NFKB1 RIPK1 CASP7 TRADD TNFRSF25 CASP9 CASP10 MAP3K14 DFFB BID	c2.cp
PID_ERBB1_DOWNSTREAM_PATHWAY	0.326307	0.88569	0.334192	1.07865	2646	105	SFN FOS ZFP36 SH2D2A EGR1 JUN DUSP1 PLD1 ARPC1B WASF2 PLD2 RALGDS MYLPF IQGAP1 STAT3 DUSP6	c2.cp
PID_CXCR3_PATHWAY	0.325688	0.88569	0.387918	1.09867	2342	42	CXCL10 CXCR3 PF4 ITGB2 CXCL13 MAP2K3	c2.cp
PID_FGF_PATHWAY	0.325246	0.88569	0.368876	1.08834	2412	54	SPP1 FOS PLAUR JUN FGF4 RPS6KA1 MMP9 FGFR4 FGFR2 CDH1 PLAU FGF1 FGF17 PLCG1 GAB1 FGFR1 FGF18 FGF8 RUNX2 BGLAP	c2.cp
REACTOME_CTLA4_INHIBITORY_SIGNALING	0.323605	0.88569	0.449131	1.11649	2150	21	CD80 CD86 LYN LCK	c2.cp
REACTOME_FATTY_ACYL_COA_BIOSYNTHESIS	0.328702	0.889881	0.462719	1.11112	2152	18	ELOVL1 ELOVL3 ACSL5 ACSL1 ELOVL5 SLC25A1 TECR	c2.cp
ST_B_CELL_ANTIGEN_RECEPTOR	0.331603	0.894251	0.394781	1.09914	2362	38	NFKB2 NFKBIA BTK ITPKB SYK LYN VAV1 NFKBIE NFKBIB NFKB1 PRDX1 TONSL ITPKA NFKBIL1 CSK PLCG2 SHC1 RAF1 AKT2 PIK3CD	c2.cp
REACTOME_SHC_MEDIATED_SIGNALLING	0.332028	0.894251	-0.430229	-1.09783	1186	15	KRAS NRAS MAPK1 SHC3 SOS1 CDK1 YWHAB MAP2K1	c2.cp
PID_LKB1_PATHWAY	0.333058	0.89472	0.379375	1.09005	2422	46	SFN SIK1 MYC	c2.cp
REACTOME_OTHER_SEMAPHORIN_INTERACTIONS	0.334837	0.897193	0.483097	1.11308	2151	15	TYROBP TREM2 PLXNB3 SEMA6A	c2.cp
SA_PTEN_PATHWAY	0.338044	0.898926	-0.415191	-1.08877	1171	17	PTEN BPNT1 PIK3CA MAPK1 PDPK1 AKT3 SOS1 IPCEF1	c2.cp
REACTOME_SIGNALING_BY_NODAL	0.338065	0.898926	-0.408173	-1.08772	1166	18	FOXH1 NODAL ACVR1C	c2.cp
REACTOME_MAP_KINASE_ACTIVATION_IN_TLR_CASCADE	0.336477	0.898926	0.373405	1.086	2461	49	FOS JUN NOD2 RPS6KA1 MAPKAPK2 MAP2K3 RIPK2 IRAK2	c2.cp
PID_ARF6_DOWNSTREAM_PATHWAY	0.340128	0.902115	0.481294	1.10893	2185	15	PLAUR PLD1 PLD2	c2.cp
BIOCARTA_IGF1_PATHWAY	0.344516	0.909621	0.442463	1.09992	2289	21	FOS JUN	c2.cp
REACTOME_YAP1_AND_WWTR1_TAZ_STIMULATED_GENE_EXPRESSION	0.344699	0.909621	0.434211	1.09599	2304	23	TBX5 TEAD4 TEAD3 NPPA TEAD2 CTGF RUNX2 SMARCD3 PPARA	c2.cp
REACTOME_PKB_MEDIATED_EVENTS	0.347173	0.911626	-0.359617	-1.06941	1086	28	PRKAA2 PRKAA1 PPM1A EIF4E CAB39L PRKAG2 CAB39 RPS6KB1	c2.cp
REACTOME_LIPID_DIGESTION_MOBILIZATION_AND_TRANSPORT	0.347203	0.911626	0.383267	1.08096	2494	41	FABP4 LDLR LIPE APOA5 LDLRAP1 AMN APOE HSPG2 SCARB1 ABCG1 PLTP BMP1 ABHD5 PLIN1 APOC2 LPL LCAT SDC1 APOA2 P4HB	c2.cp
KEGG_RENIN_ANGIOTENSIN_SYSTEM	0.34853	0.912095	0.477931	1.10118	2239	15	CPA3 AGTR2 REN AGT ANPEP ENPEP	c2.cp
REACTOME_CREB_PHOSPHORYLATION_THROUGH_THE_ACTIVATION_OF_RAS	0.349146	0.912095	-0.361818	-1.06566	1103	27	RPS6KA6 GRIN2B CAMK2D GRIN2A MAPK1 CREB1 PDPK1 GRIN2D AKAP9 CALM1 RASGRF2 BRAF RPS6KA3	c2.cp
REACTOME_NITRIC_OXIDE_STIMULATES_GUANYLATE_CYCLASE	0.35	0.912095	-0.370932	-1.0717	1126	25	GUCY1A2 PDE10A PDE6A KCNMB3 PDE5A GUCY1A3 KCNMB2 NOS1 PRKG2 GUCY1B3 PDE1B NOS2 PDE1A	c2.cp
BIOCARTA_INSULIN_PATHWAY	0.351738	0.914343	0.440168	1.09421	2337	21	FOS JUN SLC2A4	c2.cp
BIOCARTA_IGF1R_PATHWAY	0.35512	0.916892	-0.38288	-1.07275	1178	22	PRKAR2B PRKACB PRKAR1A ADCY1 PIK3CA MAPK1 SOS1 PIK3R1 PRKAR2A MAP2K1 IRS1	c2.cp
REACTOME_M_G1_TRANSITION	0.354458	0.916892	0.341366	1.06409	2762	78	CDC45 MCM10 CDK2 MCM5 PSMB9 RPA4 GMNN POLE PSMB8 RPS27A MCM7 PSMB10 PSME1 PSMC4 POLA1 PSMD13 PSMB1 UBA52 PRIM2 PSME2 PSMD9 PSMC5 PSMB5 PSMB4 PSMD6 PSMB6 CDC6 PSMC3 MCM8 PSME4 POLA2 PSMD4 PSMB3 PSMB7 PSMF1 MCM6 PSMA2 PSMD8 PSMD3	c2.cp
REACTOME_SYNTHESIS_OF_GLYCOSYLPHOSPHATIDYLINOSITOL_GPI	0.35535	0.916892	-0.409981	-1.07511	1231	17	PIGW PIGN PIGX PIGB PIGF SEMA6D	c2.cp
REACTOME_INTRINSIC_PATHWAY	0.356385	0.917297	0.466337	1.09294	2318	16	GP1BB F11 VWF GP1BA KLKB1 SERPING1 GP5 F2 GP9	c2.cp
REACTOME_SHC1_EVENTS_IN_ERBB4_SIGNALING	0.358718	0.921033	-0.389349	-1.06887	1219	20	NRG4 BTC ERBB4 KRAS NRAS MAPK1 SOS1 CDK1 YWHAB EREG MAP2K1	c2.cp
KEGG_ECM_RECEPTOR_INTERACTION	0.362159	0.927588	0.336444	1.05879	2851	84	SPP1 COL2A1 ITGB3 THBS1 CD44 ITGA5 ITGB4 LAMA5 TNC COL1A1 COL4A1 ITGA10 GP1BB HSPG2 COMP THBS2 ITGA2 COL4A2 VWF SDC4 LAMB2 COL6A2 GP1BA COL4A4 LAMA1 ITGB7 ITGB5 ITGA11 COL6A1 TNXB COL11A2 ITGB1 COL5A3 ITGA6 GP5 SDC1 LAMC1 ITGA2B	c2.cp
KEGG_OLFACTORY_TRANSDUCTION	0.363174	0.927913	0.330823	1.06023	2924	98	OR2T6 OR9Q1 OR2L2 OR5C1 OR2L8 OR2A7 OR2L3 OR56B1 OR2T4 OR1D2 OR52I1 OR5B12 OR6B3 OR2AE1 OR2M3 CLCA4 GUCA1C OR1E1 OR7A5 OR2H2 OR13J1 CLCA2 OR6M1 OR51E2 CALML6 OR4F3	c2.cp
PID_CMYB_PATHWAY	0.365079	0.930507	0.336055	1.05756	2874	84	CDKN1A ADA SPI1 PTCRA PTGS2 MYC MYOD1 CEBPD HES1 CEBPB PIM1 CDKN2A ETS1 CSF1R LYZ MYF6 GATA1 CEBPA BIRC3 CD4 ELANE IQGAP1 CASP6 ANPEP ZFPM1	c2.cp
PID_NFAT_3PATHWAY	0.368214	0.936214	0.360971	1.06172	2719	53	SFN NR4A1 NFATC1 PIM1 NFATC3 MAP3K8 NFATC2	c2.cp
REACTOME_TGF_BETA_RECEPTOR_SIGNALING_ACTIVATES_SMADS	0.369423	0.937007	0.421258	1.07442	2483	24	PPP1R15A TGFB1 RPS27A SMAD7	c2.cp
BIOCARTA_BCELLSURVIVAL_PATHWAY	0.384048	0.940641	0.456582	1.07008	2498	16	FOS JUND CASP7 PIK3CG DPF2 ITGB1	c2.cp
BIOCARTA_MAPK_PATHWAY	0.380512	0.940641	0.332352	1.04879	3002	86	FOS JUN MYC TGFB1 NFKBIA RPS6KA1 MAPKAPK2 MAP2K3 MAP3K8 MKNK2 RELA TGFB3 CEBPA MAP3K6 MAPK13 MAP4K4 NFKB1 RIPK1 RPS6KB2 TRADD ARAF SP1 MAPK7 MAP3K11 MAP4K1	c2.cp
PID_RAC1_REG_PATHWAY	0.374825	0.940641	0.383617	1.06805	2670	38	DOCK2 DOCK6 DEF6 SPATA13 PREX1 VAV1 ARHGAP17 DOCK1	c2.cp
PID_HES_HEY_PATHWAY	0.374571	0.940641	0.365245	1.05823	2727	48	GATA4 NEUROG3 MYOD1 HES1 ID1 GATA1 NOTCH1 CD4 STAT3 HEY2 HDAC1 HES6 PTF1A NCOR2 RUNX2 BGLAP MAML2 KDR RBBP8 ARNT SPEN MAML1 TWIST1	c2.cp
REACTOME_GLYCOGEN_BREAKDOWN_GLYCOGENOLYSIS	0.382708	0.940641	0.450993	1.06951	2500	17	PHKA1P1 PHKG1 PYGL	c2.cp
REACTOME_DOWNREGULATION_OF_TGF_BETA_RECEPTOR_SIGNALING	0.373853	0.940641	0.433376	1.07733	2484	21	PPP1R15A TGFB1 RPS27A SMAD7	c2.cp
REACTOME_MHC_CLASS_II_ANTIGEN_PRESENTATION	0.38056	0.940641	0.332023	1.04894	3002	87	HLA-DRB5 CD74 HLA-DQA1 HLA-DRB1 HLA-DPA1 HLA-DQA2 CTSH HLA-DPB1 HLA-DOA DNM2 HLA-DOB KLC3 HLA-DMA CTSS KIF2C KIF20A KIF5A DYNLL1 KIF26A HLA-DMB SEC13 KIF18A CTSC CTSB SEC24D	c2.cp
REACTOME_SHC1_EVENTS_IN_EGFR_SIGNALING	0.375385	0.940641	-0.415998	-1.06151	1341	15	KRAS NRAS MAPK1 SOS1 CDK1 YWHAB MAP2K1 EGF	c2.cp
REACTOME_OLFACTORY_SIGNALING_PATHWAY	0.376673	0.940641	0.348779	1.05421	2841	63	OR9Q1 OR2L2 OR5C1 OR2L8 OR2A7 OR2L3 OR56B1 OR2T4 OR1D2 OR52I1 OR5B12 OR6B3 OR2AE1 OR2M3 OR1E1 OR7A5 OR6M1 OR51E2 OR4F3 OR5K2	c2.cp
REACTOME_G1_S_TRANSITION	0.38435	0.940641	0.323673	1.04608	3123	106	CDKN1A CDC45 MYC MCM10 TYMS CDK2 MCM5 PSMB9 CCNE2 RPA4 POLE PSMB8 RPS27A MCM7 PSMB10 PSME1 PSMC4 PPP2R1B DHFR CCNH POLA1 PSMD13 PSMB1 UBA52 PRIM2 PSME2 PSMD9 PSMC5 PSMB5 PSMB4 PSMD6 PSMB6 CDC6 PSMC3 MCM8 POLA2 PSMD4 PSMB3 PSMB7 PSMF1 MCM6 PSMA2 PPP2R3B PSMD8 PSMD3	c2.cp
REACTOME_G_ALPHA_S_SIGNALLING_EVENTS	0.373054	0.940641	0.32475	1.05208	3042	108	CALCA PTH2 GHRH ADM GIPR LHB CALCB MC3R RXFP2 PTGER2 TSHB GNG8 PTGIR GPBAR1 SCT MC5R RAMP1 GNG5 GCGR PDE8A PTH1R MC4R GNGT2	c2.cp
REACTOME_NA_CL_DEPENDENT_NEUROTRANSMITTER_TRANSPORTERS	0.384336	0.940641	-0.413102	-1.05412	1373	15	SLC6A2 SLC18A2 SLC18A1 SLC6A5 SLC6A1 SLC6A15	c2.cp
REACTOME_AUTODEGRADATION_OF_THE_E3_UBIQUITIN_LIGASE_COP1	0.381404	0.940641	0.365826	1.05586	2776	47	PSMB9 PSMB8 RPS27A PSMB10 PSME1 PSMC4 PSMD13 PSMB1 UBA52 PSME2 PSMD9 PSMC5 PSMB5 PSMB4 RFWD2 PSMD6 PSMB6 PSMC3 PSME4 PSMD4 TP53 PSMB3 PSMB7 PSMF1 PSMA2 PSMD8 PSMD3	c2.cp
REACTOME_PHOSPHOLIPASE_C_MEDIATED_CASCADE	0.384358	0.940641	-0.308851	-1.03646	1031	49	FGF6 FGF23 KL FGF9 CAMK4 PRKAR2B PRKACB PRKAR1A ADCY1 PRKCA FGF7 CREB1 PRKCE PDE1B CALM1 PDE1A FGF2	c2.cp
REACTOME_IL_RECEPTOR_SHC_SIGNALING	0.380874	0.940641	0.417698	1.06534	2560	24	PTPN6 CSF2RA IL5RA CSF2RB IL5 IL3RA GAB2 IL2RG INPPL1	c2.cp
BIOCARTA_MAL_PATHWAY	0.391873	0.952027	0.438726	1.06458	2574	19	ACTA1 MAL ROCK1 SRF HNF1A RAF1 MAPK3 HRAS RAC1 RHOA MAP2K2	c2.cp
ST_INTERLEUKIN_4_PATHWAY	0.39001	0.952027	0.420917	1.06243	2607	23	CISH IL4R NR0B2 INPP5D IL13RA1 IL2RG TYK2 STAT6	c2.cp
PID_AJDISS_2PATHWAY	0.392009	0.952027	0.36166	1.04784	2854	48	PTPN6 MMP7 MMP3 GDNF DSP JUP DNM2 CDH1 GNA13 IQGAP1 CTNNA1 BDNF	c2.cp
REACTOME_PLATELET_SENSITIZATION_BY_LDL	0.392654	0.952027	0.453892	1.06377	2554	16	PTPN6 PECAM1 FGR	c2.cp
BIOCARTA_PGC1A_PATHWAY	0.395482	0.952255	-0.372612	-1.04399	1312	22	CAMK4 PPP3CA CAMK2D PPP3CB MEF2C PPARGC1A CALM1 MEF2A	c2.cp
PID_ARF6_TRAFFICKING_PATHWAY	0.394343	0.952255	0.361186	1.04646	2871	48	ITGA5 PLD1 ACAP1 SLC2A4 ITGA10 DNM2 ITGA2 PLD2 CDH1 VAMP3 SCAMP2 CTNNA1 EXOC7 ITGA11 ITGB1 IL2RA ITGA6 BIN1 ITGA7	c2.cp
PID_SYNDECAN_1_PATHWAY	0.394639	0.952255	0.365182	1.04927	2870	46	COL2A1 MMP7 TGFB1 COL4A5 LAMA5 MMP9 COL9A2 COL1A1 MMP1 COL4A1 COL9A3 COL16A1 COL6A2 COL4A4 PPIB BSG COL6A1 COL11A2 CCL5 SDC1 COL7A1	c2.cp
SIG_CD40PATHWAYMAP	0.396404	0.952281	0.385273	1.04939	2777	34	NFKB2 DUSP1 NFKBIA CD40 NFKBIE MAPK13 NFKBIB NFKB1	c2.cp
REACTOME_MAPK_TARGETS_NUCLEAR_EVENTS_MEDIATED_BY_MAP_KINASES	0.399449	0.957396	0.391829	1.04485	2756	30	FOS JUN RPS6KA1 MAPKAPK2	c2.cp
REACTOME_PIP3_ACTIVATES_AKT_SIGNALING	0.400877	0.958619	0.400753	1.04758	2741	27	NR4A1 CDKN1A FOXO4 RPS6KB2 FOXO1 PHLPP1 CASP9	c2.cp
PID_S1P_META_PATHWAY	0.403039	0.959592	0.424477	1.05521	2678	21	SPHK1 S1PR5 GNA13 S1PR2 GNA15 S1PR4 S1PR3 GNA12 S1PR1	c2.cp
REACTOME_REGULATION_OF_MRNA_STABILITY_BY_PROTEINS_THAT_BIND_AU_RICH_ELEMENTS	0.403121	0.959592	0.331409	1.03754	3151	81	HSPA1B HSPB1 ZFP36 ZFP36L1 PSMB9 MAPKAPK2 PSMB8 RPS27A PSMB10 PSME1 PSMC4 PSMD13 PSMB1 UBA52 PABPC1 PSME2 EXOSC1 PSMD9 PSMC5 PSMB5 PSMB4 PSMD6 PSMB6 PSMC3 EXOSC8 PSME4 PSMD4 PSMB3 PSMB7 EXOSC4 PSMF1 EXOSC7 EIF4G1 PSMA2 MAPK11 PSMD8 PSMD3	c2.cp
REACTOME_CD28_DEPENDENT_PI3K_AKT_SIGNALING	0.405446	0.960769	0.423631	1.0531	2694	21	CD80 CD86 MAP3K8 LCK	c2.cp
REACTOME_SYNTHESIS_OF_DNA	0.405586	0.960769	0.326521	1.0359	3223	90	CDKN1A CDC45 CDK2 MCM5 PSMB9 GINS4 POLD1 POLE PSMB8 RPS27A MCM7 PSMB10 PSME1 PSMC4 GINS2 POLA1 LIG1 RFC2 PSMD13 PSMB1 UBA52 PRIM2 PSME2 PSMD9 PSMC5 DNA2 PSMB5 PSMB4 POLD2 PSMD6 PSMB6 CDC6 POLD4 PSMC3 MCM8 PSME4 POLA2 PSMD4 PSMB3 PSMB7 PSMF1 MCM6 PSMA2 PSMD8 PSMD3 FEN1 MCM3 CCNA1 PSMA7	c2.cp
REACTOME_S_PHASE	0.406373	0.960769	0.320355	1.03535	3302	106	CDKN1A CDC45 MYC CDK2 MCM5 PSMB9 CCNE2 GINS4 POLD1 POLE PSMB8 RPS27A MCM7 PSMB10 PSME1 PSMC4 GINS2 CCNH POLA1 LIG1 RFC2 PSMD13 PSMB1 UBA52 PRIM2 PSME2 CDK4 PSMD9 PSMC5 DNA2 PSMB5 PSMB4 POLD2 PSMD6 PSMB6 CDC6 POLD4 PSMC3 MCM8 PSME4 POLA2 PSMD4 PSMB3 PSMB7 PSMF1 MCM6 PSMA2 PSMD8 PSMD3	c2.cp
REACTOME_NEF_MEDIATES_DOWN_MODULATION_OF_CELL_SURFACE_RECEPTORS_BY_RECRUITING_THEM_TO_CLATHRIN_ADAPTERS	0.408942	0.962487	-0.371744	-1.03082	1371	21	CD28 CD8B AP1S2	c2.cp
REACTOME_REGULATION_OF_SIGNALING_BY_CBL	0.408092	0.962487	0.438666	1.05336	2672	18	HCK SYK LYN VAV1	c2.cp
PID_CASPASE_PATHWAY	0.411701	0.964503	0.353809	1.03546	3025	51	LMNA KRT18 ACTA1 SREBF1 TNF GSN CASP4 TNFRSF1A BIRC3 ARHGDIB CASP1 CASP6 RIPK1 CASP7 TRADD NUMA1 CASP2 CASP9 CASP10 BAX LMNB1 CFL2 DFFB BID DIABLO	c2.cp
REACTOME_TRANSPORT_OF_VITAMINS_NUCLEOSIDES_AND_RELATED_MOLECULES	0.412567	0.964503	0.391015	1.03677	2842	29	SLCO1B1 SLC27A6 SLCO4A1 SLC35D2 SLCO1A2 SLCO3A1	c2.cp
REACTOME_IL_2_SIGNALING	0.41089	0.964503	0.374245	1.04196	2927	38	PTPN6 CSF2RA IL5RA STAT5A SYK CSF2RB LCK IL5 IL3RA GAB2 IL2RG INPPL1	c2.cp
REACTOME_P53_INDEPENDENT_G1_S_DNA_DAMAGE_CHECKPOINT	0.414252	0.966281	0.356955	1.0342	3016	48	PSMB9 PSMB8 CHEK2 RPS27A PSMB10 PSME1 PSMC4 PSMD13 PSMB1 UBA52 PSME2 PSMD9 PSMC5 PSMB5 PSMB4 PSMD6 PSMB6 PSMC3 PSME4 PSMD4 PSMB3 PSMB7 PSMF1 PSMA2 PSMD8 PSMD3	c2.cp
KEGG_COLORECTAL_CANCER	0.419043	0.97311	0.340943	1.02894	3159	62	FOS JUN RAC2 MYC TGFB1 PIK3R5 TGFB3 TCF7 RALGDS PIK3CG LEF1 ARAF TCF7L1 AXIN1 CASP9	c2.cp
BIOCARTA_HIVNEF_PATHWAY	0.41885	0.97311	0.345564	1.03183	3132	58	TNFRSF1B LMNA NFKBIA CDK11A TNF GSN RELA TNFRSF1A BIRC3 ARHGDIB TRAF1 CFLAR CASP6 FAS NFKB1 RIPK1 CASP7 PSEN1 TRADD NUMA1 CASP2 CASP9	c2.cp
BIOCARTA_G1_PATHWAY	0.421627	0.976941	0.39075	1.03034	2896	28	CDKN1A TGFB1 CDK2 CDKN2A TGFB3 HDAC1 ABL1 DHFR	c2.cp
BIOCARTA_SPPA_PATHWAY	0.425305	0.97895	0.418135	1.03944	2826	21	F2RL3 TBXAS1 SYK PTGS1	c2.cp
BIOCARTA_HSP27_PATHWAY	0.423837	0.97895	0.449876	1.03654	2723	15	HSPB1 ACTA1 MAPKAPK2 TNF IL1A	c2.cp
REACTOME_GRB2_EVENTS_IN_ERBB2_SIGNALING	0.425301	0.97895	-0.364741	-1.02193	1411	22	NRG4 BTC ERBB4 KRAS NRAS MAPK1 SOS1 CDK1 YWHAB EREG MAP2K1	c2.cp
PID_PI3KCI_AKT_PATHWAY	0.428815	0.984861	0.375657	1.02874	3017	35	SFN CDKN1A SLC2A4 FOXO4 FOXO1 HSP90AA1 CASP9	c2.cp
KEGG_EPITHELIAL_CELL_SIGNALING_IN_HELICOBACTER_PYLORI_INFECTION	0.430376	0.986279	0.335764	1.02306	3269	66	JUN TCIRG1 NFKBIA HBEGF ATP6V0A4 F11R CXCL1 LYN JAM3 RELA ATP6V0E1 MAPK13	c2.cp
REACTOME_N_GLYCAN_ANTENNAE_ELONGATION_IN_THE_MEDIAL_TRANS_GOLGI	0.431924	0.987659	-0.379286	-1.01074	1490	18	B4GALT6 MGAT4C ST8SIA6 ST8SIA2 MGAT4A MGAT3	c2.cp
KEGG_GLYCOLYSIS_GLUCONEOGENESIS	0.975873	1	0.215893	0.636977	7239	54	PGAM2 HK2 LDHC PCK1 HK3 ADH6 ACSS2 GALM	c2.cp
KEGG_CITRATE_CYCLE_TCA_CYCLE	0.973963	1	-0.206669	-0.61902	3029	29	DLAT DLD SUCLA2 SDHD SDHC IDH3A OGDHL MDH1 CS OGDH FH ACLY IDH3B	c2.cp
KEGG_PENTOSE_PHOSPHATE_PATHWAY	0.772457	1	0.31024	0.791269	5193	24	RBKS TKT TALDO1 PFKL PGLS H6PD DERA PFKP PGM2 ALDOA TKTL1 ALDOC RPIA G6PD PGD	c2.cp
KEGG_PENTOSE_AND_GLUCURONATE_INTERCONVERSIONS	0.957056	1	0.250647	0.577505	6150	15	UGT1A6 UGT2B7 UGDH DCXR GUSB CRYL1 DHDH UGT1A1	c2.cp
KEGG_FRUCTOSE_AND_MANNOSE_METABOLISM	0.970938	1	0.22151	0.599903	6781	33	HK2 HK3 PFKFB1 PFKFB3 PHPT1 PFKFB4 PFKL FUK	c2.cp
KEGG_FATTY_ACID_METABOLISM	0.882744	1	-0.236353	-0.760723	2521	40	ADH1C ACSL6 ACSL4 EHHADH ACSL3 ACADM CYP4A11 ACADSB ACADL ADH4 ADH1B	c2.cp
KEGG_PRIMARY_BILE_ACID_BIOSYNTHESIS	0.847549	1	0.305137	0.71514	5514	16	CH25H CYP27A1 HSD3B7 ACOX2	c2.cp
KEGG_STEROID_HORMONE_BIOSYNTHESIS	0.969663	1	0.221355	0.624308	6967	41	CYP19A1 HSD17B3 UGT1A6 HSD17B7 CYP21A2 HSD11B2 UGT2B7 CYP11A1 COMT AKR1C1 SULT1E1	c2.cp
KEGG_OXIDATIVE_PHOSPHORYLATION	0.701769	1	0.271731	0.884964	5750	113	TCIRG1 ATP6V0A4 COX4I2 ATP4A ATP6V0E1 COX8C LHPP ATP5I NDUFB7 NDUFA3 COX6B1 NDUFA4L2 NDUFB10 ATP5D COX4I1 ATP5E NDUFA1 NDUFS5 UQCR11 NDUFA11 NDUFB4 UQCRQ COX17 ATP5J COX6A1 ATP5J2 NDUFS7 UQCR10 COX5A UQCRB NDUFB8 ATP5O UQCRH NDUFV2 NDUFB1 COX7C COX7A1 ATP5H NDUFB3 ATP5G2 ATP6V0D2 ATP6V0B NDUFS8 NDUFB9 NDUFB2 COX7B NDUFS4 COX5B NDUFA6 COX7A2 ATP6V0C ATP6V1F SDHB NDUFS6 NDUFC1 ATP6V1C2 NDUFAB1 SDHA…	c2.cp
KEGG_PURINE_METABOLISM	1	1	-0.147046	-0.589036	1444	152	GUCY1A2 POLR3G AK7 PDE10A PDE6A NT5E DCK ALLC RRM2 PDE7B PDE5A RRM2B PDE6H PKLR GUCY1A3 NME5 ADCY1 HPRT1 PDE6C ADSS PDE8B POLE2	c2.cp
KEGG_PYRIMIDINE_METABOLISM	0.989758	1	0.200685	0.64101	7923	96	TYMP PNP CDA TYMS ZNRD1 TK1 ENTPD8 POLD1 POLE POLR2H UCKL1 POLR2J NT5C DPYD POLR2L POLR2F DTYMK POLA1 POLR2G POLR1E PRIM2 POLE4 PNPT1 NME3 NME2 POLD2 POLD4 POLR2I CTPS2 NME4 POLR2C NT5C2 POLA2	c2.cp
KEGG_ALANINE_ASPARTATE_AND_GLUTAMATE_METABOLISM	0.816861	1	0.285319	0.765515	5677	31	IL4I1 ASPA AGXT ADSSL1 GLUL GFPT2 DDO	c2.cp
KEGG_GLYCINE_SERINE_AND_THREONINE_METABOLISM	0.646914	1	0.331737	0.884607	4464	30	SDS CTH AGXT PHGDH SHMT1 AOC3 PSAT1 SHMT2 CHDH	c2.cp
KEGG_CYSTEINE_AND_METHIONINE_METABOLISM	0.535816	1	0.350626	0.955019	3754	34	IL4I1 SDS LDHC CTH MPST	c2.cp
KEGG_VALINE_LEUCINE_AND_ISOLEUCINE_DEGRADATION	0.980392	1	-0.198345	-0.649632	2699	44	HMGCS2 EHHADH DLD DBT ACADM BCKDHA BCKDHB ACADSB BCAT1 ABAT	c2.cp
KEGG_LYSINE_DEGRADATION	0.996488	1	0.17884	0.499781	7093	39	PLOD3 AASS BBOX1 PLOD1 DOT1L HADHA ALDH7A1 SETD1A ALDH2 EHMT1 SETDB1 TMLHE GCDH SETD2 ACAT2	c2.cp
KEGG_ARGININE_AND_PROLINE_METABOLISM	0.889841	1	0.252402	0.740058	6542	52	NOS3 SAT1 CKM ARG2 PRODH P4HA1 GLUL P4HA3 P4HA2 CKMT2 ALDH7A1 SAT2 ACY1 OTC ARG1 ALDH2 LAP3 CKB PYCR1 NAGS CPS1 SRM	c2.cp
KEGG_HISTIDINE_METABOLISM	0.986085	1	-0.195776	-0.576619	3117	27	ALDH3A1 HDC ALDH1A3 DDC	c2.cp
KEGG_TYROSINE_METABOLISM	0.90125	1	0.253038	0.707134	6415	39	IL4I1 HPD ADH6 AOC3 COMT FAH TYR MIF AOC2	c2.cp
KEGG_TRYPTOPHAN_METABOLISM	0.984985	1	0.206764	0.575665	7018	38	IL4I1 AFMID AANAT CAT	c2.cp
KEGG_BETA_ALANINE_METABOLISM	0.970181	1	-0.213175	-0.597274	3220	22	GAD2 EHHADH GAD1 ACADM	c2.cp
KEGG_SELENOAMINO_ACID_METABOLISM	0.991159	1	-0.183958	-0.535332	3138	26	MAT1A MAT2B METTL2B SEPHS1 AHCYL2 CBS LCMT2 PAPSS2 HEMK1 PAPSS1 METTL6 TRMT11	c2.cp
KEGG_GLUTATHIONE_METABOLISM	0.907827	1	-0.227096	-0.746576	2481	45	GSTM1 RRM2 GSTA1 RRM2B GSTM5 GCLM	c2.cp
KEGG_N_GLYCAN_BIOSYNTHESIS	0.762376	1	-0.254449	-0.841566	2078	46	MAN1A1 ALG10B MAN1A2 TUSC3 ALG6 ALG10 STT3B ALG13 MGAT4A MGAT3	c2.cp
KEGG_OTHER_GLYCAN_DEGRADATION	0.727556	1	0.352186	0.811455	4675	15	MAN2B1 ENGASE NEU1 FUCA2 MAN2C1 MANBA	c2.cp
KEGG_O_GLYCAN_BIOSYNTHESIS	0.999367	1	-0.15486	-0.456107	3159	27	C1GALT1 GALNT1 GALNT13 GALNT7 GALNT3 ST3GAL2 GALNT11 WBSCR17	c2.cp
KEGG_AMINO_SUGAR_AND_NUCLEOTIDE_SUGAR_METABOLISM	0.672195	1	0.308736	0.877963	4863	43	HK2 HK3 GALK1 UGDH NPL RENBP UAP1 GFPT2 FUK CHIT1 NANS GMPPA NAGK AMDHD2 GALE PGM2 GALK2	c2.cp
KEGG_GLYCOSAMINOGLYCAN_DEGRADATION	0.985608	1	0.209381	0.514503	6505	20	HYAL2 HYAL1 NAGLU GUSB HPSE2 HEXB SGSH IDUA HPSE HS3ST3A1	c2.cp
KEGG_GLYCOSAMINOGLYCAN_BIOSYNTHESIS_CHONDROITIN_SULFATE	0.952709	1	0.240614	0.603737	6365	22	CHST3 CHSY1 DSE	c2.cp
KEGG_GLYCEROLIPID_METABOLISM	0.784389	1	-0.255795	-0.823301	2240	40	LIPF DGKB DGKH	c2.cp
KEGG_INOSITOL_PHOSPHATE_METABOLISM	0.97019	1	-0.199518	-0.681161	2505	54	PLCB1 IMPA1 IPMK SYNJ1 PIK3C2A PLCZ1 PIKFYVE PTEN PIK3CA PIK3CB INPP5A PLCB4 INPP4A INPP4B PIP5K1B	c2.cp
KEGG_GLYCOSYLPHOSPHATIDYLINOSITOL_GPI_ANCHOR_BIOSYNTHESIS	0.588199	1	-0.317518	-0.917374	1893	25	PGAP1 PIGW PIGN PIGX GPLD1 PIGB PIGF PIGK	c2.cp
KEGG_GLYCEROPHOSPHOLIPID_METABOLISM	0.651114	1	0.293701	0.900708	4967	69	PLA2G2E PLA2G2A PLA2G12B PLA2G1B PLD1 PLA2G4E GPAT2 PLA2G4B PLD2 PLA2G3 AGPAT2 PTDSS2 MBOAT1 TAZ LPCAT2 PLA2G2C DGKA LPCAT3 LCAT DGKG	c2.cp
KEGG_SPHINGOLIPID_METABOLISM	0.951912	1	0.236915	0.645298	6670	34	SPHK1 GLA UGT8 GAL3ST1 SMPD2	c2.cp
KEGG_GLYCOSPHINGOLIPID_BIOSYNTHESIS_LACTO_AND_NEOLACTO_SERIES	0.882655	1	-0.250836	-0.710576	2925	23	FUT9 B3GALT5 B3GALT2 B3GNT2 B3GALT1 FUT3 FUT2 ST3GAL6 ST3GAL3 ST8SIA1 FUT4	c2.cp
KEGG_GLYCOSPHINGOLIPID_BIOSYNTHESIS_GANGLIO_SERIES	0.919161	1	-0.250812	-0.640004	3285	15	ST6GALNAC5 ST3GAL2 ST8SIA5 ST8SIA1 SLC33A1 ST3GAL5	c2.cp
KEGG_PYRUVATE_METABOLISM	0.998261	1	-0.153571	-0.488027	2870	38	ACOT12 DLAT PKLR DLD	c2.cp
KEGG_PROPANOATE_METABOLISM	0.999856	1	0.148238	0.399379	6950	32	LDHC ACSS2 ACACB ACSS1 HADHA ALDH7A1 LDHA ALDH2 LDHAL6A PCCA MCEE ACAT2 SUCLG1 ACAT1 ECHS1 LDHAL6B	c2.cp
KEGG_RIBOFLAVIN_METABOLISM	0.912863	1	0.276622	0.648311	5939	16	ACPP PHPT1 ENPP1 TYR	c2.cp
KEGG_NICOTINATE_AND_NICOTINAMIDE_METABOLISM	0.970783	1	-0.212381	-0.595048	3222	22	NUDT12 NT5E NMNAT2 NNT NT5C1A AOX1 ENPP3 NMNAT1	c2.cp
KEGG_PANTOTHENATE_AND_COA_BIOSYNTHESIS	0.972246	1	-0.217687	-0.563016	3397	16	PANK3 BCAT1 VNN1 ENPP3 DPYS PANK1 UPB1 PPCS PANK2 PANK4 VNN2 COASY BCAT2 DPYD ENPP1 PPCDC	c2.cp
KEGG_PORPHYRIN_AND_CHLOROPHYLL_METABOLISM	0.977587	1	0.216229	0.570161	6716	28	HMOX1 UGT1A6 UGT2B7 FTH1	c2.cp
KEGG_NITROGEN_METABOLISM	0.739943	1	0.321627	0.811819	4947	23	CA14 CTH HAL GLUL CA1 CA2 CA5B CA7 CA4 CA6	c2.cp
KEGG_AMINOACYL_TRNA_BIOSYNTHESIS	0.601562	1	-0.284108	-0.917584	1693	41	NARS IARS WARS2 SEPSECS VARS2 NARS2 FARSB PARS2 DARS2 FARSA EPRS EARS2 TARS2 WARS SARS DARS IARS2 AARS2 GARS YARS2 PSTK RARS YARS QARS MARS2 FARS2 LARS VARS TARSL2 RARS2 LARS2 HARS2 MARS HARS AARS CARS MTFMT SARS2 KARS CARS2 TARS	c2.cp
KEGG_DRUG_METABOLISM_OTHER_ENZYMES	0.958883	1	0.231229	0.643782	6832	38	TYMP CDA UGT1A6 TK1 UGT2B7 UCKL1 DPYD IMPDH2 GUSB	c2.cp
KEGG_BIOSYNTHESIS_OF_UNSATURATED_FATTY_ACIDS	0.780336	1	0.317436	0.780022	5150	20	SCD ELOVL5 FADS1 TECR ACAA1 FADS2 HADHA	c2.cp
KEGG_ABC_TRANSPORTERS	0.985113	1	-0.193418	-0.633494	2712	44	ABCB11 ABCD2 ABCB10 ABCG8 ABCA4 ABCG2 ABCB4 ABCA5 ABCB5 ABCG4 ABCD3 ABCB9 ABCC12 ABCB1 ABCC5 ABCC1	c2.cp
KEGG_RNA_DEGRADATION	1	1	-0.142451	-0.489718	2547	56	C1D EXOSC6 CNOT7 DCP2 LSM5 TTC37 DIS3 SKIV2L2 PAPOLA CNOT6L MPHOSPH6 ENO2 CNOT6 XRN1 WDR61 DCP1A EXOSC3 CNOT4 DDX6 LSM6 EXOSC5 ZCCHC7 CNOT1 XRN2 CNOT2 PARN CNOT8 LSM4 LSM3 ENO3 EXOSC9 EDC3 PAPOLG EXOSC2 DCP1B LSM1 HSPA9 CNOT10 ENO1 EXOSC7 EXOSC4 PAPD7 DCPS EXOSC10 EXOSC8 CNOT3 LSM2 EXOSC1 PNPT1 EDC4 SKIV2L PATL1 PAPOLB LSM7 NAA38 HSPD1	c2.cp
KEGG_RNA_POLYMERASE	0.999129	1	0.16053	0.425642	6884	29	ZNRD1 POLR2H POLR2J POLR2L POLR2F POLR2G POLR1E POLR2I POLR2C POLR3GL POLR2J3 POLR3H POLR1C	c2.cp
KEGG_BASAL_TRANSCRIPTION_FACTORS	0.983468	1	-0.192226	-0.601636	2914	35	GTF2A1 GTF2H3 TAF13 TAF9B GTF2E1 TBP GTF2H1 TAF1L GTF2H4 TAF2	c2.cp
KEGG_DNA_REPLICATION	0.820415	1	0.280205	0.772402	5810	36	MCM5 RPA4 POLD1 POLE MCM7 POLA1 LIG1 RFC2 PRIM2 POLE4 DNA2 POLD2 POLD4 SSBP1 POLA2 RNASEH2C MCM6 FEN1 MCM3 RNASEH2A	c2.cp
KEGG_PROTEASOME	0.492485	1	0.350674	0.989038	3538	41	PSMB9 PSMB8 PSMB10 PSME1 PSMC4 PSMD13 PSMB1 PSME2 PSMC5 PSMB5 PSMB4 PSMD6 PSMB6 PSMC3 PSME4 PSMD4 PSMB3 PSMB7 PSMF1 PSMA2 PSMD8 PSMD3	c2.cp
KEGG_PROTEIN_EXPORT	0.557201	1	0.373232	0.942074	3725	23	SRP9P1 HSPA5	c2.cp
KEGG_BASE_EXCISION_REPAIR	0.474172	1	0.365022	0.994229	3322	34	POLD1 POLE PARP4 HMGB1P1 NEIL3 APEX2 LIG1 UNG POLE4 MUTYH POLD2 NEIL1 NTHL1 POLD4	c2.cp
KEGG_NUCLEOTIDE_EXCISION_REPAIR	1	1	-0.135583	-0.444069	2753	44	GTF2H3 POLE2 RFC3 GTF2H5 ERCC4 CUL4B RPA3 GTF2H1 RAD23B ERCC8 GTF2H4 CETN2 RFC5 CUL4A POLD3 ERCC2 POLE3 ERCC6 DDB1 GTF2H2 XPA CDK7 RFC4 RPA2 RBX1 MNAT1 RPA1 RAD23A PCNA RFC1 ERCC3 ERCC1 POLD4 POLD2 ERCC5 POLE4 XPC RFC2 LIG1 CCNH DDB2 POLE POLD1 RPA4	c2.cp
KEGG_MISMATCH_REPAIR	0.982055	1	0.21545	0.543816	6566	23	RPA4 POLD1 LIG1 RFC2 POLD2 POLD4 SSBP1 EXO1 MSH6	c2.cp
KEGG_HOMOLOGOUS_RECOMBINATION	0.999854	1	0.139928	0.363493	6833	26	RPA4 POLD1 TOP3B POLD2 POLD4 MUS81 SSBP1 RAD51C RAD51 XRCC3 RAD51B RAD52	c2.cp
KEGG_ERBB_SIGNALING_PATHWAY	0.538393	1	0.305804	0.965016	4248	86	AREG CDKN1A JUN MYC ERBB3 PIK3R5 HBEGF STAT5A EIF4EBP1	c2.cp
KEGG_PHOSPHATIDYLINOSITOL_SIGNALING_SYSTEM	0.950848	1	-0.204829	-0.746448	2185	75	DGKB PLCB1 DGKH ITPR1 IMPA1 SYNJ1 PIK3C2A PLCZ1 CDS1 PRKCA PIKFYVE PTEN DGKI PIK3CA PIK3CB INPP5A PLCB4 PRKCB INPP4A INPP4B PIP5K1B CALM1	c2.cp
KEGG_OOCYTE_MEIOSIS	1	1	0.139243	0.450165	8122	107	PPP3R2 CDK2 RPS6KA1 ITPR3 PTTG2 CCNE2 MOS CDC20 CALML6 REC8 MAD2L2 CDC25C CCNB2 SMC1B PTTG1 SPDYC CDC26 PPP3CC AURKA PRKX	c2.cp
KEGG_UBIQUITIN_MEDIATED_PROTEOLYSIS	0.948422	1	-0.204248	-0.804113	1562	131	UBE2D1 UBE2W KLHL13 CUL5 UBE2Q2 XIAP PARK2 HERC3 UBE2K UBE2B TRIM37 RCHY1 UBE3A MAP3K1 VHL KLHL9 UBA3 UBE2N CDC27 WWP1 PPIL2 SKP2 PIAS2 CBLC UBE2E3 CUL4B HERC4 HERC1 PIAS1 FBXW7 RHOBTB2 FBXW11 ERCC8 UBA6 BIRC6 NEDD4L ANAPC13 NHLRC1 UBA2 CUL2 UBE2D3 UBE3C MGRN1 SIAH1 UBE2G1 FANCL CDC23 UBE2A BIRC2 SMURF2 DET1 HERC2 SKP1 UBE2J1 ANAPC7 ANAPC4 ANAPC1 BTRC CUL7 UBE3B CUL3	c2.cp
KEGG_SNARE_INTERACTIONS_IN_VESICULAR_TRANSPORT	0.688745	1	0.308734	0.859568	4907	38	STX11 VAMP8 STX19 VAMP3 STX4 SNAP23 STX8 VAMP5	c2.cp
KEGG_LYSOSOME	0.471881	1	0.305913	1.00055	3884	118	SLC11A1 CTSE LAPTM5 CD68 TCIRG1 NPC1 GLA ATP6V0A4 CTSH HYAL1 CTSZ ABCA2 MAN2B1 NPC2 NAPSA CD63 CTNS CTSS NAGLU	c2.cp
KEGG_ENDOCYTOSIS	0.472973	1	0.294605	1.00323	4094	176	HSPA6 HSPA1A HSPA1B CXCR4 HSPA2 RAB11FIP1 HLA-C ERBB3 LDLR CCR5 FLT1 PLD1 LDLRAP1 ACAP1 HLA-G CSF1R FGFR4 DNM2 FGFR2 HLA-E EHD4 PLD2 EHD2 EHD1 VPS37B PARD3 ARAP1 HLA-B	c2.cp
KEGG_PEROXISOME	0.999547	1	-0.153925	-0.562569	2205	78	ABCD2 NUDT12 ACSL6 ACSL4 DAO CROT EHHADH FAR1 ACSL3 FAR2 MPV17L PEX3 PXMP4	c2.cp
KEGG_MTOR_SIGNALING_PATHWAY	0.954683	1	-0.208592	-0.700752	2527	50	PRKAA2 IGF1 RPS6KA6 PRKAA1 RICTOR EIF4E CAB39L PIK3CA PIK3CB MAPK1 PDPK1 AKT3 CAB39 RPS6KB1 BRAF RPS6KA3	c2.cp
KEGG_CARDIAC_MUSCLE_CONTRACTION	0.996958	1	-0.17987	-0.647897	2293	72	MYL2 CACNA2D1 CACNB4 TNNC1 CACNG2 ATP1A4 ATP1B1 RYR2 SLC8A1 ACTC1 ATP2A2 SLC9A6 CACNA1S CACNA1D CACNG4 CACNG5	c2.cp
KEGG_VASCULAR_SMOOTH_MUSCLE_CONTRACTION	0.987666	1	0.202709	0.659603	8087	112	PLA2G2E PLA2G2A PPP1R14A PLA2G12B PLA2G1B PLA2G4E ITPR3 PTGIR RAMP1 PLCB3 CALML6 PLA2G4B ARHGEF1 EDNRA PLCB2 GNA13 PLA2G3	c2.cp
KEGG_WNT_SIGNALING_PATHWAY	0.993404	1	0.194048	0.650381	8433	147	FOSL1 PPP3R2 JUN WNT11 RAC2 MYC NFATC1 MMP7 DKK1 DAAM2 WNT3 NFATC3 NFATC2 PLCB3 TCF7 SFRP1 PLCB2 NFATC4 DVL2 NKD1 PSEN1 FZD9 LEF1 PPP3CC FZD5 SFRP2 FRAT2 SOX17 PRKX TCF7L1 AXIN1 FZD8 PPP2R1B	c2.cp
KEGG_DORSO_VENTRAL_AXIS_FORMATION	0.657718	1	-0.305694	-0.875337	2155	24	PIWIL3 PIWIL2	c2.cp
KEGG_HEDGEHOG_SIGNALING_PATHWAY	0.969133	1	0.220465	0.650468	7189	54	WNT11 LRP2 HHIP WNT3 BMP4 IHH DHH BMP8B GLI1 GLI2 SMO PRKX	c2.cp
KEGG_AXON_GUIDANCE	0.815713	1	0.252358	0.831421	6758	127	CXCR4 PPP3R2 RAC2 EFNA1 NFATC1 SEMA3B RHOD SEMA3F PLXNB3 PLXNB1 NFATC3 RND1 NFATC2 FES UNC5B SEMA4D EFNB1 EPHA2 EFNA2 RGS3 SEMA6A LIMK2 SEMA4C	c2.cp
KEGG_FOCAL_ADHESION	0.826428	1	0.244964	0.843315	7260	197	SPP1 COL2A1 ITGB3 THBS1 JUN RAC2 PARVG ITGA5 PIK3R5 ITGB4 FLT1 FLNC LAMA5 TNC VASP PXN COL1A1 COL4A1 ITGA10 VEGFA MYL12A VAV1 COMP THBS2 ITGA2 TLN1 COL4A2 BIRC3 MYLPF FLNA DOCK1 VWF ACTN3 LAMB2 COL6A2 BCAR1 COL4A4 LAMA1 ITGB7 PIK3CG ITGB5 PGF ITGA11 COL6A1 PDGFRB TNXB FLT4 ZYX ILK COL11A2 ITGB1 COL5A3 ITGA6 FLNB	c2.cp
KEGG_ADHERENS_JUNCTION	0.609849	1	0.302331	0.925073	4643	68	SNAI1 PTPN6 RAC2 WAS WASF2 CTNNA3 SNAI2 TCF7 CDH1 PARD3 IQGAP1 ACTN3 CTNNA1 LEF1 FGFR1 TCF7L1 INSR FARP2 ERBB2 TJP1 CSNK2B RAC3 VCL PTPN1	c2.cp
KEGG_TIGHT_JUNCTION	0.878909	1	0.240787	0.791749	7279	124	MYH6 CLDN11 CLDN19 HCLS1 CLDN5 TJP2 CLDN2 F11R CLDN6 LLGL2 RAB13 LLGL1 MYL12A TJAP1 CGN JAM3 CTNNA3 RRAS MYH7 MYLPF PARD3 ACTN3 CTNNA1 CLDN7 CLDN23 MYH9 MYH3 PARD6G CLDN10	c2.cp
KEGG_GAP_JUNCTION	0.696667	1	-0.242426	-0.902481	1462	88	HTR2C GUCY1A2 PLCB1 PDGFD DRD2 HTR2A HTR2B ITPR1 PDGFRA GUCY1A3 PRKACB ADCY1 KRAS PRKCA GRM1 GNAQ NRAS DRD1 PDGFC MAPK1 PLCB4 PRKCB PRKG2	c2.cp
KEGG_RIG_I_LIKE_RECEPTOR_SIGNALING_PATHWAY	0.54725	1	0.315692	0.954198	4128	63	CXCL10 IFNK IRF7 IFNA10 NFKBIA TNF IKBKE IFNA13 IFNE RELA IFNW1 MAPK13 NFKBIB ISG15 IL12A NFKB1 RIPK1 TRADD RNF125	c2.cp
KEGG_NEUROTROPHIN_SIGNALING_PATHWAY	0.97655	1	0.211656	0.695377	8078	123	NGFR JUN PIK3R5 NFKBIA RPS6KA1 MAPKAPK2 IRAK3 RIPK2 IRAK2 RELA NFKBIE CALML6 MAPK13 ARHGDIB SH2B3 ATF4 ZNF274 NFKBIB BDNF NFKB1 NGF PSEN1 SH2B2 PIK3CG PLCG1 GAB1 IRAK4 ABL1 MAPK7	c2.cp
KEGG_LONG_TERM_DEPRESSION	0.85059	1	0.255924	0.784856	6489	69	PLA2G2E PLA2G2A PLA2G12B PLA2G1B PLA2G4E ITPR3 LYN PLCB3 PLA2G4B GRM5 PLCB2 GNA13 PLA2G3	c2.cp
KEGG_TASTE_TRANSDUCTION	0.973964	1	-0.199809	-0.627514	2842	36	TAS2R31 TAS2R14 PRKACB TRPM5 GNG13 TAS2R10 TAS2R8 PDE1A KCNB1 TAS2R20 CACNA1B GNB1 GRM4 TAS2R4 TAS2R13 GNG3 TAS2R5	c2.cp
KEGG_REGULATION_OF_ACTIN_CYTOSKELETON	0.77779	1	0.251614	0.869512	6877	207	ITGB3 CD14 RAC2 ITGAX ITGB2 ITGA5 SCIN PIK3R5 FGF4 ITGAM NCKAP1L ITGB4 INSRR BDKRB1 WAS BDKRB2 GSN PXN MSN ITGA10 MYL12A VAV1 FGFR4 ARPC1B PIP4K2A FGFR2 WASF2 MOS RRAS ITGA2 EZR MYLPF ARHGEF1 ITGAL LIMK2 DOCK1 GNA13 IQGAP1 FGF11 ACTN3 FGF1 BCAR1 SSH3 MYH9 FGF17 ITGB7 PIK3CG ITGB5 ITGA11 PFN1 ARAF	c2.cp
KEGG_INSULIN_SIGNALING_PATHWAY	0.793586	1	0.255149	0.84529	6631	132	SOCS3 SOCS1 TRIP10 HK2 PIK3R5 PPP1R3C SREBF1 LIPE PCK1 EIF4EBP1 PPP1R3B SLC2A4 PHKG1 INPP5D MKNK2 HK3 PYGL CALML6	c2.cp
KEGG_PROGESTERONE_MEDIATED_OOCYTE_MATURATION	1	1	0.121077	0.380409	7853	83	PIK3R5 CDK2 RPS6KA1 CCNB3 MOS MAPK13 MAD2L2 CDC25C CCNB2 SPDYC PIK3CG CDC26 ARAF HSP90AA1 PRKX	c2.cp
KEGG_MELANOGENESIS	0.600103	1	-0.249335	-0.9418	1168	98	WNT8A KITLG PLCB1 DCT FZD3 KIT WNT1 PRKACB WNT7B TYRP1 CAMK2D ADCY1 KRAS PRKCA GSK3B POMC GNAQ NRAS FZD7 WNT9A MAPK1 WNT7A PLCB4 CREB1 PRKCB	c2.cp
KEGG_ADIPOCYTOKINE_SIGNALING_PATHWAY	0.444956	1	0.332326	1.01492	3382	67	SOCS3 TNFRSF1B NFKBIA ACSL5 PCK1 NPY TNF SLC2A4 ACSL1 ADIPOR2 RELA NFKBIE SLC2A1 TNFRSF1A CPT1B STAT3 NFKBIB LEP NFKB1 ACACB TRADD	c2.cp
KEGG_ALDOSTERONE_REGULATED_SODIUM_REABSORPTION	0.562211	1	0.336464	0.943705	4016	40	SFN SGK1 PIK3R5 FXYD4	c2.cp
KEGG_VASOPRESSIN_REGULATED_WATER_REABSORPTION	0.96094	1	0.226409	0.641237	6912	42	AQP3 CREB5 CREB3L2 ARHGDIB STX4 DYNLL1 PRKX CREB3L4 ARHGDIA AVPR2 AVP AQP4 ADCY3 DYNC1I2	c2.cp
KEGG_PROXIMAL_TUBULE_BICARBONATE_RECLAMATION	0.98026	1	0.21762	0.549295	6554	23	AQP1 PCK1 CA2 ATP1B3 SLC38A3 FXYD2 CA4 PCK2	c2.cp
KEGG_ALZHEIMERS_DISEASE	0.958333	1	0.218214	0.735318	8210	154	IL1B PPP3R2 TNF ITPR3 APOE BACE2 COX4I2 PLCB3 CALML6 GRIN2C COX8C TNFRSF1A PLCB2 NDUFB7 FAS NDUFA3 CASP7 PSEN1 COX6B1 ERN1 NDUFA4L2 NDUFB10 PPP3CC ATP5D COX4I1 EIF2AK3 ATP5E NDUFA1 NDUFS5 UQCR11 LPL CASP9 HSD17B10 NDUFB4 UQCRQ ATP5J COX6A1 NDUFS7 UQCR10 COX5A UQCRB NDUFB8 ATP5O UQCRH NDUFV2 NDUFB1 CAPN2 COX7C COX7A1 ATP2A1 ATP5H NDUFB3 ATP5G2 BID NDUFS8 NDUFB9 NDUFB2 CALML3 COX7B NDUFS4 COX5B NDU…	c2.cp
KEGG_PARKINSONS_DISEASE	1	1	0.157443	0.511921	8184	111	GPR37 COX4I2 COX8C NDUFB7 NDUFA3 COX6B1 NDUFA4L2 NDUFB10 ATP5D COX4I1 ATP5E NDUFA1 NDUFS5 UQCR11 CASP9 NDUFB4 UQCRQ ATP5J COX6A1 NDUFS7 UQCR10 COX5A UQCRB NDUFB8 ATP5O UQCRH NDUFV2 NDUFB1 COX7C COX7A1 UBE2L6 ATP5H NDUFB3 ATP5G2 NDUFS8 NDUFB9 NDUFB2 COX7B NDUFS4 COX5B NDUFA6 UBB COX7A2 SDHB NDUFS6 UBA7 NDUFC1 PARK7 NDUFAB1 SDHA NDUFA2	c2.cp
KEGG_AMYOTROPHIC_LATERAL_SCLEROSIS_ALS	0.813137	1	0.271023	0.794656	5978	52	TNFRSF1B PPP3R2 TNF MAP2K3 GRIN2C TNFRSF1A MAPK13 GPX1 CASP1	c2.cp
KEGG_HUNTINGTONS_DISEASE	0.967455	1	0.213366	0.72563	8382	171	UCP1 CREB5 TGM2 COX4I2 TBPL2 CREB3L2 HIP1 PLCB3 COX8C GRM5 PPARG GPX1 PLCB2 NDUFB7 BDNF HDAC1 NDUFA3 POLR2H BBC3 COX6B1 NDUFA4L2 POLR2J NDUFB10 ATP5D SP1 COX4I1 ATP5E CREB3L4 NDUFA1 NDUFS5 UQCR11 POLR2L CASP9 POLR2F NDUFB4 CLTCL1 UQCRQ ATP5J COX6A1 NDUFS7 UQCR10 POLR2G COX5A UQCRB BAX NDUFB8 ATP5O UQCRH NDUFV2 NDUFB1 COX7C COX7A1 ATP5H NDUFB3 REST ATP5G2 POLR2I AP2S1 NDUFS8 NDUFB9 NDUFB2 POLR2C C…	c2.cp
KEGG_VIBRIO_CHOLERAE_INFECTION	0.894343	1	0.25021	0.730427	6576	50	TCIRG1 TJP2 ATP6V0A4 ATP6V0E1 CFTR KCNQ1 PDIA4 PLCG1 PRKX SEC61B TJP1 KDELR3 ADCY3 ATP6V0D2 ATP6V0B PLCG2 ACTB ACTG1 ATP6V0C ATP6V1F SEC61A1 ATP6V1C2	c2.cp
KEGG_PATHWAYS_IN_CANCER	0.501237	1	0.278795	0.994945	4659	317	FOS CDKN1A JUN NFKB2 SPI1 WNT11 PTGS2 RAC2 CSF2RA MYC TGFB1 IL6 RUNX1 PIK3R5 FGF4 NFKBIA CDK2 STAT5A CSF3R PLD1 LAMA5 MMP9 CDKN2A HHIP WNT3 ETS1 FLT3LG MMP1 JUP COL4A1 TRAF4 BMP4 VEGFA CSF1R CCNE2 FGFR2 RELA CTNNA3 TGFB3 ITGA2 CEBPA SLC2A1 TCF7 CDH1 TGFA MECOM COL4A2 BIRC3 RALGDS PPARG RASSF1 DAPK2 TRAF1 FGF11 STAT3 EGLN3 FGF1 LAMB2 CTNNA1 GSTP1 HDAC1 FAS DVL2 NFKB1 COL4A4 GLI1 FZD9 GLI2 FGF17 FO…	c2.cp
KEGG_RENAL_CELL_CARCINOMA	0.953277	1	0.22425	0.683282	7242	66	JUN TGFB1 PIK3R5 ETS1 VEGFA TGFB3 SLC2A1 TGFA EGLN3 PIK3CG PGF ARAF GAB1 VEGFC PIK3R3 HGF ARNT PDGFB VEGFB FLCN EGLN2 RAF1 AKT2 MAPK3 PIK3CD HIF1A PAK2 PAK4 PIK3R2 RAPGEF1	c2.cp
KEGG_PANCREATIC_CANCER	0.691481	1	0.286682	0.879182	5275	69	RAC2 TGFB1 PIK3R5 PLD1 CDKN2A VEGFA RELA TGFB3 TGFA RALGDS STAT3 NFKB1 PIK3CG PGF ARAF CASP9 VEGFC ERBB2 IKBKB PIK3R3 CDK4 RAC3 VEGFB TGFBR1 BCL2L1 TP53 RAF1 AKT2 MAPK3 PIK3CD RAD51	c2.cp
KEGG_ENDOMETRIAL_CANCER	0.993336	1	0.192953	0.56575	7303	52	MYC PIK3R5 CTNNA3 TCF7 CDH1 CTNNA1 PIK3CG LEF1 ARAF TCF7L1 AXIN1 CASP9 ILK	c2.cp
KEGG_GLIOMA	0.995905	1	-0.176118	-0.622296	2431	64	IGF1 PDGFRA E2F3 CAMK2D KRAS PRKCA PTEN PIK3CA NRAS PIK3CB MAPK1 RB1 PRKCB AKT3 SHC3 CALM1 SOS1 CCND1 BRAF	c2.cp
KEGG_PROSTATE_CANCER	0.822329	1	0.256382	0.809972	6488	87	CDKN1A PIK3R5 NFKBIA CDK2 INSRR CREB5 CCNE2 FGFR2 RELA CREB3L2 TCF7 TGFA ATF4 GSTP1 NFKB1 FOXO1 PIK3CG LEF1 ARAF HSP90AA1 PDGFRB FGFR1 HSP90B1 CREB3L4 TCF7L1 CASP9	c2.cp
KEGG_THYROID_CANCER	0.992019	1	0.192191	0.509592	6835	29	MYC TCF7 CDH1 PPARG LEF1 TCF7L1	c2.cp
KEGG_BASAL_CELL_CARCINOMA	0.984499	1	0.207137	0.611145	7303	54	WNT11 HHIP WNT3 BMP4 TCF7 DVL2 GLI1 FZD9 GLI2 SMO LEF1 FZD5 TCF7L1 AXIN1 FZD8	c2.cp
KEGG_MELANOMA	0.729764	1	-0.245616	-0.879666	1730	69	FGF6 FGF23 IGF1 PDGFD FGF9 FGF12 PDGFRA E2F3 KRAS PTEN PIK3CA NRAS PDGFC PIK3CB MAPK1 FGF14 RB1 FGF13 FGF7 AKT3 MET	c2.cp
KEGG_CHRONIC_MYELOID_LEUKEMIA	0.527355	1	0.313528	0.968548	4057	73	CDKN1A MYC TGFB1 RUNX1 PIK3R5 NFKBIA STAT5A CDKN2A RELA TGFB3 MECOM HDAC1 GAB2 NFKB1 PIK3CG ARAF	c2.cp
KEGG_SMALL_CELL_LUNG_CANCER	0.79454	1	0.261996	0.824501	6256	84	PTGS2 MYC PIK3R5 NFKBIA CDK2 LAMA5 COL4A1 TRAF4 CCNE2 RELA ITGA2 COL4A2 BIRC3 TRAF1 LAMB2 NFKB1 COL4A4 LAMA1 PIK3CG CASP9 ITGB1 ITGA6 LAMC1 ITGA2B	c2.cp
KEGG_NON_SMALL_CELL_LUNG_CANCER	0.996129	1	-0.168657	-0.5758	2572	54	RARB E2F3 KRAS PRKCA PIK3CA NRAS PIK3CB MAPK1 RB1 PRKCB PDPK1 AKT3 SOS1 CCND1 BRAF	c2.cp
KEGG_HYPERTROPHIC_CARDIOMYOPATHY_HCM	0.906417	1	0.238538	0.749457	7118	83	ITGB3 MYH6 LMNA ITGA5 TGFB1 IL6 ITGB4 TNF ITGA10 MYL3 MYH7 TGFB3 ITGA2 EMD SGCA TPM4 TPM2 CACNA2D4 ITGB7 ITGB5 ITGA11	c2.cp
KEGG_ARRHYTHMOGENIC_RIGHT_VENTRICULAR_CARDIOMYOPATHY_ARVC	0.908643	1	0.239782	0.742255	7011	74	ITGB3 LMNA ITGA5 ITGB4 DSP JUP ITGA10 CTNNA3 ITGA2 TCF7 EMD SGCA ACTN3 CTNNA1 CACNA2D4 ITGB7 ITGB5 LEF1 ITGA11 TCF7L1 ITGB1 ITGA6	c2.cp
KEGG_DILATED_CARDIOMYOPATHY	0.975173	1	0.212293	0.672424	7737	89	ITGB3 MYH6 LMNA ITGA5 TGFB1 ITGB4 TNF ITGA10 MYL3 MYH7 TGFB3 ITGA2 EMD SGCA TPM4 TPM2 CACNA2D4 ITGB7 ITGB5 ITGA11 PRKX	c2.cp
BIOCARTA_NO1_PATHWAY	0.49688	1	0.370625	0.982706	3423	29	NOS3 ACTA1 FLT1 BDKRB2 VEGFA	c2.cp
BIOCARTA_ARAP_PATHWAY	0.987146	1	0.203079	0.481595	6450	17	CYTH4 CYTH1 ARFGAP3 KDELR3 CLTB ASAP2 ARFGAP1 CYTH2 ARF1 COPA	c2.cp
BIOCARTA_AGR_PATHWAY	0.480392	1	0.362692	0.993237	3380	35	JUN ACTA1 MUSK PXN	c2.cp
BIOCARTA_AKT_PATHWAY	0.832787	1	-0.270352	-0.749666	2793	21	FASLG	c2.cp
BIOCARTA_ALK_PATHWAY	0.743894	1	0.298807	0.823679	5268	36	NKX2-5 GATA4 TGFB1 BMP4 TGFB3 SMAD6 NPPA	c2.cp
BIOCARTA_AT1R_PATHWAY	0.854426	1	-0.248042	-0.760045	2605	32	ATF2 PRKCA MEF2C GNAQ MAP3K1 MAPK1 PRKCB MAP2K4 CALM1 SOS1 MEF2A	c2.cp
BIOCARTA_CHEMICAL_PATHWAY	0.978599	1	0.218181	0.547448	6538	22	PXN TLN1 CASP6 CASP7 CASP9 BAX BID BCL2L1 TP53	c2.cp
BIOCARTA_BIOPEPTIDES_PATHWAY	1	1	0.13513	0.381121	7185	41	AGTR2 STAT5A AGT STAT3 PLCG1 STAT6	c2.cp
BIOCARTA_CARM_ER_PATHWAY	0.95108	1	-0.213937	-0.669586	2818	35	HDAC9 GTF2A1 MEF2C GRIP1 NRIP1 PPARGC1A CCND1 GTF2E1 TBP EP300	c2.cp
BIOCARTA_CASPASE_PATHWAY	0.795723	1	0.305184	0.770314	5320	23	LMNA CASP4 BIRC3 ARHGDIB CASP1 CASP6 CASP7 CASP2 CASP9 CASP10 LMNB1 DFFB	c2.cp
BIOCARTA_MCM_PATHWAY	0.947786	1	0.253347	0.608356	6207	18	CDK2 MCM5 MCM7	c2.cp
BIOCARTA_CERAMIDE_PATHWAY	0.982341	1	0.212989	0.534422	6563	22	RELA TNFRSF1A NFKB1 RIPK1 TRADD BAX RAF1 MAPK3 TRAF2	c2.cp
BIOCARTA_HDAC_PATHWAY	0.977485	1	0.219106	0.572749	6685	27	NFATC1 MYOD1 NFATC2 PIK3CG PPP3CC INSR MAPK7	c2.cp
BIOCARTA_GCR_PATHWAY	0.655725	1	0.361307	0.867599	4294	18	NOS3 RELA NPPA NFKB1 PIK3CG HSP90AA1	c2.cp
BIOCARTA_CTCF_PATHWAY	0.660087	1	0.345943	0.873195	4413	23	MYC TGFB1 CDKN2A TGFB3	c2.cp
BIOCARTA_CXCR4_PATHWAY	0.938837	1	0.251389	0.634529	6277	23	CXCR4 PXN RELA BCAR1 NFKB1 PLCG1	c2.cp
BIOCARTA_CALCINEURIN_PATHWAY	0.660611	1	0.359782	0.863935	4326	18	CDKN1A NFATC1 NFATC3 NFATC2 NFATC4 PLCG1 PPP3CC SP1	c2.cp
BIOCARTA_EGF_PATHWAY	0.544958	1	0.354484	0.951086	3787	31	FOS JUN STAT5A	c2.cp
BIOCARTA_NDKDYNAMIN_PATHWAY	0.607474	1	-0.33464	-0.891763	2096	18	PPP3CA SYNJ1 EPS15 PPP3CB	c2.cp
BIOCARTA_ECM_PATHWAY	0.992678	1	-0.176691	-0.505945	3253	24	MYL2 ARHGAP5 PIK3CA MAPK1	c2.cp
BIOCARTA_ERK_PATHWAY	0.508626	1	0.373085	0.975252	3478	27	NGFR MYC RPS6KA1 MKNK2 STAT3 NGF	c2.cp
BIOCARTA_EIF_PATHWAY	0.894993	1	-0.263403	-0.681255	3127	16	EIF1AX EIF4E EIF4G3 EIF4G2 EIF4A2 EIF3A EEF2K EIF2S1	c2.cp
BIOCARTA_FAS_PATHWAY	0.815706	1	0.287378	0.766319	5629	30	JUN LMNA RIPK2 ARHGDIB CFLAR CASP6 FAS CASP7	c2.cp
BIOCARTA_MPR_PATHWAY	0.939344	1	-0.222321	-0.68123	2864	32	PRKAR2B ACTR2 PRKACB PRKAR1A ADCY1 PGR MAPK1 ARPC5 GNAI1 ACTR3 CDK1 GNB1 PRKAR2A MYT1	c2.cp
BIOCARTA_HCMV_PATHWAY	0.97873	1	0.221358	0.524941	6395	17	MAP2K3 RELA NFKB1 PIK3CG SP1	c2.cp
BIOCARTA_IL7_PATHWAY	0.76404	1	0.332084	0.787525	4992	17	STAT5A LCK IL2RG PIK3CG NMI JAK3	c2.cp
BIOCARTA_GSK3_PATHWAY	0.607018	1	0.347973	0.90961	4151	27	LBP CD14 MYD88 RELA NFKB1 LEF1 AXIN1	c2.cp
BIOCARTA_RACCYCD_PATHWAY	0.468471	1	0.386031	1.0028	3201	26	CDKN1A NFKBIA CDK2 RELA NFKB1	c2.cp
BIOCARTA_PYK2_PATHWAY	0.997526	1	0.177406	0.467791	6853	28	JUN MAP2K3 BCAR1 PLCG1	c2.cp
BIOCARTA_MCALPAIN_PATHWAY	0.502528	1	0.38526	0.982607	3378	24	CXCR3 ACTA1 CAPNS2 PXN EZR TLN1	c2.cp
BIOCARTA_MTOR_PATHWAY	0.857014	1	-0.261011	-0.739401	2840	23	EIF4E PTEN PIK3CA PDPK1 EIF4G3 RPS6KB1 EIF4G2 PIK3R1 PPP2CA EIF4A2 PDK2	c2.cp
BIOCARTA_PITX2_PATHWAY	0.799595	1	0.327651	0.754927	5138	15	PITX2 HDAC1 LEF1 AXIN1	c2.cp
BIOCARTA_VIP_PATHWAY	0.498378	1	0.382276	0.984009	3379	25	EGR2 MYC NFATC1 NFKBIA NFATC2 RELA NFKB1 PLCG1 PPP3CC	c2.cp
BIOCARTA_RARRXR_PATHWAY	0.767832	1	-0.307063	-0.783541	2744	15	GTF2A1 NCOA2 GTF2E1 TBP	c2.cp
BIOCARTA_P38MAPK_PATHWAY	0.457227	1	0.361786	1.01104	3254	39	HSPB1 MYC TGFB1 DDIT3 MAPKAPK2 TGFB3 RIPK1 HSPB2 TRADD	c2.cp
BIOCARTA_PDGF_PATHWAY	0.687428	1	0.319541	0.860895	4778	32	FOS JUN STAT5A STAT3 PIK3CG PLCG1 STAT6	c2.cp
BIOCARTA_PTDINS_PATHWAY	0.991925	1	0.198704	0.501548	6632	23	BTK LYN JAG1 PLCG1 PFKL	c2.cp
BIOCARTA_EDG1_PATHWAY	0.809656	1	0.29546	0.767517	5533	26	ITGB3 SPHK1 SMPD2	c2.cp
BIOCARTA_MYOSIN_PATHWAY	0.51129	1	-0.319509	-0.965661	1584	30	MYL2 PLCB1 MYL7 ARHGAP5 PRKCA GNAQ PRKCB ARHGEF12	c2.cp
BIOCARTA_PROTEASOME_PATHWAY	0.846056	1	-0.258347	-0.768263	2648	28	UBE3A PSMA5 PSMD12 UBE2A PSMD11 PSMC6 PSMA3 PSMA4 PSMB2 PSMD14 PSMC2 PSMA1 UBA1 PSMA6 PSMA7 RPN2 PSMD8 PSMA2 RPN1 PSMB7 PSMB3 PSMC3 PSMB6 PSMD6 PSMB4 PSMB5 PSMB1 PSMC4	c2.cp
BIOCARTA_RAC1_PATHWAY	0.899246	1	-0.244282	-0.692009	2980	23	MYL2 PDGFRA WASF1 MAP3K1 PIK3CA CDK5R1	c2.cp
BIOCARTA_RAS_PATHWAY	0.594437	1	0.363431	0.917334	3974	23	PLD1 RELA RALGDS FOXO4 NFKB1 PIK3CG CASP9 BCL2L1 RAF1 MAPK3 ELK1 HRAS RAC1 AKT1 RHOA	c2.cp
BIOCARTA_NKCELLS_PATHWAY	0.634519	1	-0.320667	-0.880317	2157	20	KLRC1 KLRC4 KLRC2	c2.cp
BIOCARTA_PML_PATHWAY	0.708682	1	-0.316637	-0.830326	2456	17	FASLG PAX3	c2.cp
BIOCARTA_RHO_PATHWAY	0.987541	1	-0.188079	-0.576308	3011	32	MYL2 ARHGAP5 ACTR2	c2.cp
BIOCARTA_ATRBRCA_PATHWAY	0.985298	1	-0.196608	-0.539742	3350	20	FANCF RAD1 NBN FANCD2 RAD50 RAD17 ATR BRCA2	c2.cp
BIOCARTA_HER2_PATHWAY	0.942831	1	0.24846	0.623423	6299	22	IL6 ERBB3 IL6R STAT3 PIK3CG	c2.cp
BIOCARTA_ERK5_PATHWAY	0.97606	1	-0.215337	-0.564685	3383	17	NTRK1 MEF2C PIK3CA MAPK1 CREB1 MEF2A	c2.cp
BIOCARTA_MEF2D_PATHWAY	0.909008	1	0.274271	0.658602	5953	18	NFATC1 CAPNS2 NFATC2 HDAC1 PPP3CC	c2.cp
BIOCARTA_MITOCHONDRIA_PATHWAY	0.946592	1	0.246235	0.612114	6291	21	BIRC3 CASP6 BAK1 CASP7 CASP9 BAX DFFB BID ENDOG DIABLO BCL2L1	c2.cp
BIOCARTA_CDC42RAC_PATHWAY	0.448355	1	-0.387835	-1.00308	1566	16	ACTR2 PDGFRA WASL PIK3CA ARPC5 ACTR3 PIK3R1	c2.cp
BIOCARTA_MET_PATHWAY	0.48812	1	0.356592	0.987773	3471	37	FOS JUN ACTA1 PXN DOCK1 STAT3 PIK3CG GAB1 ITGB1 MAP4K1	c2.cp
BIOCARTA_GPCR_PATHWAY	0.689442	1	0.318822	0.858959	4792	32	FOS JUN NFATC1 NFATC3 NFATC2	c2.cp
BIOCARTA_IGF1MTOR_PATHWAY	0.723611	1	-0.300043	-0.823697	2460	20	IGF1 EIF4E GSK3B PTEN PIK3CA PDPK1 RPS6KB1 PIK3R1 PPP2CA PDK2	c2.cp
BIOCARTA_SHH_PATHWAY	0.576783	1	-0.35785	-0.913137	2061	15	PRKAR2B PRKACB PRKAR1A GSK3B PTCH1 PRKAR2A DYRK1A DYRK1B	c2.cp
BIOCARTA_SPRY_PATHWAY	0.769699	1	-0.296037	-0.788891	2656	18	RASA1 SPRY4 SPRY3 MAPK1 SOS1 PTPRB MAP2K1 EGF	c2.cp
BIOCARTA_STATHMIN_PATHWAY	0.750229	1	0.331981	0.797179	4913	18	CD3D CD3G MAPK13	c2.cp
BIOCARTA_TALL1_PATHWAY	0.973238	1	0.23338	0.53772	6254	15	TNFRSF17 RELA NFKB1	c2.cp
BIOCARTA_TEL_PATHWAY	0.974046	1	0.227931	0.547325	6379	18	MYC TEP1 HSP90AA1	c2.cp
BIOCARTA_TGFB_PATHWAY	0.835641	1	0.301929	0.732636	5490	19	TGFB1 TGFB3 CDH1 SMAD7	c2.cp
BIOCARTA_PAR1_PATHWAY	0.991811	1	0.195789	0.539703	7024	36	F2RL3 ARHGEF1 GNA13 ARHGEF10 ARHGEF15 PIK3CG ARHGEF16 GNA12	c2.cp
BIOCARTA_TNFR1_PATHWAY	0.491511	1	0.371918	0.986134	3386	29	JUN LMNA TNF TNFRSF1A ARHGDIB RIPK1 TRADD CASP2	c2.cp
BIOCARTA_TPO_PATHWAY	0.507139	1	0.383884	0.979097	3409	24	FOS JUN STAT5A STAT3 PIK3CG PLCG1	c2.cp
BIOCARTA_TFF_PATHWAY	0.680388	1	-0.309854	-0.850631	2313	20	GHR PIK3CA MAPK1 APAF1 CYCS SOS1 PIK3R1 CTNNB1	c2.cp
BIOCARTA_ARF_PATHWAY	0.716297	1	0.346719	0.822232	4680	17	MYC CDKN2A TBX2 PIK3CG ABL1	c2.cp
BIOCARTA_VEGF_PATHWAY	0.654622	1	0.330875	0.87731	4510	29	NOS3 FLT1 PXN VEGFA EIF2B4 PIK3CG PLCG1 FLT4 EIF2B2 EIF1 KDR ARNT EIF2S2 SHC1 EIF2B5	c2.cp
BIOCARTA_WNT_PATHWAY	0.981686	1	-0.199899	-0.581721	3108	26	WIF1 WNT1 NLK GSK3B CCND1 APC CSNK1A1 PPP2CA CTNNB1 MAP3K7 FZD1 BTRC	c2.cp
BIOCARTA_ACTINY_PATHWAY	0.90153	1	0.272886	0.670552	5950	20	ACTA1 ARPC1B WASF2 PIR	c2.cp
ST_WNT_CA2_CYCLIC_GMP_PATHWAY	0.682624	1	0.346154	0.850591	4505	20	TF ITPKB ITPR3 SLC6A13 PDE6B PDE6G	c2.cp
ST_ERK1_ERK2_MAPK_PATHWAY	0.547612	1	0.352401	0.949426	3806	32	RPS6KA1 CREB5 MAP3K8 MKNK2 MOS KLF6 DUSP6 NFKB1 ARAF KAT5	c2.cp
ST_G_ALPHA_S_PATHWAY	0.905244	1	0.28468	0.65592	5817	15	GAST CREB5 RAPGEF3	c2.cp
ST_G_ALPHA_I_PATHWAY	0.971604	1	0.222973	0.607323	6808	34	PITX2 ITPKB ITPR3 PLCB3 PLCB2 STAT3	c2.cp
SIG_CHEMOTAXIS	0.981236	1	0.20893	0.596324	7111	44	PITX2 PIK3R5 BTK ITPR3 RPS4X INPPL1 ANGPTL2 ARHGAP4 PIK3CG	c2.cp
SIG_IL4RECEPTOR_IN_B_LYPHOCYTES	0.736696	1	0.313926	0.820609	5038	27	SOCS1 IL4R STAT6 MAP4K1 JAK3 SHC1 RAF1 AKT2 MAPK3 PIK3CD	c2.cp
WNT_SIGNALING	0.438292	1	0.322362	1.01727	3458	86	T FOSL1 PITX2 WISP1 JUN WNT11 MYC FGF4 DKK1 RHOU WNT3	c2.cp
SIG_REGULATION_OF_THE_ACTIN_CYTOSKELETON_BY_RHO_GTPASES	0.862419	1	0.271291	0.734723	6023	33	FSCN3 FLNC VASP RPS4X FLNA ANGPTL2 PFN1	c2.cp
ST_ADRENERGIC	0.932367	1	0.246613	0.675353	6561	35	PITX2 GAST ITPKB ITPR3 PTX3 GNA15 CCL13 KCNJ5 ITPKA CFB	c2.cp
ST_INTEGRIN_SIGNALING_PATHWAY	1	1	0.151423	0.474061	7818	81	ITGA5 WAS VASP CDKN2A ITGA10 GRB7 ITGA2 TLN1 DOCK1 BCAR1 ANGPTL2 PLCG1 ITGA11 ZYX ABL1 ILK ITGA6 MAP3K11	c2.cp
ST_GA13_PATHWAY	0.658426	1	0.320758	0.878401	4633	35	NFKB2 NFKBIA PLD1 NFKBIE PLD2 GNA13 NFKBIB NFKB1 TBXA2R TONSL CFB NFKBIL1 PHKA2 ROCK1 RDX SRF AKT2	c2.cp
SIG_INSULIN_RECEPTOR_PATHWAY_IN_CARDIAC_MYOCYTES	0.892575	1	0.250621	0.731626	6563	50	SFN RPS6KA1 CDKN2A SLC2A4 SERPINB6 PARD3 INPPL1 FOXO1 F2RL2 BRD4	c2.cp
ST_WNT_BETA_CATENIN_PATHWAY	0.980594	1	0.212206	0.577996	6871	34	DKK1 MVP TSHB SFRP1 NKD1 PSEN1 AXIN1 DACT1	c2.cp
ST_JNK_MAPK_PATHWAY	0.655289	1	0.315977	0.883021	4664	39	JUN GADD45A DUSP10 IL1R1 NFATC3	c2.cp
ST_MYOCYTE_AD_PATHWAY	0.871544	1	0.276048	0.71709	5956	26	PITX2 GAST ITPR3 PTX3 KAT5 KCNJ5 CFB ADRB1	c2.cp
PID_FANCONI_PATHWAY	0.982285	1	-0.190678	-0.62076	2716	43	FANCF RMI1 RAD1 RFC3 NBN FANCD2 RAD50 USP1 TOPBP1 FBXW11 WDR48 BRIP1 RAD17 ATR BRCA2 FANCL FANCM	c2.cp
PID_ENDOTHELIN_PATHWAY	0.790192	1	0.271536	0.820734	5961	63	FOS EDN2 JUN MMP1 PLCB3 EDNRA PLCB2 CYSLTR2 BCAR1 GNA15	c2.cp
PID_ERBB4_PATHWAY	0.716968	1	-0.270609	-0.859955	2061	38	PRLR NRG4 BTC ERBB4 GRIN2B PIK3CA PIK3CB MAPK1 WWP1	c2.cp
PID_AURORA_B_PATHWAY	0.939152	1	-0.220566	-0.700927	2700	38	NCAPG KLHL13 RASA1 BUB1 KLHL9 EVI5 SMC2	c2.cp
PID_INSULIN_PATHWAY	0.952401	1	0.229932	0.65627	6902	44	TRIP10 SGK1 EIF4EBP1 INPP5D DOK1 EXOC7 SH2B2 F2RL2 GRB14 INSR	c2.cp
PID_NOTCH_PATHWAY	0.800268	1	0.271588	0.80838	5977	57	CDKN1A PTCRA MYC DLL4 DLK1 DLL1 NOTCH1 NOTCH4 HDAC1 PSEN1 JAG1	c2.cp
PID_WNT_NONCANONICAL_PATHWAY	0.99813	1	0.173756	0.468126	6938	32	NFATC2 PPARG FLNA CHD7 DVL2 FZD5 ARRB2 FZD2 TAB2 ROCK1 SETDB1	c2.cp
PID_HDAC_CLASSII_PATHWAY	0.99768	1	-0.164553	-0.507587	3009	33	HDAC9 CAMK4 MEF2C GNG2 NR3C1 XPO1	c2.cp
PID_BETA_CATENIN_DEG_PATHWAY	0.973176	1	-0.217737	-0.570977	3373	17	GSK3B APC CSNK1A1 CTNNB1 SKP1 LRP6 GSK3A SSPO CUL1 CSNK1D AXIN2 DVL1 DVL3 CSNK1E AXIN1 FZD5 DVL2	c2.cp
PID_ER_NONGENOMIC_PATHWAY	0.908433	1	0.249818	0.704585	6527	41	NOS3 HBEGF MMP9 MSN PLCB3 PLCB2 GNA13 BCAR1 GNA15	c2.cp
PID_ATR_PATHWAY	0.992022	1	-0.184146	-0.589168	2859	39	RAD1 YWHAZ RFC3 NBN FANCD2 TOPBP1 FBXW11 RAD17 YWHAB ATR PPP2CA PPP2R2B BRCA2 CLSPN	c2.cp
PID_MET_PATHWAY	0.626294	1	0.293194	0.917234	4901	80	EGR1 SNAI1 JUN EIF4EBP1 PXN ETS1 INPP5D CDH1 CTNNA1 BCAR1 GAB2 INPPL1 MUC20 F2RL2 PLCG1 GAB1	c2.cp
PID_LPA4_PATHWAY	0.641678	1	-0.341043	-0.87025	2293	15	ADCY1 GNAL CREB1 PRKCE	c2.cp
PID_AR_PATHWAY	0.996398	1	0.183341	0.550141	7468	60	TGIF1 GSN CDKN2A TMPRSS2 TGFB1I1 HIP1 LATS2 FKBP4 PRDX1 CMTM2 KDM3A CDK11B BRCA1 CTDSP1 SNURF PIAS4 NKX3-1 SRF CARM1 HNRNPA1 PELP1 NCOA6 CCND3 PIAS3 FHL2 ZNF318 KDM1A	c2.cp
PID_EPHB_FWD_PATHWAY	0.941638	1	0.237132	0.6651	6727	40	TF PXN RRAS GRB7 EFNB1 MAP4K4	c2.cp
PID_MYC_ACTIV_PATHWAY	0.579923	1	0.303506	0.944497	4505	77	FOSL1 SNAI1 MYC PIM1 TK1 MMP9 HSPD1 SHMT1 MYCT1 ACTL6A SLC2A1 TFRC RPL11 EIF4A1 HSP90AA1 KAT5 RCC1 PTMA MTA1 BAX ID2 RUVBL2 KAT2A CDK4 NME2 LDHA	c2.cp
PID_RHOA_REG_PATHWAY	0.709824	1	0.298633	0.85518	5158	45	DEF6 MYO9B VAV1 ARHGEF1 ARHGDIB ARHGEF10 ARAP1 ARHGAP8 PLEKHG6 ARHGAP4 ARHGEF15 SRGAP1 ARHGAP9	c2.cp
PID_PS1_PATHWAY	0.588591	1	0.323827	0.930441	4281	46	FOS JUN MYC DKK1 DLL1 NOTCH1 HDAC1 NKD1 PSEN1	c2.cp
PID_NECTIN_PATHWAY	0.448866	1	0.391491	1.01698	3067	26	ITGB3 F11R TLN1 CDH1 IQGAP1 CTNNA1 PDGFRB	c2.cp
PID_WNT_SIGNALING_PATHWAY	0.729918	1	-0.284542	-0.838059	2307	27	RSPO1 WIF1 WNT1 WNT7B ATP6AP2 FZD7 WNT7A ROR2 FZD6	c2.cp
PID_TRAIL_PATHWAY	0.884151	1	0.267828	0.70622	6074	28	TNFRSF10C TNFRSF10A TNFRSF10B TNFRSF10D CFLAR RIPK1 TRADD CASP10 IKBKB PIK3R3	c2.cp
PID_CDC42_PATHWAY	1	1	-0.154593	-0.554285	2326	70	MYL2 ACTR2 ATF2 DIAPH3 WASL GSK3B IQGAP3 MAP3K1 PIK3CA MAPK1 ARPC5 TIAM1 PRKCE MAP2K4 RPS6KB1 MAPK9 BRAF APC ACTR3 RASGRF1 PIK3R1 DLG1 MAPK14	c2.cp
PID_RET_PATHWAY	0.965304	1	0.225106	0.629077	6871	39	JUN GDNF PXN GRB7 DOK1 PDLIM7 BCAR1	c2.cp
PID_CDC42_REG_PATHWAY	0.801797	1	0.291179	0.776455	5533	30	DOCK6 SPATA13 ARHGAP17 DOCK10 DNMBP PLCG1 FARP2 BCAR3 ARHGDIA MCF2L	c2.cp
PID_ATM_PATHWAY	0.992412	1	0.193308	0.523525	6931	33	UIMC1 H2AFX CDC25C CHEK2 TRIM28 KAT5 ABL1 BRCA1 RBBP8 SMC3 RFWD2 BID	c2.cp
PID_ARF6_PATHWAY	0.67576	1	0.316057	0.865527	4755	35	ITGB3 EFNA1 KIF13B ACAP1 PXN EPHA2	c2.cp
PID_WNT_CANONICAL_PATHWAY	0.935587	1	-0.237776	-0.644973	3209	19	GSK3B PIP5K1B NKD2 APC CTNNB1 PI4K2A PPP2R5A KLHL12 LRP6 CUL3 CSNK1G1	c2.cp
PID_TCPTP_PATHWAY	0.787462	1	0.282245	0.799379	5664	42	STAT5A CSF1 VEGFA CSF1R STAT3 PDGFRB GAB1 INSR STAT6 ITGB1 JAK3 KDR PIK3R3 HGF PDGFB ITGA1 PTPN1 SHC1 KPNA2 PTPN2 PIK3CD PIK3R2 EIF2A SRC	c2.cp
PID_FAS_PATHWAY	0.980181	1	-0.197306	-0.62701	2818	38	FASLG	c2.cp
PID_CIRCADIAN_PATHWAY	0.711541	1	0.352608	0.826397	4629	16	PER1 NR1D1 BHLHE40 CSNK1E TIMELESS NONO	c2.cp
PID_SHP2_PATHWAY	0.999865	1	0.149463	0.440982	7417	54	NOS3 IL6 VEGFA IL6R LCK BDNF GAB2 NGF IL2RG PDGFRB GAB1	c2.cp
PID_TELOMERASE_PATHWAY	0.549223	1	0.313849	0.954395	4172	65	FOS JUN MYC TGFB1 IRF1 MXD1 SAP30	c2.cp
PID_NETRIN_PATHWAY	0.997705	1	-0.160523	-0.491872	3042	32	DCC WASL MAP1B PIK3CA MAPK1 PIK3R1 MAP2K1 PAK1 PITPNA ELMO1 NTN1 DAPK1	c2.cp
PID_CONE_PATHWAY	0.972289	1	-0.21066	-0.590227	3227	22	GUCA1A RPE65 PDE6H PDE6C GRK1 GNB5 SLC24A2 CNGA3	c2.cp
PID_ERB_GENOMIC_PATHWAY	0.585965	1	0.397792	0.916535	3765	15	NR0B2 C3 NR0B1 NEDD8	c2.cp
PID_IGF1_PATHWAY	0.926712	1	-0.233793	-0.70026	2882	29	IGF1 YWHAZ PIK3CA PDPK1 RPS6KB1 PTPN11 SOS1	c2.cp
PID_ERBB1_RECEPTOR_PROXIMAL_PATHWAY	1	1	0.151397	0.414602	7037	35	PTPN6 GSN TLN1 STAT3 PLCG1 GAB1 PIK3R3 PTPN1 SHC1 NCK2 MAPK3 PIK3CD PIP5K1C PIK3R2 HRAS SRC	c2.cp
PID_PLK1_PATHWAY	0.885033	1	-0.23386	-0.76134	2447	43	ECT2 PPP1CB ROCK2 BORA BUB1 KIF2A PPP1R12A CENPE FBXW11 CDK1 NINL RAB1A PPP2CA CLSPN TPX2 PAK1	c2.cp
PID_FOXO_PATHWAY	0.732677	1	0.290691	0.845432	5360	49	SFN SGK1 GADD45A CDK2	c2.cp
PID_THROMBIN_PAR4_PATHWAY	0.859188	1	0.30533	0.703499	5521	15	F2RL3 PLCB2 GNA13 GNA15 F2RL2	c2.cp
PID_MYC_PATHWAY	0.525804	1	0.375135	0.965628	3565	25	MYC CDKN2A ACTL6A ZBTB17 PML KAT5 AXIN1 HBP1 RUVBL2 KAT2A TAF10 PAK2 TAF12	c2.cp
PID_IL2_PI3K_PATHWAY	0.977953	1	0.21452	0.580971	6830	33	MYC RELA LCK GAB2 NFKB1 IL2RG RPS6 HSP90AA1 IL2RA	c2.cp
PID_CERAMIDE_PATHWAY	0.944803	1	0.232709	0.674228	6880	48	MYC NFKBIA TNF RELA TNFRSF1A BIRC3 MAP4K4 NFKB1 RIPK1 TRADD PDGFA CTSD BAX	c2.cp
PID_AR_TF_PATHWAY	0.562551	1	0.32334	0.943912	4136	50	EGR1 JUN TMPRSS2 REL CEBPA HOXB13 PKN1 HDAC1 GATA2 PDE9A FOXO1 HDAC7 HSP90AA1 NR0B1 DNAJA1 KAT5 SMARCC1	c2.cp
PID_P75_NTR_PATHWAY	0.455251	1	0.330405	1.00673	3458	66	NGFR MAG MMP7 MMP3 MYD88 RIPK2 RHOC SMPD2 BIRC3 ZNF274 RHOB CASP6 BDNF NGF PSEN1 BCL2L11 SQSTM1 CASP9	c2.cp
PID_ECADHERIN_NASCENT_AJ_PATHWAY	0.997895	1	0.173359	0.482662	7110	38	JUP WASF2 CDH1 IQGAP1 CTNNA1 ITGB7 TJP1 CSNK2B PIP5K1C CTTN AP1M1 RAPGEF1 NME1 SRC ITGAE RAC1 AKT1 RHOA CSNK2A2	c2.cp
PID_AVB3_INTEGRIN_PATHWAY	0.56706	1	0.306062	0.947426	4375	74	SPP1 COL2A1 ITGB3 COL4A5 F11R CSF1 PXN COL9A2 COL1A1 COL4A1 VEGFA CSF1R TLN1 COL9A3 COL16A1 COL6A2 BCAR1 COL4A4	c2.cp
PID_LIS1_PATHWAY	0.917918	1	-0.233966	-0.69576	2873	28	RELN LRP8 MAP1B CDK5R1 PAFAH1B1 PAFAH1B2 DCX CLIP1 CDK5R2 PLA2G7	c2.cp
PID_SYNDECAN_4_PATHWAY	0.599971	1	0.340818	0.918219	4170	32	CXCR4 THBS1 ITGA5 TNC MMP9 DNM2 SDC4 LAMA1 FGFR1 ITGB1 CCL5	c2.cp
PID_ERBB2_ERBB3_PATHWAY	0.57271	1	0.329247	0.939733	4150	44	FOS JUN ERBB3	c2.cp
PID_HIF1A_PATHWAY	0.861995	1	0.299221	0.701276	5608	16	CDKN2A EGLN3 HSP90AA1 NAA10 ARNT EGLN2 TP53 HIF1A OS9 HIF3A	c2.cp
PID_BMP_PATHWAY	0.98896	1	-0.184003	-0.596647	2776	42	AHSG NOG BMPR2 XIAP PPM1A CHRDL1 GSK3B MAPK1 ZFYVE16 SMAD9 SMAD5 BMPR1A	c2.cp
PID_ECADHERIN_KERATINOCYTE_PATHWAY	0.543905	1	0.391345	0.949607	3573	19	VASP JUP CDH1 CTNNA1 PLCG1 ZYX	c2.cp
PID_ALK1_PATHWAY	0.55898	1	0.365759	0.941493	3790	25	TGFB1 ID1 ACVRL1 TLX2 INHBA TGFB3 SMAD7 ARRB2 CSNK2B ENG	c2.cp
PID_TRKR_PATHWAY	0.992819	1	0.192739	0.580294	7465	61	NGFR RHOG EHD4 RIT1 DOCK1 STAT3 BDNF GAB2 NGF PLCG1 GAB1 SQSTM1 ABL1 DYNLT1 RGS19	c2.cp
PID_NEPHRIN_NEPH1_PATHWAY	0.997682	1	0.175056	0.466803	6885	30	JUN F2RL2 PLCG1 ARRB2 TJP1 PIK3R3 NCK2 PIK3CD KIRREL PIK3R2 RAC1 PARD6A AKT1 FYN PRKCZ BAD NPHS1 NCK1 GRB2 MAPK8 MAPK10 PIK3R1 MAPK9 TRPC6 MAP2K4 CD2AP PIK3CB PIK3CA WASL PRKCI	c2.cp
PID_HIV_NEF_PATHWAY	0.706593	1	0.309283	0.846975	4972	35	NFKBIA TNF RELA TNFRSF1A BIRC3 TRAF1 CFLAR CASP6 FAS NFKB1 RIPK1 CASP7 TRADD CASP2 CASP9 MAP3K14 DAXX DFFB CD247 BID	c2.cp
PID_ERBB_NETWORK_PATHWAY	0.584565	1	0.398283	0.917668	3756	15	AREG ERBB3 HBEGF TGFA	c2.cp
PID_RHODOPSIN_PATHWAY	0.913253	1	-0.243485	-0.682196	3031	22	GUCA1A RPE65 PDE6A RHO SLC24A1 GRK1 CNGB1 GNB5 SAG GNB1	c2.cp
PID_RETINOIC_ACID_PATHWAY	0.990323	1	-0.182639	-0.551995	3069	30	NCOA2 RARB PRKCA MAPK1 NRIP1 EP300 CDK1 RXRG MAPK14	c2.cp
PID_HEDGEHOG_2PATHWAY	0.696555	1	0.337465	0.838904	4629	21	LRP2 HHIP IHH DHH GLI2 SMO ARRB2	c2.cp
PID_INTEGRIN5_PATHWAY	0.523489	1	0.40605	0.962932	3420	17	CYR61 PLAUR PLAU ITGB7 ITGB5 MADCAM1 SDC1	c2.cp
PID_AR_NONGENOMIC_PATHWAY	0.869659	1	0.269787	0.723842	6044	31	FOS PLCB3 PLCB2	c2.cp
PID_HEDGEHOG_GLI_PATHWAY	0.999265	1	-0.146732	-0.487864	2718	47	KIF3A CSNK1G3 GSK3B GNG2 SPOP XPO1 GNAI1 PIAS1 PTCH1 FBXW11 RAB23 CSNK1A1 GNB1	c2.cp
PID_VEGFR1_PATHWAY	0.952012	1	0.239065	0.62102	6506	26	NOS3 FLT1 VEGFA PGF PLCG1 HSP90AA1	c2.cp
PID_SMAD2_3PATHWAY	0.669743	1	-0.325062	-0.852419	2321	17	PPM1A MAP3K1 MAPK1 CTDSPL NUP153 TGFBRAP1 SMAD3 SMAD2 KPNB1 SMAD4 UBE2I CTDSP2 NUP214 MAPK3 KPNA2 PIAS4 CTDSP1	c2.cp
PID_ECADHERIN_STABILIZATION_PATHWAY	0.813716	1	0.279011	0.782563	5813	40	AQP3 EFNA1 VASP EPHA2 CDH1 STX4 CTNNA1 PLEKHA7 LIMA1 ZYX	c2.cp
PID_IL2_STAT5_PATHWAY	0.715426	1	-0.285572	-0.849224	2239	28	FASLG IL2RB PRF1	c2.cp
PID_THROMBIN_PAR1_PATHWAY	0.978871	1	0.211626	0.599368	7041	42	NOS3 VASP DNM2 PLCB3 ARHGEF1 PLCB2 GNA13 PKN1 GNA15 F2RL2 ZYX GNA12	c2.cp
PID_SYNDECAN_2_PATHWAY	0.870327	1	0.27084	0.722218	6006	30	ITGA5 TGFB1 ITGA2 EZR LAMA1 ITGB1 BAX	c2.cp
PID_AURORA_A_PATHWAY	0.811359	1	0.288937	0.770476	5599	30	NFKBIA GADD45A CENPA AURKA BRCA1 TACC3 OAZ1 TP53 FZR1 AURKAIP1	c2.cp
PID_ARF_3PATHWAY	0.828184	1	0.305005	0.740101	5441	19	PLD2 CD4 CLTB CLTA ARFIP2 GOSR2 ARFGAP1 AP2A1 CYTH2 RAC1 ARF1 GGA3 COPA PIP5K1A	c2.cp
PID_SYNDECAN_3_PATHWAY	0.984835	1	-0.201085	-0.520078	3441	16	NCAN POMC APH1B SDC3 CASK PTN AGRP	c2.cp
PID_IL8_CXCR1_PATHWAY	0.478127	1	0.383277	0.99564	3267	26	PIK3R6 HCK PLD1 FGR LYN PLCB3 PLCB2 GNA15 PIK3CG ARRB2	c2.cp
PID_BARD1_PATHWAY	1	1	-0.128885	-0.383273	3130	28	FANCF NBN FANCD2 RAD50 TOPBP1 PRKDC ATR UBE2D3	c2.cp
PID_P53_REGULATION_PATHWAY	0.935877	1	0.234452	0.697845	6990	57	CDK2 CDKN2A PPP1R13L RASSF1 TP53AIP1 E4F1 CHEK2 RPL11 RPL23 HIPK2 TRIM28 KAT8 KAT5 ABL1 NEDD8 RPL5 PPM1D CSNK1E DAXX RFWD2	c2.cp
PID_NCADHERIN_PATHWAY	0.997017	1	-0.175761	-0.542158	3007	33	MYL2 GRIA2 CDH2 PIK3CA CNR1 PTPN11 DAGLA GAP43 PIK3R1 CTNNB1 DCTN1	c2.cp
PID_RAS_PATHWAY	0.726129	1	-0.278915	-0.842973	2250	30	RASGRP1 RASA1 KRAS PRKCA NF1 NRAS RASA4 PRKCB PRKCE RASA2 RASGRF2 SOS1	c2.cp
PID_PI3K_PLC_TRK_PATHWAY	0.635042	1	0.323171	0.89084	4497	36	SFN EGR1 STAT5A	c2.cp
PID_EPHA2_FWD_PATHWAY	0.870644	1	0.289434	0.702318	5720	19	EFNA1 EPHA2 BCAR1 INPPL1	c2.cp
PID_LYMPH_ANGIOGENESIS_PATHWAY	0.945717	1	0.246159	0.627829	6358	24	ITGA5 RPS6KA1 COL1A1 ITGA2	c2.cp
PID_RAC1_PATHWAY	0.529047	1	0.327004	0.964804	3924	54	JUN NCF2 CYBA STAT5A NCF1 MAP2K3 ARPC1B WASF2 CDH1 PLCB2 IQGAP1 STAT3 CTNNA1 CYBB BCAR1	c2.cp
PID_FAK_PATHWAY	0.787166	1	0.273902	0.817851	5887	58	JUN ACTA1 ITGA5 PXN ETS1 MMP14 RRAS GRB7 TLN1 DOCK1 BCAR1 ITGB5 PLCG1	c2.cp
PID_TGFBR_PATHWAY	0.993549	1	0.191251	0.566179	7392	55	PPP1R15A TGFB1 TGFB3 BAMBI PML SMAD7 ARRB2 AXIN1 DYNLRB1 CTGF	c2.cp
REACTOME_RNA_POL_III_TRANSCRIPTION_INITIATION_FROM_TYPE_2_PROMOTER	0.953544	1	-0.220095	-0.623494	3160	23	GTF3C4 POLR3A TBP LZTS1 POLR3B POLR3D GTF3C3 POLR3F POLR3E POLR2K POLR2E POLR1D POLR3K POLR3C BRF1 GTF3C2 POLR1C POLR3H POLR3GL POLR2F POLR2L GTF3C5 POLR2H	c2.cp
REACTOME_INHIBITION_OF_THE_PROTEOLYTIC_ACTIVITY_OF_APC_C_REQUIRED_FOR_THE_ONSET_OF_ANAPHASE_BY_MITOTIC_SPINDLE_CHECKPOINT_COMPONENTS	0.817405	1	0.311319	0.747562	5353	18	UBE2C CDC20 CDC26	c2.cp
REACTOME_PYRUVATE_METABOLISM_AND_CITRIC_ACID_TCA_CYCLE	0.905093	1	0.251558	0.709492	6503	41	SLC16A3 PDK4 SUCLA2P1	c2.cp
REACTOME_PTM_GAMMA_CARBOXYLATION_HYPUSINE_FORMATION_AND_ARYLSULFATASE_ACTIVATION	0.983832	1	-0.193307	-0.553523	3224	24	EIF5A2 F7 STS ARSK ARSG PROS1 F10 ARSE ARSJ ARSB FURIN SUMF2 SUMF1 DHPS GGCX PROC EIF5A ARSI F2 ARSA VKORC1 PROZ ARSF DOHH	c2.cp
REACTOME_APOPTOTIC_CLEAVAGE_OF_CELLULAR_PROTEINS	0.70575	1	0.306708	0.849593	5019	37	LMNA TJP2 GSN DSP PKP1 CDH1 CASP6 CASP7 ACIN1 FNTA TJP1 PLEC BCAP31 LMNB1 PRKCQ ROCK1 DSG3	c2.cp
REACTOME_RNA_POL_I_TRANSCRIPTION_TERMINATION	0.994337	1	-0.17612	-0.488367	3335	21	GTF2H3 GTF2H1 TAF1A GTF2H4 POLR1A TAF1B POLR1B POLR2K ERCC2 UBTF GTF2H2 POLR1D CDK7 MNAT1 ERCC3 POLR1C CCNH TAF1C GTF2H2B POLR2H PTRF	c2.cp
REACTOME_BASE_EXCISION_REPAIR	0.917516	1	0.266284	0.646144	6028	19	POLD1 LIG1 MUTYH POLD2 NTHL1 POLD4 MPG FEN1 POLB OGG1 PCNA XRCC1	c2.cp
REACTOME_BILE_ACID_AND_BILE_SALT_METABOLISM	0.70695	1	0.321834	0.836031	4831	26	SLCO1B1 CH25H CYP27A1 SLC10A2 HSD3B7 SLCO1A2 ABCC3	c2.cp
REACTOME_SYNTHESIS_OF_BILE_ACIDS_AND_BILE_SALTS_VIA_7ALPHA_HYDROXYCHOLESTEROL	0.441958	1	-0.394744	-1.00728	1579	15	ABCB11 AKR1C4 CYP8B1 AKR1D1	c2.cp
REACTOME_SIGNALING_BY_RHO_GTPASES	0.458888	1	0.30959	1.00662	3755	111	RAC2 RHOG RHOH RHOD FGD2 ARHGAP30 PLEKHG2 MYO9B PREX1 RHOC VAV1 ARHGAP11B ARHGAP25 ARHGAP17 ARHGDIB DEPDC7 ARAP1 RHOB ARHGAP15 STARD8 ARHGAP8 ARHGAP31 RHOF ARHGAP19 GMIP ARHGAP22 ARHGAP4 ARHGEF16 SRGAP1	c2.cp
REACTOME_SIGNALING_BY_WNT	0.969235	1	0.216512	0.653414	7308	62	PSMB9 PSMB8 RPS27A FRAT2 PSMB10 PSME1 PSMC4 AXIN1 PPP2R1B PSMD13 PSMB1 UBA52 FRAT1 PSME2 PSMD9 PSMC5 PSMB5 PSMB4 PSMD6 PSMB6 PSMC3 PSME4 PSMD4 PSMB3 PSMB7 PSMF1 PSMA2 PSMD8 PSMD3	c2.cp
REACTOME_METABOLISM_OF_NON_CODING_RNA	0.987505	1	-0.191059	-0.635242	2686	47	SMN2 NUPL2 SEH1L PHAX NUP50 NCBP2 GEMIN5 NUP93 NUP155 WDR77 NUP133 NUP37 NCBP1 NUP153 GEMIN7 NUP54 PRMT5 SNRPE NUP43 NUP210 SNRPD1 NUP35 POM121 GEMIN6 GEMIN2 TGS1 SMN1 RAE1 GEMIN4 TPR SNRPD3 SNUPN CLNS1A NUP214 RANBP2 AAAS NUP205 NUP62 NUP107 SNRPF NUP88 SNRPD2 NUP85 DDX20 SNRPB NUP188 SNRPG	c2.cp
REACTOME_SYNTHESIS_OF_BILE_ACIDS_AND_BILE_SALTS	0.815797	1	-0.280974	-0.762149	2798	19	ABCB11 AKR1C4	c2.cp
REACTOME_METABOLISM_OF_STEROID_HORMONES_AND_VITAMINS_A_AND_D	0.672269	1	0.3257	0.868508	4639	30	LHB CYP19A1 LRP2 HSD17B3 CYP21A2 CYP11A1	c2.cp
REACTOME_SIGNALLING_BY_NGF	0.958597	1	0.217545	0.752307	8473	209	NR4A1 NGFR CDKN1A MAG NFKBIA PCSK6 FGD2 RPS6KA1 MAPKAPK2 PLEKHG2 ITPR3 MYD88 PREX1 RIPK2 VAV1 DNM2 RELA SMPD2 PCSK5 RIT1 MAPK13 RALGDS ARHGEF1 STAT3 DUSP6 FOXO4 HDAC1 RPS27A NGF PSEN1 RPS6KB2 ARHGAP4 FOXO1 PHLPP1 AATF PLCG1 ARHGEF16 BCL2L11 SQSTM1 MAPK7 CASP2 CASP9 PPP2R1B	c2.cp
REACTOME_CTNNB1_PHOSPHORYLATION_CASCADE	0.843357	1	-0.28201	-0.719613	3014	15	PPP2R5E PPP2R5C PPP2CB APC CSNK1A1 PPP2CA CTNNB1	c2.cp
REACTOME_INSULIN_RECEPTOR_RECYCLING	0.658793	1	0.349089	0.867799	4378	21	TCIRG1 ATP6V0A4 ATP6V0E1 INSR ATP6V0D2 ATP6V0B ATP6V0C ATP6V1F ATP6V1C2	c2.cp
REACTOME_DEVELOPMENTAL_BIOLOGY	0.54855	1	0.271823	0.980376	5202	376	FOXA3 MAFA EGR2 FABP4 ANGPTL4 COL2A1 ITGB3 TYROBP ONECUT1 NEUROG3 RAC2 RHOG ITGA5 TREM2 TGFB1 MYOD1 COL4A5 CEBPD HES1 CEBPB KLF4 PLXNB3 PCSK6 TRPC4 SREBF1 PCK1 NRTN RPS6KA1 GDNF PLXNB1 VASP TNF CNTN2 PTPRC COL9A2 SLC2A4 COL1A1 CD72 RND1 MSN COL4A1 SCN4A RHOC DNM2 RELA MYF6 FES RRAS UNC5B SEMA4D ITGA2 EZR TLN1 COL4A2 COL9A3 PPARG SEMA6A SIAH2 MED26 LIMK2 DOCK1	c2.cp
REACTOME_TCA_CYCLE_AND_RESPIRATORY_ELECTRON_TRANSPORT	0.666626	1	0.277186	0.905963	5486	117	SLC16A3 UCP1 UCP2 PDK4 SUCLA2P1 ATP5I NDUFB7 NDUFA3 UCP3 BSG COX6B1 PDK1 NDUFA12 NDUFB10 SLC16A8 ATP5D COX4I1 ATP5E NDUFA13 NDUFA1 NDUFS5 UQCR11 NDUFA11 NDUFB4 UQCRQ ATP5J COX6A1 ATP5J2 NDUFS7 IDH1 COX5A UQCRB NDUFB8 ATP5O UQCRH NDUFV2 NDUFB1 COX7C LDHA ATP5H NDUFB3 ETFB PDK3 ACO2 NDUFS8 NDUFB9 NDUFB2 COX7B NDUFS4 COX5B NDUFA6 SDHB NDUFS6 NDUFC1 IDH3G	c2.cp
REACTOME_BMAL1_CLOCK_NPAS2_ACTIVATES_CIRCADIAN_EXPRESSION	0.643836	1	0.325092	0.885469	4511	34	SERPINE1 PER1 BHLHE41 NR1D1 BHLHE40 NAMPT	c2.cp
REACTOME_CELL_CELL_COMMUNICATION	0.689609	1	0.274027	0.890105	5640	110	PTPN6 TYROBP CLDN11 CLDN19 LIMS3 CLDN5 CLDN2 ITGB4 F11R FLNC VASP CLDN6 JUP LIMS1 CDH1 CDH5 MAPK13 PARD3 IQGAP1 FBLIM1 CTNNA1 CLDN7	c2.cp
REACTOME_ABCA_TRANSPORTERS_IN_LIPID_HOMEOSTASIS	0.979521	1	-0.211862	-0.555571	3395	17	ABCD2 ABCG8 PEX3 ABCG4 ABCD3 ABCA10 ABCG5 PEX19	c2.cp
REACTOME_NEGATIVE_REGULATION_OF_FGFR_SIGNALING	0.782899	1	-0.262533	-0.815001	2343	34	FGF6 FGF23 KL FGF9	c2.cp
REACTOME_G0_AND_EARLY_G1	0.692148	1	0.332332	0.847613	4653	24	RBBP4P1 CDK2 CCNE2 HDAC1	c2.cp
REACTOME_REGULATION_OF_KIT_SIGNALING	0.488858	1	0.421708	0.988346	3180	16	PTPN6 SOCS1 LYN LCK SH2B3 SH2B2	c2.cp
REACTOME_MEMBRANE_TRAFFICKING	0.999032	1	0.177385	0.582269	8255	122	GJA3 GJB1 GJB3 GJB7 VAMP8 GJC2 CTSZ DNM2 FTL FTH1 VPS37B GJA4 STX4 HIP1R TFRC GJB5 SNAP23 RPS27A BLOC1S1 GJC1 SEC13 CHMP2A CLTCL1 SEC24D GAK TPD52L1 COPE CHMP4A PICALM HGS TJP1 UBA52	c2.cp
REACTOME_ACTIVATED_AMPK_STIMULATES_FATTY_ACID_OXIDATION_IN_MUSCLE	0.852549	1	-0.274207	-0.730719	2942	18	PRKAA2 PRKAA1 CAB39L PRKAG2 CAB39	c2.cp
REACTOME_BOTULINUM_NEUROTOXICITY	0.548855	1	0.393662	0.945291	3594	18	STX11 STX4 STX8 STX10	c2.cp
REACTOME_METABOLISM_OF_VITAMINS_AND_COFACTORS	0.759441	1	-0.251785	-0.845858	2010	50	RFK SLC23A1 PANK3 SLC25A32 SLC25A16 NMNAT2 AASDHPPT PNPO MOCOS MOCS3 TPK1 SLC46A1 SLC23A2 NMNAT1 GPHN MOCS2	c2.cp
REACTOME_TRANS_GOLGI_NETWORK_VESICLE_BUDDING	0.982865	1	0.205869	0.612768	7341	57	VAMP8 CTSZ DNM2 FTL FTH1 STX4 HIP1R TFRC SNAP23 BLOC1S1	c2.cp
REACTOME_PROTEOLYTIC_CLEAVAGE_OF_SNARE_COMPLEX_PROTEINS	0.496542	1	0.419003	0.982005	3230	16	STX11 STX4 STX8 STX10	c2.cp
REACTOME_RESOLUTION_OF_AP_SITES_VIA_THE_MULTIPLE_NUCLEOTIDE_PATCH_REPLACEMENT_PATHWAY	0.768936	1	0.329972	0.782516	5024	17	POLD1 LIG1 MUTYH POLD2 NTHL1 POLD4 MPG FEN1 POLB OGG1 PCNA	c2.cp
REACTOME_SIGNALING_BY_ERBB4	0.876114	1	0.245984	0.77285	6880	83	NR4A1 CDKN1A PRL GFAP ERBB3 HBEGF STAT5A	c2.cp
REACTOME_ORC1_REMOVAL_FROM_CHROMATIN	0.476046	1	0.326998	0.994381	3616	65	CDKN1A CDK2 MCM5 PSMB9 PSMB8 RPS27A MCM7 PSMB10 PSME1 PSMC4 PSMD13 PSMB1 UBA52 PSME2 PSMD9 PSMC5 PSMB5 PSMB4 PSMD6 PSMB6 CDC6 PSMC3 MCM8 PSME4 PSMD4 PSMB3 PSMB7 PSMF1 MCM6 PSMA2 PSMD8 PSMD3 MCM3 CCNA1 PSMA7	c2.cp
REACTOME_O_LINKED_GLYCOSYLATION_OF_MUCINS	0.998912	1	0.165411	0.482876	7345	50	GALNT6 MUC17 B3GNT5 ST6GALNAC3 MUC16 MUC4 B3GNT9	c2.cp
REACTOME_SULFUR_AMINO_ACID_METABOLISM	0.851434	1	-0.25879	-0.741032	2790	24	MAT1A GCLM BHMT MAT2B ENOPH1 MTAP MTR APIP SUOX CBS	c2.cp
REACTOME_ANTIVIRAL_MECHANISM_BY_IFN_STIMULATED_GENES	1	1	-0.116397	-0.411278	2441	64	KPNA5 KPNA3 EIF4E EIF4E3 KPNA4 NUPL2 UBE2N EIF4G3 EIF2AK2 STAT1 SEH1L EIF4G2 NUP50 EIF4E2 NUP93 EIF4A2 NUP155 NUP133 KPNA1 NUP37	c2.cp
REACTOME_SIGNALING_BY_ERBB2	0.999003	1	-0.164907	-0.620815	2004	95	NRG4 BTC ERBB4 CAMK4 CUL5 PRKAR2B PRKACB RICTOR PRKAR1A ADCY1 KRAS PRKCA PTEN PIK3CA NRAS MAPK1 CREB1 PDPK1 AKT3 PRKCE PDE1B CALM1 SOS1 PDE1A USP8	c2.cp
REACTOME_SPHINGOLIPID_DE_NOVO_BIOSYNTHESIS	0.994006	1	0.188174	0.491891	6798	27	SPHK1 CERS2 CERS4 ACER2 SPTLC2 CERS3 CERS5 SGPL1 SGMS2	c2.cp
REACTOME_TERMINATION_OF_O_GLYCAN_BIOSYNTHESIS	0.825124	1	-0.278212	-0.754657	2830	19	MUC6 MUC21 MUCL1	c2.cp
REACTOME_SIGNALING_BY_CONSTITUTIVELY_ACTIVE_EGFR	0.977502	1	-0.213786	-0.560617	3388	17	KRAS PIK3CA NRAS SOS1 PIK3R1 EGF GRB2 CBL EGFR HRAS SHC1 UBA52 GAB1 HSP90AA1 PLCG1 CDC37 RPS27A	c2.cp
REACTOME_SIGNALING_BY_EGFR_IN_CANCER	1	1	-0.154648	-0.587088	1918	103	CAMK4 PRKAR2B PRKACB RICTOR PRKAR1A ADCY1 KRAS EPS15 PRKCA PTEN PIK3CA NRAS ADAM10 MAPK1 ADAM12 CREB1 PDPK1 AKT3 PRKCE STAM STAM2 CLTC PDE1B CALM1 SOS1 PDE1A	c2.cp
REACTOME_PI3K_EVENTS_IN_ERBB4_SIGNALING	0.851475	1	0.271788	0.7492	6030	36	NR4A1 CDKN1A HBEGF FOXO4 RPS6KB2 FOXO1 PHLPP1 NRG2 CASP9	c2.cp
REACTOME_PI3K_EVENTS_IN_ERBB2_SIGNALING	0.714623	1	0.298982	0.846781	5140	42	NR4A1 CDKN1A ERBB3 HBEGF FOXO4 RPS6KB2 FOXO1 PHLPP1 GAB1 NRG2 CASP9	c2.cp
REACTOME_NUCLEAR_SIGNALING_BY_ERBB4	0.602204	1	-0.293664	-0.911643	1802	34	PRLR NRG4 CXCL12 BTC ERBB4	c2.cp
REACTOME_GLYCOSPHINGOLIPID_METABOLISM	0.657315	1	-0.285078	-0.884989	1967	34	GBA3	c2.cp
REACTOME_PPARA_ACTIVATES_GENE_EXPRESSION	0.943852	1	0.225502	0.725044	7614	102	ANGPTL4 PLIN2 G0S2 TEAD4 SREBF1 APOA5 TEAD3 ACSL1 FADS1 AGT PPARG NR1D1 MED26	c2.cp
REACTOME_PRE_NOTCH_TRANSCRIPTION_AND_TRANSLATION	0.880514	1	0.278382	0.702664	5887	23	JUN NOTCH4 MOV10 NOTCH3 SNW1 MAML2 KAT2A MAML1 TP53	c2.cp
REACTOME_MITOCHONDRIAL_PROTEIN_IMPORT	0.99643	1	0.179918	0.521275	7256	48	HSPD1 TAZ TOMM7 COX17 TIMM8B TOMM5 LDHD TIMM44 SLC25A13 GFER ACO2 TIMM9 PMPCA TIMM10 GRPEL1 IDH3G HSPA9 BCS1L ATP5G1 HSCB CYC1 TIMM13 MTX2	c2.cp
REACTOME_SIGNALING_BY_HIPPO	0.998637	1	0.15795	0.388124	6591	20	TJP2 LATS2 DVL2 TJP1 AMOTL2	c2.cp
REACTOME_ACTIVATED_NOTCH1_TRANSMITS_SIGNAL_TO_THE_NUCLEUS	0.761575	1	0.31132	0.801362	5164	25	DLL4 DLK1 DLL1 DTX2 RPS27A PSEN1 JAG1 ARRB2 MIB2 UBA52	c2.cp
REACTOME_DOWNSTREAM_SIGNALING_EVENTS_OF_B_CELL_RECEPTOR_BCR	0.607969	1	0.292478	0.92938	4836	92	NR4A1 CDKN1A NFKBIA PSMB9 RASGRP3 RELA NFKBIE REL PSMB8 NFKBIB FOXO4 RPS27A RPS6KB2 FOXO1 PHLPP1 PSMB10 PSME1 PSMC4 CASP9 MALT1 PSMD13 BCL10 PSMB1 IKBKB UBA52 PSME2 PSMD9 PSMC5 PSMB5 PSMB4 PSMD6 PSMB6 PSMC3 TSC2 PSME4 PSMD4 PSMB3 PSMB7 AKT2 PSMF1	c2.cp
REACTOME_RORA_ACTIVATES_CIRCADIAN_EXPRESSION	0.728205	1	-0.291711	-0.826367	2413	23	NCOA2 RORA TBL1XR1 CLOCK	c2.cp
REACTOME_PRE_NOTCH_EXPRESSION_AND_PROCESSING	0.986528	1	0.204672	0.569841	7029	38	JUN B4GALT1 NOTCH4 MOV10 MFNG NOTCH3 SNW1 MAML2 KAT2A ATP2A1 RFNG MAML1	c2.cp
REACTOME_SIGNALING_BY_THE_B_CELL_RECEPTOR_BCR	0.458919	1	0.307481	1.00783	3786	121	NR4A1 CDKN1A NFKBIA BTK PSMB9 SYK ITPR3 PIK3AP1 RASGRP3 ORAI1 LYN VAV1 RELA NFKBIE REL PSMB8 NFKBIB FOXO4 RPS27A RPS6KB2 FOXO1 PHLPP1 PLCG1 PSMB10 PSME1 PSMC4 CASP9 CD79B MALT1 PSMD13 CBLB BCL10 PSMB1 IKBKB UBA52 PSME2 PSMD9 PSMC5 PSMB5 PSMB4 PSMD6 PSMB6 PLCG2 PSMC3 TSC2 PSME4 CD79A SHC1	c2.cp
REACTOME_NOTCH1_INTRACELLULAR_DOMAIN_REGULATES_TRANSCRIPTION	0.783113	1	0.283039	0.807845	5675	44	MYC HES1 HEYL TLE3 HEY2 HDAC1 RPS27A HDAC7 NCOR2 HDAC10 SNW1 MAML2 UBA52 KAT2A HDAC6	c2.cp
REACTOME_CIRCADIAN_REPRESSION_OF_EXPRESSION_BY_REV_ERBA	0.809639	1	-0.27527	-0.771252	2687	22	NCOA2 RORA TBL1XR1 CLOCK	c2.cp
REACTOME_PRE_NOTCH_PROCESSING_IN_GOLGI	0.981405	1	0.217739	0.510308	6385	16	B4GALT1 NOTCH4 MFNG NOTCH3 ATP2A1 RFNG	c2.cp
REACTOME_SIGNALING_BY_NOTCH1	0.751019	1	0.276725	0.845113	5709	67	MYC DLL4 HES1 DLK1 DLL1 HEYL TLE3 HEY2 DTX2 HDAC1 RPS27A PSEN1 JAG1 HDAC7 ARRB2 NCOR2 MIB2 HDAC10 SNW1 MAML2 UBA52 KAT2A HDAC6	c2.cp
REACTOME_TRIGLYCERIDE_BIOSYNTHESIS	0.698715	1	0.309018	0.851825	4948	36	ELOVL1 ELOVL3 ACSL5 ACSL1 ELOVL5 GPAT2 SLC25A1 TECR AGPAT2	c2.cp
REACTOME_INSULIN_RECEPTOR_SIGNALLING_CASCADE	0.562987	1	-0.259366	-0.952313	1228	81	FGF6 FGF23 KL PRKAA2 FGF9 PRKAA1 PPM1A EIF4E KRAS CAB39L PIK3CA NRAS PIK3CB MAPK1 FGF7 FRS2 PDPK1 SHC3 PRKAG2 CAB39 RPS6KB1 SOS1	c2.cp
REACTOME_ARMS_MEDIATED_ACTIVATION	0.450245	1	-0.380732	-0.998404	1560	17	NTRK1 KRAS NRAS MAPK1 BRAF CDK1 YWHAB MAP2K1 CRK KIDINS220	c2.cp
REACTOME_PROLONGED_ERK_ACTIVATION_EVENTS	0.519382	1	-0.349799	-0.948838	1781	19	NTRK1 KRAS NRAS MAPK1 FRS2 BRAF CDK1 YWHAB MAP2K1	c2.cp
REACTOME_SIGNALLING_TO_RAS	1	1	-0.138024	-0.406522	3161	27	NTRK1 KRAS NRAS MAPK1 SHC3 SOS1 CDK1 MAPK14 YWHAB MAP2K1	c2.cp
REACTOME_NGF_SIGNALLING_VIA_TRKA_FROM_THE_PLASMA_MEMBRANE	1	1	-0.126727	-0.499687	1644	132	CAMK4 PRKAR2B PRKACB RICTOR PRKAR1A ADCY1 NTRK1 KRAS PRKCA MEF2C PTEN PIK3CA NRAS PIK3CB ADORA2A MAPK1 PPP2CB CREB1 FRS2 PDPK1 AKT3 SHC3 PRKCE CLTC PDE1B CALM1 SOS1 MEF2A PDE1A NTRK2 BRAF RPS6KA3 CDKN1B CDK1 RIT2 PIK3R1 MAPK14 YWHAB PPP2CA PRKAR2A ADCYAP1R1 DNAL4 MAP2K1 IRS1 DUSP3 MAPKAP1 RPS6KA5 CALM3 DUSP7 THEM4 FOXO3 CHUK CRK RALA ITPR2 RALB KIDINS220 ATF1 ADCY5 CALM2 PRKACA GRB2 MDM2 PPP2R5D	c2.cp
REACTOME_SIGNALLING_TO_ERKS	1	1	0.133932	0.369191	7082	36	MAPKAPK2 RIT1 MAPK13 RALGDS NGF PLCG1 MAPKAPK3 SHC1 SHC2 RAF1 MAPK3 MAPK11 RAPGEF1 HRAS SRC MAPK12 MAP2K2 RAP1A GRB2 KIDINS220 RALB RALA CRK MAP2K1 YWHAB MAPK14 RIT2 CDK1 BRAF SOS1 SHC3 FRS2 MAPK1 NRAS KRAS NTRK1	c2.cp
REACTOME_COLLAGEN_FORMATION	0.446691	1	0.343608	1.01379	3313	54	SERPINH1 COL2A1 ADAMTS14 COL4A5 COL9A2 COL1A1 COL4A1 PLOD3 COL4A2 COL9A3 PLOD1 COL16A1 ADAMTS2 COL27A1 COL6A2 BMP1 COL4A4 PPIB	c2.cp
REACTOME_SIGNALING_BY_FGFR_IN_DISEASE	0.988694	1	-0.188868	-0.732273	1748	118	FGF6 FGF23 KL FGF9 CAMK4 CPSF6 PRKAR2B PRKACB RICTOR PRKAR1A ADCY1 KRAS PRKCA PTEN FGFR1OP2 PIK3CA NRAS MAPK1 FGFR1OP FGF7 PPP2CB CREB1 FRS2 PDPK1 AKT3 PRKCE STAT1 PDE1B CALM1 SOS1 PDE1A BRAF FGF2 CDKN1B	c2.cp
REACTOME_HS_GAG_DEGRADATION	0.918497	1	0.264344	0.649561	6062	20	HSPG2 SDC4 NAGLU GUSB SDC1 GPC2 HPSE2 AGRN SGSH IDUA GPC5 HPSE	c2.cp
REACTOME_SIGNALLING_TO_P38_VIA_RIT_AND_RIN	0.55049	1	-0.364992	-0.931361	1967	15	NTRK1 KRAS NRAS MAPK1 BRAF CDK1 RIT2 YWHAB MAP2K1	c2.cp
REACTOME_REGULATION_OF_HYPOXIA_INDUCIBLE_FACTOR_HIF_BY_OXYGEN	0.994584	1	0.185861	0.462031	6610	21	EPO VEGFA EGLN3 RPS27A	c2.cp
REACTOME_SYNTHESIS_OF_PIPS_AT_THE_GOLGI_MEMBRANE	0.470436	1	-0.374988	-0.983342	1630	17	PIK3C2A PIKFYVE SACM1L PI4K2B PIK3C3 PI4K2A PIK3C2G ARF3 PIK3R4	c2.cp
REACTOME_ACTIVATED_POINT_MUTANTS_OF_FGFR2	0.577622	1	-0.357745	-0.912868	2064	15	FGF6 FGF23 FGF9	c2.cp
REACTOME_PHOSPHOLIPID_METABOLISM	0.999656	1	0.171595	0.587536	8728	184	PLA2G2E PLA2G2A SPHK1 PIK3R6 PIK3R5 PLA2G1B GLA SLC44A4 PLD1 CERS2 PLA2G16 SLC44A1 PIP4K2A GAL3ST1 GPAT2 SLC44A3 SMPD2 PLD2 PLA2G3 PIK3C2B PNPLA2 AGPAT2 PLD4 TPTE2 INPPL1 PTDSS2 CERS4 MBOAT1 TAZ LPCAT2 PIK3CG NEU1 PLBD1	c2.cp
REACTOME_GASTRIN_CREB_SIGNALLING_PATHWAY_VIA_PKC_AND_MAPK	0.968107	1	0.214071	0.734392	8468	188	EDN2 F2RL3 RGS2 FFAR3 KISS1R GPR4 MMP3 HBEGF P2RY2 FPR2 GNG8 GAST RPS6KA1 BDKRB1 BDKRB2 ITPR3 NMB PTGER1 SAA1 FFAR2 TACR3 QRFP UTS2R P2RY6 AGT PLCB3 GPR132 GNG5 LPAR1 GCGR OXT EDNRA GNGT2 PLCB2 XCL2 TRHR NTSR2 CYSLTR2 FFAR1 LTB4R	c2.cp
REACTOME_CHONDROITIN_SULFATE_BIOSYNTHESIS	0.933039	1	0.258114	0.62632	6130	19	CHST3 CHSY1 BGN CHST11 CHPF2 CSPG4	c2.cp
REACTOME_SIGNALING_BY_FGFR1_MUTANTS	0.737705	1	-0.278461	-0.834052	2294	29	FGF6 FGF23 FGF9 CPSF6	c2.cp
REACTOME_SYNTHESIS_OF_PIPS_AT_THE_PLASMA_MEMBRANE	0.996378	1	0.183441	0.489162	6876	30	PIK3R6 PIK3R5 PIP4K2A PIK3C2B INPPL1 PIK3CG	c2.cp
REACTOME_DOWNREGULATION_OF_SMAD2_3_SMAD4_TRANSCRIPTIONAL_ACTIVITY	0.633926	1	-0.322297	-0.874238	2174	19	UBE2D1 TRIM33 PPM1A SKIL	c2.cp
REACTOME_KERATAN_SULFATE_BIOSYNTHESIS	0.64399	1	-0.308771	-0.884149	2110	24	OGN LUM B4GALT6	c2.cp
REACTOME_SIGNALING_BY_FGFR1_FUSION_MUTANTS	0.978273	1	-0.20774	-0.553594	3376	18	CPSF6 FGFR1OP2 PIK3CA FGFR1OP STAT1 PIK3R1 ZMYM2	c2.cp
REACTOME_PI_METABOLISM	0.997427	1	-0.159145	-0.529133	2713	47	MTMR7 MTMR6 SYNJ1 PIK3C2A PIKFYVE SACM1L PTEN PI4K2B PIK3CA PIK3CB	c2.cp
REACTOME_CHONDROITIN_SULFATE_DERMATAN_SULFATE_METABOLISM	0.992171	1	0.193575	0.558706	7223	47	CHST3 HYAL1 HSPG2 CHSY1 DSE SDC4 BGN SDC1 GPC2 CHST11 GXYLT2 AGRN CHPF2 HEXB CSPG4 B3GAT3 IDUA GPC5	c2.cp
REACTOME_SYNTHESIS_OF_PC	0.702525	1	0.350549	0.831315	4590	17	SLC44A4 SLC44A1 SLC44A3 LPIN3 SLC44A2 ACHE CHKB	c2.cp
REACTOME_KERATAN_SULFATE_KERATIN_METABOLISM	0.653785	1	-0.297349	-0.884246	2046	28	OGN LUM B4GALT6	c2.cp
REACTOME_HEPARAN_SULFATE_HEPARIN_HS_GAG_METABOLISM	0.605204	1	-0.272377	-0.920513	1604	51	HS6ST2 GPC6 HS2ST1 NDST3 GLCE HS6ST3 NCAN HS3ST1 IDS HS3ST3B1 EXT1 GXYLT1	c2.cp
REACTOME_GLYCOSAMINOGLYCAN_METABOLISM	1	1	-0.152812	-0.583204	1873	106	OGN LUM B4GALT6 HS6ST2 GPC6 HS2ST1 UST NDST3 GLCE CHSY3 HS6ST3 B3GNT2 NCAN HMMR HS3ST1 IDS	c2.cp
REACTOME_SIGNALING_BY_FGFR_MUTANTS	0.901353	1	-0.230469	-0.747314	2530	42	FGF6 FGF23 FGF9 CPSF6 KRAS FGFR1OP2 PIK3CA NRAS FGFR1OP FGF7 FRS2 STAT1 SOS1 FGF2	c2.cp
REACTOME_GLYCEROPHOSPHOLIPID_BIOSYNTHESIS	0.599743	1	0.300021	0.933652	4659	77	PLA2G2E PLA2G2A PLA2G1B SLC44A4 PLD1 PLA2G16 SLC44A1 GPAT2 SLC44A3 PLD2 PLA2G3 PNPLA2 AGPAT2 PLD4 PTDSS2 MBOAT1 TAZ LPCAT2 PLBD1 LPCAT3 LPIN3 HADHB HADHA	c2.cp
REACTOME_A_TETRASACCHARIDE_LINKER_SEQUENCE_IS_REQUIRED_FOR_GAG_SYNTHESIS	0.999558	1	0.148661	0.382664	6778	25	HSPG2 SDC4 BGN SDC1 GPC2 GXYLT2 AGRN CSPG4 B3GAT3 GPC5	c2.cp
REACTOME_ENOS_ACTIVATION_AND_REGULATION	0.965911	1	0.233025	0.565439	6346	19	NOS3 DNM2 SPR HSP90AA1 DHFR NOSIP NOSTRIN GCHFR	c2.cp
REACTOME_MICRORNA_MIRNA_BIOGENESIS	0.863053	1	0.296	0.710777	5652	18	POLR2H POLR2J POLR2L POLR2F POLR2G POLR2I POLR2C	c2.cp
REACTOME_NUCLEAR_EVENTS_KINASE_AND_TRANSCRIPTION_FACTOR_ACTIVATION	0.999108	1	0.161353	0.411531	6717	24	RPS6KA1 MAPKAPK2 DUSP6 MAPK7 PPP2R1B	c2.cp
REACTOME_PI3K_AKT_ACTIVATION	0.660313	1	0.317666	0.875664	4676	36	NR4A1 CDKN1A FOXO4 NGF RPS6KB2 FOXO1 PHLPP1	c2.cp
REACTOME_REGULATORY_RNA_PATHWAYS	0.962146	1	-0.220077	-0.610259	3227	21	DICER1 TNRC6B TNRC6A POLR2K POLR2D TNRC6C POLR2A POLR2E DROSHA XPO5 TARBP2 RAN DGCR8 POLR2B POLR2C POLR2I POLR2G POLR2F POLR2L POLR2J POLR2H	c2.cp
REACTOME_EGFR_DOWNREGULATION	0.994509	1	-0.168938	-0.483743	3259	24	EPS15 STAM STAM2 CLTC EGF GRB2 AP2B1 SH3GL2 CBL CDC42 EGFR AP2M1 SH3KBP1 AP2A2 AP2A1 EPN1 CLTA SPRY2 AP2S1 UBA52 HGS EPS15L1 RPS27A SPRY1	c2.cp
REACTOME_PROCESSING_OF_CAPPED_INTRON_CONTAINING_PRE_MRNA	0.984085	1	0.206818	0.685174	8223	132	SNRPG YBX1 HNRNPF SRSF3 POLR2H NUP188 POLR2J PTBP1 SF3B4 SF3B2 CPSF1 DHX38 SNRPB POLR2L POLR2F SF3A2 SNRPA SRSF4 POLR2G PHF5A NUP85 SNRNP70 SRSF7 SNRPD2 NXF1 LSM2 NUP88 POLR2I U2AF2 U2AF1 PRPF8 HNRNPUL1 POLR2C SNRNP40 SNRPF TXNL4A NUP107 PCBP1 DDX23 HNRNPA1 NUP62 GTF2F1 MAGOH CPSF3 NUP205 HNRNPM AAAS SUGP1 PRPF6 HNRNPD GTF2F2 SMC1A HNRNPL SNRNP200 RANBP2 SNRPA1 FUS HNRNPU SF3B5 SF3B3 HNRNPH1 NUP2…	c2.cp
REACTOME_GAB1_SIGNALOSOME	0.579133	1	0.336008	0.926225	4101	36	NR4A1 CDKN1A FOXO4 RPS6KB2 FOXO1 PHLPP1 GAB1 CASP9	c2.cp
REACTOME_ERK_MAPK_TARGETS	0.99851	1	-0.16109	-0.446692	3349	21	MEF2C MAPK1 PPP2CB MEF2A RPS6KA3 MAPK14 PPP2CA DUSP3 RPS6KA5 DUSP7	c2.cp
REACTOME_TIE2_SIGNALING	0.883397	1	0.288796	0.68487	5772	17	ANGPT2 DOK2 GRB7 GRB14	c2.cp
REACTOME_GENERIC_TRANSCRIPTION_PATHWAY	1	1	0.15845	0.567301	9375	335	SERPINE1 NR4A1 JUNB NR4A2 TBX5 ZNF560 NR4A3 MYC TEAD4 NR0B2 VDR ZNF460 TGIF1 ZIM3 ZNF331 TEAD3 NR5A1 ZNF394 ZNF600 ZNF10 ZNF548 PPARG NR1D1 MED26 ZNF184 ZNF442 ESRRB ZNF274 ZNF189 NOTCH4 ZNF595 NPPA ZNF304 HDAC1 RPS27A ZNF256 SMAD7 ZNF543 NR0B1 ZNF565 SP1 TRIM28 ZNF227 ZNF160 TEAD2 NOTCH3 ZNF446 ZNF571 ZNF433 ZNF439 ZNF563 NCOR2 NR2F6 RARA CTGF MED12 RUNX2 ZNF577 SMARCD3 ZNF514 SNW1 ZNF552 MED30 …	c2.cp
REACTOME_TRANSPORT_OF_MATURE_TRANSCRIPT_TO_CYTOPLASM	0.924208	1	-0.219484	-0.741759	2450	51	EIF4E SRSF11 NUPL2 CDC40 SEH1L CPSF2 NUP50 NCBP2 NUP93 NUP155 SRSF9 NUP133 NUP37 NCBP1 NUP153 SLBP NUP54 SRSF5 NUP43 NUP210 RNPS1 SRSF6 NUP35 SRRM1 POM121 SRSF2 RBM8A NFX1 RAE1 UPF3B TPR SRSF1 NUP214 RANBP2 AAAS NUP205 CPSF3 MAGOH NUP62 NUP107 U2AF1 U2AF2 NUP88 NXF1 SRSF7 NUP85 SRSF4 DHX38 CPSF1 NUP188 SRSF3	c2.cp
REACTOME_METABOLISM_OF_AMINO_ACIDS_AND_DERIVATIVES	0.982845	1	0.206206	0.707043	8593	187	HPD HAO1 LHB SAT1 CKM CTH TSHB PSMB9 ARG2 AGXT SQRDL PHGDH AASS DIO1 BBOX1 AFMID DIO3 INHBA SHMT1 AANAT PRODH QDPR PSMB8 HAL SMOX GLUL PSAT1 TST PAOX FAH INHBE GRHPR SLC25A2 PSMB10 PSME1 PSMC4 HSD17B10 AMDHD1 MRI1 SLC6A8 CKMT2 ETHE1 IYD GPT2 PCBD1 ALDH7A1 PSMD13 TPH2 PSMB1 OTC PSME2 ARG1 PSMD9 PSMC5 MAT2A PSMB5 PSMB4 PSMD6 PSMB6 MCCC1 BCAT2 PSMC3 PSME4 NQO1 CKB TPO OAZ1 PSMD4 TMLHE FTCD GPT PSMB3…	c2.cp
REACTOME_BIOLOGICAL_OXIDATIONS	0.986054	1	0.204443	0.669485	8130	119	PTGS2 CYP19A1 TBXAS1 UGT1A6 OPLAH CYP27A1 PTGS1 CYP2S1 CYP2W1 CYP21A2 CYP4F2 GGT1 UGT2B7 SULT1A4 ADH6 CYP11A1 GGT5 CYP2J2 SMOX CYP2C9 CYP2D6 CYP4F11 ACSS2 UGDH MGST1 COMT GSTP1 SULT1A2 PAOX SULT1E1 CYP26C1 SULT1A3 GSTO1 CYP2F1 ACSM1 MGST2 CYP4F12 ACSS1 CYP4F3 SULT1C4	c2.cp
REACTOME_REGULATION_OF_ORNITHINE_DECARBOXYLASE_ODC	0.660854	1	0.306694	0.888584	4812	48	PSMB9 PSMB8 PSMB10 PSME1 PSMC4 PSMD13 PSMB1 PSME2 PSMD9 PSMC5 PSMB5 PSMB4 PSMD6 PSMB6 PSMC3 PSME4 NQO1 OAZ1 PSMD4 PSMB3 PSMB7 PSMF1 PSMA2 PSMD8 PSMD3	c2.cp
REACTOME_CYTOCHROME_P450_ARRANGED_BY_SUBSTRATE_TYPE	0.734102	1	0.29238	0.843881	5344	47	CYP19A1 TBXAS1 CYP27A1 CYP2S1 CYP2W1 CYP21A2 CYP4F2 CYP11A1 CYP2J2 CYP2C9 CYP2D6 CYP4F11	c2.cp
REACTOME_NRAGE_SIGNALS_DEATH_THROUGH_JNK	0.635434	1	0.316447	0.899888	4597	43	NGFR FGD2 PLEKHG2 PREX1 VAV1 NGF ARHGAP4 AATF ARHGEF16 BCL2L11	c2.cp
REACTOME_REGULATION_OF_APOPTOSIS	0.617118	1	0.308654	0.915991	4599	56	PSMB9 UNC5B PSMB8 DAPK2 RPS27A PSMB10 PSME1 PSMC4 CASP9 PSMD13 PSMB1 UBA52 PSME2 PSMD9 PSMC5 PSMB5 PSMB4 PSMD6 PSMB6 DAPK3 PSMC3 PSME4 UNC5A PSMD4 PSMB3 PSMB7 PSMF1 PSMA2 PAK2 PSMD8 PSMD3	c2.cp
REACTOME_RNA_POL_II_TRANSCRIPTION	0.985735	1	-0.19143	-0.720566	2003	94	GTF2A1 NUDT21 GTF2H3 TAF13 SRSF11 CCNT2 CDC40 GTF2E1 TBP GTF2H1 RNGTT CPSF2 TCEA1 GTF2H4 NCBP2 RNMT SRSF9 GTF2A2 POLR2K PAPOLA POLR2D LSM11 NCBP1 CSTF1 TAF4 SUPT16H POLR2A TAF1 TAF5 POLR2E SLBP SRSF5 TAF9 ERCC2 SNRPE TAF4B CSTF2 GTF2H2 RNPS1 CPSF7 TAF11 SRSF6 SRRM1 CCNT1 CDK7 SRSF2 CLP1 POLR2B RBM8A CSTF3 PCF11 NFX1 UPF3B MNAT1 CDK9 SUPT4H1 ZNF473 SNRPD3 SRSF1 PABPN1 ERCC3 TAF6 SSRP1 GTF2F2 TAF12…	c2.cp
REACTOME_PHASE1_FUNCTIONALIZATION_OF_COMPOUNDS	0.777116	1	0.272831	0.82717	5874	64	PTGS2 CYP19A1 TBXAS1 CYP27A1 PTGS1 CYP2S1 CYP2W1 CYP21A2 CYP4F2 ADH6 CYP11A1 CYP2J2 SMOX CYP2C9 CYP2D6 CYP4F11 ACSS2	c2.cp
REACTOME_RNA_POL_III_TRANSCRIPTION	0.946636	1	-0.220186	-0.679195	2855	33	GTF3C4 NFIB POLR3A TBP SNAPC3 LZTS1 POLR3B POLR3D GTF3C3 POLR3F POLR3E POLR2K POU2F1 POLR2E SNAPC5 SSB POLR1D SNAPC1 BRF2 POLR3K POLR3C BRF1 GTF3C2 POLR1C SNAPC2 POLR3H SNAPC4 POLR3GL ZNF143 POLR2F POLR2L GTF3C5 POLR2H	c2.cp
REACTOME_CELL_DEATH_SIGNALLING_VIA_NRAGE_NRIF_AND_NADE	0.76747	1	0.279065	0.830634	5732	57	NGFR FGD2 PLEKHG2 PREX1 VAV1 RPS27A NGF PSEN1 ARHGAP4 AATF ARHGEF16 BCL2L11 SQSTM1 CASP2	c2.cp
REACTOME_AMINO_ACID_TRANSPORT_ACROSS_THE_PLASMA_MEMBRANE	0.589394	1	0.345798	0.922103	4067	30	SLC6A19 SLC1A5 SLC7A7 SLC7A2 SLC6A14 SLC7A9 SLC7A3 SLC6A12	c2.cp
REACTOME_GLYCOLYSIS	0.982018	1	0.212992	0.556766	6716	27	PGAM2 PFKFB1 PFKFB3 PFKFB4 PFKL PPP2R1B	c2.cp
REACTOME_PROCESSIVE_SYNTHESIS_ON_THE_LAGGING_STRAND	0.555625	1	0.407306	0.938457	3570	15	POLD1 POLA1 LIG1 PRIM2 DNA2 POLD2 POLD4 POLA2 FEN1	c2.cp
REACTOME_MRNA_CAPPING	0.955963	1	-0.22015	-0.659397	2973	29	GTF2H3 GTF2H1 RNGTT GTF2H4 NCBP2 RNMT POLR2K POLR2D NCBP1 POLR2A POLR2E ERCC2 GTF2H2 CDK7 POLR2B MNAT1 ERCC3 GTF2F2 GTF2F1 POLR2C SUPT5H POLR2I POLR2G CCNH POLR2F POLR2L POLR2J GTF2H2B POLR2H	c2.cp
REACTOME_INTEGRATION_OF_ENERGY_METABOLISM	0.948144	1	-0.205594	-0.786164	1736	109	CDX2 GLP1R PRKAA2 PLCB1 ISL1 AKAP5 MARCKS GNG10 PRKAR2B SPCS3 PKLR PRKACB PRKAR1A ADCY1 PRKCA KCNS3 GNG13 GNAQ GNG2 PCSK1 PPP2CB KCNC2 VAMP2 SNAP25 PRKAG2	c2.cp
REACTOME_CELL_CYCLE_MITOTIC	0.99719	1	0.193736	0.688782	9225	301	UBE2C CDKN1A RBBP4P1 CDC45 MYC MCM10 TYMS CDK2 MCM5 PSMB9 CENPA CDKN2A CCNE2 RPA4 CDKN2C GMNN GINS4 CDC20 RPS27 POLD1 POLE PSMB8 MAPRE1 CDC25C KIF2C CCNB2 KIF20A HDAC1 RPS27A MCM7 NDC80 ALMS1 PTTG1 TUBBP2 DYNLL1 CDC26 HSP90AA1 AURKA PMF1 TUBB4B PSMB10 PSME1 SEC13 PSMC4 NUMA1 CEP192 KIF18A NUDC SSNA1 CENPJ PPP2R1B DHFR GINS2 OFD1 CENPT CCNH POLA1 LIG1 RFC2 MYBL2 PSMD13 NUP85 STAG1 MAD1L1 CSNK1E PS…	c2.cp
REACTOME_GLUCONEOGENESIS	0.813098	1	0.28829	0.768752	5611	30	PGAM2 PCK1 PFKFB1 SLC25A1	c2.cp
REACTOME_OPIOID_SIGNALLING	0.517724	1	-0.266589	-0.966393	1182	74	PLCB1 CAMK4 PPP3CA GNG10 PRKAR2B PRKACB PRKAR1A ADCY1 PRKCA PPP3CB GNAL GNG13 POMC PDYN GNG2 MAPK1 PLCB4 PPP2CB CREB1 PPP3R1 PDE1B CALM1 PDE1A GNB5 GNAI1	c2.cp
REACTOME_RECRUITMENT_OF_MITOTIC_CENTROSOME_PROTEINS_AND_COMPLEXES	0.976394	1	-0.195638	-0.688934	2398	63	PRKAR2B PLK4 CEP135 CEP41 PAFAH1B1 FGFR1OP AKAP9 TUBGCP5 CDK1 NINL TUBGCP3 CEP57 CETN2 YWHAG PCM1 DCTN1 CLASP1 PRKACA PLK1 CCNB1 YWHAE CEP63 DYNC1H1 PPP2R1A CEP70 NEK2 NEDD1 CEP290 TUBGCP6 CNTRL DCTN3 ACTR1A TUBG2 CKAP5 CSNK1D SDCCAG8 CEP250 CEP72 HAUS2 DCTN2 CEP76 TUBB4A TUBGCP2 TUBG1 TUBA1A PCNT CEP164 TUBA4A DYNC1I2 TUBB CDK5RAP2 CSNK1E OFD1 CENPJ SSNA1 CEP192 NUMA1 TUBB4B HSP90AA1 DYNLL1 TUBB…	c2.cp
REACTOME_MITOCHONDRIAL_TRNA_AMINOACYLATION	0.704322	1	-0.301943	-0.837266	2362	21	WARS2 PPA2 VARS2 NARS2 PARS2 DARS2 EARS2 TARS2 IARS2 AARS2 GARS YARS2 QARS MARS2 FARS2 RARS2 LARS2 HARS2 SARS2 KARS CARS2	c2.cp
REACTOME_CYTOSOLIC_TRNA_AMINOACYLATION	0.759915	1	-0.283909	-0.812957	2490	24	NARS IARS FARSB FARSA EEF1E1 EPRS WARS SARS DARS AIMP2 AIMP1 GARS RARS YARS QARS LARS VARS PPA1 MARS HARS AARS CARS KARS TARS	c2.cp
REACTOME_LOSS_OF_NLP_FROM_MITOTIC_CENTROSOMES	0.97606	1	-0.195581	-0.67237	2486	56	PRKAR2B PLK4 CEP135 CEP41 PAFAH1B1 FGFR1OP AKAP9 CDK1 NINL CEP57 CETN2 YWHAG PCM1 DCTN1 CLASP1 PRKACA PLK1 YWHAE CEP63 DYNC1H1 PPP2R1A CEP70 NEK2 NEDD1 CEP290 CNTRL DCTN3 ACTR1A CKAP5 CSNK1D SDCCAG8 CEP250 CEP72 HAUS2 DCTN2 CEP76 TUBB4A TUBG1 TUBA1A PCNT CEP164 TUBA4A DYNC1I2 TUBB CDK5RAP2 CSNK1E OFD1 CENPJ SSNA1 CEP192 TUBB4B HSP90AA1 DYNLL1 TUBBP2 ALMS1 MAPRE1	c2.cp
REACTOME_CELL_CYCLE_CHECKPOINTS	0.624679	1	0.283656	0.922299	5112	111	UBE2C CDKN1A CDC45 MCM10 CDK2 MCM5 PSMB9 CCNE2 CDC20 PSMB8 CDC25C CCNB2 CHEK2 RPS27A MCM7 CDC26 PSMB10 PSME1 PSMC4 RFC2 PSMD13 MAD1L1 PSMB1 UBA52 PSME2 PSMD9 PSMC5 PSMB5 PSMB4 RFWD2 PSMD6 PSMB6 CDC6 PSMC3 MCM8 PSME4 PSMD4 ANAPC2 TP53 PSMB3 PSMB7 PSMF1 MCM6 HUS1 PSMA2 PSMD8 PSMD3 ANAPC11 ATRIP	c2.cp
REACTOME_DIABETES_PATHWAYS	0.579132	1	0.289244	0.948061	4778	121	ATF3 CCL2 LMNA DDIT3 ATF4P3 KLF4 IGF2BP1 MMP1 HSPA5 IGF2BP2 HERPUD1 XBP1 TLN1 SULT1A4 ATF4 IGFALS DNAJB11 ACADVL CALR LEP WIPI1 ERN1 ZBTB17 SULT1A3 SEC11A IGFBP4 EIF2AK3 HSP90B1	c2.cp
REACTOME_PLC_BETA_MEDIATED_EVENTS	0.685334	1	-0.271645	-0.874313	1957	40	PLCB1 CAMK4 PRKAR2B PRKACB PRKAR1A ADCY1 PRKCA MAPK1 PLCB4 CREB1 PDE1B CALM1 PDE1A GNAI1	c2.cp
REACTOME_G_PROTEIN_ACTIVATION	0.877542	1	0.273936	0.711604	5997	26	GNAT2 GNG8 GNAT1 GNG5 GNGT2	c2.cp
REACTOME_ABC_FAMILY_PROTEINS_MEDIATED_TRANSPORT	0.992985	1	0.191223	0.517879	6935	33	ABCA8 ABCA2 CFTR ABCD1 ABCC3 ABCG1 ABCA6 ABCC4 ABCA7 ABCC2	c2.cp
REACTOME_TRNA_AMINOACYLATION	0.593305	1	-0.284119	-0.921281	1665	42	NARS IARS WARS2 PPA2 VARS2 NARS2 FARSB PARS2 DARS2 FARSA EEF1E1 EPRS EARS2 TARS2 WARS SARS DARS IARS2 AIMP2 AIMP1 AARS2 GARS YARS2 RARS YARS QARS MARS2 FARS2 LARS VARS PPA1 RARS2 LARS2 HARS2 MARS HARS AARS CARS SARS2 KARS CARS2 TARS	c2.cp
REACTOME_STEROID_HORMONES	0.57981	1	0.356362	0.925723	3962	26	LHB CYP19A1 LRP2 HSD17B3 CYP21A2 CYP11A1	c2.cp
REACTOME_AMINE_DERIVED_HORMONES	0.657902	1	-0.336658	-0.859061	2351	15	CGA SLC5A5 TH DDC DIO2	c2.cp
REACTOME_TRANSMEMBRANE_TRANSPORT_OF_SMALL_MOLECULES	0.938347	1	0.222613	0.804503	8933	392	SLC22A12 SLC11A1 SLC16A3 AQP1 SLCO1B1 TF HMOX1 SLC26A9 GABRR2 SLC2A5 AQP3 SLC6A19 SLC27A6 SLCO4A1 SLC13A2 SLC5A11 ABCA8 HK2 TCIRG1 SLC17A1 SLC1A5 SLC44A4 ATP6V0A4 SLC22A11 GNG8 SLC4A9 AQP6 AQP10 SLC4A2 ATP10B SLC2A3 SLC15A3 SLC2A4 SLC35D2 SLC44A1 SLC14A1 SLC7A7 AQP8 SLC22A1 SLC7A2 SLC6A14 ABCA2 ATP4A SLC7A9 ATP6V0E1 SLC7A3 SLC26A6 SLC9A9 SLC44A3 SLC6A12 SLC6A9 SLC30A8 HK3 FTL GNG5 SLC2A1 SLC34A2 …	c2.cp
REACTOME_NUCLEAR_RECEPTOR_TRANSCRIPTION_PATHWAY	0.48812	1	0.342203	0.987684	3553	47	NR4A1 NR4A2 NR4A3 NR0B2 VDR NR5A1 PPARG NR1D1 ESRRB	c2.cp
REACTOME_HOMOLOGOUS_RECOMBINATION_REPAIR_OF_REPLICATION_INDEPENDENT_DOUBLE_STRAND_BREAKS	0.996923	1	-0.182578	-0.465888	3563	15	NBN RAD50 RPA3 BRIP1 BRCA2 ATM TP53BP1 RPA2 RPA1 RAD52 RAD51 MDC1 BRCA1 LIG1 H2AFX	c2.cp
REACTOME_G1_PHASE	0.919722	1	0.251978	0.690044	6472	35	CDKN1A CDKN2A CDKN2C RPS27A PPP2R1B CCNH UBA52 CDK4	c2.cp
REACTOME_TRANSCRIPTION_COUPLED_NER_TC_NER	0.988687	1	0.199826	0.57034	7165	44	POLD1 POLE XAB2 POLR2H GTF2H2B POLR2J POLR2L POLR2F CCNH POLR2G LIG1 RFC2 ERCC5 POLD2 POLD4 POLR2I POLR2C	c2.cp
REACTOME_RNA_POL_II_TRANSCRIPTION_PRE_INITIATION_AND_PROMOTER_OPENING	0.974099	1	-0.200025	-0.643798	2782	40	GTF2A1 GTF2H3 TAF13 GTF2E1 TBP GTF2H1 GTF2H4 GTF2A2 POLR2K POLR2D TAF4 POLR2A TAF1 TAF5 POLR2E TAF9 ERCC2 TAF4B GTF2H2 TAF11 CDK7 POLR2B MNAT1 ERCC3 TAF6 GTF2F2 TAF12 GTF2F1 POLR2C TAF10 POLR2I POLR2G CCNH POLR2F POLR2L GTF2E2 POLR2J GTF2H2B POLR2H GTF2B	c2.cp
REACTOME_GLUCAGON_SIGNALING_IN_METABOLIC_REGULATION	0.867257	1	-0.248399	-0.755008	2645	31	GNG10 PRKAR2B PRKACB PRKAR1A ADCY1 GNG13 GNG2	c2.cp
REACTOME_MRNA_PROCESSING	0.980041	1	-0.191881	-0.768857	1423	151	NUDT21 GTF2H3 EIF4E HNRNPH2 SRSF11 NUPL2 CDC40 GTF2H1 RNGTT SEH1L CPSF2 GTF2H4 NUP50 NCBP2 NUP93 HNRNPR NUP155 SNRPB2 RNMT ADAR SRSF9 HNRNPA0 NUP133 NUP37 POLR2K PAPOLA POLR2D LSM11 NCBP1 ADARB1 NUP153 HNRNPA3 HNRNPK CSTF1 POLR2A POLR2E SLBP NUP54 SRSF5 A1CF ERCC2 SNRPE CSTF2 NUP43 RBM5 NUP210 GTF2H2 RNPS1 CPSF7 RBMX SRSF6 SNRPD1 NUP35 SRRM1 POM121 CDK7 DHX9 SRSF2 CLP1 SF3A1 EFTUD2 POLR2B RBM8A C…	c2.cp
REACTOME_SIGNALING_BY_PDGF	0.713106	1	0.269719	0.880852	5870	116	SPP1 NR4A1 COL2A1 CDKN1A THBS1 COL4A5 STAT5A ITPR3 COL9A2 COL1A1 COL4A1 GRB7 THBS2 COL4A2 COL9A3 STAT3 FOXO4 COL6A2 BCAR1 COL4A4 RPS6KB2 FOXO1 PHLPP1 PLAT PLCG1 COL6A1 PDGFRB	c2.cp
REACTOME_ASSOCIATION_OF_TRIC_CCT_WITH_TARGET_PROTEINS_DURING_BIOSYNTHESIS	0.785369	1	0.301621	0.783523	5367	26	SPHK1 FBXW4 KIF13A CCT3 NOP56 TCP1 FBXW5	c2.cp
REACTOME_PROTEIN_FOLDING	0.575061	1	0.32142	0.938306	4228	50	SPHK1 TUBA1C TUBB6 PFDN5 TUBB2A TBCB PFDN2 TUBB4B FBXW4 KIF13A TUBA3D TBCE TUBB2B TUBB1 CCT3 ACTB NOP56 TUBA4A TCP1 FBXW5 TBCD TUBB3 TUBA1A TBCA CCT5 TUBA1B PFDN6 CCT7	c2.cp
REACTOME_PEROXISOMAL_LIPID_METABOLISM	0.956777	1	-0.224246	-0.615615	3253	20	CROT FAR1 FAR2 AGPS SCP2 SLC25A17 PHYH SLC27A2 ACOX1	c2.cp
REACTOME_STRIATED_MUSCLE_CONTRACTION	0.71038	1	0.321107	0.839381	4858	27	MYL4 MYH6 MYL1 MYL3 TNNT1 TPM4 TPM2 TNNI2 MYH3	c2.cp
REACTOME_METABOLISM_OF_NUCLEOTIDES	0.48519	1	0.322994	0.990542	3701	69	AMPD1 TYMP ADA PNP CDA TYMS TK1 ADSSL1 GLRX GPX1 CAT NT5C DPYD IMPDH2 GMPR DTYMK AK2 APRT AMPD3 DGUOK GUK1	c2.cp
REACTOME_METABOLISM_OF_PROTEINS	0.527265	1	0.272002	0.987976	5056	434	SRP9P1 RPL23AP74 RPL34P27 RPL10P9 SPHK1 PLAUR RPL21P75 GALNT6 RPL23AP2 RPS28P7 TUBA1C MUC17 TUBB6 RPL26P30 RPL7AP66 EIF4EBP1 EEF1DP1 B3GNT5 RPL17P36 PIGA B4GALT1 RPS21 HSPD1 RPS4X RPL23AP42 RPS16 RPS27 RPL36A RPS19 ST6GALNAC3 RPS11 RPS15 RPL37A RPL36 MUC16 MUC4 RPL38 B3GNT9 RPS28 RPL9 RPS20 RPS12 RPL39 RPLP2 PRKCSH RPS17 DOHH RPS24 EEF1D PFDN5 RPL30 RPL41 RPL18 RPL31 RPL35 RPL32 CALR RPS7 RPL21P1…	c2.cp
REACTOME_DOWNSTREAM_SIGNAL_TRANSDUCTION	0.999516	1	-0.155542	-0.579884	2065	89	CAMK4 PRKAR2B PDGFRA RASA1 PRKACB RICTOR PRKAR1A ADCY1 KRAS PRKCA PTEN PIK3CA NRAS PIK3CB MAPK1 CREB1 PDPK1 AKT3 PRKCE STAT1 PDE1B CALM1 SOS1 PDE1A	c2.cp
REACTOME_MUSCLE_CONTRACTION	0.926735	1	0.2409	0.69217	6741	46	MYL4 MYH6 MYL1 MYL3 TLN1 TNNT1 TPM4 MYL6 TPM2 TNNI2 MYH3 ITGB5 CALD1 TNNC2 SORBS3 TNNT2 TCAP VCL ITGA1	c2.cp
REACTOME_MRNA_SPLICING	0.723733	1	0.270182	0.870726	5854	104	SNRPG YBX1 HNRNPF SRSF3 POLR2H POLR2J PTBP1 SF3B4 SF3B2 CPSF1 DHX38 SNRPB POLR2L POLR2F SF3A2 SNRPA SRSF4 POLR2G PHF5A SNRNP70 SRSF7 SNRPD2 LSM2 POLR2I U2AF2 U2AF1 PRPF8 HNRNPUL1 POLR2C SNRNP40 SNRPF TXNL4A PCBP1 DDX23 HNRNPA1 GTF2F1 MAGOH CPSF3 HNRNPM SUGP1 PRPF6 HNRNPD GTF2F2 SMC1A HNRNPL SNRNP200 SNRPA1 FUS HNRNPU SF3B5 SF3B3 HNRNPH1 SF3A3 CCAR1 HNRNPC PABPN1 CD2BP2 SRSF1 SNRPD3 DNAJC8	c2.cp
REACTOME_PROCESSING_OF_CAPPED_INTRONLESS_PRE_MRNA	0.984314	1	-0.19087	-0.540703	3262	23	NUDT21 CPSF2 NCBP2 PAPOLA LSM11 NCBP1 CSTF1 SLBP SNRPE CSTF2 CPSF7 CLP1 CSTF3 PCF11 ZNF473 SNRPD3 PABPN1 CPSF3 SNRPF SNRPB CPSF1 LSM10 SNRPG	c2.cp
REACTOME_CITRIC_ACID_CYCLE_TCA_CYCLE	0.919435	1	-0.243455	-0.66835	3126	20	DLD NNT SUCLA2 SDHD SDHC	c2.cp
REACTOME_NUCLEOTIDE_EXCISION_REPAIR	0.982096	1	0.208916	0.607601	7185	49	POLD1 POLE XAB2 DDB2 POLR2H GTF2H2B POLR2J POLR2L POLR2F CCNH POLR2G LIG1 RFC2 XPC ERCC5 POLD2 POLD4 POLR2I POLR2C	c2.cp
REACTOME_AXON_GUIDANCE	0.916158	1	0.228032	0.79783	8249	239	COL2A1 ITGB3 TYROBP RAC2 RHOG ITGA5 TREM2 COL4A5 PLXNB3 TRPC4 NRTN RPS6KA1 GDNF PLXNB1 VASP CNTN2 PTPRC COL9A2 COL1A1 CD72 RND1 MSN COL4A1 SCN4A RHOC DNM2 FES RRAS UNC5B SEMA4D ITGA2 EZR TLN1 COL4A2 COL9A3 SEMA6A SIAH2 LIMK2 DOCK1	c2.cp
REACTOME_ACTIVATION_OF_CHAPERONE_GENES_BY_XBP1S	0.551738	1	0.333772	0.952648	3998	44	LMNA XBP1 TLN1 SULT1A4 DNAJB11 ACADVL WIPI1 ZBTB17 SULT1A3 DDX11 CXXC1 TSPYL2 HDGF YIF1A KDELR3 SYVN1 SHC1	c2.cp
REACTOME_REGULATION_OF_INSULIN_SECRETION_BY_GLUCAGON_LIKE_PEPTIDE1	0.7735	1	-0.258076	-0.825703	2229	39	GLP1R AKAP5 GNG10 PRKAR2B PRKACB PRKAR1A KCNS3 GNG13 GNG2 KCNC2 GNB5 KCNB1 GNB1 GNG4 GNB4 PRKAR2A GNG3	c2.cp
REACTOME_G_ALPHA_Q_SIGNALLING_EVENTS	0.967951	1	0.212786	0.722264	8365	167	EDN2 F2RL3 RGS2 FFAR3 KISS1R GPR4 P2RY2 FPR2 GNG8 GAST BDKRB1 BDKRB2 ITPR3 NMB PTGER1 SAA1 FFAR2 TACR3 QRFP UTS2R P2RY6 AGT PLCB3 GPR132 GNG5 LPAR1 GCGR OXT EDNRA GNGT2 PLCB2 XCL2 TRHR NTSR2 CYSLTR2 FFAR1 LTB4R	c2.cp
REACTOME_NCAM1_INTERACTIONS	0.463127	1	0.360338	1.00699	3296	39	COL2A1 COL4A5 NRTN GDNF CNTN2 COL9A2 COL1A1 COL4A1 COL4A2 COL9A3 COL6A2 COL4A4	c2.cp
REACTOME_REGULATION_OF_INSULIN_SECRETION	0.870698	1	-0.224639	-0.824751	1871	82	CDX2 GLP1R PLCB1 ISL1 AKAP5 MARCKS GNG10 PRKAR2B SPCS3 PRKACB PRKAR1A PRKCA KCNS3 GNG13 GNAQ GNG2 PCSK1 KCNC2 VAMP2 SNAP25	c2.cp
REACTOME_NCAM_SIGNALING_FOR_NEURITE_OUT_GROWTH	0.870113	1	0.253223	0.765381	6564	63	COL2A1 COL4A5 NRTN GDNF CNTN2 COL9A2 COL1A1 COL4A1 COL4A2 COL9A3	c2.cp
REACTOME_INHIBITION_OF_INSULIN_SECRETION_BY_ADRENALINE_NORADRENALINE	0.999851	1	0.134811	0.343835	6722	24	GNG8 GNG5 GNGT2 GNB2 GNB3 ADRA2A GNAI2	c2.cp
REACTOME_NUCLEOTIDE_LIKE_PURINERGIC_RECEPTORS	0.725874	1	-0.319144	-0.814368	2594	15	P2RY14 P2RY12 P2RY13 GPR17 P2RY4	c2.cp
REACTOME_TRANSPORT_OF_MATURE_MRNA_DERIVED_FROM_AN_INTRONLESS_TRANSCRIPT	0.931498	1	-0.229268	-0.696858	2841	31	EIF4E NUPL2 SEH1L CPSF2 NUP50 NCBP2 NUP93 NUP155 NUP133 NUP37 NCBP1 NUP153 NUP54 NUP43 NUP210 NUP35 POM121 RAE1 TPR NUP214 RANBP2 AAAS NUP205 CPSF3 NUP62 NUP107 NUP88 NXF1 NUP85 CPSF1 NUP188	c2.cp
REACTOME_GLUCAGON_TYPE_LIGAND_RECEPTORS	0.530426	1	0.360174	0.960436	3660	30	GHRH GIPR GNG8 SCT GNG5 GCGR GNGT2	c2.cp
REACTOME_G_ALPHA1213_SIGNALLING_EVENTS	0.764133	1	0.271861	0.839829	5879	73	RAC2 RHOG FGD2 GNG8 PLXNB1 PLEKHG2 PREX1 RHOC VAV1 GNG5 ARHGEF1 GNGT2 GNA13 RHOB ARHGAP4 TBXA2R ARHGEF16 GNA12 GNB2 GNB3	c2.cp
REACTOME_FANCONI_ANEMIA_PATHWAY	0.980825	1	0.217033	0.526636	6444	19	RPS27A FANCB FANCE FANCG ZBTB32 FANCC BRCA1 UBA52	c2.cp
REACTOME_FORMATION_OF_RNA_POL_II_ELONGATION_COMPLEX_	0.944844	1	-0.220213	-0.691594	2757	36	GTF2H3 CCNT2 GTF2H1 TCEA1 GTF2H4 NCBP2 POLR2K POLR2D NCBP1 SUPT16H POLR2A POLR2E ERCC2 GTF2H2 CCNT1 CDK7 POLR2B MNAT1 CDK9 SUPT4H1 ERCC3 SSRP1 GTF2F2 GTF2F1 POLR2C CTDP1 SUPT5H POLR2I ELL POLR2G CCNH POLR2F POLR2L POLR2J GTF2H2B POLR2H	c2.cp
REACTOME_MRNA_3_END_PROCESSING	0.947299	1	-0.219321	-0.676528	2857	33	NUDT21 SRSF11 CDC40 CPSF2 NCBP2 SRSF9 PAPOLA NCBP1 CSTF1 SRSF5 CSTF2 RNPS1 CPSF7 SRSF6 SRRM1 SRSF2 CLP1 RBM8A CSTF3 PCF11 NFX1 UPF3B SRSF1 PABPN1 CPSF3 MAGOH U2AF1 U2AF2 SRSF7 SRSF4 DHX38 CPSF1 SRSF3	c2.cp
REACTOME_POST_TRANSLATIONAL_MODIFICATION_SYNTHESIS_OF_GPI_ANCHORED_PROTEINS	0.881907	1	-0.251888	-0.733016	2792	26	PGAP1 PIGW PIGN PIGX PIGB PIGF PIGK	c2.cp
REACTOME_CYCLIN_A_B1_ASSOCIATED_EVENTS_DURING_G2_M_TRANSITION	0.986463	1	0.209726	0.483221	6339	15	CDC25C CCNB2 CCNH CCNA1 CDC25B MNAT1 WEE1 CDK7 PKMYT1 CCNA2 CDC25A CCNB1 PLK1	c2.cp
REACTOME_ELONGATION_ARREST_AND_RECOVERY	0.846371	1	0.287889	0.734262	5690	24	POLR2H POLR2J POLR2L POLR2F POLR2G ELL POLR2I SUPT5H CTDP1 POLR2C GTF2F1 GTF2F2 SSRP1	c2.cp
REACTOME_SLC_MEDIATED_TRANSMEMBRANE_TRANSPORT	0.80232	1	0.24723	0.862073	7191	230	SLC22A12 SLC11A1 SLC16A3 SLCO1B1 SLC26A9 SLC2A5 SLC6A19 SLC27A6 SLCO4A1 SLC13A2 SLC5A11 HK2 SLC17A1 SLC1A5 SLC44A4 SLC22A11 SLC4A9 SLC4A2 SLC2A3 SLC15A3 SLC2A4 SLC35D2 SLC44A1 SLC14A1 SLC7A7 SLC22A1 SLC7A2 SLC6A14 SLC7A9 SLC7A3 SLC26A6 SLC9A9 SLC44A3 SLC6A12 SLC6A9 SLC30A8 HK3 SLC2A1 SLC34A2 SLC39A1 SLC2A9 SLCO1A2	c2.cp
REACTOME_ADP_SIGNALLING_THROUGH_P2RY1	0.989628	1	-0.183116	-0.524343	3243	24	GNG10 GNG13 GNAQ GNG2 P2RY1 GNB5 GNB1 MAPK14 GNG4 GNB4 GNG3	c2.cp
REACTOME_G_BETA_GAMMA_SIGNALLING_THROUGH_PLC_BETA	0.946127	1	0.250118	0.606916	6216	19	GNG8 PLCB3 GNG5 GNGT2 PLCB2 GNB2 GNB3	c2.cp
REACTOME_ADHERENS_JUNCTIONS_INTERACTIONS	0.836802	1	-0.266553	-0.755099	2773	23	CADM2 CDH2 CDH8 CDH7 CADM1 CDH11 CDH4 CDH6 CTNNB1 CDH13 CDH9	c2.cp
REACTOME_LYSOSOME_VESICLE_BIOGENESIS	0.968446	1	0.228891	0.577742	6475	23	VAMP8 CTSZ DNM2 BLOC1S1	c2.cp
REACTOME_G_BETA_GAMMA_SIGNALLING_THROUGH_PI3KGAMMA	0.750446	1	0.316578	0.807434	5045	24	PIK3R6 PIK3R5 GNG8 GNG5 GNGT2 PIK3CG GNB2 GNB3	c2.cp
REACTOME_TRANSPORT_OF_GLUCOSE_AND_OTHER_SUGARS_BILE_SALTS_AND_ORGANIC_ACIDS_METAL_IONS_AND_AMINE_COMPOUNDS	0.495619	1	0.313586	0.986855	3902	84	SLC22A12 SLC11A1 SLC16A3 SLC2A5 SLC6A19 SLC13A2 SLC5A11 SLC44A4 SLC22A11 SLC2A3 SLC2A4 SLC44A1 SLC14A1 SLC22A1 SLC6A14 SLC44A3 SLC6A12 SLC6A9 SLC30A8 SLC2A1 SLC39A1 SLC2A9	c2.cp
REACTOME_SPHINGOLIPID_METABOLISM	0.980661	1	-0.19399	-0.677806	2433	61	GBA3 SGPP1 ACER1 COL4A3BP PPM1L ASAH2 STS ARSK NEU4 SMPD3 ARSG SGMS1 NEU3 VAPB ASAH1 UGCG SPTLC1 GBA GALC ACER3	c2.cp
REACTOME_CELL_CELL_JUNCTION_ORGANIZATION	0.811067	1	0.273604	0.792713	5906	48	CLDN11 CLDN19 CLDN5 CLDN2 F11R CLDN6 JUP CDH1 CDH5 PARD3 CTNNA1 CLDN7 PARD6G CLDN10	c2.cp
REACTOME_G_ALPHA_Z_SIGNALLING_EVENTS	0.988253	1	0.200511	0.570199	7150	43	ADRA2B GNG8 GNG5 GNGT2 GNB2 GNB3 RGS19 PRKCQ ADRA2A ADCY7 ADCY3 GNAI2	c2.cp
REACTOME_SIGNALING_BY_ROBO_RECEPTOR	0.965826	1	-0.208975	-0.621442	3023	28	CAP2 ROBO2 ROBO1 SLIT2 PFN2 SOS1 PAK6 SRGAP3	c2.cp
REACTOME_TIGHT_JUNCTION_INTERACTIONS	0.489089	1	0.38408	0.988652	3316	25	CLDN11 CLDN19 CLDN5 CLDN2 F11R CLDN6 PARD3 CLDN7 PARD6G CLDN10	c2.cp
REACTOME_G_PROTEIN_BETA_GAMMA_SIGNALLING	0.687573	1	0.327278	0.855512	4702	27	PIK3R6 PIK3R5 GNG8 PLCB3 GNG5 GNGT2 PLCB2 PIK3CG GNB2 GNB3	c2.cp
REACTOME_TRANSPORT_OF_INORGANIC_CATIONS_ANIONS_AND_AMINO_ACIDS_OLIGOPEPTIDES	0.775938	1	-0.23369	-0.872435	1592	90	SLC17A6 SLC1A7 SLC9A3 SLC38A4 SLC5A5 SLC5A8 SLC32A1 SLC38A5 SLC9A2 SLC9A7 SLC17A8 SLC6A15 SLC4A4 SLC24A3 SLC38A1 SLC4A7 SLC16A10 SLC24A1 SLC8A1 SLC1A1 SLC12A2 SLC12A1 SLC26A4 SLC9A6 SLC8A3 SLC1A2 SLC3A1 SLC36A1 SLC24A4 SLC7A11 SLC12A5 SLC24A2 SLC9A8 SLC6A20 SLC7A6 SLC12A6 SLC4A8 SLC26A1	c2.cp
REACTOME_GOLGI_ASSOCIATED_VESICLE_BIOGENESIS	1	1	0.142273	0.41533	7353	50	VAMP8 DNM2 FTL FTH1 HIP1R TFRC BLOC1S1	c2.cp
REACTOME_FORMATION_OF_TRANSCRIPTION_COUPLED_NER_TC_NER_REPAIR_COMPLEX	0.973963	1	-0.206645	-0.618948	3029	29	GTF2H3 ERCC4 GTF2H1 TCEA1 ERCC8 GTF2H4 POLR2K POLR2D POLR2A POLR2E ERCC2 ERCC6 GTF2H2 CDK7 POLR2B MNAT1 ERCC3 ERCC1 POLR2C POLR2I ERCC5 POLR2G CCNH POLR2F POLR2L POLR2J GTF2H2B POLR2H XAB2	c2.cp
REACTOME_AMINO_ACID_AND_OLIGOPEPTIDE_SLC_TRANSPORTERS	0.719014	1	-0.259165	-0.865532	1954	48	SLC17A6 SLC1A7 SLC38A4 SLC5A5 SLC5A8 SLC32A1 SLC38A5 SLC17A8 SLC6A15 SLC38A1	c2.cp
REACTOME_CDT1_ASSOCIATION_WITH_THE_CDC6_ORC_ORIGIN_COMPLEX	0.576358	1	0.317414	0.93651	4275	54	PSMB9 GMNN PSMB8 RPS27A PSMB10 PSME1 PSMC4 PSMD13 PSMB1 UBA52 PSME2 PSMD9 PSMC5 PSMB5 PSMB4 PSMD6 PSMB6 CDC6 PSMC3 MCM8 PSME4 PSMD4 PSMB3 PSMB7 PSMF1 PSMA2 PSMD8 PSMD3	c2.cp
REACTOME_DEADENYLATION_OF_MRNA	0.987146	1	0.203287	0.482088	6450	17	EIF4A3 EIF4A1 PABPC1 TNKS1BP1 CNOT3 EIF4G1 CNOT10	c2.cp
REACTOME_SIGNAL_AMPLIFICATION	0.990323	1	-0.183989	-0.556073	3069	30	P2RY12 GNG10 GNG13 GNAQ GNG2 P2RY1 GNB5 GNAI1 GNB1 MAPK14 GNG4 GNB4 GNG3	c2.cp
REACTOME_ZINC_TRANSPORTERS	0.805594	1	-0.294709	-0.752018	2879	15	SLC39A10 SLC30A5 SLC30A7 SLC39A8 SLC39A6	c2.cp
REACTOME_DOUBLE_STRAND_BREAK_REPAIR	0.665574	1	-0.310911	-0.862133	2232	21	LIG4 XRCC4 NBN RAD50 RPA3 BRIP1 PRKDC BRCA2	c2.cp
REACTOME_METAL_ION_SLC_TRANSPORTERS	0.865759	1	0.283618	0.711638	5784	22	SLC11A1 SLC30A8 SLC39A1	c2.cp
REACTOME_SMOOTH_MUSCLE_CONTRACTION	0.985046	1	0.212705	0.536889	6586	23	TLN1 TPM4 MYL6 TPM2 ITGB5 CALD1 SORBS3 VCL ITGA1 LMOD1	c2.cp
REACTOME_DEADENYLATION_DEPENDENT_MRNA_DECAY	1	1	0.136389	0.386283	7193	42	EIF4A3 EIF4A1 PATL1 EDC4 PABPC1 EXOSC1 LSM2 TNKS1BP1 CNOT3 EXOSC8 DCPS EXOSC4 EXOSC7 EIF4G1 CNOT10 LSM1 DCP1B EXOSC2 EDC3 EXOSC9 LSM3 LSM4 CNOT8 PARN CNOT2	c2.cp
REACTOME_THROMBOXANE_SIGNALLING_THROUGH_TP_RECEPTOR	0.923825	1	0.258503	0.648622	6172	22	GNG8 GNG5 GNGT2 GNA13 GNA15 TBXA2R GNB2 GNB3	c2.cp
REACTOME_ADP_SIGNALLING_THROUGH_P2RY12	0.93943	1	-0.233014	-0.639686	3194	20	P2RY12 GNG10 GNG13 GNG2 GNB5 GNAI1 GNB1 GNG4 GNB4 GNG3	c2.cp
REACTOME_CELL_JUNCTION_ORGANIZATION	0.484142	1	0.323257	0.99135	3693	69	CLDN11 CLDN19 LIMS3 CLDN5 CLDN2 ITGB4 F11R FLNC VASP CLDN6 JUP LIMS1 CDH1 CDH5 PARD3 FBLIM1 CTNNA1 CLDN7 PARD6G CLDN10 CD151 FERMT2 ILK ITGB1	c2.cp
REACTOME_AMINE_COMPOUND_SLC_TRANSPORTERS	0.599756	1	-0.318284	-0.911388	1965	24	SLC6A2 SLC18A2 SLC5A7 SLC18A1 SLC6A5 SLC6A1 SLC6A15 SLC44A5	c2.cp
REACTOME_PYRUVATE_METABOLISM	0.712214	1	0.343338	0.824451	4664	18	SLC16A3 PDK4 BSG PDK1 SLC16A8	c2.cp
REACTOME_GLUCOSE_TRANSPORT	0.656925	1	0.31841	0.877714	4652	36	HK2 SLC2A3 SLC2A4 HK3 SLC2A1 NUP188 NUP85 NUP88 NUP107 NUP62 G6PC NUP205 AAAS	c2.cp
REACTOME_FRS2_MEDIATED_CASCADE	0.696727	1	-0.277559	-0.861649	2085	34	FGF6 FGF23 KL FGF9 KRAS NRAS MAPK1 FGF7 FRS2	c2.cp
REACTOME_MITOTIC_G1_G1_S_PHASES	0.531961	1	0.29347	0.971713	4443	131	CDKN1A RBBP4P1 CDC45 MYC MCM10 TYMS CDK2 MCM5 PSMB9 CDKN2A CCNE2 RPA4 CDKN2C POLE PSMB8 HDAC1 RPS27A MCM7 PSMB10 PSME1 PSMC4 PPP2R1B DHFR CCNH POLA1 MYBL2 PSMD13 PSMB1 UBA52 PRIM2 PSME2 CDK4 PSMD9 PSMC5 PSMB5 PSMB4 PSMD6 PSMB6 CDC6 PSMC3 MCM8	c2.cp
REACTOME_PI_3K_CASCADE	0.933225	1	0.237549	0.696507	6861	52	NR4A1 CDKN1A FGF4 FGFR4 FGFR2 FGF1 FOXO4 RPS6KB2 FGF17 FOXO1 PHLPP1 GAB1 FGFR1 FGF10 CASP9 FGF18 FGF8	c2.cp
REACTOME_DOWNSTREAM_SIGNALING_OF_ACTIVATED_FGFR	0.970631	1	-0.198147	-0.744524	1982	93	FGF6 FGF23 KL FGF9 CAMK4 PRKAR2B PRKACB RICTOR PRKAR1A ADCY1 KRAS PRKCA PTEN PIK3CA NRAS MAPK1 FGF7 CREB1 FRS2 PDPK1 AKT3 PRKCE PDE1B CALM1 SOS1 PDE1A FGF2 CDKN1B	c2.cp
REACTOME_REGULATION_OF_MITOTIC_CELL_CYCLE	0.934234	1	0.230734	0.718034	7258	77	UBE2C CDK2 PSMB9 CDC20 PSMB8 RPS27A PTTG1 CDC26 AURKA PSMB10 PSME1 PSMC4 PSMD13 PSMB1 UBA52 PSME2 PSMD9 PSMC5 PSMB5 PSMB4 PSMD6 PSMB6 PSMC3 PSME4 PSMD4 ANAPC2 PSMB3 PSMB7 PSMF1 PSMA2 PSMD8 PSMD3 ANAPC11 CCNA1 PSMA7 CDC16	c2.cp
REACTOME_MITOTIC_M_M_G1_PHASES	0.998374	1	0.182187	0.615958	8595	160	CDC45 MCM10 CDK2 MCM5 PSMB9 CENPA RPA4 GMNN CDC20 RPS27 POLE PSMB8 MAPRE1 KIF2C KIF20A RPS27A MCM7 NDC80 PMF1 PSMB10 PSME1 SEC13 PSMC4 KIF18A NUDC PPP2R1B CENPT POLA1 PSMD13 NUP85 STAG1 MAD1L1 PSMB1 UBA52 PRIM2 RCC2 PSME2 SMC3 PSMD9 PSMC5 CENPL PSMB5 PSMB4 PSMD6 PSMB6 CDC6 PSMC3 MCM8 PSME4 B9D2 POLA2 PSMD4 NUP107 PSMB3 ZW10 PSMB7 PSMF1 MCM6	c2.cp
REACTOME_MYOGENESIS	0.96417	1	0.231383	0.595599	6538	25	MYOD1 MYF6 CTNNA1 TCF12 NEO1 ABL1	c2.cp
REACTOME_ACTIVATION_OF_KAINATE_RECEPTORS_UPON_GLUTAMATE_BINDING	0.883548	1	-0.244766	-0.739762	2738	30	PLCB1 GNG10 GRIK3 GNG13 GNG2 GRIK2 NCALD CALM1 GNB5 GNB1 DLG1 GNG4 GNB4 GRIK1 GNG3 DLG3 CALM3	c2.cp
REACTOME_SYNTHESIS_AND_INTERCONVERSION_OF_NUCLEOTIDE_DI_AND_TRIPHOSPHATES	0.862399	1	-0.271619	-0.723822	2976	18	RRM2 RRM2B CMPK1	c2.cp
REACTOME_JNK_C_JUN_KINASES_PHOSPHORYLATION_AND_ACTIVATION_MEDIATED_BY_ACTIVATED_HUMAN_TAK1	0.674965	1	0.363931	0.852935	4391	16	NOD2 RIPK2 IRAK2 NOD1 TAB2 TRAF6	c2.cp
REACTOME_SHC_MEDIATED_CASCADE	0.662457	1	-0.301023	-0.876002	2097	26	FGF6 FGF23 KL FGF9	c2.cp
REACTOME_THROMBIN_SIGNALLING_THROUGH_PROTEINASE_ACTIVATED_RECEPTORS_PARS	0.689253	1	0.318775	0.855279	4790	31	F2RL3 GNG8 GNG5 GNGT2 GNA13 GNA15 F2RL2 ARRB2 GNA12 GNB2 GNB3	c2.cp
REACTOME_MITOTIC_G2_G2_M_PHASES	1	1	-0.129321	-0.472646	2206	78	PRKAR2B PLK4 E2F3 CEP135 CEP41 PAFAH1B1 FGFR1OP XPO1 AKAP9 TUBGCP5 CDK1 NINL TUBGCP3 CEP57 CETN2 YWHAG PCM1 DCTN1 CLASP1 PRKACA PLK1 CCNB1 YWHAE CDC25A CCNA2 CEP63 DYNC1H1 PPP2R1A CEP70 NEK2 NEDD1 PKMYT1 CEP290 TUBGCP6 CNTRL DCTN3 ACTR1A TUBG2 CKAP5 CSNK1D CDK7 SDCCAG8 CEP250 WEE1 CEP72 HAUS2 DCTN2 CEP76 MNAT1 TUBB4A CDC25B E2F1 TUBGCP2 TUBG1 CCNA1 TUBA1A PCNT CEP164 TUBA4A DYNC1I2 TUBB CDK5RAP2 …	c2.cp
REACTOME_DNA_REPAIR	1	1	0.159842	0.513932	8067	102	POLD1 POLE ALKBH2 MGMT H2AFX MAD2L2 XAB2 DDB2 RPS27A FANCB FANCE POLR2H GTF2H2B POLR2J FANCG POLR2L POLR2F CCNH ZBTB32 FANCC REV1 POLR2G LIG1 RFC2 BRCA1 UBA52 XPC ERCC5 ALKBH3 MUTYH POLD2 NTHL1 POLD4 POLR2I	c2.cp
REACTOME_RNA_POL_II_PRE_TRANSCRIPTION_EVENTS	0.970177	1	-0.200124	-0.680095	2569	52	GTF2A1 GTF2H3 TAF13 CCNT2 GTF2E1 TBP GTF2H1 TCEA1 GTF2H4 NCBP2 GTF2A2 POLR2K POLR2D NCBP1 TAF4 SUPT16H POLR2A TAF1 TAF5 POLR2E TAF9 ERCC2 TAF4B GTF2H2 TAF11 CCNT1 CDK7 POLR2B MNAT1 CDK9 SUPT4H1 ERCC3 TAF6 SSRP1 GTF2F2 TAF12 GTF2F1 POLR2C TAF10 CTDP1 SUPT5H POLR2I ELL POLR2G CCNH POLR2F POLR2L GTF2E2 POLR2J GTF2H2B POLR2H GTF2B	c2.cp
REACTOME_POST_TRANSLATIONAL_PROTEIN_MODIFICATION	0.851685	1	-0.214712	-0.878378	1136	175	MUC6 EIF5A2 MUC21 B4GALT6 MGAT4C MAN1A1 MUCL1 PGAP1 EDEM3 SEC23A C1GALT1 ALG10B PIGW GALNT1 MAN1A2 F7 PIGN ST8SIA6 GALNT13 TUSC3 MANEA ALG6 B3GNT2 PIGX MCFD2 ST8SIA2 PIGB ALG10 PIGF PIGK GALNT7 STS ARSK GALNT3 ALG13 LMAN1 SEMA6D ST3GAL2 MGAT4A ARSG MGAT3 MUC5AC	c2.cp
REACTOME_L1CAM_INTERACTIONS	0.97814	1	-0.195106	-0.716322	2102	82	CD24 RPS6KA6 CNTN1 SCN5A SCN2A NRCAM SCN8A KIF4B NCAN ANK1 LAMB1 CNTN6 SDCBP MAPK1 SCN1B ANK3 SCN2B KCNQ3 KIF4A DCX CLTC SCN7A ALCAM RPS6KA3 NRP1 ITGAV SPTBN2	c2.cp
REACTOME_NETRIN1_SIGNALING	0.913074	1	-0.229846	-0.730419	2625	38	DCC NTN4 TRPC3 TRPC5 UNC5D WASL ROBO1 SLIT2	c2.cp
REACTOME_METABOLISM_OF_LIPIDS_AND_LIPOPROTEINS	0.985832	1	0.210205	0.76432	9462	448	PLA2G2E FABP4 ANGPTL4 PLIN2 PLA2G2A SLCO1B1 SPHK1 G0S2 LHB CH25H CYP19A1 LRP2 PIK3R6 TEAD4 ELOVL1 ELOVL3 PIK3R5 LDLR PLA2G1B ACSL5 HSD17B3 GLA SLC44A4 SREBF1 LIPE PLD1 APOA5 LDLRAP1 TEAD3 AMN CYP27A1 CERS2 APOE ACSL1 PLA2G16 SLC44A1 SLC10A2 ELOVL5 HSD17B7 HSD3B7 FADS1 PIP4K2A HSPG2 AGT CYP21A2 GAL3ST1 GPAT2 SLC44A3 SMPD2 PLD2 SLC25A1 DHCR7 PPARG NR1D1 LSS MED26 CPT1B SLCO1A2 CYP11A1 ABCD1 TECR PL…	c2.cp
REACTOME_SIGNAL_TRANSDUCTION_BY_L1	0.663242	1	0.321272	0.875066	4647	34	ITGB3 ITGA5 RPS6KA1	c2.cp
REACTOME_FATTY_ACID_TRIACYLGLYCEROL_AND_KETONE_BODY_METABOLISM	0.993972	1	0.193293	0.655167	8574	164	ANGPTL4 PLIN2 G0S2 TEAD4 ELOVL1 ELOVL3 ACSL5 SREBF1 APOA5 TEAD3 ACSL1 ELOVL5 FADS1 AGT GPAT2 SLC25A1 PPARG NR1D1 MED26 CPT1B TECR	c2.cp
REACTOME_RECYCLING_PATHWAY_OF_L1	0.887783	1	0.270204	0.701911	6067	26	RPS6KA1 MSN DNM2 EZR	c2.cp
REACTOME_RESPIRATORY_ELECTRON_TRANSPORT	0.648413	1	0.296199	0.898017	4901	64	NDUFB7 NDUFA3 COX6B1 NDUFA12 NDUFB10 COX4I1 NDUFA13 NDUFA1 NDUFS5 UQCR11 NDUFA11 NDUFB4 UQCRQ COX6A1 NDUFS7 COX5A UQCRB NDUFB8 UQCRH NDUFV2 NDUFB1 COX7C NDUFB3 ETFB NDUFS8 NDUFB9 NDUFB2 COX7B NDUFS4 COX5B NDUFA6 SDHB NDUFS6 NDUFC1 NDUFAB1 SDHA NDUFA2 NDUFA7 UQCRHL CYC1 NDUFS3 NDUFS2 COX6C NDUFA8	c2.cp
REACTOME_ASPARAGINE_N_LINKED_GLYCOSYLATION	0.508966	1	-0.265347	-0.972209	1106	80	B4GALT6 MGAT4C MAN1A1 EDEM3 SEC23A ALG10B MAN1A2 ST8SIA6 TUSC3 MANEA ALG6 MCFD2 ST8SIA2 ALG10 ALG13 LMAN1 MGAT4A MGAT3	c2.cp
REACTOME_ASSEMBLY_OF_THE_PRE_REPLICATIVE_COMPLEX	0.729357	1	0.283004	0.855397	5502	63	MCM5 PSMB9 GMNN PSMB8 RPS27A MCM7 PSMB10 PSME1 PSMC4 PSMD13 PSMB1 UBA52 PSME2 PSMD9 PSMC5 PSMB5 PSMB4 PSMD6 PSMB6 CDC6 PSMC3 MCM8 PSME4 PSMD4 PSMB3 PSMB7 PSMF1 MCM6 PSMA2 PSMD8 PSMD3	c2.cp
REACTOME_BIOSYNTHESIS_OF_THE_N_GLYCAN_PRECURSOR_DOLICHOL_LIPID_LINKED_OLIGOSACCHARIDE_LLO_AND_TRANSFER_TO_A_NASCENT_PROTEIN	0.876397	1	-0.249784	-0.742797	2743	28	ALG10B ALG6 ALG10 ALG13 RFT1 DOLK MPI ALG9 ALG11 PMM1 GMPPB ALG14 DPM2 DPM1 ALG2 PGM3 PMM2 ALG8 DOLPP1 ALG1 DPAGT1 GNPNAT1 ALG5 ALG3 DPM3 ALG12 GMPPA GFPT2	c2.cp
REACTOME_GLOBAL_GENOMIC_NER_GG_NER	0.998855	1	0.15957	0.432154	6976	33	POLD1 POLE DDB2 GTF2H2B CCNH LIG1 RFC2 XPC ERCC5 POLD2 POLD4	c2.cp
REACTOME_CGMP_EFFECTS	0.454969	1	-0.366264	-0.993502	1560	19	PDE10A PDE6A KCNMB3 PDE5A KCNMB2 PRKG2 PDE1B PDE1A	c2.cp
REACTOME_AMINO_ACID_SYNTHESIS_AND_INTERCONVERSION_TRANSAMINATION	0.927493	1	0.272497	0.627848	5960	15	PHGDH GLUL PSAT1 GPT2 GPT PYCR1 GLS2	c2.cp
REACTOME_NEPHRIN_INTERACTIONS	0.710289	1	-0.30537	-0.828324	2436	19	WASL PIK3CA PIK3CB CD2AP	c2.cp
REACTOME_PLATELET_HOMEOSTASIS	0.982601	1	-0.192675	-0.702156	2258	75	GUCY1A2 PDE10A PDE6A GNG10 KCNMB3 PDE5A TRPC3 GUCY1A3 KCNMB2 LRP8 PPP2R5E NOS1 ATP2B2 PPP2R5C GNG13 GNG2 SLC8A1 ATP2A2 PPP2CB PRKG2 TRPC6 GUCY1B3 SLC8A3 PDE1B NOS2 PDE1A GNB5 ATP2B3 GNB1 MAPK14 STIM1 PRKG1 GNG4 PPP2CA GNB4 GNG3 APOB PDE3B	c2.cp
REACTOME_AQUAPORIN_MEDIATED_TRANSPORT	0.798929	1	0.278538	0.80393	5816	47	AQP1 AQP3 GNG8 AQP6 AQP10 AQP8 GNG5 GNGT2	c2.cp
REACTOME_RAP1_SIGNALLING	0.88028	1	-0.266472	-0.679964	3146	15	RASGRP1 PRKACB YWHAZ	c2.cp
REACTOME_PLATELET_CALCIUM_HOMEOSTASIS	0.842632	1	-0.281735	-0.728667	2944	16	TRPC3 ATP2B2 SLC8A1 ATP2A2 TRPC6 SLC8A3 ATP2B3	c2.cp
REACTOME_PROSTACYCLIN_SIGNALLING_THROUGH_PROSTACYCLIN_RECEPTOR	0.912366	1	0.272558	0.654487	5975	18	GNG8 PTGIR GNG5 GNGT2 GNB2 GNB3	c2.cp
REACTOME_INCRETIN_SYNTHESIS_SECRETION_AND_INACTIVATION	0.955164	1	0.247913	0.587916	6241	17	GATA4 FFAR1 LEP PAX6 SEC11A GNB3 GRP	c2.cp
REACTOME_SYNTHESIS_SECRETION_AND_INACTIVATION_OF_GLP1	0.612028	1	-0.348855	-0.890182	2187	15	CDX2 SPCS3 GNG13 PCSK1 SPCS2 SPCS1 CTNNB1	c2.cp
REACTOME_REGULATION_OF_WATER_BALANCE_BY_RENAL_AQUAPORINS	0.986284	1	0.205998	0.577776	7046	40	AQP1 AQP3 GNG8 GNG5 GNGT2	c2.cp
REACTOME_DESTABILIZATION_OF_MRNA_BY_BRF1	0.751492	1	0.336213	0.797318	4910	17	ZFP36L1 MAPKAPK2 EXOSC1 EXOSC8 EXOSC4 EXOSC7	c2.cp
REACTOME_TRAF6_MEDIATED_IRF7_ACTIVATION	0.453935	1	-0.350079	-1.00243	1487	24	IFNA8 IFNA4 IFNA6	c2.cp
REACTOME_CIRCADIAN_CLOCK	0.673647	1	0.300855	0.878273	4953	50	SERPINE1 ELOVL3 PER1 SREBF1 BHLHE41 NR1D1 BHLHE40 NAMPT RPS27A	c2.cp
REACTOME_INHIBITION_OF_VOLTAGE_GATED_CA2_CHANNELS_VIA_GBETA_GAMMA_SUBUNITS	0.988846	1	0.20467	0.522012	6648	24	GNG8 KCNJ10 GNG5 GNGT2 KCNJ2 KCNJ5 GNB2 GNB3	c2.cp
REACTOME_GABA_B_RECEPTOR_ACTIVATION	0.997923	1	-0.161956	-0.510354	2882	37	KCNJ16 GNG10 KCNJ3 ADCY1 GNAL GNG2	c2.cp
REACTOME_DESTABILIZATION_OF_MRNA_BY_KSRP	0.696856	1	-0.318811	-0.836028	2415	17	EXOSC6 YWHAZ DCP2 MAPK14 DIS3	c2.cp
REACTOME_DESTABILIZATION_OF_MRNA_BY_TRISTETRAPROLIN_TTP	0.520735	1	0.406977	0.965131	3402	17	ZFP36 MAPKAPK2	c2.cp
REACTOME_ION_TRANSPORT_BY_P_TYPE_ATPASES	0.64623	1	-0.290287	-0.889491	1970	32	ATP12A ATP1A4 ATP8A1 ATP2C2 ATP1B1 ATP2B2 ATP8A2 ATP2A2 ATP2C1 ATP9A	c2.cp
REACTOME_GABA_RECEPTOR_ACTIVATION	0.46639	1	-0.294044	-0.987823	1234	50	GABRA4 GABRA1 GABRB2 KCNJ16 GABRG2 GNG10 GABRA2 KCNJ3 ADCY1 GABRA6 GNAL GNG2	c2.cp
REACTOME_KINESINS	0.538657	1	0.378682	0.955831	3601	23	KIFC1 KLC3 KIF2C KIF20A KIF5A KIF26A KIF18A	c2.cp
REACTOME_REGULATION_OF_IFNA_SIGNALING	0.47542	1	0.415443	0.997593	3113	18	SOCS3 PTPN6 SOCS1 IFNA10	c2.cp
REACTOME_NEGATIVE_REGULATORS_OF_RIG_I_MDA5_SIGNALING	0.931614	1	0.247048	0.658777	6429	30	TNFAIP3 IKBKE NLRC5 HERC5 ISG15 RPS27A RNF125 IRF3 RNF135 UBA52 UBE2L6	c2.cp
REACTOME_RIG_I_MDA5_MEDIATED_INDUCTION_OF_IFN_ALPHA_BETA_PATHWAYS	0.705317	1	0.285446	0.868025	5358	65	S100A12 NFKB2 IRF7 IFNA10 NFKBIA TNFAIP3 IRF1 IKBKE SAA1 RELA NLRC5 HERC5 NFKBIB ISG15 RPS27A RIPK1 RNF125 IRF3 S100B AGER RNF135 CASP10 DHX58 IKBKB UBA52	c2.cp
REACTOME_FORMATION_OF_INCISION_COMPLEX_IN_GG_NER	0.962146	1	-0.220236	-0.610698	3227	21	GTF2H3 ERCC4 RPA3 GTF2H1 RAD23B GTF2H4	c2.cp
REACTOME_ENDOSOMAL_SORTING_COMPLEX_REQUIRED_FOR_TRANSPORT_ESCRT	0.445532	1	-0.346256	-1.00763	1410	26	CHMP4C VPS36 CHMP2B VPS4B VTA1 VPS37A CHMP3 STAM STAM2 CHMP5	c2.cp
REACTOME_SIGNALING_BY_NOTCH	0.83177	1	0.253748	0.809306	6649	95	JUN MYC DLL4 HES1 DLK1 B4GALT1 DLL1 HEYL TLE3 NOTCH4 HEY2 MOV10 MFNG DTX2 HDAC1 RPS27A PSEN1 JAG1 HDAC7 ARRB2 NOTCH3 NCOR2 MIB2 HDAC10 SNW1 MAML2 UBA52 KAT2A ATP2A1 HDAC6	c2.cp
REACTOME_LAGGING_STRAND_SYNTHESIS	0.809161	1	0.31199	0.757051	5316	19	POLD1 POLA1 LIG1 RFC2 PRIM2 DNA2 POLD2 POLD4 POLA2 FEN1	c2.cp
REACTOME_DNA_REPLICATION	0.990214	1	0.20177	0.688803	8600	180	CDKN1A CDC45 MCM10 CDK2 MCM5 PSMB9 CENPA RPA4 GMNN GINS4 CDC20 RPS27 POLD1 POLE PSMB8 MAPRE1 KIF2C KIF20A RPS27A MCM7 NDC80 PMF1 PSMB10 PSME1 SEC13 PSMC4 KIF18A NUDC PPP2R1B GINS2 CENPT POLA1 LIG1 RFC2 PSMD13 NUP85 STAG1 MAD1L1 PSMB1 UBA52 PRIM2 RCC2 PSME2 SMC3 PSMD9 PSMC5 DNA2 CENPL PSMB5 PSMB4 POLD2 PSMD6 PSMB6 CDC6 POLD4 PSMC3 MCM8 PSME4 B9D2	c2.cp
REACTOME_CLEAVAGE_OF_GROWING_TRANSCRIPT_IN_THE_TERMINATION_REGION_	0.981838	1	-0.19102	-0.619397	2756	42	NUDT21 SRSF11 CDC40 CPSF2 NCBP2 SRSF9 PAPOLA LSM11 NCBP1 CSTF1 SLBP SRSF5 SNRPE CSTF2 RNPS1 CPSF7 SRSF6 SRRM1 SRSF2 CLP1 RBM8A CSTF3 PCF11 NFX1 UPF3B ZNF473 SNRPD3 SRSF1 PABPN1 CPSF3 MAGOH SNRPF U2AF1 U2AF2 SRSF7 SRSF4 SNRPB DHX38 CPSF1 SRSF3 LSM10 SNRPG	c2.cp
REACTOME_E2F_MEDIATED_REGULATION_OF_DNA_REPLICATION	0.958196	1	0.230932	0.625421	6692	33	CDC45 TYMS PPP2R1B DHFR POLA1 PRIM2 CDC6 MCM8 POLA2	c2.cp
REACTOME_METABOLISM_OF_CARBOHYDRATES	0.985601	1	0.206094	0.718383	8829	228	PHKA1P1 PGAM2 CD44 SLC2A5 HK2 CHST3 TREH LYVE1 PCK1 CHST6 SLC2A3 SLC2A4 PHKG1 LCT B4GALT1 HYAL2 HYAL1 STAB2 MGAM HSPG2 HK3 PYGL SLC2A1 PFKFB1 CHSY1 PFKFB3 SLC25A1 GALK1 DSE SDC4 NAGLU PRELP TKT BGN TALDO1	c2.cp
REACTOME_SIGNALING_BY_INSULIN_RECEPTOR	0.987053	1	-0.192082	-0.727552	1905	101	FGF6 FGF23 KL PRKAA2 FGF9 PRKAA1 PPM1A EIF4E KRAS ATP6V1A CAB39L PIK3CA NRAS PIK3CB MAPK1 FGF7 FRS2 PDPK1 SHC3 PRKAG2 CAB39 RPS6KB1 SOS1 ATP6V1C1	c2.cp
REACTOME_PURINE_METABOLISM	0.484896	1	0.365003	0.988518	3386	33	AMPD1 ADA PNP ADSSL1 GPX1 CAT NT5C IMPDH2 GMPR APRT AMPD3 DGUOK	c2.cp
REACTOME_RNA_POL_III_TRANSCRIPTION_INITIATION_FROM_TYPE_3_PROMOTER	0.962253	1	0.232349	0.603575	6576	26	POLR2H POLR2L POLR2F ZNF143 POLR3GL SNAPC4 POLR3H SNAPC2 POLR1C POLR3C POLR3K BRF2 SNAPC1 POLR1D SNAPC5 POLR2E POU2F1 POLR2K POLR3E POLR3F POLR3D POLR3B LZTS1 SNAPC3 TBP POLR3A	c2.cp
REACTOME_APOPTOSIS	0.565676	1	0.287678	0.959714	4775	140	HIST1H1D HIST1H1C HIST1H1E LMNA BMF TJP2 PSMB9 TNF GSN TNFRSF10B DSP PKP1 UNC5B CDH1 TNFRSF1A PSMB8 DAPK2 CFLAR CASP6 BAK1 FAS RPS27A RIPK1 BBC3 CASP7 DYNLL1 H1F0 TRADD BCL2L11 PSMB10 PSME1 PSMC4 CASP9 HMGB2 ACIN1 CASP10 BAX PSMD13 FNTA TJP1 PSMB1 UBA52 PLEC PSME2 BCAP31 LMNB1 PSMD9 PSMC5 PRKCQ PSMB5 PSMB4 DFFB PSMD6 PSMB6 BID DAPK3 PSMC3 DIABLO ROCK1 PSME4 DSG3	c2.cp
REACTOME_NEP_NS2_INTERACTS_WITH_THE_CELLULAR_EXPORT_MACHINERY	0.936849	1	-0.229221	-0.667051	2966	26	NUPL2 XPO1 SEH1L NUP50 NUP93 NUP155 NUP133 NUP37 NUP153 NUP54 NUP43 NUP210 NUP35 POM121 RAN RAE1 TPR NUP214 RANBP2 AAAS NUP205 NUP62 NUP107 NUP88 NUP85 NUP188	c2.cp
REACTOME_HIV_INFECTION	0.999886	1	0.152574	0.523146	8742	187	CXCR4 HCK CCR5 PSMB9 DOCK2 PPIAP22 PSMB8 LCK CD4 VPS37B GTF2B RPS27A POLR2H GTF2H2B NUP188 POLR2J PSMB10 PSME1 PSMC4 GTF2E2 POLR2L HLA-A RCC1 POLR2F CCNH POLR2G LIG1 PSMD13 NUP85 PSMB1 UBA52 PSME2 B2M PSMD9 PSMC5 NUP88 VPS28 PSMB5 APOBEC3G PSMB4 PSMD6 PSMB6 ELL POLR2I CD247 AP2S1 PSMC3 SUPT5H PSME4 CTDP1 TAF10 POLR2C PSMD4 VPS37D NUP107 PSMB3 PSMB7 PSMF1 NUP62 GTF2F1 PSMA2 NUP205 PAK2 TAF12 AAAS …	c2.cp
REACTOME_TRANSPORT_OF_RIBONUCLEOPROTEINS_INTO_THE_HOST_NUCLEUS	0.936849	1	-0.229221	-0.667051	2966	26	NUPL2 SEH1L NUP50 NUP93 NUP155 NUP133 KPNA1 NUP37 NUP153 NUP54 NUP43 NUP210 KPNB1 NUP35 POM121 RAE1 TPR NUP214 RANBP2 AAAS NUP205 NUP62 NUP107 NUP88 NUP85 NUP188	c2.cp
REACTOME_HIV_LIFE_CYCLE	1	1	0.143018	0.462371	8122	107	CXCR4 CCR5 PPIAP22 CD4 VPS37B GTF2B RPS27A POLR2H GTF2H2B NUP188 POLR2J GTF2E2 POLR2L RCC1 POLR2F CCNH POLR2G LIG1 NUP85 UBA52 NUP88 VPS28 ELL POLR2I SUPT5H CTDP1 TAF10 POLR2C VPS37D NUP107 NUP62 GTF2F1 NUP205 TAF12 AAAS BANF1 GTF2F2 FEN1 HMGA1 SSRP1 TAF6 PPIA RANBP2 ERCC3	c2.cp
REACTOME_ABORTIVE_ELONGATION_OF_HIV1_TRANSCRIPT_IN_THE_ABSENCE_OF_TAT	0.714047	1	0.341155	0.82782	4691	19	POLR2H POLR2J POLR2L POLR2F POLR2G POLR2I SUPT5H CTDP1 POLR2C GTF2F1 GTF2F2	c2.cp
REACTOME_HOST_INTERACTIONS_OF_HIV_FACTORS	0.998909	1	0.168973	0.553331	8236	119	HCK PSMB9 DOCK2 PPIAP22 PSMB8 LCK CD4 RPS27A NUP188 PSMB10 PSME1 PSMC4 HLA-A RCC1 PSMD13 NUP85 PSMB1 UBA52 PSME2 B2M PSMD9 PSMC5 NUP88 PSMB5 APOBEC3G PSMB4 PSMD6 PSMB6 CD247 AP2S1 PSMC3 PSME4 PSMD4 NUP107 PSMB3 PSMB7 PSMF1 NUP62 PSMA2 NUP205 PAK2 AAAS PSMD8 PSMD3 BANF1 AP1M1 HMGA1 PSMA7 PPIA NPM1 PACS1 RANBP2 AP2A1 NUP214 RAC1 ARF1	c2.cp
REACTOME_RNA_POL_III_TRANSCRIPTION_TERMINATION	0.96415	1	-0.220059	-0.596916	3307	19	NFIB POLR3A LZTS1 POLR3B POLR3D POLR3F POLR3E POLR2K POLR2E SSB POLR1D POLR3K POLR3C POLR1C POLR3H POLR3GL POLR2F POLR2L POLR2H	c2.cp
REACTOME_FORMATION_OF_THE_HIV1_EARLY_ELONGATION_COMPLEX	0.955963	1	-0.22015	-0.659397	2973	29	GTF2H3 GTF2H1 GTF2H4 NCBP2 POLR2K POLR2D NCBP1 POLR2A POLR2E ERCC2 GTF2H2 CDK7 POLR2B MNAT1 SUPT4H1 ERCC3 GTF2F2 GTF2F1 POLR2C CTDP1 SUPT5H POLR2I POLR2G CCNH POLR2F POLR2L POLR2J GTF2H2B POLR2H	c2.cp
REACTOME_LATE_PHASE_OF_HIV_LIFE_CYCLE	0.992658	1	-0.183124	-0.688076	2027	93	GTF2A1 GTF2H3 TAF13 NUPL2 VPS37A XPO1 CCNT2 GTF2E1 TBP GTF2H1 RNGTT SEH1L TCEA1 GTF2H4 NUP50 NCBP2 NUP93 NUP155 RNMT NUP133 NUP37 GTF2A2 POLR2K POLR2D NCBP1 NUP153 NMT2 TAF4 SUPT16H POLR2A TAF1 TAF5 POLR2E NUP54 TAF9 ERCC2 TAF4B NUP43 NUP210 GTF2H2 TAF11 NUP35 POM121 CCNT1 CDK7 NMT1 RAN TSG101 POLR2B RAE1 MNAT1 CDK9 RANGAP1 SUPT4H1 TPR VPS37C RANBP1 NUP214 ERCC3 RANBP2 TAF6 SSRP1 GTF2F2 AAAS TAF1…	c2.cp
REACTOME_INTERACTIONS_OF_VPR_WITH_HOST_CELLULAR_PROTEINS	0.931498	1	-0.229268	-0.696858	2841	31	NUPL2 SEH1L PSIP1 NUP50 NUP93 SLC25A5 NUP155 NUP133 KPNA1 NUP37 NUP153 SLC25A4 NUP54 NUP43 NUP210 NUP35 POM121 SLC25A6 RAE1 TPR NUP214 RANBP2 HMGA1 BANF1 AAAS NUP205 NUP62 NUP107 NUP88 NUP85 NUP188	c2.cp
REACTOME_APC_C_CDH1_MEDIATED_DEGRADATION_OF_CDC20_AND_OTHER_APC_C_CDH1_TARGETED_PROTEINS_IN_LATE_MITOSIS_EARLY_G1	0.725794	1	0.282785	0.857347	5486	64	UBE2C PSMB9 CDC20 PSMB8 RPS27A PTTG1 CDC26 AURKA PSMB10 PSME1 PSMC4 PSMD13 PSMB1 UBA52 PSME2 PSMD9 PSMC5 PSMB5 PSMB4 PSMD6 PSMB6 PSMC3 PSME4 PSMD4 ANAPC2 PSMB3 PSMB7 PSMF1 PSMA2 PSMD8 PSMD3 ANAPC11	c2.cp
REACTOME_ACTIVATION_OF_ATR_IN_RESPONSE_TO_REPLICATION_STRESS	0.447712	1	0.370157	1.01368	3150	35	CDC45 MCM10 CDK2 MCM5 CDC25C MCM7	c2.cp
REACTOME_APC_C_CDC20_MEDIATED_DEGRADATION_OF_MITOTIC_PROTEINS	0.875494	1	0.250972	0.763191	6651	65	UBE2C PSMB9 CDC20 PSMB8 RPS27A PTTG1 CDC26 PSMB10 PSME1 PSMC4 PSMD13 PSMB1 UBA52 PSME2 PSMD9 PSMC5 PSMB5 PSMB4 PSMD6 PSMB6 PSMC3 PSME4 PSMD4 ANAPC2 PSMB3 PSMB7 PSMF1 PSMA2 PSMD8 PSMD3 ANAPC11	c2.cp
REACTOME_AUTODEGRADATION_OF_CDH1_BY_CDH1_APC_C	0.694526	1	0.294056	0.872667	5176	56	UBE2C PSMB9 PSMB8 RPS27A CDC26 PSMB10 PSME1 PSMC4 PSMD13 PSMB1 UBA52 PSME2 PSMD9 PSMC5 PSMB5 PSMB4 PSMD6 PSMB6 PSMC3 PSMD4 ANAPC2 PSMB3 PSMB7 PSMF1 PSMA2 PSMD8 PSMD3 ANAPC11 PSMA7 CDC16	c2.cp
REACTOME_REGULATION_OF_GLUCOKINASE_BY_GLUCOKINASE_REGULATORY_PROTEIN	0.936849	1	-0.229221	-0.667051	2966	26	NUPL2 SEH1L NUP50 NUP93 NUP155 NUP133 NUP37 NUP153 NUP54 GCKR NUP43 NUP210 GCK NUP35 POM121 RAE1 TPR NUP214 RANBP2 AAAS NUP205 NUP62 NUP107 NUP88 NUP85 NUP188	c2.cp
REACTOME_MITOTIC_PROMETAPHASE	0.996375	1	-0.173327	-0.633479	2198	78	MAD2L1 ITGB3BP PPP2R5E CENPQ ZWILCH PPP2R5C SKA1 CENPO BUB1 KIF2A PAFAH1B1 SKA2 PPP2CB CENPH TAOK1 XPO1 CENPM CENPI SEH1L PPP1CC CLIP1 ZWINT PPP2CA RAD21 DSN1 CDCA8	c2.cp
REACTOME_APC_C_CDC20_MEDIATED_DEGRADATION_OF_CYCLIN_B	0.834576	1	0.302423	0.733837	5483	19	UBE2C CDC20 RPS27A CDC26	c2.cp
REACTOME_SCF_BETA_TRCP_MEDIATED_DEGRADATION_OF_EMI1	0.444308	1	0.349324	1.01596	3250	49	PSMB9 CDC20 PSMB8 RPS27A PSMB10 PSME1 PSMC4 PSMD13 PSMB1 UBA52 PSME2 PSMD9 PSMC5 PSMB5 PSMB4 PSMD6 PSMB6 PSMC3 PSME4 PSMD4 PSMB3 PSMB7 PSMF1 PSMA2 PSMD8 PSMD3	c2.cp
REACTOME_G1_S_SPECIFIC_TRANSCRIPTION	0.508187	1	0.411628	0.97616	3320	17	CDC45 TYMS DHFR POLA1 CDC6	c2.cp
REACTOME_THE_ROLE_OF_NEF_IN_HIV1_REPLICATION_AND_DISEASE_PATHOGENESIS	0.973948	1	0.220892	0.582457	6691	28	HCK DOCK2 LCK CD4	c2.cp
REACTOME_CONVERSION_FROM_APC_C_CDC20_TO_APC_C_CDH1_IN_LATE_ANAPHASE	0.733825	1	0.345433	0.809582	4774	16	UBE2C CDC20 CDC26	c2.cp
REACTOME_PHOSPHORYLATION_OF_THE_APC_C	0.639939	1	0.370643	0.878968	4181	17	UBE2C CDC26	c2.cp
REACTOME_GLUTATHIONE_CONJUGATION	0.639812	1	-0.319524	-0.877177	2175	20	GSTM1 GSTA1 GSTM5 GCLM	c2.cp
REACTOME_PHASE_II_CONJUGATION	0.817111	1	-0.239289	-0.82263	2081	56	GSTM1 MAT1A SULT2A1 UGT2A1 GSTA1 GSTM5 GCLM UGT1A7 SLC35D1 MAT2B BPNT1	c2.cp
REACTOME_ACTIVATION_OF_BH3_ONLY_PROTEINS	0.863224	1	0.298696	0.700045	5616	16	BMF BBC3 DYNLL1 BCL2L11 BID TP53	c2.cp
REACTOME_GLUCOSE_METABOLISM	0.794566	1	0.270517	0.817655	5994	63	PHKA1P1 PGAM2 PCK1 PHKG1 PYGL PFKFB1 PFKFB3 SLC25A1	c2.cp
REACTOME_RNA_POL_III_CHAIN_ELONGATION	0.971079	1	0.232263	0.550804	6345	17	POLR2H POLR2L POLR2F POLR3GL POLR3H POLR1C POLR3C POLR3K POLR1D POLR2E POLR2K POLR3E POLR3F POLR3D POLR3B LZTS1 POLR3A	c2.cp
REACTOME_CLASS_I_MHC_MEDIATED_ANTIGEN_PROCESSING_PRESENTATION	1	1	0.165872	0.57892	8979	232	UBE2C SOCS3 FCGR1A ASB15 SOCS1 NCF2 FCGR1B HLA-C CYBA PSMB9 SPSB1 HLA-G NCF4 HSPA5 MRC1 TAP1 CDC20 PSMB8 UBE2S TMEM189-UBE2V1 CTSS HLA-B CYBB CALR HLA-F RPS27A ASB2 CDC26 ITGB5 LRR1 RBCK1 PSMB10 PSME1 SEC13 PSMC4 DTX3L PDIA3 HLA-A CDC34 SEC24D SEC61B SPSB2 UBE2U PSMD13 ASB6 CBLB PSMB1 UBA52 PSME2 B2M PSMD9 PSMC5 PSMB5 PSMB4 UBE2L6 RNF144B PSMD6 UBE2F PSMB6 SEC24C	c2.cp
REACTOME_ANTIGEN_PROCESSING_UBIQUITINATION_PROTEASOME_DEGRADATION	1	1	-0.134009	-0.55524	1222	195	UBE2D1 TRIM63 UBE2W KLHL13 PJA2 ASB5 CUL5 UBE2Q2 RNF138 PARK2 UBE2V2 UBE2K UBE2B TRIM37 LNPEP RCHY1 UBE3A ATG7 FBXO3 PSMA8 VHL KLHL9 UBA3 RNF6 UBE2N CDC27 WWP1 SKP2 SPSB4 PSMD10 UBE2E3 UBA5 ASB9 WSB1 TRIM36 ASB8 UBR1 RNF182 FBXW7 KLHL20 FBXW11 UBA6 ASB1 PSMA5 ANAPC13 UBA2 CUL2 UBE2D3 UBE3C PSMD12 TPP2 NPEPPS UBE2G1 DZIP3 TRIM9 PJA1 CDC23 UBE2A FBXO27 ASB13 RNF4 SMURF2 GAN DET1 HERC2 SKP1 UBE2J1 A…	c2.cp
REACTOME_INWARDLY_RECTIFYING_K_CHANNELS	0.931034	1	0.247569	0.660164	6425	30	GNG8 KCNJ10 KCNJ14 GNG5 KCNJ8 GNGT2 KCNJ2 KCNJ5 GNB2 GNB3	c2.cp
REACTOME_APC_CDC20_MEDIATED_DEGRADATION_OF_NEK2A	0.876937	1	0.279684	0.695266	5828	21	UBE2C CDC20 RPS27A CDC26	c2.cp
REACTOME_EXTENSION_OF_TELOMERES	0.899854	1	0.264558	0.691561	6154	27	POLD1 POLE POLA1 LIG1 RFC2 PRIM2 RUVBL2 DNA2 POLD2 POLD4 POLA2 DKC1 FEN1	c2.cp
REACTOME_G2_M_CHECKPOINTS	0.49165	1	0.35085	0.989536	3532	41	CDC45 MCM10 CDK2 MCM5 CDC25C CCNB2 CHEK2 MCM7	c2.cp
REACTOME_DNA_STRAND_ELONGATION	0.479716	1	0.371473	0.990566	3310	30	CDC45 MCM5 GINS4 POLD1 MCM7 GINS2 POLA1 LIG1 RFC2 PRIM2 DNA2 POLD2 POLD4 MCM8 POLA2 MCM6	c2.cp
REACTOME_FGFR_LIGAND_BINDING_AND_ACTIVATION	0.47486	1	-0.357891	-0.982505	1614	20	FGF6 FGF23 KL FGF9	c2.cp
REACTOME_CHOLESTEROL_BIOSYNTHESIS	0.669747	1	-0.309928	-0.859409	2246	21	IDI2	c2.cp
REACTOME_GAP_JUNCTION_TRAFFICKING	0.554556	1	0.366855	0.944313	3760	25	GJA3 GJB1 GJB3 GJB7 GJC2 DNM2 GJA4 GJB5 GJC1	c2.cp
REACTOME_VIF_MEDIATED_DEGRADATION_OF_APOBEC3G	0.638786	1	0.311818	0.899986	4650	47	PSMB9 PSMB8 RPS27A PSMB10 PSME1 PSMC4 PSMD13 PSMB1 UBA52 PSME2 PSMD9 PSMC5 PSMB5 APOBEC3G PSMB4 PSMD6 PSMB6 PSMC3 PSME4 PSMD4 PSMB3 PSMB7 PSMF1 PSMA2 PSMD8 PSMD3	c2.cp
REACTOME_SIGNALING_BY_FGFR	0.98954	1	-0.190332	-0.724239	1891	104	FGF6 FGF23 KL FGF9 CAMK4 PRKAR2B PRKACB RICTOR PRKAR1A ADCY1 KRAS PRKCA PTEN PIK3CA NRAS MAPK1 FGF7 PPP2CB CREB1 FRS2 PDPK1 AKT3 PRKCE PDE1B CALM1 SOS1 PDE1A BRAF FGF2 CDKN1B	c2.cp
REACTOME_GAP_JUNCTION_ASSEMBLY	0.556324	1	0.399789	0.936976	3619	16	GJA3 GJB1 GJB3 GJB7 GJC2 GJA4 GJB5 GJC1	c2.cp
REACTOME_RNA_POL_I_TRANSCRIPTION_INITIATION	0.951495	1	-0.220105	-0.630257	3118	24	GTF2H3 GTF2H1 TAF1A RRN3 GTF2H4 POLR1A TAF1B POLR1B POLR2K EHMT2 ERCC2 UBTF ERCC6 GTF2H2 POLR1D CDK7 MNAT1 KAT2B ERCC3 POLR1C CCNH TAF1C GTF2H2B POLR2H	c2.cp
REACTOME_INTRINSIC_PATHWAY_FOR_APOPTOSIS	0.998259	1	0.172024	0.45612	6878	29	BMF BAK1 BBC3 CASP7 DYNLL1 BCL2L11 CASP9 BAX BID DIABLO BCL2L1 TP53	c2.cp
REACTOME_PI3K_CASCADE	0.606073	1	-0.262381	-0.929178	1456	65	FGF6 FGF23 KL PRKAA2 FGF9 PRKAA1 PPM1A EIF4E CAB39L PIK3CA PIK3CB FGF7 FRS2 PDPK1 PRKAG2 CAB39 RPS6KB1	c2.cp
REACTOME_SHC_RELATED_EVENTS	0.516166	1	-0.369741	-0.956285	1803	16	KRAS NRAS MAPK1 SHC3 SOS1 CDK1 YWHAB MAP2K1	c2.cp
NABA_COLLAGENS	0.932671	1	0.239064	0.682334	6759	44	COL2A1 COL4A5 COL9A2 COL1A1 COL4A1 COL4A2 COL9A3 COL16A1 COL27A1 COL6A2 COL4A4 COL18A1 COL6A1 COL11A2 COL5A3	c2.cp
NABA_ECM_GLYCOPROTEINS	0.532708	1	0.28474	0.97632	4657	187	SPP1 DMP1 CYR61 DMBT1 BSPH1 THBS1 TNFAIP6 WISP1 GLDN VWA1 FGB TINAGL1 NID1 SRPX2 LAMA5 TNC CDCP2 MATN1 AEBP1 TGFBI LRG1 MMRN2 SRPX COMP OIT3 CILP2 THBS2 FGL2 TSPEAR EGFLAM SMOC1 WISP2 EMILIN1 VWF EMILIN2 PAPLN OTOG ZP1 SVEP1 IGFALS CRISPLD2 NID2 LAMB2 CILP RSPO3	c2.cp
NABA_CORE_MATRISOME	0.834596	1	0.242198	0.852636	7598	262	SPP1 DMP1 CYR61 DMBT1 COL2A1 BSPH1 THBS1 TNFAIP6 SRGN WISP1 HAPLN2 COL4A5 GLDN VWA1 FGB TINAGL1 CHADL NID1 SRPX2 LAMA5 TNC CDCP2 MATN1 COL9A2 COL1A1 COL4A1 AEBP1 TGFBI LRG1 MMRN2 HSPG2 SRPX COMP OIT3 CILP2 THBS2 FGL2 TSPEAR COL4A2 EGFLAM SMOC1 COL9A3 WISP2 EMILIN1 VWF EMILIN2 PAPLN OTOG ZP1 SVEP1 IGFALS CRISPLD2 NID2 COL16A1 LAMB2 PRELP COL27A1 CILP RSPO3 COL6A2 HAPLN3 EFEMP1 FBLN1 BGN	c2.cp
NABA_BASEMENT_MEMBRANES	0.588523	1	0.329666	0.924638	4204	40	COL4A5 NID1 LAMA5 COL4A1 HSPG2 COL4A2 PAPLN NID2 LAMB2 COL6A2 COL4A4 LAMA1 COL18A1 COL6A1 LAMC1 NTNG2 COLQ LAMB4 LAMC3 COL6A3 AGRN LAMB3	c2.cp

## Sheet: FGSEA HD+ BA9 v HD+ CAU (3)
pathway	pval	padj	ES	NES	nMoreExtreme	size	leadingEdge	type
[truncated: 1,036 more rows]

## Sheet: FGSEA HD+ CAU v C CAU (4)
pathway	pval	padj	ES	NES	nMoreExtreme	size	leadingEdge	type
[truncated: 1,049 more rows]

[truncated: 2 more sheets: FGSEA GTEx BA9 v GTEx CAU (5), FGSEA (3) vs (5)]
